# Supplementary material
Source: publisher figshare collection journal article supplement (https://diabetesjournals.figshare.com/articles/dataset/_/14770101)
Supplement: Supplementary file 1 [file 1]

## Sheet: UP_BP_Dev_vs_Healthy
#Upregulated GO enrichemnt in Development vs Healthy Adult Group
#Biological Process
Category	ID	Term	%	PValue	Genes	List Total	Pop Hits	Pop Total	Fold Enrichment	Bonferroni	Benjamini	FDR
GOTERM_BP_DIRECT	GO:0007155	cell adhesion	6.98561	2.95187e-39	SPON1, COL16A1, CSF3R, COL12A1, ICAM2, TNC, ICAM1, CTGF, CDH6, CDH5, ISLR, CDH3, CYP1B1, TNR, SVEP1, EPHB1, EPHB4, EPHA4, POSTN, CD93, OMD, NPNT, MAG, ADAM12, CERCAM, TYRO3, COL8A2, COL8A1, AJUBA, FREM1, FREM2, EPHA2, COL13A1, PCDH10, FBLIM1, TROAP, DPT, THY1, PCDH12, PCDH19, NID1, NID2, PCDH18, FBLN5, PCDH17, EFNB2, FLRT2, FLRT3, PODXL, 9430020K01RIK, CDH23, CDH24, IGFBP7, CDH26, CADM3, VCAM1, M…	2104	485	18082	2.92377	1.70589e-35	1.70589e-35	1.61674e-35
GOTERM_BP_DIRECT	GO:0001525	angiogenesis	3.93734	3.58449e-27	ACVRL1, NRP1, COL18A1, NRP2, ROBO4, ECM1, FLT1, PLXND1, FLT4, SERPINE1, TNFAIP2, HIF3A, MEOX2, FGF1, CTGF, TMEM100, SOX17, SOX18, PLAU, GJA5, KDR, HOXA3, CYP1B1, THSD7A, EPHB2, HOXA7, EPHB1, EPHB4, EPHB3, EGFL7, ANXA2, MMP2, ADRA2B, HSPG2, GREM1, MMP14, EMCN, CCDC80, COL4A2, NOV, COL4A1, TAL1, HAND2, HAND1, MMRN2, PECAM1, ANGPTL3, COL8A2, COL8A1, MMP19, ADAM8, ANGPTL4, MFGE8, RAPGEF3, EPHA2, ENG,…	2104	239	18082	3.34415	2.07148e-23	1.03574e-23	9.81613e-24
GOTERM_BP_DIRECT	GO:0006935	chemotaxis	2.32854	1.3261e-20	FLT1, LECT2, HMGB2, LSP1, CXCL2, CYR61, CXCL5, AMOT, CYSLTR1, RAC2, C3AR1, CCR7, LGALS9, EAR2, CCR3, CMKLR1, PDGFRB, PDGFRA, IL16, KIT, DOCK2, S100A9, S100A8, CX3CR1, CCL12, CCL11, C5AR1, ECSCR, FPR1, CXCR4, CXCR6, FPR2, CCL9, CCL7, CCL6, CXCR3, CCL4, S1PR1, CCL3, CCL2, SLIT2, CMTM7, LYN, CCR1, CCL24, CMTM3, CMTM5, RARRES2, CXCL12, FES, ACKR4, ACKR3, ACKR2, PF4, FGF10	2104	118	18082	4.00573	7.66355e-17	1.99568e-17	1.89139e-17
GOTERM_BP_DIRECT	GO:0007275	multicellular organism development	9.35648	1.38133e-20	SERPINE2, IKZF1, TMEM88, INSC, STMN1, HOXA3, KDR, HOXA2, TNFSF11, HOXA1, QK, EPHB2, HOXA7, SOX6, EPHB4, HOXA5, IFITM5, EPHB3, HOXA4, EPHA4, MEF2C, PAQR7, EBF1, EBF2, SOX11, UNC5C, EBF3, EBF4, DKK2, DKK3, SFRP4, ARC, SFRP1, ISL2, HOXB9, SFRP2, HOXB4, HOXB2, HOXB7, FREM1, HOXB6, FREM2, HOXB5, ADCYAP1R1, NUMBL, COL13A1, DHH, EPAS1, TWIST2, PDGFB, TWIST1, IGSF9, FLRT2, FLRT3, HOXC5, HOXC4, PLAC1, NKX…	2104	1029	18082	1.84577	7.98273e-17	1.99568e-17	1.89139e-17
GOTERM_BP_DIRECT	GO:0006954	inflammatory response	4.36071	5.39671e-20	TPSB2, NRROS, NCF1, TRIL, TNF, CYSLTR1, C3AR1, IGFBP4, SLC11A1, CD180, F2R, CYBA, NAIP6, LTB4R1, PRKCQ, ADAM8, AGTR2, S100A9, S100A8, EPHA2, CSF1R, C5AR1, FPR1, FPR2, KNG1, NLRP6, TBXA2R, NLRP3, CD14, CCL21A, GSDMD, GGT5, LYN, CCR1, AFAP1L2, CD163, TGFB1, RARRES2, BMP6, IL6, BMP2, CXCL12, SDC1, CSPG4, NFKBID, ECM1, HMGB2, CXCL1, CXCL2, CXCL5, PSTPIP1, CYP26B1, STAB1, OLR1, CCR7, CCR3, PTGIR, ANXA…	2104	344	18082	2.57324	3.11876e-16	6.23751e-17	5.91155e-17
GOTERM_BP_DIRECT	GO:0030198	extracellular matrix organization	2.24386	8.12798e-20	VIT, COL18A1, OLFML2B, ECM2, LAMC3, ELN, LAMC1, OLFML2A, TNF, CYR61, LGALS3, ADAMTSL4, ADAMTSL2, TNR, PDGFRA, POSTN, EGFL6, MIA, NPNT, HSPG2, MMP9, ADAMTS20, MMP11, CCDC80, COL4A2, COL4A1, PXDN, COL4A6, ITGA8, VWA1, LAMA5, TNXB, LAMA2, LAMA1, LAMA4, NTN4, FBLN1, NDNF, NID1, NID2, COL19A1, FBLN5, EGFLAM, ABI3BP, TGFB2, FOXF2, LAMB2, FOXF1, FN1, LAMB1, SMOC2, COL5A3, TGFBI	2104	114	18082	3.99551	4.69716e-16	7.8286e-17	7.41949e-17
GOTERM_BP_DIRECT	GO:0030335	positive regulation of cell migration	3.04826	1.39146e-18	PRR5, SEMA5B, COL18A1, FLT1, TNFAIP6, ITGB3, FGF1, ETS1, CYR61, AQP1, MYLK, PLAU, KDR, C3AR1, CTSH, PDGFRB, PDGFRA, EDN1, HGF, SPHK1, MMP2, F2R, RHOD, FGR, MMP14, KIT, ANGPTL3, MYADM, CDH13, ITGA5, CSF1R, LRRC15, CCL11, ZFP703, SEMA3D, SEMA3B, PDGFB, CXCR4, SEMA3F, CORO1A, THBS1, AIF1, PLD2, WNT11, PODXL, PDPN, NTF3, S1PR1, CCL3, HAS2, LYN, CCR1, CCL24, TGFB2, TGFB1, FOXF1, MCAM, ARHGEF39, SEMA4C…	2104	203	18082	3.04816	8.04126e-15	1.14875e-15	1.08872e-15
GOTERM_BP_DIRECT	GO:0045766	positive regulation of angiogenesis	2.15919	6.52737e-17	SEMA5A, ACVRL1, ECM1, FLT1, ITGB3, ITGB2, SERPINE1, ADM, BRCA1, FGF1, ETS1, AQP1, LGALS3, CYSLTR1, KDR, C3AR1, CYP1B1, CTSH, CD34, CCR3, CAMP, PTGIS, ANXA3, HGF, SPHK1, WNT5A, VASH2, MMP9, TGFBR2, GREM1, IL1A, SFRP2, DDAH1, ANGPTL3, RAPGEF3, ENG, CX3CR1, CCL11, C5AR1, GATA6, GATA2, THBS1, PIK3R6, TBXA2R, CXCR3, SASH1, CCL24, ANGPT2, CMA1, VEGFC, TEK	2104	121	18082	3.62231	6.41598e-13	4.71521e-14	4.4688e-14
GOTERM_BP_DIRECT	GO:0008284	positive regulation of cell proliferation	5.50381	5.74319e-16	TNC, FGF1, ETS1, TNF, CTGF, FGF5, CDC20, LGALS3, EDNRA, FGF7, EFEMP1, EDNRB, PLAU, MYC, HOXA3, KDR, PDGFRB, OSR2, PDGFRA, HGF, WNT5A, F2R, SOX11, AR, SFRP1, SFRP2, SMO, AGTR2, KIF20B, CSF1R, CALCRL, PDGFB, AKR1C18, EFNB2, PLAC8, WNT2, IL11RA1, LYN, WWTR1, TGFB2, JUN, TGFB1, FN1, LIF, CDC7, IGF1, BMP4, ACER2, IL6, CXCL12, KITL, TLX1, CDK2, FGF18, BCL2, ID4, FGFR2, FGF10, FGFR1, COL18A1, CDCA7L, FL…	2104	542	18082	2.06132	3.20799e-12	3.68777e-13	3.49505e-13
GOTERM_BP_DIRECT	GO:0030199	collagen fibril organization	1.10076	1.12421e-14	FOXC2, FOXC1, TNXB, COL14A1, COL11A1, DPT, ADAMTS2, ADAMTS14, SERPINH1, CYP1B1, TGFB2, ANXA2, LUM, SERPINF2, GREM1, COL1A1, MMP11, COL3A1, SFRP2, COL1A2, COL5A1, LOX, COL5A2, LMX1B, FMOD, DDR2	2104	39	18082	5.7294	6.48014e-11	6.49679e-12	6.15728e-12
GOTERM_BP_DIRECT	GO:0002376	immune system process	4.10669	1.29456e-13	IFITM3, CD86, IFITM1, NRROS, PGLYRP2, IFITM2, CLEC4N, TRIL, LST1, HP, ETS1, IFIT2, FCNA, LGALS3, CLEC5A, LGALS9, PGLYRP1, CD180, FCGR1, CLEC4D, NAIP6, BTK, SERPING1, PRKCQ, MASP1, CLEC4E, S100A9, CFB, S100A8, CSF1R, CFH, CFI, GATA3, MST1R, CFP, CD79B, NLRP6, INPP5D, BTLA, CD300LB, NLRP3, CD14, CD300LF, CD300LG, GSDMD, LYN, PRG2, SSC5D, BST2, MARCO, GPR183, LCN2, TNFRSF13B, HMGB2, HMGB3, CD3E, IFI…	2104	383	18082	2.17658	7.48103e-10	6.80115e-11	6.44574e-11
GOTERM_BP_DIRECT	GO:0008285	negative regulation of cell proliferation	4.10669	1.51939e-13	IFITM3, IFITM1, SERPINE2, NRK, TNF, FGFRL1, CDH5, NPPC, GJA1, PTTG1, CYP1B1, HIST1H2AG, SOX7, CER1, HIST1H2AB, HIST1H2AO, IGFBP3, F2R, HIST1H2AP, AR, SFRP4, SFRP1, SFRP2, CSF1R, TWIST2, DPT, GATA3, INPP5D, LYN, NFE2, TGFB2, JUN, TGFB1, BCL11B, TGFB3, CAV2, CAV1, LIF, IGF1, INHBA, SMAD6, PHOX2B, BMP5, BMP4, IL6, BMP2, RGCC, GJB6, BCL2, NOX4, FGFR2, FGF10, ACVRL1, FLT3, ADM, PTH1R, GLI3, WISP2, BDK…	2104	384	18082	2.17091	8.78348e-10	7.31715e-11	6.93476e-11
GOTERM_BP_DIRECT	GO:0042060	wound healing	1.69348	1.67155e-13	SPARC, BNC1, SERPINE1, TNC, CCM2L, CXCL2, GLI3, AQP1, CNN2, FGF7, CDH3, NLRP6, PLAU, MUSTN1, ERBB2, TIMP1, PDGFRB, PDGFRA, TGFB2, TGFB1, TGFB3, CAV1, SLC11A1, NOG, WNT5A, TPM1, FN1, DCN, TGFBR2, COL1A1, IL6, COL3A1, VANGL2, LOX, PTK7, PECAM1, SDC1, S100A8, FGF10, ITGA9	2104	94	18082	3.65707	9.66246e-10	7.43069e-11	7.04237e-11
GOTERM_BP_DIRECT	GO:0070374	positive regulation of ERK1 and ERK2 cascade	2.54022	3.28481e-13	NRP1, ITGB3, FLT4, HTR2B, TREM2, ADRA1A, CTGF, ICAM1, C1QTNF3, EDNRA, BMPER, GLIPR2, KDR, FFAR4, TNFAIP8L3, CD36, FAM150B, PDGFRB, FGB, PDGFRA, FGA, SERPINF2, F2R, FGG, NPNT, IL1A, HAND2, GAS6, CSF1R, CCL12, CCL11, C5AR1, PDGFB, NOD2, CCL9, CCL7, CCL6, CCL4, CCL3, PRKCDBP, CCL2, CCL21A, CCR1, CCL24, JUN, TGFB1, GM13304, EPOR, BMP4, IL6, BMP2, TRPV4, GPR183, FGF18, SPRY2, NOX4, ACKR3, TEK, FGFR2, …	2104	188	18082	2.7428	1.89849e-09	1.35592e-10	1.28506e-10
GOTERM_BP_DIRECT	GO:0007160	cell-matrix adhesion	1.4818	1.07976e-12	SNED1, TNXB, COL13A1, ITGB3, MSLNL, ITGB2, ITGAL, NID1, ADAMTS12, MSLN, NID2, CTGF, OTOA, MADCAM1, ITGB7, CD34, FGB, FGA, VCAM1, MIA, ITGA1, FGG, FN1, EMP2, NPNT, COL3A1, COL5A3, ITGA11, ZYX, ITGA8, ANGPTL3, ADAM8, HOXD3, TEK, FREM1	2104	78	18082	3.85633	6.24018e-09	4.15996e-10	3.94257e-10
GOTERM_BP_DIRECT	GO:0001503	ossification	1.60881	9.90423e-12	FOXC2, FOXC1, ECM1, IFITM1, SPARC, COL13A1, COL11A1, LRRC17, TWIST1, PTH1R, PTN, CHRDL1, CTGF, NPPC, CLEC3B, TNFSF11, ATP6V0A4, PDLIM7, GPM6B, GDF10, AHSG, IGF2, MMP9, BMP6, BMP5, BMP4, IGSF10, MMP14, BMP2, SMO, MMP16, FGF18, COL5A2, MGP, BCL2, TMEM119, DDR2, LTF	2104	96	18082	3.40183	5.72363e-08	3.35071e-09	3.17561e-09
GOTERM_BP_DIRECT	GO:0001938	positive regulation of endothelial cell proliferation	1.31245	9.94886e-12	SEMA5A, ACVRL1, ECM1, CCL11, ITGB3, FLT4, HTR2B, HMGB2, PDGFB, NRARP, THBS4, KDR, CCL2, WNT2, CCR3, CCL24, EGFL7, JUN, CAV2, CAV1, WNT5A, VASH2, VEGFC, CYBA, BMP6, BMP4, NR4A1, BMP2, CXCL12, PLXNB3, CDH13	2104	67	18082	3.97638	5.74942e-08	3.35071e-09	3.17561e-09
GOTERM_BP_DIRECT	GO:0001666	response to hypoxia	2.45555	1.04365e-11	ACVRL1, RYR1, RYR2, ALAS2, FLT1, ADM, PLOD2, PLAT, PYGM, TRH, HIF3A, ETS1, NPPC, EDNRA, PLAU, KDR, CAR9, NOS1, POSTN, EDN1, MYOCD, PTGIS, MMP2, CYBA, TGFBR2, AGTR1B, MMP14, ANGPTL4, CRYAA, CRYAB, AJUBA, CHRNA4, EPAS1, CXCR4, KCNA5, ASCL2, CYGB, PLD2, PDLIM1, HSD11B2, CCL2, EGR1, EGLN3, TGFB2, TGFB1, VCAM1, ANGPT2, TGFB3, CAV1, VEGFC, WTIP, SOD3, BMP2, CXCL12, P2RX2, TACC3, NOX4, TEK	2104	192	18082	2.59614	6.03128e-08	3.35071e-09	3.17561e-09
GOTERM_BP_DIRECT	GO:0001570	vasculogenesis	1.31245	1.58318e-11	YAP1, CITED1, ADM, FOXM1, ZFP36L1, AMOT, GJC1, TMEM100, SOX17, SOX18, HEY2, KDR, HAS2, QK, PITX2, JUNB, EGFL7, MYOCD, TGFB1, FZD4, FOXF1, TIE1, CAV1, TGFBR2, SMO, WT1, ACKR3, TEK, ZFPM2, EPHA2, ENG	2104	68	18082	3.9179	9.14925e-08	4.58203e-09	4.34258e-09
GOTERM_BP_DIRECT	GO:0016525	negative regulation of angiogenesis	1.35478	1.58575e-11	CX3CR1, FOXC1, SPARC, HHIP, ECSCR, PLG, PTN, THBS2, ISM1, THBS1, THBS4, AMOT, CRHR2, ADAMTS1, APOH, STAB1, CCL2, CD36, HOXA5, ANGPT2, TIE1, SERPINF1, LIF, SULF1, DCN, RGCC, COL4A2, OPTC, NGP, TEK, EPHA2, PF4	2104	72	18082	3.8196	9.16407e-08	4.58203e-09	4.34258e-09
GOTERM_BP_DIRECT	GO:0007507	heart development	2.96359	2.80561e-11	NRP1, NRP2, SPARC, HTR2B, ADM, PCSK5, GLI3, GLI2, GJA1, EDNRA, CASP7, SOX18, CASP3, SH3PXD2B, HEY2, PITX2, EDN1, MEF2C, MYOCD, OSR1, MMP2, GAB1, KCNAB1, MMP9, AGTR1A, TGFBR2, ADAM19, VCAN, LOX, HAND2, ALDH1A2, TNNT2, HAND1, APLNR, ZFPM2, FREM2, ENG, FOXC2, FOXC1, CALCRL, PDGFB, GATA5, LRP2, PTN, GATA2, ZFP36L1, GJC1, PDLIM3, FLRT3, ERBB2, MSX1, STRA6, TGFB2, TGFB1, VCAM1, KCNJ8, FOXF1, PDE2A, EPO…	2104	261	18082	2.30493	1.62136e-07	7.72077e-09	7.3173e-09
GOTERM_BP_DIRECT	GO:0007067	mitotic nuclear division	3.04826	6.7596e-11	ZWILCH, CCNF, BUB1B, KIF11, SMC2, CDC20, SGOL1, PTTG1, MIS18BP1, NUF2, NUSAP1, NEK2, OIP5, FBXO5, SPDL1, CEP55, HELLS, BORA, KIF23, CDC25C, KNSTRN, GEM, CIT, CDC25B, CCNA2, ASPM, LATS2, ESPL1, INCENP, TIMELESS, BIRC5, FAM64A, KIF2C, KIF20B, CDCA2, CDCA3, RGS14, CDCA5, CDCA8, FIGN, KLHL13, SKA3, AURKC, PMF1, AURKB, SKA1, NCAPH, AURKA, CCNB2, CCNB1, DSN1, HAUS8, FAM83D, BUB1, CENPW, DYNLT1B, SPAG5,…	2104	277	18082	2.23385	3.90637e-07	1.77562e-08	1.68283e-08
GOTERM_BP_DIRECT	GO:0060326	cell chemotaxis	1.35478	1.87555e-10	SEMA5A, CCL12, SAA3, HMGB2, FPR1, LPAR1, PDGFB, CXCL1, FPR2, CXCL2, CXCL5, CCL9, CCL6, CCL4, CCL3, CCL2, EPHB1, PDGFRB, PDGFRA, VCAM1, HGF, ITGA1, AGTR1A, CXCL12, HOXB9, NOV, BIN2, GPR183, KIT, PLXNB3, PRKCQ, EPHA2	2104	78	18082	3.52579	1.08388e-06	4.71253e-08	4.46626e-08
GOTERM_BP_DIRECT	GO:0001822	kidney development	1.82049	2.98564e-10	CDKN1C, FOXC2, FOXC1, CITED1, TCF21, GATA3, PCSK5, GLI3, GLI2, WNT11, ADAMTS1, SIX2, GPC3, HAS2, STRA6, PDGFRB, CAR2, TGFB2, ACE, KCNJ8, SERPINF1, IRX3, ARID5B, SOX11, SULF1, BMP6, AGTR1A, DCN, AGTR1B, SULF2, REN1, BMP4, CENPF, WT1, ALDH1A2, MMP17, ITGA8, BCL2, RGN, TIMELESS, DCHS1, FAT4, FBN1	2104	130	18082	2.84267	1.7254e-06	7.18917e-08	6.81347e-08
GOTERM_BP_DIRECT	GO:0001568	blood vessel development	1.27011	3.31646e-10	FOXC2, FOXC1, LAMA4, PDGFB, ANTXR1, FOXS1, SOX18, GJA5, GJA4, HEY2, STRA6, PDGFRB, EGFL7, MEF2C, TGFB2, FZD4, FOXF1, TIE1, SPHK1, TBX3, AGTR1A, AGTR1B, COL1A1, BMP4, COL3A1, COL1A2, COL5A1, LOX, ALDH1A2, EPHA2	2104	71	18082	3.63131	1.91658e-06	7.66634e-08	7.26571e-08
GOTERM_BP_DIRECT	GO:0048704	embryonic skeletal system morphogenesis	1.10076	3.54653e-10	FOXC2, COL11A1, TWIST1, GLI3, GSC, SIX2, HOXA3, HOXA2, HOXA7, HOXA5, HOXA4, OSR2, MEF2C, PRRX1, PRRX2, SOX11, HSPG2, BMP4, HOXB4, HOXB2, HOXD3, HOXD9, HOXB7, MDFI, HOXB6, HOXB5	2104	55	18082	4.06267	2.04954e-06	7.82864e-08	7.41953e-08
GOTERM_BP_DIRECT	GO:0050729	positive regulation of inflammatory response	1.18544	3.65761e-10	CCL12, CCL11, SERPINE1, TNF, ETS1, IL1RL1, CCL9, EDNRA, CCL7, CCL6, CCL4, CCL3, CCL2, GPSM3, TGM2, IL33, CCL24, ACE, WNT5A, PDE2A, PLA2G4A, GPRC5B, FABP4, TRPV4, ADAM8, ZP3, S100A9, S100A8	2104	63	18082	3.8196	2.11373e-06	7.82864e-08	7.41953e-08
GOTERM_BP_DIRECT	GO:0043410	positive regulation of MAPK cascade	1.56647	6.46536e-10	FLT1, ITGB3, FLT4, PELI2, LPAR1, PDGFB, NOD2, ADRA1B, ADRA1A, ERBB2, KDR, TIMP2, BNIP2, CD36, KSR1, IGFBP4, CAV2, IGFBP3, F2R, IGF2, OSM, LIF, GAB1, IGF1, TNFRSF1B, SORBS3, SSTR4, P2RX7, AR, IL6, BMP2, PTPRC, BANK1, KIT, FGFR2, FGF10, FGFR1	2104	104	18082	3.05752	3.73632e-06	1.3344e-07	1.26467e-07
GOTERM_BP_DIRECT	GO:0010628	positive regulation of gene expression	3.81033	7.64776e-10	CITED1, ITGB3, SERPINE1, HMGB2, TNC, MPL, BRCA1, IKZF1, LRRC32, CD3E, TNF, ACTG2, CTGF, TRIM6, GJA1, CYP26B1, CDH3, SOX17, CTSH, SOX8, QK, LGALS9, CD34, OSR2, MEF2C, OSR1, SLC11A1, NOG, AVPR2, PLAUR, SOX11, NGF, ACTA2, SFRP4, IL1A, AR, MAF, SMO, HAND2, ALDH1A2, KIT, GAS6, ENG, FOXC1, NR1I2, PDGFB, TWIST1, GATA3, IL2RG, IQGAP3, CRHR2, CNN2, WNT6, WNT11, MUSTN1, ERBB2, CCL3, IL33, EGR1, TGFB2, TGFB…	2104	399	18082	1.93852	4.41963e-06	1.52401e-07	1.44437e-07
GOTERM_BP_DIRECT	GO:0016477	cell migration	2.2862	8.44845e-10	NRP1, FLT1, ITGB3, LAMC1, TREM3, TREM1, CTGF, PSTPIP1, MDK, SIX2, KDR, HOXA5, EPHB3, PDGFRB, RHBDF1, PDGFRA, MMP2, WNT5A, EMP2, SSTR4, ARC, DEPDC1B, MMP14, FSCN1, ITGA7, ERG, DOCK1, EPHA3, EPHA2, LAMA5, FOXC1, SDC2, CXCR4, ADAMTS12, CORO1A, THBS1, EFNB2, RELN, PODXL, S1PR1, FAM83D, TSPAN1, CTHRC1, TGFB2, TGFB1, LAMB1, FMNL3, COL5A1, PTK7, SNAI1, SNAI2, SDC1, CD248, DCHS1	2104	191	18082	2.42975	4.88235e-06	1.62745e-07	1.54241e-07
GOTERM_BP_DIRECT	GO:0048661	positive regulation of smooth muscle cell proliferation	1.31245	1.92388e-09	NOTCH3, CALCRL, ITGB3, PDGFB, PTGS2, THBS1, TNF, AIF1, WISP1, ORC1, MYC, RBPMS2, S1PR1, C3AR1, SKP2, ELANE, TGM2, PDGFRB, EGR1, JUN, EDN1, SERPINF2, CYBA, IGF1, SULF1, TGFBR2, BMP4, IL6, NR4A3, CDH13, FGFR2	2104	80	18082	3.33022	1.1118e-05	3.58648e-07	3.39905e-07
GOTERM_BP_DIRECT	GO:0007204	positive regulation of cytosolic calcium ion concentration	1.90517	2.20575e-09	PTGER2, C5AR1, OPRL1, FPR1, ADM, CXCL1, ITPR3, FPR2, PTH1R, ADRA1B, GATA2, CXCL2, ADRA1A, MCHR1, KNG1, ADCY5, CACNA1G, GJA1, JPH2, GNG3, EDNRA, EDNRB, TBXA2R, P2RY2, CXCR3, CCL3, KDR, BDKRB2, C3AR1, CD36, PRKG1, CCR1, PDGFRA, PTGIR, EDN1, FZD2, TRPC6, SWAP70, F2R, AVPR1A, AGTR1A, EPOR, AGTR1B, TRPV4, GHRL	2104	148	18082	2.61307	1.27469e-05	3.89502e-07	3.69148e-07
GOTERM_BP_DIRECT	GO:0050679	positive regulation of epithelial cell proliferation	1.27011	2.22419e-09	BNC1, C5AR1, HTRA1, TWIST1, NOD2, FGF1, FGF7, MYC, ERBB2, KDR, SCN5A, OSR2, TGFB1, OSR1, NOG, WNT5A, VEGFC, IGF1, BMP6, TBX18, BMP5, BMP4, IL6, SFRP1, NR4A3, SMO, ID1, GAS1, FGFR2, FGF10	2104	76	18082	3.39241	1.28535e-05	3.89502e-07	3.69148e-07
GOTERM_BP_DIRECT	GO:0030324	lung development	1.69348	3.03966e-09	LAMA5, SPARC, EPAS1, PTN, AARD, FGF1, GLI1, GLI3, CTGF, GLI2, HSD11B1, ADAMTS2, FGF7, PDPN, GPC3, KDR, PITX2, WNT2, HOXA5, STRA6, PDGFRA, FOXF1, WNT7B, WNT5A, LIF, IGF1, TGFBR2, BMP4, MMP14, LOX, NFIB, ALDH1A2, FGF18, MGP, TIMELESS, SPRY2, ZFPM2, FGFR2, FGF10, FGFR1	2104	124	18082	2.77229	1.7566e-05	5.16652e-07	4.89653e-07
GOTERM_BP_DIRECT	GO:0007169	transmembrane receptor protein tyrosine kinase signaling pathway	1.4818	3.27084e-09	CSF1R, PILRB1, PILRB2, FLT1, FLT3, FLT4, NTF3, ERBB2, KDR, EPHB2, EPHB1, EPHB4, EPHB3, LYN, EPHA5, PDGFRB, EPHA4, PDGFRA, ANGPT2, BMX, GFRA2, GFRA4, FGR, ZAP70, HCK, DOK2, DOK4, KIT, BTK, LCP2, CSPG4, TEK, EPHA3, EPHA2, DDR2	2104	100	18082	3.00794	1.8902e-05	5.37577e-07	5.09484e-07
GOTERM_BP_DIRECT	GO:0048566	embryonic digestive tract development	0.592718	3.34881e-09	TGFB2, FOXF2, FOXF1, SCT, RARRES2, TNF, PCSK5, GLI3, GLI2, ALDH1A2, MYB, RARB, STRA6, FGF10	2104	18	18082	6.68431	1.93526e-05	5.37577e-07	5.09484e-07
GOTERM_BP_DIRECT	GO:0007165	signal transduction	9.06012	3.92651e-09	SPARC, HHIP, GJA1, EDNRA, GPR176, HTR7, EDNRB, C3AR1, PLCE1, SOX8, CMKLR1, STARD8, ARRDC3, UNC5C, HPCAL4, TIAM2, DEPDC1B, DEPDC1A, RIN3, AGTR2, ADCYAP1R1, RRAD, PDE1A, IGSF1, LPAR1, FPR1, GATA3, LPAR4, FPR2, CRHR2, FZD1, LYN, CCR1, GPR17, FZD2, BCL11B, FZD4, BCL11A, PDE2A, GDF1, RASSF9, NMBR, GNG11, GNG13, GPR183, PDE3A, PLCH2, ACVRL1, ECM1, GPR20, PTH1R, GLI1, SHD, ARHGAP4, AKAP12, SHE, GPR132, …	2104	1255	18082	1.46545	2.2691e-05	6.13278e-07	5.81229e-07
GOTERM_BP_DIRECT	GO:0030154	cell differentiation	6.13887	8.03535e-09	SEMA5A, SEMA5B, TEX40, SERPINE2, FGF1, BZW2, ETS1, CTGF, CDC20, LGALS3, PEG10, INSC, STMN1, KDR, TNFSF11, QK, THSD7A, KRTDAP, OSR2, SPINK2, MEF2C, PRKCH, SEMA6A, PAQR7, OSR1, WNT5A, MYO7B, SOX11, NPNT, SOX10, SFRP4, SFRP1, OBSCN, SFRP2, EPHA2, DLX1, NOTCH3, DLX2, ADCYAP1R1, COL13A1, EPAS1, SDC2, TWIST2, ECSCR, ILDR2, TWIST1, RASAL1, NDRG2, GATA2, IGSF9, EFNB2, ARHGAP22, PRDM16, ECT2, NTNG1, RARRE…	2104	780	18082	1.59762	4.64352e-05	1.22201e-06	1.15815e-06
GOTERM_BP_DIRECT	GO:0001649	osteoblast differentiation	1.56647	8.30458e-09	DHH, LRRC17, TWIST2, TNC, FHL2, TWIST1, GLI1, CYR61, GLI2, MRC2, GJA1, WNT11, FIGNL1, CCL3, SOX8, JUNB, GDF10, WWTR1, MEF2C, ACTN3, IGFBP3, NOG, IGF2, IGF1, BMP6, COL1A1, BMP4, VCAN, SFRP1, BMP2, SMO, COL6A1, ITGA11, SNAI1, TMEM119, SNAI2, EPHA2	2104	113	18082	2.814	4.7991e-05	1.23057e-06	1.16626e-06
GOTERM_BP_DIRECT	GO:0071347	cellular response to interleukin-1	1.27011	8.81497e-09	CCL12, CCL11, SAA3, SERPINE1, TFPI, ADAMTS12, CXCL2, ICAM1, CCL9, CCL7, CCL6, MYC, CCL4, CCL3, CCL2, HAS2, PCK1, CCL21A, CAMP, ADAMTS7, FGB, CCL24, EDN1, PTGIS, GM13304, FN1, KLF2, IL6, SFRP1, LCN2	2104	80	18082	3.22279	5.09404e-05	1.27354e-06	1.20699e-06
GOTERM_BP_DIRECT	GO:0009887	organ morphogenesis	1.52413	1.06005e-08	LAMA5, NRP1, WNT2B, HHIP, GATA5, CXCR4, TCF21, TNF, EFNB2, TGM1, WNT6, WNT11, GPC3, HOXA3, TNFSF11, SLIT3, EPHB2, PHLDA2, PITX2, PDGFRA, JAG1, TGFB1, TGFB3, FOXF1, WNT5A, IGF2, PAX4, VEGFC, TBX3, FLI1, TGFBR2, GREM1, BMP2, BCL2, FGFR2, FGF10	2104	109	18082	2.83842	6.12582e-05	1.49415e-06	1.41607e-06
GOTERM_BP_DIRECT	GO:0030334	regulation of cell migration	1.22777	1.46316e-08	LAMA5, LAMA2, PLXND1, LAMA1, LAMA4, ITGB3, KIF14, NEXN, CXCR4, THY1, LDB2, AMOT, DOCK10, DPYSL3, FLNA, PLXNC1, PHLDA2, PITX2, PLXNA4, EGFL7, LMO4, GAB1, UNC5C, CXCL12, ABI3, PECAM1, TEK, AJUBA, EPHA3	2104	77	18082	3.23674	8.45526e-05	2.01324e-06	1.90803e-06
GOTERM_BP_DIRECT	GO:0031100	organ regeneration	1.01609	1.95895e-08	NNMT, TGFB1, ANGPT2, ACE, UGT1A1, ANXA3, FLT3, HGF, C5AR1, LIF, APOA2, APOA1, ADM, MKI67, CXCL5, TGFBR2, CCNA2, NR4A3, CXCL12, AXL, APOH, CDK1, CCL2, GAS6	2104	56	18082	3.68319	0.000113202	2.63274e-06	2.49516e-06
GOTERM_BP_DIRECT	GO:0030593	neutrophil chemotaxis	1.1431	2.02688e-08	CCL12, CCL11, ITGAM, CSF3R, ITGB2, C5AR1, CXCL1, TREM3, CXCL2, TREM1, LGALS3, CCL9, CCL7, CCL6, CCL4, CCL3, CCL2, CCL21A, CCL24, TGFB2, GM13304, ITGA1, VAV1, FCGR3, S100A9, S100A8, ITGA9	2104	69	18082	3.36291	0.000117127	2.66015e-06	2.52113e-06
GOTERM_BP_DIRECT	GO:0006909	phagocytosis	0.973751	2.07141e-08	ANXA1, ANXA3, SLC11A1, ITGB2, PLD4, CDC7, MYO7A, TULP1, MERTK, ITGAL, GATA2, CORO1A, VAV1, GULP1, HCK, AXL, PECAM1, PRTN3, CD302, GAS6, DOCK1, ELANE, MYO1G	2104	52	18082	3.80124	0.0001197	2.66015e-06	2.52113e-06
GOTERM_BP_DIRECT	GO:0045944	positive regulation of transcription from RNA polymerase II promoter	7.36664	2.26815e-08	SPI1, MAML2, IKZF1, FGF1, ETS1, TNF, SOX17, SOX18, MYC, MYB, HOXA2, TNFSF11, HOXA1, SOX8, HOXA7, PITX2, SOX6, JUNB, HOXA5, SOX5, OSR2, MEF2C, LMO4, MAMSTR, OSR1, SLC11A1, LMO2, SERPINF2, WNT5A, EBF1, EBF2, EBF3, SOX11, EBF4, SOX10, AR, HOXB9, SFRP2, MAF, SMO, SDPR, HOXB4, LMX1B, ZFPM2, HOXB5, NOTCH3, DLX2, EPAS1, GATA6, GATA5, TWIST1, GATA3, GATA2, PLAC8, BCL2L12, NLRP3, WNT2, NKX2-3, ZBTB7C, WWT…	2104	995	18082	1.50289	0.000131068	2.84949e-06	2.70058e-06
GOTERM_BP_DIRECT	GO:0018108	peptidyl-tyrosine phosphorylation	1.10076	2.33457e-08	CSF1R, FLT1, FLT4, PDGFB, TTK, HK1, EFEMP1, RELN, KDR, EPHB2, LYN, PDGFRB, EPHA4, PDGFRA, FGR, ZAP70, HCK, MELK, FES, ABI3, KIT, BTK, TEK, FGFR2, DDR2, FGFR1	2104	65	18082	3.43764	0.000134906	2.87053e-06	2.72052e-06
GOTERM_BP_DIRECT	GO:0007411	axon guidance	1.82049	2.8336e-08	SEMA5A, NRP1, CSF1R, NRP2, LAMA2, LAMA1, SEMA3A, LAMC1, GATA3, SEMA3F, EFNA4, GLI3, GLI2, EFNB2, RELN, FLRT2, GBX2, FLRT3, DPYSL5, NTF3, BOC, SLIT1, SLIT3, SLIT2, EPHB2, EPHB1, PLXNA4, EPHB3, EPHA5, EPHA4, TGFB2, SEMA6A, LAMB2, NOG, WNT5A, LAMB1, UNC5C, GAP43, EFNA2, NR4A3, KIF26A, KIF26B, GAS1	2104	149	18082	2.48018	0.00016374	3.41154e-06	3.23325e-06
GOTERM_BP_DIRECT	GO:0008360	regulation of cell shape	1.73582	3.20882e-08	CSF1R, CCL12, CCL11, FBLIM1, WIPF1, PALM2, LST1, LPAR1, PTN, ARHGAP15, CORO1A, COCH, ICAM1, CCL7, PDPN, CCL3, KDR, CCL2, CCL24, ANXA1, TPM1, FN1, ARAP3, MSN, CDC7, S100B, F2, FMNL3, FGR, HCK, IL6, FMNL1, FES, DLC1, RHOJ, KIT, PLXNB3, CDC42EP2, ITGA7, PLEKHO1, GAS7	2104	139	18082	2.53495	0.000185421	3.78445e-06	3.58668e-06
GOTERM_BP_DIRECT	GO:0045907	positive regulation of vasoconstriction	0.889077	3.30323e-08	FGB, FGA, CAV1, AVPR2, F2R, FGG, PDGFB, AVPR1A, SMAD6, PTGS2, ADRA1B, ADRA1A, ICAM1, PTGS1, CYSLTR1, GJA1, HRH2, TBXA2R, ALOX5, GJA5, TBXAS1	2104	45	18082	4.01058	0.000190876	3.81788e-06	3.61836e-06
GOTERM_BP_DIRECT	GO:0007049	cell cycle	4.99577	3.61451e-08	STEAP3, ZWILCH, DSCC1, CCNF, BUB1B, IKZF1, MKI67, SMC2, CDC20, PTTG1, NUSAP1, NEK2, OIP5, FBXO5, HMCN1, BORA, LIG1, ESCO2, CDC25C, KNSTRN, CDC25B, MELK, TIMELESS, FAM64A, KIF20B, AJUBA, CDCA2, CDCA3, CDCA5, CDCA8, KLHL13, SKA3, PMF1, NCAPH, SKA1, CCNB2, DSN1, CCNB1, BRINP1, CLSPN, ECT2, FAM83D, BRINP3, FANCI, CDT1, UBE2C, PLK1, CDC7, CDC6, NDC80, ANLN, TPX2, KIF18B, RGCC, STAG3, NASP, CDK2, CDK1,…	2104	614	18082	1.65164	0.000208861	4.09574e-06	3.8817e-06
GOTERM_BP_DIRECT	GO:0051301	cell division	3.4293	3.90628e-08	ZWILCH, CCNF, KIF14, BUB1B, KIF11, SMC2, CDC20, SEPT6, SGOL1, PTTG1, MIS18BP1, NUF2, NUSAP1, NEK2, OIP5, FBXO5, HMCN1, SPDL1, CEP55, HELLS, BORA, LIG1, KIFC5B, SEPT1, KIF23, CDC25C, KNSTRN, CIT, CDC25B, CCNA2, ASPM, LATS2, KIFC1, INCENP, CKS2, TIMELESS, BIRC5, FAM64A, MCM5, KIF2C, KIF20B, CDCA2, CDCA3, RGS14, CDCA5, CDCA8, FIGN, KLHL13, SKA3, AURKC, PMF1, AURKB, SKA1, NCAPH, AURKA, CCNB2, CCNB1, …	2104	374	18082	1.86129	0.000225719	4.34123e-06	4.11437e-06
GOTERM_BP_DIRECT	GO:0060021	palate development	1.27011	4.21863e-08	BNC2, WFIKKN2, TWIST1, TCF21, MEOX2, GLI3, WNT11, PRDM16, MSX1, MSC, EPHB2, EPHB3, OSR2, PDGFRA, MEF2C, TGFB2, FOXF2, PRRX1, TGFB3, OSR1, WNT5A, ARID5B, INHBA, TBX3, TBX2, TGFBR2, HAND2, SNAI1, SNAI2, GAS1	2104	85	18082	3.03321	0.000243765	4.5999e-06	4.35952e-06
GOTERM_BP_DIRECT	GO:0071356	cellular response to tumor necrosis factor	1.4818	4.96958e-08	CCL12, CCL11, BRCA1, SLC2A4, GATA3, ADAMTS12, THBS1, ICAM1, ZFP36L1, CCL9, ZFP36, CCL7, CCL6, CCL4, CCL3, CCL2, HAS2, PCK1, CCL21A, CAMP, ADAMTS7, CCL24, POSTN, EDN1, VCAM1, GM13304, CYBA, NPNT, KLF2, COL1A1, IL6, SFRP1, FABP4, LCN2, DBN1	2104	110	18082	2.73449	0.000287151	5.31837e-06	5.04044e-06
GOTERM_BP_DIRECT	GO:0048565	digestive tract development	0.84674	5.11972e-08	MYOCD, TGFB1, TGFB3, FOXF1, GATA6, GATA5, GATA3, GATA2, TGFBR2, COL3A1, CCNB1, CLMP, SMO, HRH2, KIT, DCHS1, FAT4, FGFR2, NKX2-3, FGF10	2104	42	18082	4.09243	0.000295825	5.37943e-06	5.09831e-06
GOTERM_BP_DIRECT	GO:0042493	response to drug	3.17528	5.26865e-08	CD86, COL18A1, HMGB2, HTR2B, WFDC1, ADRA1A, SLC6A2, ICAM1, AQP1, NPPC, CDH3, LGALS1, MDK, KDR, TIMP2, CAR9, JUNB, TGIF1, ANXA1, UGT1A1, MMP2, IGFBP2, DNMT3A, APOA2, PAX4, APOA1, CYBA, FOS, MMP9, DUSP6, GIP, TGFBR2, AGTR1B, REN1, SFRP1, SFRP2, LOX, CYP2E1, CRYAA, CHRNA3, ADCYAP1R1, NNMT, GATA6, MGST1, ADCY1, PTN, GATA3, PTGS2, THBS1, RAD54B, HSD11B2, CCNB1, TBXA2R, CCL3, RAD54L, FZD1, LYN, TGFB2, …	2104	339	18082	1.90135	0.000304429	5.43706e-06	5.15293e-06
GOTERM_BP_DIRECT	GO:0009612	response to mechanical stimulus	1.05843	5.51665e-08	TNC, KCNA5, THBS1, MPO, ETS1, GLI2, CCNB1, PIEZO2, CCL2, CD36, JUNB, POSTN, JUN, ANGPT2, CAV1, MMP2, IGFBP2, DCN, TGFBR2, P2RX7, COL3A1, MMP14, CXCL12, FOSB, KCNK2	2104	63	18082	3.41036	0.000318756	5.59311e-06	5.30082e-06
GOTERM_BP_DIRECT	GO:0048514	blood vessel morphogenesis	0.762066	7.03351e-08	ACVRL1, EDN1, FLT1, ANGPT2, FLT4, SERPINF2, PDGFB, NR2F2, THBS1, AMOT, EFNB2, GJA1, COL4A1, ITGA7, CYP1B1, FGFR1, EPHA2, FGF10	2104	35	18082	4.41983	0.000406384	7.00804e-06	6.64181e-06
GOTERM_BP_DIRECT	GO:0050728	negative regulation of inflammatory response	1.27011	7.55768e-08	CALCRL, TNFAIP6, WFDC1, AOAH, GATA3, ETS1, C1QTNF3, SOCS3, NT5E, ZFP36, PBK, FFAR4, NLRP3, TNFAIP8L2, SLIT2, LGALS9, APOE, PGLYRP1, IER3, PTGIS, FOXF1, HGF, SERPINF1, APOA1, TNFRSF1B, PROC, NOV, TYRO3, GHRL, SMPDL3B	2104	87	18082	2.96348	0.000436663	7.40268e-06	7.01583e-06
GOTERM_BP_DIRECT	GO:0045087	innate immune response	3.55631	8.90606e-08	IFITM3, IFITM1, IFITM2, NRROS, CLEC4N, TRIL, HMGB2, HMGB3, TREM2, IFIT2, IFIH1, FCNA, CD1D2, LGALS3, PSTPIP1, CD1D1, CLEC5A, TNFAIP8L2, PGLYRP1, MBL1, CAMP, MBL2, FGB, FGA, ANXA1, CD180, FGG, CYBA, TMEM173, FCGR1, FGR, HCK, ZAP70, TYROBP, CLEC4D, NAIP6, ELF4, BTK, SERPING1, TLR8, TRIM59, IRF5, TLR7, TLR6, MASP1, CLEC4E, SMPDL3B, S100A9, TRIM10, S100A8, CFB, TLR13, C1QB, CSF1R, APCS, CLEC4A2, NLRP…	2104	400	18082	1.80476	0.000514549	8.57802e-06	8.12975e-06
GOTERM_BP_DIRECT	GO:0007229	integrin-mediated signaling pathway	1.31245	1.04181e-07	LAMA5, ITGAM, ITGB3, ITGB2, ITGAE, ITGAL, TSPAN32, CTGF, ADAMTS14, ADAMTS3, ADAMTS19, MADCAM1, ITGB7, ITGA1, ADAM33, APOA1, VAV1, ADAMTS20, ADAM19, FGR, COL3A1, TYROBP, ITGA11, ZYX, ITGA8, ITGA7, ADAM8, ITGA5, CDH17, FERMT3, ITGA9	2104	93	18082	2.8647	0.000601878	9.85514e-06	9.34013e-06
GOTERM_BP_DIRECT	GO:0016337	single organismal cell-cell adhesion	1.43946	1.05731e-07	TNXB, ITGAM, COL13A1, FBLIM1, ITGB2, ICAM2, THY1, ITGAL, CYR61, ICAM1, CDH5, CDH3, SRPX2, PDPN, BOC, CDH24, SLIT2, ICOS, CD34, MPZL2, CD53, KIRREL, VCAM1, CD93, FOXF1, CD2, CLDN5, EMCN, CCDC80, BCL2, ESAM, ADAM8, TEK, LIMS2	2104	108	18082	2.70555	0.000610832	9.85514e-06	9.34013e-06
GOTERM_BP_DIRECT	GO:0001934	positive regulation of protein phosphorylation	2.03218	1.21772e-07	PRR5, CSF1R, FLT3, FLT4, PELI2, OPRL1, ITLN1, CXCR4, FGF1, IQGAP3, TNF, AIF1, CYR61, CTGF, EDNRA, EDNRB, ERBB2, KDR, RSPO1, CAMP, FZD1, TGFB1, ANXA2, SPHK1, RARRES2, IL34, WNT5A, IGF2, PLAUR, NGF, F2, MAPK15, MMP9, RGMA, P2RX7, BMP4, DAB2, GPRC5B, BMP2, FNDC1, DOK7, TEK, AGRN, CRYAA, GAS6, CARD14, RAPGEF3, ENG	2104	184	18082	2.24194	0.000703474	1.09652e-05	1.03922e-05
GOTERM_BP_DIRECT	GO:0001657	ureteric bud development	0.889077	1.23333e-07	FOXC2, FOXC1, TGFB1, OSR1, NOG, TCF21, NPNT, SMAD6, BMP4, VCAN, SFRP1, BMPER, WT1, BCL2, SDC1, RARB, SPRY1, SLIT2, FGFR2, CER1, FGFR1	2104	48	18082	3.75992	0.000712487	1.09652e-05	1.03922e-05
GOTERM_BP_DIRECT	GO:0050766	positive regulation of phagocytosis	0.889077	1.23333e-07	AHSG, PROS1, SLC11A1, CYBA, NOD2, TULP1, MERTK, GATA2, TNF, FCGR1, FCGR3, MEX3B, CCR7, PTX3, CD36, DOCK2, FCGR2B, MFGE8, GAS6, MBL1, MBL2	2104	48	18082	3.75992	0.000712487	1.09652e-05	1.03922e-05
GOTERM_BP_DIRECT	GO:0001569	patterning of blood vessels	0.804403	1.27254e-07	SEMA5A, NRP1, FOXC2, EDN1, FLT1, PLXND1, CXCR4, NRARP, TGFBR2, NFATC4, EDNRA, VANGL2, CXCL12, SFRP2, GBX2, COL4A1, TEK, PITX2, ENG	2104	40	18082	4.0822	0.00073513	1.10588e-05	1.04809e-05
GOTERM_BP_DIRECT	GO:0048706	embryonic skeletal system development	0.84674	1.28212e-07	DLX1, DLX2, NOG, WNT5A, SULF1, PCSK5, DLK1, SULF2, COL1A1, BMP4, WNT11, HOXB9, HOXC5, HOXA3, GAS1, HOXD9, HOXA5, NKX3-2, HOXB6, HOXB5	2104	44	18082	3.90641	0.000740665	1.10588e-05	1.04809e-05
GOTERM_BP_DIRECT	GO:0043627	response to estrogen	1.1431	1.45069e-07	CITED1, DHH, GATA6, BRCA1, GATA3, GLI3, AQP1, NOS1, ZFP366, PDGFRB, SLC34A2, CAR2, TGFB2, TGFB3, CAV1, MMP2, IGFBP2, APOA2, APOA1, SMAD6, AGTR1A, AGTR1B, TGFBR2, KRT19, MMP14, GHRL, TEK	2104	75	18082	3.09388	0.000838	1.23287e-05	1.16844e-05
GOTERM_BP_DIRECT	GO:0045893	positive regulation of transcription, DNA-templated	4.65707	1.53699e-07	SPI1, IKZF1, FGF1, ETS1, TNF, FGF7, SOX17, SOX18, MYC, MYB, SOX8, PITX2, SOX6, SOX7, OSR2, MEF2C, WNT5A, F2R, EBF1, EBF2, EBF3, SOX11, SOX10, AR, SFRP1, SMO, AGTR2, ZFPM2, BLM, GATA6, PDGFB, GATA5, GATA3, WNT6, PRDM16, FZD1, EGR1, NFE2, EGR2, JUN, AFAP1L2, TGFB1, FZD2, FOXF2, FZD4, TGFB3, FOXF1, NR2F2, IGF1, INHBA, POU2F2, SMARCA1, GDF6, COL1A1, BMP4, NR4A1, IL6, DAB2, BMP2, NR4A3, FEV, CDK2, SNA…	2104	576	18082	1.64124	0.000887832	1.28729e-05	1.22001e-05
GOTERM_BP_DIRECT	GO:0009952	anterior/posterior pattern specification	1.43946	2.73567e-07	IFITM1, LRP5, BARX1, PCSK5, GLI3, GLI2, HOXC5, HOXA3, HOXA2, HOXC4, HOXA1, MSX1, HOXA7, CER1, HOXA5, HOXA4, TCF15, WNT5A, NR2F2, SFRP1, ARC, VANGL2, SFRP2, HOXB9, SMO, ALDH1A2, HOXB4, HOXB2, HOXD3, HOXD9, HOXB7, HOXD8, HOXB6, HOXB5	2104	112	18082	2.60893	0.0015797	2.25849e-05	2.14047e-05
GOTERM_BP_DIRECT	GO:0001501	skeletal system development	1.39712	2.83732e-07	CDKN1C, FOXC2, FOXC1, WFIKKN2, NPR3, PTH1R, HAPLN3, FGFRL1, GLI2, LGALS3, CLEC3B, GJA5, SH3PXD2B, HOXC4, HOXA5, NKX3-2, EDN1, TGFB2, TGFB1, FST, NOG, SOX11, MMP9, TBX3, BMP5, COL1A1, BMP4, VCAN, COL3A1, COL1A2, COL5A2, EPHA2, FBN1	2104	107	18082	2.65052	0.00163835	2.30942e-05	2.18874e-05
GOTERM_BP_DIRECT	GO:0045669	positive regulation of osteoblast differentiation	1.05843	2.9624e-07	FBN2, IFITM1, GDPD2, CYR61, GLI3, NPPC, GJA1, PDLIM7, CTHRC1, GDF10, MEF2C, JAG1, IFI204, WNT7B, SOX11, IGF1, NPNT, BMP6, BMP4, BMP2, SFRP2, TMEM119, ID4, DDR2, LTF	2104	68	18082	3.1596	0.00171051	2.37729e-05	2.25305e-05
GOTERM_BP_DIRECT	GO:0007599	hemostasis	0.84674	3.00297e-07	FGB, FGA, VWF, F10, SERPIND1, SERPINC1, F12, PROS1, F2R, FGG, F13A1, PLG, F2, TFPI, KNG1, TSPAN32, GP9, PROC, SERPING1, ANXA8	2104	46	18082	3.73657	0.00173391	2.37729e-05	2.25305e-05
GOTERM_BP_DIRECT	GO:0010811	positive regulation of cell-substrate adhesion	0.804403	3.15489e-07	VIT, COL26A1, EGFL6, ECM2, FOXF1, NDNF, PTN, NPNT, NID1, THBS1, FBLN2, CYR61, SMOC2, EGFLAM, CCDC80, ABI3BP, COL8A1, ITGA5, DBN1	2104	42	18082	3.88781	0.00182155	2.4638e-05	2.33504e-05
GOTERM_BP_DIRECT	GO:0035987	endodermal cell differentiation	0.635055	3.64224e-07	COL11A1, MMP2, COL12A1, GATA6, FN1, LAMB1, INHBA, MMP8, MMP9, MMP14, COL4A2, COL6A1, COL8A1, ITGA7, ITGA5	2104	27	18082	4.7745	0.00210264	2.80647e-05	2.65981e-05
GOTERM_BP_DIRECT	GO:0032496	response to lipopolysaccharide	2.07451	4.13742e-07	SPARC, CITED1, NCF2, HMGB2, ADM, CXCL1, TNF, CXCL2, MPO, LOXL1, CXCL5, TRIM6, EDNRA, EDNRB, CCR7, CTSG, LGALS9, JUNB, PTGIR, EDN1, UGT1A1, SLC11A1, F2R, FOS, TNFRSF1B, DCN, REN1, S100A8, PTGER2, PALM3, C5AR1, MGST1, NOD2, PTGS2, CNR1, TBXA2R, PCK1, ELANE, JUN, ACE, VCAM1, KCNJ8, IL10RA, P2RX7, CPS1, TRPV4, GJB6, PF4, FGF10	2104	197	18082	2.13762	0.00238816	3.14607e-05	2.98167e-05
GOTERM_BP_DIRECT	GO:0006898	receptor-mediated endocytosis	0.973751	4.28987e-07	IFITM3, MSR1, CUBN, AMN, SCARA5, LRP1, APOA1, LDLRAD3, LRP2, ARHGAP27, SIGLECH, TGFBR2, PLD2, FCGR1, MARCO, DAB2, MRC1, APOE, CD36, CD14, FCGR2B, PLA2R1, SCARF1	2104	60	18082	3.29441	0.00247604	3.21963e-05	3.05138e-05
GOTERM_BP_DIRECT	GO:0007059	chromosome segregation	1.22777	4.91411e-07	TOP2A, CDCA2, RGS14, BRCA1, KIF11, SKA3, PMF1, SKA1, DSN1, SGOL1, PTTG1, NEK2, OIP5, BUB1, CENPW, SPAG5, ESCO2, KNSTRN, NDC80, CENPE, CENPF, ESPL1, CENPH, STAG3, INCENP, NEK10, BIRC5, KIF2C, CENPN	2104	89	18082	2.80033	0.00283584	3.62105e-05	3.43182e-05
GOTERM_BP_DIRECT	GO:0042474	middle ear morphogenesis	0.592718	4.95004e-07	OSR2, EDN1, PRRX1, OSR1, NOG, PRRX2, MYC, GSC, SIX2, HOXA2, GAS1, MSX1, NKX3-2, FGFR1	2104	24	18082	5.01323	0.00285654	3.62105e-05	3.43182e-05
GOTERM_BP_DIRECT	GO:0071560	cellular response to transforming growth factor beta stimulus	0.973751	5.97676e-07	ACVRL1, CX3CR1, MEF2C, EDN1, POSTN, TGFB1, CAV1, SERPINE1, WNT5A, AKR1C18, ZFP36L1, COL1A1, CLEC3B, DAB2, SFRP1, COL4A2, ID1, PDE3A, NOX4, SOX6, WNT2, DBN1, SOX5	2104	61	18082	3.2404	0.00344801	4.31746e-05	4.09184e-05
GOTERM_BP_DIRECT	GO:0048839	inner ear development	1.01609	6.75756e-07	PDGFRB, C1QB, TGFB2, JAG1, TGFB1, SPARC, IFI204, TGFB3, HPCA, LIN7A, IGF1, MYO7A, GLI3, PHOX2B, POU3F4, BMP2, MAF, BMPER, GJB6, C1QTNF5, CDH23, HOXA1, IGFBP7, FREM2	2104	66	18082	3.12513	0.00389758	4.82123e-05	4.56928e-05
GOTERM_BP_DIRECT	GO:0030336	negative regulation of cell migration	1.35478	7.45548e-07	ACVRL1, CX3CR1, ROBO4, IFITM1, SERPINE1, PDGFB, THY1, PTN, ARHGAP4, CNN2, WNT11, DPYSL3, CYP1B1, SLIT2, SRGAP3, EGFL7, TIE1, NOG, TPM1, ARAP3, SULF1, KLF4, PODN, BST2, SFRP1, TMEFF2, SFRP2, DLC1, BCL2, PLXNB3, DPEP1, ENG	2104	106	18082	2.59445	0.00429926	5.2543e-05	4.97972e-05
GOTERM_BP_DIRECT	GO:0042730	fibrinolysis	0.465707	7.65883e-07	FGB, FGA, ANXA2, TMPRSS6, PLAU, F12, PROS1, FGG, SERPING1, PLG, F2	2104	15	18082	6.30234	0.00441626	5.33258e-05	5.05391e-05
GOTERM_BP_DIRECT	GO:0050731	positive regulation of peptidyl-tyrosine phosphorylation	1.31245	7.77241e-07	NRP1, ITGB3, LRRK1, PDGFB, TREM2, NOD2, CD3E, THBS4, ICAM1, FGF7, RELN, NTF3, CD36, LYN, PDGFRA, TGFB1, CAV2, HGF, IGF2, OSM, LIF, VEGFC, IGF1, IL6, CD4, KITL, HCLS1, CSPG4, ITGA5, AGRN, FGF10	2104	101	18082	2.6378	0.0044816	5.34723e-05	5.06779e-05
GOTERM_BP_DIRECT	GO:0007568	aging	1.86283	9.19071e-07	CDKN1C, CD86, LRP1, ITGB2, ADM, PTH1R, ADRA1A, MPO, AURKB, CTGF, CASP7, EDNRB, CNR1, TIMP2, CCL2, DMD, MADCAM1, TIMP1, APOE, PCK1, CTSC, IGFBP1, JUN, TGFB1, TRPC6, VCAM1, TGFB3, SERPINF1, IGFBP2, DNMT3A, FOS, TNFRSF1B, AGTR1A, DCN, TGFBR2, IL6, COL3A1, GJB6, KRT14, RGN, SERPING1, NOX4, IFI27L2A, CRYAB	2104	173	18082	2.18578	0.00529723	6.2486e-05	5.92206e-05
GOTERM_BP_DIRECT	GO:0045165	cell fate commitment	1.05843	9.8474e-07	WNT2B, TGFB1I1, GATA5, WNT6, WNT11, CASP3, HEY2, KDR, HOXA2, SOX8, SOX6, WNT2, SOX5, TEAD4, MEF2C, WNT7B, WNT5A, BMP4, GAP43, BMP2, TAL1, TLX1, SPRY2, GAS1, FGFR2	2104	72	18082	2.98406	0.00567465	6.61706e-05	6.27127e-05
GOTERM_BP_DIRECT	GO:0009611	response to wounding	0.931414	9.96166e-07	NRP1, TGFB2, TGFB1, SERPINE2, F2R, PDGFB, ADM, GLI1, F2, GRIN2C, KLK8, ZFP36L1, SULF2, AURKA, IL6, ZFP36, FABP5, MDK, MYC, CASP3, CCL2, ID3	2104	58	18082	3.25983	0.00574031	6.61706e-05	6.27127e-05
GOTERM_BP_DIRECT	GO:0051216	cartilage development	1.1431	1.05328e-06	DLX2, COL11A1, CHSY1, HOXA3, HOXC4, TIMP1, MSX1, SOX6, SOX5, EDN1, PRRX1, LUM, NOG, WNT5A, PRRX2, SULF1, BMP6, BMP5, SULF2, TGFBR2, BMP4, BMP2, SFRP2, EVC, MGP, COL9A1, HOXD3	2104	82	18082	2.82977	0.00606844	6.91697e-05	6.5555e-05
GOTERM_BP_DIRECT	GO:0042475	odontogenesis of dentin-containing tooth	0.973751	1.12958e-06	PDGFRA, LAMA5, DLX1, CAR2, DLX2, FOXC1, BCL11B, FST, WNT7B, TNC, ADM, GLI3, GLI2, BMP4, WNT6, BMP2, SMO, HAND2, HAND1, MSX1, PITX2, NKX2-3, FGF10	2104	63	18082	3.13753	0.00650657	7.33464e-05	6.95134e-05
GOTERM_BP_DIRECT	GO:0043406	positive regulation of MAP kinase activity	0.889077	1.1858e-06	PDGFRB, MEF2C, EDN1, TGFB1, FLT1, HTR2B, PDGFB, MST1R, FGF1, TNF, PIK3R6, KITL, ERBB2, KIT, FGF18, NEK10, TNFSF11, NOX4, AJUBA, FGFR1, EZH2	2104	54	18082	3.34215	0.00682934	7.53051e-05	7.13698e-05
GOTERM_BP_DIRECT	GO:0003151	outflow tract morphogenesis	0.889077	1.1858e-06	FZD1, RYR1, MEF2C, TGFB2, JUN, FZD2, PLXND1, NOG, SOX11, THBS1, TBX3, TBX2, TGFBR2, BMP4, HEYL, WNT11, SFRP2, SOX17, GJA5, HEY2, ZFPM2	2104	54	18082	3.34215	0.00682934	7.53051e-05	7.13698e-05
GOTERM_BP_DIRECT	GO:0007267	cell-cell signaling	1.31245	1.23016e-06	WNT2B, DHH, ADRA1B, BARX1, ADRA1A, WISP1, CYR61, WISP2, CTGF, GJC1, PANX1, WNT6, GJA1, WNT11, GJA4, STAB1, CCL3, WNT2, FZD1, CCR1, NFE2, FGFBP1, EDN1, FZD2, WNT5A, ADRA2B, GREM1, PYY, FJX1, FGFR2, FGF10	2104	103	18082	2.58658	0.00708391	7.72729e-05	7.32348e-05
GOTERM_BP_DIRECT	GO:0007596	blood coagulation	1.1431	1.76059e-06	SERPINE2, SERPINC1, PROS1, PDGFB, F13A1, PLG, TFPI, KNG1, TSPAN32, APOH, ANXA8, FGB, FGA, NFE2, VWF, F10, SERPIND1, F12, F2R, FGG, F2, GP9, PROC, MMRN1, CDK2, SERPING1, GAS6	2104	84	18082	2.76239	0.0101229	0.000109403	0.000103686
GOTERM_BP_DIRECT	GO:0010718	positive regulation of epithelial to mesenchymal transition	0.677392	1.95497e-06	CRB2, WWTR1, TGFB2, TGFB1, TGFB3, ZFP703, TGFB1I1, TWIST1, TGFBR2, COL1A1, DAB2, BMP2, RGCC, GLIPR2, SNAI1, EZH2	2104	34	18082	4.04429	0.0112342	0.000120189	0.000113908
GOTERM_BP_DIRECT	GO:0019934	cGMP-mediated signaling	0.338696	2.05087e-06	EDNRB, PDE2A, PDE3A, MRVI1, APOE, CD36, PRKG1, PDE9A	2104	8	18082	8.59411	0.011782	0.000124757	0.000118238
GOTERM_BP_DIRECT	GO:0000070	mitotic sister chromatid segregation	0.550381	2.3355e-06	SPAG5, PLK1, CDCA8, CENPA, KNSTRN, NDC80, CIT, DSN1, KIF18B, ESPL1, NUSAP1, NEK2, MAD2L1	2104	23	18082	4.85754	0.0134062	0.000140592	0.000133245
GOTERM_BP_DIRECT	GO:0042127	regulation of cell proliferation	2.20152	2.49021e-06	SPARC, SERPINE1, TNC, BRCA1, FOXM1, BRCA2, TNF, CXCL2, GLI3, CXCL5, PLAU, PITX2, JUNB, ANXA1, PLA2G4A, TNFRSF1B, TGFBR2, FGR, HCK, SFRP2, TAL1, BTK, YAP1, LAMA5, PTGER2, TCF7, CDCA7, PTGS2, PTGS1, CNN2, NKX2-3, TCFL5, EGLN3, TGFB2, TGFB1, JAG1, FANCA, ADAM33, IGF1, BMX, KLF4, TBX3, FA2H, IL6, FES, SPRY2, GHRL, FGFR2, PLCD1, PF4, FGFR1, EZH2	2104	227	18082	1.96869	0.0142879	0.00014836	0.000140607
GOTERM_BP_DIRECT	GO:0043066	negative regulation of apoptotic process	4.36071	3.81814e-06	HHIP, MPL, AQP1, LGALS3, EDNRA, EDNRB, CLEC5A, KDR, SOX8, IER3, PDGFRB, KCNH8, HGF, OSR1, WNT5A, SOX10, SFRP1, SMO, DPEP1, CARD14, CSF1R, TWIST2, GATA6, TWIST1, HIGD1A, PLAC8, SOCS3, MICAL1, FIGNL1, TGFB2, JUN, STIL, BCL11B, PLK1, FN1, IGF1, SMAD6, BMP4, IL6, DAB2, PROC, NR4A3, KITL, ID1, ALB, BCL2, PDE3A, CDK1, SNAI2, FLT4, KIF14, FHL2, HTR2B, GLI3, CYR61, GLI2, HK1, CASP3, FFAR4, CTSH, TIMP1, N…	2104	566	18082	1.56395	0.0218234	0.000225153	0.000213387
GOTERM_BP_DIRECT	GO:0071456	cellular response to hypoxia	1.27011	3.90288e-06	EPAS1, GATA6, MPL, TWIST1, NDNF, PTN, SLC2A4, PTGS2, HIGD1A, ICAM1, ZFP36L1, AQP1, CCNB1, PMAIP1, PCK1, EDN1, PTGIS, TRPC6, DNMT3A, S100B, FABP1, CCNA2, SFRP1, RGCC, FNDC1, BCL2, ADAM8, MGARP, KCNK2, KCNK3	2104	103	18082	2.50314	0.0223023	0.000227826	0.00021592
GOTERM_BP_DIRECT	GO:0034446	substrate adhesion-dependent cell spreading	0.719729	4.28705e-06	LAMA5, FZD4, ITGB3, KIF14, FN1, LAMB1, LAMC1, MERTK, ANTXR1, SFRP1, AXL, ITGA8, TYRO3, ITGB7, TEK, FERMT3, EPHB3	2104	40	18082	3.6525	0.0244705	0.000247749	0.000234802
GOTERM_BP_DIRECT	GO:0008045	motor neuron axon guidance	0.592718	4.73079e-06	NRP1, EPHA4, EGR2, SEMA3A, NOG, CXCR4, CXCL12, ERBB2, SLIT1, HOXA2, HOXA1, SLIT2, EPHA3, PLXNA4	2104	28	18082	4.29705	0.026969	0.000270686	0.00025654
GOTERM_BP_DIRECT	GO:0048557	embryonic digestive tract morphogenesis	0.508044	5.93718e-06	PDGFRA, HLX, FOXF1, SIX2, TCF7, RBPMS2, TCF21, SOX11, PITX2, FGFR2, GLI3, FGF10	2104	21	18082	4.91092	0.0337291	0.000336382	0.000318804
GOTERM_BP_DIRECT	GO:0048844	artery morphogenesis	0.550381	7.1804e-06	NRP1, NOTCH3, FOXC2, FOXC1, PRRX1, PRRX2, WNT11, GJA5, ANGPTL3, HOXA1, APOE, STRA6, ENG	2104	25	18082	4.46894	0.0406465	0.000402869	0.000381816
GOTERM_BP_DIRECT	GO:0051145	smooth muscle cell differentiation	0.465707	8.00962e-06	BMP4, MYOCD, MEF2C, TMEM204, FOXF1, WNT7B, NTF3, GATA6, TBX18, FGF10, NFATC4	2104	18	18082	5.25195	0.0452328	0.000444487	0.000421259
GOTERM_BP_DIRECT	GO:0048146	positive regulation of fibroblast proliferation	0.931414	8.07599e-06	PDGFRB, TGIF1, PDGFRA, JUN, TGFB1, ANXA2, ITGB3, SPHK1, SERPINE1, WNT5A, FN1, PDGFB, IGF1, CDC6, AQP1, CCNA2, CCNB1, MYC, GAS6, WNT2, DDR2, FGF10	2104	65	18082	2.90877	0.045599	0.000444487	0.000421259
GOTERM_BP_DIRECT	GO:0030097	hemopoiesis	1.10076	9.61775e-06	CSF1R, FLT3, EPAS1, CRIP2, IKZF1, BRCA2, GATA2, CNN2, KDR, SOX6, CD34, LYN, PDGFRB, TGFB2, ANGPT2, HBB-BT, HBB-BS, SFRP1, GFI1B, MELK, TAL1, KIT, BCL2, TACC3, HOXB4, TEK	2104	86	18082	2.59822	0.0540648	0.000524349	0.000496947
GOTERM_BP_DIRECT	GO:0030178	negative regulation of Wnt signaling pathway	0.84674	9.7328e-06	LRP1, LECT2, APCDD1, BARX1, NKD1, DKK2, HIC1, NKD2, NFATC4, DKK3, SFRP1, SFRP2, SOX17, WIF1, GSC, GRB10, TAX1BP3, TRABD2B, CER1, MDFI	2104	56	18082	3.06932	0.0546936	0.000525662	0.000498192
GOTERM_BP_DIRECT	GO:0001656	metanephros development	0.677392	1.03515e-05	IRX1, OSR2, FOXC2, IRX3, OSR1, GLI3, BMP4, WT1, SIX2, ITGA8, BCL2, CTSH, ID3, SPRY1, SLIT2, FBN1	2104	38	18082	3.61857	0.0580676	0.000553903	0.000524957
GOTERM_BP_DIRECT	GO:0034375	high-density lipoprotein particle remodeling	0.381033	1.0611e-05	SCARB1, APOM, LIPC, LIPG, APOA2, APOC3, APOA1, APOE, PLTP	2104	12	18082	6.44558	0.0594791	0.000562578	0.000533179
GOTERM_BP_DIRECT	GO:0050715	positive regulation of cytokine secretion	0.635055	1.14496e-05	CLEC4N, HTR2B, TNF, AGTR1A, P2RX7, FGR, PANX1, C1QTNF3, IL1A, RGCC, CLEC5A, CD36, AGTR2, CD14, CLEC4E	2104	34	18082	3.79152	0.0640259	0.000601519	0.000570085
GOTERM_BP_DIRECT	GO:0000122	negative regulation of transcription from RNA polymerase II promoter	5.24979	1.17292e-05	SPI1, PRDM5, WWC2, IKZF1, TNF, ZFP36, EDNRB, SOX17, SOX18, MYC, MYB, HOXA2, HOXA7, SOX6, HMGN2, JUNB, OSR2, MEF2C, OSR1, FST, ARID5B, SOX11, HIC1, MAF, SMO, HOXB4, TIMELESS, TAGLN3, ZFPM2, AJUBA, DLX1, NOTCH3, DLX2, EPAS1, TCF7, TWIST2, GATA6, TWIST1, AEBP1, GATA3, GATA2, ZFP57, PRDM16, MSC, ELANE, WWTR1, EGR1, JUN, TGFB1, FOXF1, BCL11A, CAV1, PDE2A, PLK1, NR2F1, NR2F2, BMP6, NFATC4, BMP4, BMP2, …	2104	729	18082	1.46182	0.065537	0.000610656	0.000578744
GOTERM_BP_DIRECT	GO:0032967	positive regulation of collagen biosynthetic process	0.550381	1.19241e-05	PDGFRB, TGFB1, TGFB3, SERPINF2, F2R, PDGFB, F2, LTBP1, CTGF, BMP4, RGCC, CCL2, ENG	2104	26	18082	4.29705	0.0665893	0.000615264	0.000583111
GOTERM_BP_DIRECT	GO:0001937	negative regulation of endothelial cell proliferation	0.592718	1.20842e-05	ACVRL1, SPARC, CAV2, CAV1, NR2F2, SULF1, THBS1, TNF, GJA1, RGCC, APOH, ATOH8, GHRL, APOE	2104	30	18082	4.01058	0.0674525	0.000618007	0.000585711
GOTERM_BP_DIRECT	GO:0001974	blood vessel remodeling	0.719729	1.2858e-05	ACVRL1, FOXC2, MEF2C, TGFB2, FOXC1, JAG1, ANGPT2, EPAS1, LIF, BGN, IGF1, ADRA1B, AXL, HOXA3, FLNA, FGF10, TGM2	2104	43	18082	3.39767	0.0716132	0.000651811	0.000617748
GOTERM_BP_DIRECT	GO:0010976	positive regulation of neuron projection development	1.4818	1.49545e-05	SERPINE2, AVIL, STMN2, NDNF, PTN, CXCL5, HTR7, RELN, CNR1, ADAMTS1, P2RY2, DPYSL3, DMD, QK, FAM150B, SCARF1, LYN, DYNLT1B, SPHK1, SERPINF1, WNT5A, DYNLT1A, LIF, NGF, EPOR, RGMA, BMP4, IL6, GPRC5B, FES, PTK7, PLXNB3, DBN1, EPHA3, FGFR1	2104	138	18082	2.17966	0.0827938	0.000751498	0.000712226
GOTERM_BP_DIRECT	GO:0060536	cartilage morphogenesis	0.296359	1.55035e-05	MEF2C, HAND2, HAND1, SNAI1, SNAI2, MSX1, HOXA5	2104	7	18082	8.59411	0.0856988	0.000767294	0.000727197
GOTERM_BP_DIRECT	GO:0001701	in utero embryonic development	2.58256	1.55344e-05	ACVRL1, HBA-A2, HBA-A1, GLI3, GLI2, AMOT, TMEM100, GJA1, EDNRA, SOX18, MYC, MYB, SOX8, PITX2, SOX6, JUNB, IFITM5, SOX5, PDGFRB, TEAD4, PDGFRA, CUBN, SLC34A2, FOXD3, EDN1, NOG, TPM1, SOX10, TGFBR2, RAD51B, AR, RCN1, SMO, HAND2, HAND1, ZFPM2, EGFL8, FOXC1, GATA6, TWIST1, GATA3, ASCL2, CCNB2, CCNB1, MSX1, SLIT2, STIL, TGFB3, FOXF1, WNT7B, TIE1, RARRES2, GDF1, NR2F2, TBX3, KLF2, DAB2, BMP2, APBA2, FG…	2104	299	18082	1.75331	0.0858623	0.000767294	0.000727197
GOTERM_BP_DIRECT	GO:0071773	cellular response to BMP stimulus	0.635055	1.70467e-05	ACVRL1, NOG, GATA6, GATA5, GATA3, ADAMTS12, BMP6, PHOX2B, TMEM100, BMP4, HEYL, SFRP1, BMP2, CER1, ADAMTS7	2104	35	18082	3.68319	0.0938166	0.000834854	0.000791226
GOTERM_BP_DIRECT	GO:0001558	regulation of cell growth	0.84674	1.72654e-05	IGFBP1, IGFBP4, IGFBP3, HTRA3, HTRA4, IGFBP2, KIF14, CRIM1, HTRA1, WFDC1, WISP1, FBLN5, CYR61, WISP2, CTGF, IGFBPL1, NOV, PTTG1, IGFBP7, IGFBP6	2104	58	18082	2.96348	0.0949612	0.000838459	0.000794643
GOTERM_BP_DIRECT	GO:0042476	odontogenesis	0.550381	1.91944e-05	OSR2, OSR1, TWIST1, LAMB1, INHBA, AQP3, BMP4, SDC1, GAS1, ID3, MSX1, PITX2, FGFR2	2104	27	18082	4.1379	0.104995	0.00091673	0.000868824
GOTERM_BP_DIRECT	GO:0070328	triglyceride homeostasis	0.550381	1.91944e-05	SCARB1, PLA2G12B, APOC4, APOC3, APOA1, APOA4, GIP, LIPC, APOC2, ANGPTL3, APOE, ANGPTL4, GPIHBP1	2104	27	18082	4.1379	0.104995	0.00091673	0.000868824
GOTERM_BP_DIRECT	GO:0002548	monocyte chemotaxis	0.677392	2.14593e-05	CCL24, CCL12, CCL11, FLT1, ANXA1, GM13304, PDGFB, LGALS3, CCL9, CCL7, CCL6, CCL4, CCL3, CCL2, TNFSF11, CCL21A	2104	40	18082	3.43764	0.116633	0.0010165	0.00096338
GOTERM_BP_DIRECT	GO:0048484	enteric nervous system development	0.381033	2.47623e-05	EDNRA, EDNRB, HLX, KIF26A, TLX2, NTF3, SOX8, SOX10, PHOX2B	2104	13	18082	5.94977	0.133335	0.00113982	0.00108026
GOTERM_BP_DIRECT	GO:0048846	axon extension involved in axon guidance	0.338696	2.48517e-05	NRP1, NRP2, SMO, SEMA3A, SLIT1, SLIT3, SLIT2, SEMA3F	2104	10	18082	6.87529	0.133783	0.00113982	0.00108026
GOTERM_BP_DIRECT	GO:0003149	membranous septum morphogenesis	0.338696	2.48517e-05	FZD1, BMP4, TGFB2, VANGL2, FZD2, NOG, FGFR2, TGFBR2	2104	10	18082	6.87529	0.133783	0.00113982	0.00108026
GOTERM_BP_DIRECT	GO:0021612	facial nerve structural organization	0.338696	2.48517e-05	NRP1, EGR2, NRP2, SEMA3A, HOXB2, HOXA1, SEMA3F, PLXNA4	2104	10	18082	6.87529	0.133783	0.00113982	0.00108026
GOTERM_BP_DIRECT	GO:0051384	response to glucocorticoid	0.973751	2.77067e-05	SPARC, ANXA3, DUSP1, WNT7B, IGFBP2, APOA2, ADM, GPR83, S100B, PTGS2, TNF, AIF1, CXCL2, BMP6, HSD11B2, IL6, MDK, PAPPA, BCL2, SDC1, ACSBG1, CRYAA, AGXT	2104	75	18082	2.63553	0.147958	0.00126077	0.00119488
GOTERM_BP_DIRECT	GO:0090090	negative regulation of canonical Wnt signaling pathway	1.18544	2.83214e-05	RGS19, GLI1, NKD1, GLI3, NKD2, WNT11, SOX17, TMEM88, WIF1, GPC3, ANKRD6, CTHRC1, EGR1, WWTR1, CAV1, NOG, WNT5A, SOX10, DKK2, DKK3, GREM1, SFRP4, DAB2, SFRP1, BMP2, LATS2, SFRP2, SNAI2	2104	102	18082	2.35917	0.150979	0.00127867	0.00121185
GOTERM_BP_DIRECT	GO:0071300	cellular response to retinoic acid	0.889077	2.95353e-05	LYN, YAP1, MEF2C, WNT7B, SERPINF1, OSR1, TNC, KLF4, AQP1, COL1A1, CYP26B1, BRINP1, PTK7, MYC, ALDH1A2, HOXA2, CCL2, HOXA1, PCK1, BRINP3, EPHA3	2104	65	18082	2.77656	0.156915	0.00132314	0.00125399
GOTERM_BP_DIRECT	GO:0007159	leukocyte cell-cell adhesion	0.508044	3.01098e-05	NT5E, PTPRC, ITGAM, VCAM1, ITGB2, MSN, OLR1, APOA4, ITGA5, ITGAL, FERMT3, ICAM1	2104	24	18082	4.29705	0.159709	0.00132828	0.00125886
GOTERM_BP_DIRECT	GO:0030574	collagen catabolic process	0.508044	3.01098e-05	MRC2, MMP11, ADAMTS2, MMP14, MMP16, CTSK, MMP2, COL23A1, MMP19, PRTN3, MMP8, MMP9	2104	24	18082	4.29705	0.159709	0.00132828	0.00125886
GOTERM_BP_DIRECT	GO:0045666	positive regulation of neuron differentiation	1.18544	3.41822e-05	GATA2, GLI2, BRINP1, TIMP2, BNIP2, ECT2, BRINP3, RGS6, TGIF1, MEF2C, TRPC6, IRX3, MMD2, SOX11, NGF, GDF6, ADRA2B, BMP6, PHOX2B, BMP4, HEYL, IL6, GPRC5B, BMP2, CXCL12, RARB, HOXD3, FGFR1	2104	103	18082	2.33626	0.179254	0.00149651	0.0014183
GOTERM_BP_DIRECT	GO:0008283	cell proliferation	1.98984	5.1982e-05	YAP1, FOXC2, CSF1R, FOXC1, LRP1, NCF1, UHRF1, MCM10, LRP2, MKI67, FGF1, BRCA2, TNF, AURKB, ZFP36L1, GLI2, FGF5, GBX2, MYC, SIX2, PDPN, LIPG, FAM83D, CD34, BUB1, TSPAN1, E2F8, RHBDF1, MAP4K1, TGFB1, HGF, IGF1, TNFRSF1B, MELK, NASP, FGF18, BCL2, CKS2, TACC3, ID4, HOXB4, CDK1, CSPG4, LMX1B, TGFBI, FBXL7, CFB	2104	220	18082	1.83601	0.259487	0.00225868	0.00214064
GOTERM_BP_DIRECT	GO:0010466	negative regulation of peptidase activity	1.27011	5.47972e-05	ITIH5, ECM1, ITIH3, SERPINE2, SERPINC1, PZP, SERPINE1, PAPLN, WFIKKN2, WFDC1, TFPI, KNG1, WFDC2, SERPINA1C, GPC3, TIMP2, TIMP3, TIMP1, SPINK2, SERPIND1, SERPINF2, SERPINA3M, NGF, SERPINB8, STFA2, NGP, CD109, BIRC5, SERPING1, PI16	2104	117	18082	2.20362	0.271438	0.00236323	0.00223974
GOTERM_BP_DIRECT	GO:0006260	DNA replication	1.31245	5.67982e-05	PIF1, BLM, 2810417H13RIK, DSCC1, MCM10, BRCA1, CHTF18, CHAF1B, CDC45, CHAF1A, ORC1, POLE, RFC5, GINS1, CDT1, RRM2, LIG1, CDC6, TICRR, FAM111A, DBF4, NFIA, NASP, NFIB, POLE2, MCM3, RBMS1, MCM5, MCM6, DNA2, DTL	2104	123	18082	2.16599	0.279814	0.00243138	0.00230432
GOTERM_BP_DIRECT	GO:0001658	branching involved in ureteric bud morphogenesis	0.719729	6.19876e-05	LAMA5, CITED1, TCF21, NPNT, GLI3, ADAMTS16, GREM1, BMP4, WNT6, BMP2, WT1, MYC, BCL2, GPC3, TIMELESS, DCHS1, FAT4	2104	48	18082	3.04375	0.301093	0.00263402	0.00249637
GOTERM_BP_DIRECT	GO:0032355	response to estradiol	1.1431	6.61241e-05	ADCYAP1R1, DHH, OPRL1, WFDC1, PTN, PTGS2, TFPI, CXCL2, ETS1, CTGF, MYC, PDGFRB, POSTN, TGFB1, ANXA1, DUSP1, IGFBP2, DNMT3A, NR2F2, MAPK15, COL1A1, FCGR1, CD4, ALDH1A2, CRYAB, FGF10, EZH2	2104	101	18082	2.29743	0.317603	0.00278928	0.00264351
GOTERM_BP_DIRECT	GO:0060707	trophoblast giant cell differentiation	0.42337	6.95459e-05	SOCS3, HAND1, GJB5, SNAI1, LIF, PLG, NR2F2, E2F7, MDFI, E2F8	2104	18	18082	4.7745	0.330966	0.00291236	0.00276017
GOTERM_BP_DIRECT	GO:0014911	positive regulation of smooth muscle cell migration	0.635055	7.06393e-05	PDGFRB, FGA, EGR1, POSTN, ITGB3, PDGFB, IGF1, PLAU, P2RY2, MYC, BCL2, HAS2, CYP1B1, NOX4, RAPGEF3	2104	39	18082	3.30543	0.33518	0.00293687	0.00278339
GOTERM_BP_DIRECT	GO:0050919	negative chemotaxis	0.508044	7.46735e-05	NRP2, SEMA3D, ITGB3, SEMA3A, SEMA4C, WNT5A, SEMA3B, SLIT1, APOA1, SLIT3, SLIT2, SEMA3F	2104	26	18082	3.96651	0.350501	0.00308242	0.00292133
GOTERM_BP_DIRECT	GO:0030595	leukocyte chemotaxis	0.465707	7.61913e-05	CCR1, GM13304, GPR183, CCL4, S1PR1, CCL3, IL16, CORO1A, CXCL2, S100A9, PF4	2104	22	18082	4.29705	0.356174	0.00312276	0.00295957
GOTERM_BP_DIRECT	GO:0010977	negative regulation of neuron projection development	0.84674	8.00201e-05	LRP1, SEMA3A, STMN2, NR2F1, LPAR1, PTPRG, RGMA, DAB2, MAG, EFEMP1, LGALS1, TRPV4, DPYSL3, PMP22, TNR, FLNA, CSPG4, VIM, EPHA3, RUNX1T1	2104	64	18082	2.68566	0.370264	0.00323382	0.00306483
GOTERM_BP_DIRECT	GO:0003007	heart morphogenesis	0.84674	8.00201e-05	FOXC2, TGFB2, FOXC1, COL11A1, HTR2B, EPOR, TBX3, TBX2, FLRT2, SMO, COL5A1, HAND2, DLC1, ALDH1A2, HAND1, FLNA, DCHS1, MSX1, FAT4, EPHB4	2104	64	18082	2.68566	0.370264	0.00323382	0.00306483
GOTERM_BP_DIRECT	GO:0001755	neural crest cell migration	0.719729	8.21843e-05	SEMA5A, SEMA5B, LAMA5, NRP2, SEMA6A, SEMA3D, SEMA4C, SEMA3B, HTR2B, SEMA3F, SOX10, ZEB2, EDNRB, GBX2, SMO, KITL, SOX8	2104	49	18082	2.98163	0.378092	0.00329822	0.00312586
GOTERM_BP_DIRECT	GO:0007179	transforming growth factor beta receptor signaling pathway	0.931414	8.86694e-05	ACVRL1, TGFB2, JUN, TGFB1, CITED1, HPGD, TGFB3, WFIKKN2, LTBP4, PDGFB, FOS, SMAD6, LTBP1, TGFBR2, CLDN5, CDH5, COL3A1, BMP2, COL1A2, ZYX, CCL2, ENG	2104	75	18082	2.52094	0.40097	0.00353393	0.00334926
GOTERM_BP_DIRECT	GO:0007166	cell surface receptor signaling pathway	1.9475	9.61378e-05	ADCYAP1R1, CALCRL, TNFRSF13B, LAMA1, GPR88, GPR83, CD3G, PTH1R, CD3E, ITGAL, TSPAN11, MCHR1, FGFRL1, CRHR2, CD79B, PROKR1, CYSLTR1, UPK1B, CXCR3, TSPAN6, ERBB2, BTLA, TSPAN4, CD37, CD36, CLEC1B, TSPAN1, FZD1, CD53, EDN1, SEMA6A, FZD2, ANXA1, FZD4, F2, OSMR, TNFRSF1B, FCGR1, CD4, P2RX5, FCGR3, SMO, TSPAN18, CD9, AGTR2, FCGR2B	2104	219	18082	1.80515	0.426276	0.00378394	0.0035862
GOTERM_BP_DIRECT	GO:0006508	proteolysis	4.19136	9.62519e-05	PRSS1, TPSB2, MCPT8, MCPT4, 1810009J06RIK, HP, PLAT, CAPN6, PLAU, CPA3, HGF, PCOLCE, PRSS57, ADAM19, REN1, PAPPA, ADAM12, DPEP2, DPEP1, PRTN3, ADAM8, MASP1, CFB, TRABD2B, DHH, HTRA3, CFI, HTRA4, HTRA1, AEBP1, ADAMTS12, KLK8, ADAMTS10, ADAMTS16, ADAMTS15, ADAMTS19, NAALAD2, ELANE, CPA4, GGT5, NAPSA, ACE, PROC, TINAGL1, CPZ, PCSK5, PRSS23, ADAMTS4, MMP23, ADAMTS5, CASP7, ADAMTS2, CASP12, ADAMTS1, C…	2104	582	18082	1.46188	0.426654	0.00378394	0.0035862
GOTERM_BP_DIRECT	GO:0060445	branching involved in salivary gland morphogenesis	0.381033	9.97948e-05	LAMA5, IL6, FGF7, LAMA1, PDGFB, FGFR2, FGF10, FGFR1, TGM2	2104	15	18082	5.15646	0.438275	0.00389672	0.00369308
GOTERM_BP_DIRECT	GO:0051781	positive regulation of cell division	0.677392	0.000104574	TGFB2, TGFB1, TGFB3, IGF2, HTR2B, PDGFB, VEGFC, PTN, FGF1, THBS4, FGF5, IL1A, FGF7, TAL1, MDK, FGFR2	2104	45	18082	3.05568	0.453578	0.00405592	0.00384397
GOTERM_BP_DIRECT	GO:0070098	chemokine-mediated signaling pathway	0.762066	0.000107915	CCR1, CCL24, CCL12, CCL11, GM13304, CXCL1, CXCL2, CXCL5, CCL9, CXCL12, CCL7, CCL6, CCL4, CCL3, CCL2, ACKR3, CCL21A, PF4	2104	55	18082	2.81262	0.464027	0.00415759	0.00394032
GOTERM_BP_DIRECT	GO:0000187	activation of MAPK activity	0.931414	0.000109255	TGFB3, HGF, ITGA1, WNT5A, GAB1, LPAR1, IGF1, FGF1, IQGAP3, ADRA2B, THBS1, TNF, P2RX7, BMP2, C1QTNF2, PTPRC, KIT, NTF3, PLCE1, GHRL, CSPG4, FGF10	2104	76	18082	2.48777	0.468163	0.00418135	0.00396284
GOTERM_BP_DIRECT	GO:0090190	positive regulation of branching involved in ureteric bud morphogenesis	0.465707	0.000120782	GREM1, BMP4, TGFB1, WNT2B, SMO, NOG, SOX8, AGTR2, HOXB7, AGTR1A, AGTR1B	2104	23	18082	4.11022	0.502441	0.0045921	0.00435212
GOTERM_BP_DIRECT	GO:0010595	positive regulation of endothelial cell migration	0.635055	0.00013181	FOXC2, SPARC, ANXA3, ITGB3, FLT4, WNT5A, GATA3, FGF1, THBS1, ETS1, BMP4, ATOH8, KDR, TEK, SASH1	2104	41	18082	3.14419	0.533166	0.00497864	0.00471846
GOTERM_BP_DIRECT	GO:0002062	chondrocyte differentiation	0.677392	0.000138628	OSR2, MEF2C, TGFB1, WNT2B, OSR1, PTH1R, HSPG2, GLI2, BMP4, BMP2, NOV, NFIB, MUSTN1, SIX2, TGFBI, FGFR1	2104	46	18082	2.98925	0.551204	0.00520215	0.0049303
GOTERM_BP_DIRECT	GO:0051591	response to cAMP	0.719729	0.000140436	JUN, SPARC, CITED1, DUSP1, PAX4, PYGM, FOS, COL1A1, REN1, CDK2, PDE3A, SDC1, FOSB, MMP19, TEK, AGXT, JUNB	2104	51	18082	2.8647	0.55587	0.005236	0.00496238
GOTERM_BP_DIRECT	GO:0007399	nervous system development	2.92125	0.00014806	SEMA5A, PRDM8, SEMA5B, NRP1, NRP2, SERPINE2, AVIL, BZW2, CHRDL1, ELAVL3, CDC20, DPYSL5, INSC, DPYSL3, STMN1, HOXA1, EPHB2, EPHB1, CER1, EPHB3, EPHA5, EPHA4, MEF2C, SEMA6A, SOX11, FOS, GFRA2, CIT, GAP43, DOK4, ITGA8, DBN1, GAS7, NUMBL, ZFP423, CHRNA3, NRN1, SEMA3D, SDC2, SEMA3A, SEMA3B, CXCR4, NDNF, BHLHE22, GATA3, NDRG2, ASCL2, PCDH18, IGSF9, THBS4, EFNB2, NTF3, ERBB2, ATOH8, SLIT1, GNG8, SLIT3, …	2104	377	18082	1.57293	0.575015	0.00548487	0.00519824
GOTERM_BP_DIRECT	GO:0032835	glomerulus development	0.296359	0.000150996	HEYL, WWTR1, VANGL2, WT1, BCL2, TCF21, PLCE1	2104	9	18082	6.68431	0.582165	0.00555798	0.00526753
GOTERM_BP_DIRECT	GO:0060070	canonical Wnt signaling pathway	1.01609	0.000160011	FZD1, RYR2, TCF7L1, WNT2B, FZD2, FZD4, WNT7B, TCF7, WNT5A, LRP5, GLI1, KLF4, SFRP4, SFRP1, WNT11, CDH3, HOXB9, SOX17, PTK7, MYC, SNAI2, SDC1, RSPO1, WNT2	2104	89	18082	2.31751	0.603381	0.00585049	0.00554475
GOTERM_BP_DIRECT	GO:0008584	male gonad development	1.18544	0.000160967	WNT2B, GATA6, HMGB2, GATA3, KDR, SOX8, PITX2, SPINK2, TGFB2, BIK, AHSG, WNT5A, FANCA, ARID5B, INHBA, REN1, MAS1, ASPM, AR, SFRP1, MMP14, SFRP2, NASP, KITL, WT1, KIT, BCL2, COL9A3	2104	112	18082	2.14853	0.605566	0.00585049	0.00554475
GOTERM_BP_DIRECT	GO:0002053	positive regulation of mesenchymal cell proliferation	0.592718	0.000164079	PRRX1, FOXF1, PRRX2, WNT5A, LRP5, TBX18, TGFBR2, SMO, MYC, KDR, GAS1, WNT2, FGFR2, FGFR1	2104	37	18082	3.25182	0.612597	0.00592632	0.00561662
GOTERM_BP_DIRECT	GO:2000352	negative regulation of endothelial cell apoptotic process	0.508044	0.000166375	SEMA5A, FGB, FGA, FGG, SERPINE1, KDR, NDNF, ANGPTL4, TEK, GATA3, GAS6, ICAM1	2104	28	18082	3.68319	0.617703	0.00597192	0.00565984
GOTERM_BP_DIRECT	GO:0035556	intracellular signal transduction	3.04826	0.000176189	GUCY1B3, CTGF, NRGN, PREX2, ZFP36, CASP3, GSG2, PLCE1, RGS6, TNS1, PDGFRB, MAP4K1, GUCY1A3, GUCY1A2, EDN1, PRKCH, KSR1, DUSP1, NFAM1, HUNK, HMHA1, NRG2, VAV1, CIT, TIAM2, ZAP70, DEPDC1B, LATS2, DEPDC1A, RASA3, PRKD3, KIT, ARHGEF3, BTK, LCP2, PRKCQ, AGTR2, MYZAP, ZP3, PLCB2, DGKI, RAPGEF3, ARHGEF6, RGS14, PKN3, ADCY4, RASAL1, ADCY2, ADCY1, NOD2, RASGRP2, ADCY7, ADCY5, SOCS3, INPP5D, SH3BP5, ECT2, …	2104	400	18082	1.54694	0.638787	0.00628517	0.00595672
GOTERM_BP_DIRECT	GO:0010759	positive regulation of macrophage chemotaxis	0.381033	0.000179237	TRPV4, RARRES2, C5AR1, C3AR1, CCL2, CCR7, THBS1, CCL21A, CMKLR1	2104	16	18082	4.83418	0.645093	0.0063159	0.00598584
GOTERM_BP_DIRECT	GO:0007051	spindle organization	0.381033	0.000179237	ASPM, SPAG5, RGS14, CEP72, AUNIP, KIF11, KNSTRN, AURKB, AURKA	2104	16	18082	4.83418	0.645093	0.0063159	0.00598584
GOTERM_BP_DIRECT	GO:0003148	outflow tract septum morphogenesis	0.465707	0.000185548	BMP4, TGFB2, VANGL2, GATA6, RARB, SMAD6, ZFPM2, FGFR2, TGFBR2, TBX2, ENG	2104	24	18082	3.93897	0.657807	0.00649867	0.00615906
GOTERM_BP_DIRECT	GO:0061098	positive regulation of protein tyrosine kinase activity	0.42337	0.000193276	GREM1, CSF1R, GPRC5B, RELN, ACE, DOK7, PDGFB, GHRL, AGRN, GAS6	2104	20	18082	4.29705	0.672757	0.00672857	0.00637695
GOTERM_BP_DIRECT	GO:0010629	negative regulation of gene expression	2.20152	0.000195087	ACVRL1, SERPINE1, HMGB2, CD3E, TNF, CTGF, TRIM6, GJA1, MYC, HEY2, CD36, LGALS9, CD34, TGIF1, MEF2C, SERPINF1, NOG, SOX11, UPK3B, SFRP1, SFRP2, SMO, HAND2, MYADM, CRYAA, CRYAB, ENG, PDGFB, GATA3, IQGAP3, AIF1, CRHR2, CCNB1, CCL3, SLIT3, SLIT2, CCR1, TGFB2, ACE, TGFB1, BCL11A, IGF1, KLF4, BMP4, HEYL, REST, BMP2, ID1, CD28, ID3, FGFR1, EZH2	2104	265	18082	1.68639	0.676164	0.00675094	0.00639815
GOTERM_BP_DIRECT	GO:0006955	immune response	2.24386	0.000201573	MCPT8, TINAGL1, NRROS, MCPT4, LST1, CXCL1, TNF, CXCL2, CXCL5, TNFSF11, CCR7, ENPP3, H2-OA, CD36, SBSPON, SECTM1A, TNFRSF1B, VAV1, IL1A, ZAP70, LCP2, TLR7, TLR6, LTB, CLEC4E, GM933, CCL12, CCL11, THBS1, FYB, CCL9, CCL7, CCL6, HRH2, CCL4, CCL3, CCL2, NKX2-3, CCR1, CCL24, CMA1, GM13304, PRG2, OSM, LIF, SMAD6, BMP6, IL6, CD4, CXCL12, CD28, FCGR2B, PF4	2104	272	18082	1.67459	0.688079	0.00693387	0.00657151
GOTERM_BP_DIRECT	GO:0060412	ventricular septum morphogenesis	0.592718	0.00022305	FZD1, TGFB2, FZD2, NOG, SOX11, TBX3, FGFRL1, TGFBR2, HEYL, WNT11, GJA5, HEY2, ZFPM2, PITX2	2104	38	18082	3.16625	0.724495	0.00762724	0.00722866
GOTERM_BP_DIRECT	GO:0010862	positive regulation of pathway-restricted SMAD protein phosphorylation	0.677392	0.000236426	GDF10, ACVRL1, TGFB2, TGFB1, TGFB3, GDF1, INHBA, GDF6, INHBC, BMP6, BMP5, BMP4, DAB2, BMP2, LGALS9, ENG	2104	48	18082	2.8647	0.744993	0.00803708	0.00761708
GOTERM_BP_DIRECT	GO:1902287	semaphorin-plexin signaling pathway involved in axon guidance	0.338696	0.000258436	NRP1, NRP2, PLXND1, SEMA3A, PLXNB3, PLXNC1, SEMA3F, PLXNA4	2104	13	18082	5.28868	0.775459	0.00853431	0.00808832
GOTERM_BP_DIRECT	GO:0030195	negative regulation of blood coagulation	0.338696	0.000258436	PROC, SERPINE2, PROS1, APOH, APOE, TPSAB1, CD34, KNG1	2104	13	18082	5.28868	0.775459	0.00853431	0.00808832
GOTERM_BP_DIRECT	GO:0002523	leukocyte migration involved in inflammatory response	0.338696	0.000258436	AOC3, ITGAM, ITGB2, CCL2, ADAM8, S100A9, S100A8, ELANE	2104	13	18082	5.28868	0.775459	0.00853431	0.00808832
GOTERM_BP_DIRECT	GO:0001945	lymph vessel development	0.338696	0.000258436	EFNB2, FOXC2, FOXC1, SOX18, TMEM204, FLT4, KDR, NR2F2	2104	13	18082	5.28868	0.775459	0.00853431	0.00808832
GOTERM_BP_DIRECT	GO:0033690	positive regulation of osteoblast proliferation	0.338696	0.000258436	BMP2, ITGB3, TMEM119, LRP5, SOX8, CYR61, LTF, CTHRC1	2104	13	18082	5.28868	0.775459	0.00853431	0.00808832
GOTERM_BP_DIRECT	GO:0071526	semaphorin-plexin signaling pathway	0.550381	0.000277749	SEMA5A, SEMA5B, NRP1, SEMA6A, PLXND1, SEMA3D, SEMA3A, SEMA4C, SEMA3B, PLXNB3, FLNA, PLXNC1, PLXNA4	2104	34	18082	3.28598	0.799178	0.00906844	0.00859454
GOTERM_BP_DIRECT	GO:0050900	leukocyte migration	0.550381	0.000277749	FPR1, MSN, FPR2, TNF, MMP9, ICAM1, PODXL, MADCAM1, ITGB7, TEK, CD34, NKX2-3, ELANE	2104	34	18082	3.28598	0.799178	0.00906844	0.00859454
GOTERM_BP_DIRECT	GO:0048701	embryonic cranial skeleton morphogenesis	0.592718	0.000299255	PDGFRA, FOXC2, DLX2, PRRX1, PRRX2, TWIST2, TWIST1, TGFBR2, BMP4, MMP14, MMP16, SIX2, GAS1, FGFR2	2104	39	18082	3.08506	0.822654	0.00966142	0.00915653
GOTERM_BP_DIRECT	GO:0030168	platelet activation	0.592718	0.000299255	FGB, FGA, VWF, ITGB3, F2R, FGG, RASGRP2, MERTK, F2, ADRA2B, VAV1, AXL, TYRO3, PF4	2104	39	18082	3.08506	0.822654	0.00966142	0.00915653
GOTERM_BP_DIRECT	GO:0090280	positive regulation of calcium ion import	0.42337	0.000303442	PDGFRB, LGALS3, CCL12, CXCL12, SERPINE1, HRC, PDGFB, CCL2, CXCR4, ZP3	2104	21	18082	4.09243	0.826895	0.009709	0.00920162
GOTERM_BP_DIRECT	GO:0002042	cell migration involved in sprouting angiogenesis	0.381033	0.000304089	GREM1, EFNB2, NRP1, NR4A1, MMRN2, KDR, CLEC14A, SLIT2, EPHB4	2104	17	18082	4.54982	0.827541	0.009709	0.00920162
GOTERM_BP_DIRECT	GO:0048535	lymph node development	0.508044	0.000339435	TGFB1, RIPK3, FLT3, TLX1, TNFSF11, CCR7, CD248, LTB, IKZF1, IL7R, NKX2-3, CCL21A	2104	30	18082	3.43764	0.859413	0.0107436	0.0101822
GOTERM_BP_DIRECT	GO:0048245	eosinophil chemotaxis	0.296359	0.000340211	LGALS3, CCL24, CCL11, CCL7, CCL3, CCL2, CCR3	2104	10	18082	6.01587	0.860042	0.0107436	0.0101822
GOTERM_BP_DIRECT	GO:0007200	phospholipase C-activating G-protein coupled receptor signaling pathway	0.762066	0.000347378	F2R, C5AR1, NPR3, FPR1, FPR2, PTH1R, ADRA1B, ADRA1A, AGTR1A, GNG13, CYSLTR1, EDNRB, P2RY2, LTB4R1, C3AR1, PLCE1, NMUR1, TGM2	2104	60	18082	2.57823	0.865723	0.0109103	0.0103402
GOTERM_BP_DIRECT	GO:1901166	neural crest cell migration involved in autonomic nervous system development	0.254022	0.0003632	NRP1, NRP2, SEMA3A, FN1, SEMA3F, PHOX2B	2104	7	18082	7.36638	0.877459	0.0111645	0.0105811
GOTERM_BP_DIRECT	GO:0002320	lymphoid progenitor cell differentiation	0.254022	0.0003632	BMP4, SPI1, FLT3, KIT, BCL2, BATF	2104	7	18082	7.36638	0.877459	0.0111645	0.0105811
GOTERM_BP_DIRECT	GO:0048645	organ formation	0.254022	0.0003632	AR, TLX1, GATA6, HOXA3, NKX3-2, FGF10	2104	7	18082	7.36638	0.877459	0.0111645	0.0105811
GOTERM_BP_DIRECT	GO:0060449	bud elongation involved in lung branching	0.254022	0.0003632	YAP1, BMP4, SPRY2, SPRY1, FGFR2, FGF10	2104	7	18082	7.36638	0.877459	0.0111645	0.0105811
GOTERM_BP_DIRECT	GO:0070373	negative regulation of ERK1 and ERK2 cascade	0.804403	0.000394325	LYN, RGS14, DYNLT1B, DUSP1, CAV1, DYNLT1A, LIF, FBLN1, IGF1, NDRG2, KLF4, DUSP6, DAB2, NLRP6, TBC1D10C, SPRY2, TIMP3, DMD, SPRY1	2104	66	18082	2.47406	0.897639	0.0120572	0.0114271
GOTERM_BP_DIRECT	GO:0048843	negative regulation of axon extension involved in axon guidance	0.465707	0.000403718	SEMA5A, SEMA5B, NRP1, SEMA6A, SEMA3D, SEMA3A, SEMA4C, WNT5A, SEMA3B, SLIT1, SEMA3F	2104	26	18082	3.63597	0.90305	0.0122794	0.0116377
GOTERM_BP_DIRECT	GO:0031668	cellular response to extracellular stimulus	0.42337	0.000460769	P2RX7, LYN, GSDMD, LDHA, SFRP2, AXL, FOS, AIF1, ASGR1, BMP6	2104	22	18082	3.90641	0.930289	0.0139413	0.0132127
GOTERM_BP_DIRECT	GO:0030194	positive regulation of blood coagulation	0.338696	0.000465004	TBXA2R, F12, SERPINE1, F2R, CD36, F2, THBS1, S100A9	2104	14	18082	4.91092	0.931975	0.0139961	0.0132647
GOTERM_BP_DIRECT	GO:0051482	positive regulation of cytosolic calcium ion concentration involved in phospholipase C-activating G-protein coupled signaling pathway	0.508044	0.000471257	GPR17, EDNRA, EDN1, F2R, S1PR1, LPAR1, GPR20, A630033H20RIK, LPAR4, AGTR1A, PLCD1, TGM2	2104	31	18082	3.32675	0.934391	0.0140381	0.0133045
GOTERM_BP_DIRECT	GO:0001837	epithelial to mesenchymal transition	0.508044	0.000471257	TGFB2, BMP2, TGFB1, WNT11, NOG, SNAI1, LOXL3, FLNA, SNAI2, MSX1, FAM83D, FGFR2	2104	31	18082	3.32675	0.934391	0.0140381	0.0133045
GOTERM_BP_DIRECT	GO:0030855	epithelial cell differentiation	0.804403	0.000481364	FZD1, TAGLN, FZD2, TGFB1I1, GATA6, TCF21, BARX1, CRHR2, LGALS3, UPK1B, PTER, COL4A1, WT1, CDHR2, KRT14, CDK1, ID3, FGFR2, FGF10	2104	67	18082	2.43713	0.938115	0.0142657	0.0135202
GOTERM_BP_DIRECT	GO:0032331	negative regulation of chondrocyte differentiation	0.381033	0.000491723	GREM1, BMP4, EFEMP1, SNAI2, RARB, ADAMTS12, NKX3-2, ADAMTS7, GLI2	2104	18	18082	4.29705	0.941712	0.0144374	0.0136829
GOTERM_BP_DIRECT	GO:0021915	neural tube development	0.677392	0.000492156	TRIM71, STIL, TGFB1, TCF7, NOG, WNT5A, GLI3, ZFP36L1, GLI2, CECR2, SFRP1, FAM212A, SFRP2, ALDH1A2, DCHS1, EPHA2	2104	51	18082	2.69619	0.941858	0.0144374	0.0136829
GOTERM_BP_DIRECT	GO:0030513	positive regulation of BMP signaling pathway	0.550381	0.000507936	CRB2, ACVRL1, ZFP423, GATA6, SOX11, SULF1, CYR61, BMP4, GPC3, KDR, KCP, MSX1, ENG	2104	36	18082	3.10343	0.946928	0.0147506	0.0139797
GOTERM_BP_DIRECT	GO:0048754	branching morphogenesis of an epithelial tube	0.550381	0.000507936	SEMA5A, LAMA5, IGF1, GLI3, GLI2, BMP4, MMP14, MGP, TIMELESS, KDR, SPRY2, SLIT2, FGF10	2104	36	18082	3.10343	0.946928	0.0147506	0.0139797
GOTERM_BP_DIRECT	GO:0030217	T cell differentiation	0.592718	0.000519507	EGR1, TGFB1, BCL11A, RHOH, IKZF1, GATA3, VAV1, LFNG, CD4, PTPRC, TBX21, KIT, BCL2, IL7R	2104	41	18082	2.93457	0.950363	0.0150112	0.0142267
GOTERM_BP_DIRECT	GO:0051897	positive regulation of protein kinase B signaling	1.01609	0.000612761	SEMA5A, TGFB1, F10, IGF2, AKR1C18, IGF1, MST1R, GATA3, THBS1, TNF, C1QTNF3, IL6, AXL, CD28, SPRY2, TNFSF11, NOX4, HCLS1, ADAM8, TNFAIP8L3, TEK, ZP3, GAS6, CCL21A	2104	97	18082	2.12638	0.971051	0.0176176	0.016697
GOTERM_BP_DIRECT	GO:0060976	coronary vasculature development	0.550381	0.000672988	PLXND1, LRP1, PDE2A, LRP2, KIF7, SMAD6, LTBP1, PCSK5, BMP4, PROKR1, PTK7, WT1, GPC3	2104	37	18082	3.01955	0.979565	0.0187465	0.0177668
GOTERM_BP_DIRECT	GO:0000910	cytokinesis	0.550381	0.000672988	PLK1, KIF23, KLHL13, RHOC, BRCA2, AURKC, CIT, PSTPIP1, PRC1, INCENP, BIRC5, KIF20A, ECT2	2104	37	18082	3.01955	0.979565	0.0187465	0.0177668
GOTERM_BP_DIRECT	GO:0072091	regulation of stem cell proliferation	0.296359	0.000674731	YAP1, SOX17, SOX18, MPL, HMGB2, ZFP36L1, FGFR1	2104	11	18082	5.46898	0.97977	0.0187465	0.0177668
GOTERM_BP_DIRECT	GO:0032060	bleb assembly	0.296359	0.000674731	P2RX7, LPAR1, PMP22, EMP1, EMP2, EMP3, MYLK	2104	11	18082	5.46898	0.97977	0.0187465	0.0177668
GOTERM_BP_DIRECT	GO:0048762	mesenchymal cell differentiation	0.296359	0.000674731	WWTR1, FOXC1, BMP2, NOG, PLAUR, FGFR2, FGFR1	2104	11	18082	5.46898	0.97977	0.0187465	0.0177668
GOTERM_BP_DIRECT	GO:0021785	branchiomotor neuron axon guidance	0.296359	0.000674731	NRP1, NRP2, PLXND1, SEMA3A, PLXNC1, SEMA3F, PLXNA4	2104	11	18082	5.46898	0.97977	0.0187465	0.0177668
GOTERM_BP_DIRECT	GO:0003184	pulmonary valve morphogenesis	0.296359	0.000674731	BMP4, HEYL, TGFB2, JAG1, HEY2, SMAD6, STRA6	2104	11	18082	5.46898	0.97977	0.0187465	0.0177668
GOTERM_BP_DIRECT	GO:0060045	positive regulation of cardiac muscle cell proliferation	0.42337	0.000679333	MEF2C, CCNB1, HEY2, GATA6, CDK1, ZFPM2, WNT2, FGFR2, FGFR1, TBX2	2104	23	18082	3.73657	0.980301	0.018784	0.0178024
GOTERM_BP_DIRECT	GO:0007010	cytoskeleton organization	1.05843	0.00071626	CCL12, TAGLN, CCL11, AVIL, THY1, LSP1, TSPAN32, FTCD, CNN2, CCL7, ABLIM3, CCL3, CCL2, CAP2, CCL24, WTIP, FMNL3, ARHGAP10, HCK, FMNL1, ARC, DLC1, DOCK2, AJUBA, DOCK1	2104	104	18082	2.06589	0.984089	0.0197108	0.0186807
GOTERM_BP_DIRECT	GO:0043065	positive regulation of apoptotic process	2.54022	0.000730252	TOP2A, STEAP3, ADM, TNF, CYR61, IFIT2, CASP12, ADAMTSL4, CASP3, CYP1B1, PHLDA1, HOXA5, TGM2, PDGFRB, SPINK2, ANXA1, DUSP1, IGFBP3, MMP2, PLA2G4A, UNC5C, NGF, MMP9, DUSP6, SFRP4, SFRP1, LATS2, SFRP2, MELK, ALDH1A2, RARB, IRF5, GATA6, LPAR1, PTN, PTGS2, WNT11, CNR1, INPP5D, NTF3, PMAIP1, BMF, SLIT2, ECT2, TGFB2, JUN, ACE, TGFB1, TGFB3, S100B, NFATC4, P2RX7, BMP4, NR4A1, REST, IL6, BMP2, WT1, ID3, N…	2104	335	18082	1.53924	0.985326	0.0200006	0.0189554
GOTERM_BP_DIRECT	GO:0001523	retinoid metabolic process	0.381033	0.000763152	RBP2, ALDH1A2, APOC2, RARRES2, APOA2, APOC3, APOA1, APOA4, APOE	2104	19	18082	4.07089	0.987868	0.0205128	0.0194408
GOTERM_BP_DIRECT	GO:0042310	vasoconstriction	0.381033	0.000763152	EDNRA, EDN1, EDNRB, ACE, HTR7, CAV1, HTR2B, BDKRB2, AGTR1A	2104	19	18082	4.07089	0.987868	0.0205128	0.0194408
GOTERM_BP_DIRECT	GO:0031589	cell-substrate adhesion	0.381033	0.000763152	VWF, ITGB3, ITGA5, GAS6, SMAD6, CORO1A, EPHB1, SORBS3, MYO1G	2104	19	18082	4.07089	0.987868	0.0205128	0.0194408
GOTERM_BP_DIRECT	GO:0032753	positive regulation of interleukin-4 production	0.381033	0.000763152	SASH3, IL33, PRG2, CD28, NLRP3, PRKCQ, GATA3, ZP3, CD3E	2104	19	18082	4.07089	0.987868	0.0205128	0.0194408
GOTERM_BP_DIRECT	GO:0050918	positive chemotaxis	0.338696	0.000784563	SEMA5A, BMP4, LGALS3, NRP1, FGF7, PLXNB3, CORO1A, FGF10	2104	15	18082	4.58352	0.989281	0.0208719	0.0197812
GOTERM_BP_DIRECT	GO:0050921	positive regulation of chemotaxis	0.338696	0.000784563	PDGFRB, TGFB1, RARRES2, CXCR3, FN1, PDGFB, THBS1, CCL21A	2104	15	18082	4.58352	0.989281	0.0208719	0.0197812
GOTERM_BP_DIRECT	GO:0014068	positive regulation of phosphatidylinositol 3-kinase signaling	0.762066	0.000787347	PDGFRB, PRR5, TGFB2, FLT1, HGF, F2R, PDGFB, IGF1, F2, DCN, PLD2, FGR, RELN, ERBB2, CD28, KDR, HCLS1, TEK	2104	64	18082	2.41709	0.989453	0.0208719	0.0197812
GOTERM_BP_DIRECT	GO:0045765	regulation of angiogenesis	0.465707	0.000801761	SP100, ANGPT2, PLXND1, SERPINE1, ID1, VASH2, EMP2, ITGA5, TEK, ETS1, EPHA2	2104	28	18082	3.37626	0.990296	0.0210608	0.0199602
GOTERM_BP_DIRECT	GO:0090023	positive regulation of neutrophil chemotaxis	0.465707	0.000801761	EDNRA, EDN1, SELL, C5AR1, RAC2, C3AR1, CCR7, CXCL1, CXCL2, THBS4, CCL21A	2104	28	18082	3.37626	0.990296	0.0210608	0.0199602
GOTERM_BP_DIRECT	GO:0048286	lung alveolus development	0.635055	0.00082387	MYOCD, ACE, TGFB3, FOXF1, FLT4, LIF, TCF21, IGF1, BMP4, PDPN, KDR, FGFR2, HOXA5, STRA6, FGF10	2104	48	18082	2.68566	0.991461	0.0212607	0.0201496
GOTERM_BP_DIRECT	GO:0050830	defense response to Gram-positive bacterium	0.973751	0.000823989	GSDMD, PGLYRP2, NCF1, LYZ2, C5AR1, HMGB2, ADM, SSC5D, NOD2, TNF, MPO, IL27RA, P2RX7, FGR, HCK, CTSG, CD36, PGLYRP1, MBL1, CAMP, MYO1F, MBL2, EPHA2	2104	93	18082	2.12542	0.991467	0.0212607	0.0201496
GOTERM_BP_DIRECT	GO:0045636	positive regulation of melanocyte differentiation	0.211685	0.000827765	ZEB2, KITL, BCL2, ADAMTS9, ADAMTS20	2104	5	18082	8.59411	0.991651	0.0212607	0.0201496
GOTERM_BP_DIRECT	GO:0072378	blood coagulation, fibrin clot formation	0.211685	0.000827765	FGB, FGA, FGG, F13A1, FBLN1	2104	5	18082	8.59411	0.991651	0.0212607	0.0201496
GOTERM_BP_DIRECT	GO:0042482	positive regulation of odontogenesis	0.211685	0.000827765	EDNRA, BMP2, EDN1, TGFB1, CD34	2104	5	18082	8.59411	0.991651	0.0212607	0.0201496
GOTERM_BP_DIRECT	GO:0048247	lymphocyte chemotaxis	0.508044	0.000864539	CCL24, CCL9, CCL12, CCL11, CCL7, CCL6, GM13304, CCL4, CCL3, CCL2, ADAM8, CCL21A	2104	33	18082	3.12513	0.993251	0.0218065	0.020667
GOTERM_BP_DIRECT	GO:0032147	activation of protein kinase activity	0.508044	0.000864539	TPX2, TGFB2, RIPK3, ITGB3, SLC11A1, CKS2, KIF14, PDGFB, EMP2, CLSPN, ECT2, TGFBR2	2104	33	18082	3.12513	0.993251	0.0218065	0.020667
GOTERM_BP_DIRECT	GO:0019933	cAMP-mediated signaling	0.508044	0.000864539	EPHA5, ADCYAP1R1, KSR1, NPR3, PDE2A, PDE3A, ADCY4, ADCY2, ADM, ADCY1, ADCY7, ADCY5	2104	33	18082	3.12513	0.993251	0.0218065	0.020667
GOTERM_BP_DIRECT	GO:0071310	cellular response to organic substance	0.508044	0.000864539	TRIM71, EGR1, NR4A1, EGR2, TBX21, CASP3, TIMP2, BCL2, TIMP3, CYBA, CD68, IQGAP3	2104	33	18082	3.12513	0.993251	0.0218065	0.020667
GOTERM_BP_DIRECT	GO:0019800	peptide cross-linking via chondroitin 4-sulfate glycosaminoglycan	0.254022	0.000875431	EGFLAM, MAMDC2, BGN, NDNF, PRSS34, DCN	2104	8	18082	6.44558	0.993663	0.0218065	0.020667
GOTERM_BP_DIRECT	GO:0001878	response to yeast	0.254022	0.000875431	CD86, IL6, NCF1, PTX3, MPO, ELANE	2104	8	18082	6.44558	0.993663	0.0218065	0.020667
GOTERM_BP_DIRECT	GO:0038063	collagen-activated tyrosine kinase receptor signaling pathway	0.254022	0.000875431	COL1A1, COL4A2, COL4A1, COL4A6, COL4A5, DDR2	2104	8	18082	6.44558	0.993663	0.0218065	0.020667
GOTERM_BP_DIRECT	GO:0043491	protein kinase B signaling	0.550381	0.000880652	CCL12, TGFB1, IGF1, MERTK, TNF, ZFP36L1, TMEM100, AXL, CCL3, TYRO3, CCL2, GAS6, EPHA2	2104	38	18082	2.94009	0.993851	0.0218424	0.020701
GOTERM_BP_DIRECT	GO:0060425	lung morphogenesis	0.42337	0.000975604	BMP4, FOXF1, WNT7B, NOG, ID1, SPRY2, TCF21, SOX11, TGFBR2, FGF10	2104	24	18082	3.58088	0.99645	0.0239916	0.0227378
GOTERM_BP_DIRECT	GO:0045987	positive regulation of smooth muscle contraction	0.42337	0.000975604	MYOCD, EDN1, TBXA2R, SPHK1, F2R, NPNT, PTGS2, ADRA1B, ADRA1A, PTGS1	2104	24	18082	3.58088	0.99645	0.0239916	0.0227378
GOTERM_BP_DIRECT	GO:0007219	Notch signaling pathway	1.18544	0.00102417	NOTCH3, FOXC2, FOXC1, ZFP423, MAML2, HP, KCNA5, NRARP, DTX4, CDH6, TMEM100, NEURL1B, HEY2, S1PR3, SUSD5, JAG1, TGFB1, GZMB, DLK1, TBX2, TGFBR2, HEYL, KRT19, BMP2, SNAI2, HOXD3, FAT4, AGXT	2104	125	18082	1.92508	0.997319	0.0250791	0.0237686
GOTERM_BP_DIRECT	GO:0045600	positive regulation of fat cell differentiation	0.635055	0.00103163	RARRES2, DKKL1, LRP5, IGF1, ZFP36L1, ZFP36, SFRP1, BMP2, SFRP2, WIF1, SH3PXD2B, SNAI2, CCDC3, ZBTB7C, CMKLR1	2104	49	18082	2.63085	0.997433	0.0251552	0.0238406
GOTERM_BP_DIRECT	GO:0090102	cochlea development	0.465707	0.00109741	CCNA2, GABRB2, CECR2, VANGL2, HEY2, DCHS1, HOXA1, GATA3, GATA2, KCNK2, KCNK3	2104	29	18082	3.25983	0.998245	0.0265352	0.0251485
GOTERM_BP_DIRECT	GO:0045840	positive regulation of mitotic nuclear division	0.465707	0.00109741	PDGFRB, IL1A, EDN1, RGCC, IGF2, CD28, NUSAP1, LRP5, PDGFB, IGF1, TNF	2104	29	18082	3.25983	0.998245	0.0265352	0.0251485
GOTERM_BP_DIRECT	GO:0044130	negative regulation of growth of symbiont in host	0.381033	0.00114307	CTSG, NOD2, CD36, MPO, TNF, MBL1, CAMP, ELANE, MBL2	2104	20	18082	3.86735	0.998653	0.0274605	0.0260255
GOTERM_BP_DIRECT	GO:0007080	mitotic metaphase plate congression	0.508044	0.00114518	CENPE, KIF18A, CCNB1, KIFC1, CDCA5, CHMP4C, KIFC5B, KIF14, CDCA8, KIF2C, SPDL1, KIF22	2104	34	18082	3.03321	0.998669	0.0274605	0.0260255
GOTERM_BP_DIRECT	GO:0001823	mesonephros development	0.296359	0.00121685	REN1, BMP4, OSR2, WT1, OSR1, GATA3, FGF10	2104	12	18082	5.01323	0.999121	0.028939	0.0274267
GOTERM_BP_DIRECT	GO:0051310	metaphase plate congression	0.296359	0.00121685	CENPE, CENPF, KIF2C, KIF22, FAM83D, GEM, NDC80	2104	12	18082	5.01323	0.999121	0.028939	0.0274267
GOTERM_BP_DIRECT	GO:0007018	microtubule-based movement	0.84674	0.00125266	KIFC5B, KIF14, DNAH7A, KIF23, DNAH9, KIF11, KIF22, KIF7, KIF6, KIF15, KIF4, CENPE, KIF18A, KIF18B, KIF26A, KIFC1, KIF26B, KIF2C, KIF20A, KIF20B	2104	78	18082	2.20362	0.999285	0.0296114	0.028064
GOTERM_BP_DIRECT	GO:2000679	positive regulation of transcription regulatory region DNA binding	0.338696	0.00125537	TRIM6, TGFB1, HAND2, TWIST1, IGF1, LGALS9, GATA3, KLF4	2104	16	18082	4.29705	0.999296	0.0296114	0.028064
GOTERM_BP_DIRECT	GO:0032956	regulation of actin cytoskeleton organization	0.635055	0.00128165	PDGFRB, EPHA5, TGFB2, LRP1, ITGB3, CORO1A, FGR, BST2, IL1A, VANGL2, DLC1, FSCN1, GPM6B, EPHA3, MYO1F	2104	50	18082	2.57823	0.999396	0.0301084	0.028535
GOTERM_BP_DIRECT	GO:0000132	establishment of mitotic spindle orientation	0.42337	0.00136848	GPSM2, DYNLT1B, DYNLT1A, INSC, SPRY2, SPRY1, SPDL1, CENPA, NDC80, FGF10	2104	25	18082	3.43764	0.999634	0.0318888	0.0302224
GOTERM_BP_DIRECT	GO:0048010	vascular endothelial growth factor receptor signaling pathway	0.42337	0.00136848	NRP1, FOXC2, FOXC1, FLT1, FLT4, KDR, VEGFC, CCL2, SULF1, VAV1	2104	25	18082	3.43764	0.999634	0.0318888	0.0302224
GOTERM_BP_DIRECT	GO:0048469	cell maturation	0.592718	0.00138021	EPAS1, PTH1R, GATA3, POU2F2, GATA2, SOX10, REN1, SOX18, AXL, BTK, KDR, SOX8, CCL21A, FGFR1	2104	45	18082	2.67372	0.999658	0.032033	0.030359
GOTERM_BP_DIRECT	GO:0032570	response to progesterone	0.465707	0.00147639	TGFB2, GABRB1, CLDN4, TGFB1, TGFB3, PTGER2, CAV1, CCL2, FOSB, FOS, PTN	2104	30	18082	3.15117	0.999804	0.0341283	0.0323448
GOTERM_BP_DIRECT	GO:0008217	regulation of blood pressure	0.719729	0.00154921	AOC3, GUCY1A3, ACVRL1, EDN1, ACE, NPR3, LRP5, CYBA, PTGS2, PTGS1, ACTA2, REN1, EDNRA, COL1A2, EDNRB, C3AR1, CD34	2104	62	18082	2.35645	0.999872	0.0356688	0.0338049
GOTERM_BP_DIRECT	GO:0048870	cell motility	0.381033	0.00165976	CCDC80, SRPX2, PDPN, FSCN1, CD34, ETS1, IER2, PLD2, EPHA2	2104	21	18082	3.68319	0.999932	0.0379121	0.0359309
GOTERM_BP_DIRECT	GO:0010460	positive regulation of heart rate	0.381033	0.00165976	RYR2, EDN1, HEY2, HRC, ADM, AVPR1A, SCN5A, ADRA1A, CRHR2	2104	21	18082	3.68319	0.999932	0.0379121	0.0359309
GOTERM_BP_DIRECT	GO:0035019	somatic stem cell population maintenance	0.592718	0.00172209	YAP1, TCF7L1, SPI1, NOG, LRP5, LDB2, GATA2, ASCL2, SFRP1, VANGL2, ELF5, KIT, PRDM16, FGF10	2104	46	18082	2.6156	0.999953	0.0390273	0.0369878
GOTERM_BP_DIRECT	GO:0030514	negative regulation of BMP signaling pathway	0.592718	0.00172209	FZD1, TMPRSS6, HTRA3, NOG, WNT5A, HTRA1, SMAD6, CHRDL1, GREM1, SFRP1, SFRP2, BMPER, RBPMS2, CER1	2104	46	18082	2.6156	0.999953	0.0390273	0.0369878
GOTERM_BP_DIRECT	GO:0003094	glomerular filtration	0.254022	0.00178098	EDNRA, MCAM, SULF1, CD34, AQP1, SULF2	2104	9	18082	5.7294	0.999966	0.0397384	0.0376618
GOTERM_BP_DIRECT	GO:0060426	lung vasculature development	0.254022	0.00178098	FOXF1, ID1, LIF, TCF21, IGF1, STRA6	2104	9	18082	5.7294	0.999966	0.0397384	0.0376618
GOTERM_BP_DIRECT	GO:0060539	diaphragm development	0.254022	0.00178098	WT1, TCF21, KCNAB1, MSC, FGFRL1, STRA6	2104	9	18082	5.7294	0.999966	0.0397384	0.0376618
GOTERM_BP_DIRECT	GO:0045198	establishment of epithelial cell apical/basal polarity	0.254022	0.00178098	TCF15, LAMA1, PTK7, FOXF1, WNT5A, MSN	2104	9	18082	5.7294	0.999966	0.0397384	0.0376618
GOTERM_BP_DIRECT	GO:0042632	cholesterol homeostasis	0.719729	0.00185623	SCARB1, G6PC, PLA2G12B, DGAT2, CAV1, LRP5, APOA2, APOC3, APOA1, APOA4, CYP7A1, LIPC, FABP4, LIPG, ANGPTL3, APOE, GPIHBP1	2104	63	18082	2.31904	0.999978	0.0412583	0.0391023
GOTERM_BP_DIRECT	GO:0009954	proximal/distal pattern formation	0.42337	0.00187923	GREM1, DLX1, DLX2, CYP26B1, CHSY1, ALDH1A2, GLI1, HOXD9, GLI3, GLI2	2104	26	18082	3.30543	0.999981	0.0414507	0.0392846
GOTERM_BP_DIRECT	GO:0070371	ERK1 and ERK2 cascade	0.42337	0.00187923	CCL11, HTR2B, TNFSF11, TRF, CTSH, IGF1, IQGAP3, CCR3, ZFP36L1, FGF10	2104	26	18082	3.30543	0.999981	0.0414507	0.0392846
GOTERM_BP_DIRECT	GO:0050732	negative regulation of peptidyl-tyrosine phosphorylation	0.338696	0.00192127	SFRP1, PTPRC, SFRP2, LRRK1, NTF3, PECAM1, IGF1, SAMSN1	2104	17	18082	4.04429	0.999985	0.0416542	0.0394774
GOTERM_BP_DIRECT	GO:0003203	endocardial cushion morphogenesis	0.338696	0.00192127	ACVRL1, HEYL, TGFB2, BMP2, NOG, TWIST1, TBX2, ENG	2104	17	18082	4.04429	0.999985	0.0416542	0.0394774
GOTERM_BP_DIRECT	GO:0014032	neural crest cell development	0.338696	0.00192127	FOXC2, EDNRA, FOXC1, EDN1, ALDH1A2, HAND2, SNAI2, SOX11	2104	17	18082	4.04429	0.999985	0.0416542	0.0394774
GOTERM_BP_DIRECT	GO:0048485	sympathetic nervous system development	0.338696	0.00192127	NRP1, HAND2, ERBB2, SOX11, GATA3, PHOX2B, PLXNA4, PHOX2A	2104	17	18082	4.04429	0.999985	0.0416542	0.0394774
GOTERM_BP_DIRECT	GO:0040007	growth	0.508044	0.0019317	BMP4, CCNB2, TGFB2, BMP2, TGFB1, TGFB3, RFTN1, BCL2, INHBA, GDF6, BMP6, BMP5	2104	36	18082	2.8647	0.999986	0.0416542	0.0394774
GOTERM_BP_DIRECT	GO:0045786	negative regulation of cell cycle	0.508044	0.0019317	BMP4, PLA2G16, NR4A1, BMP2, BRINP1, TGFB1, HPGD, CASP3, INHBA, GATA3, PTGS2, BRINP3	2104	36	18082	2.8647	0.999986	0.0416542	0.0394774
GOTERM_BP_DIRECT	GO:0043552	positive regulation of phosphatidylinositol 3-kinase activity	0.465707	0.00195503	PDGFRB, LYN, FGR, PDGFRA, TGFB1, FLT1, PDGFB, TNFAIP8L3, NOD2, TEK, CCL21A	2104	31	18082	3.04952	0.999988	0.0416904	0.0395117
GOTERM_BP_DIRECT	GO:0070372	regulation of ERK1 and ERK2 cascade	0.465707	0.00195503	LYN, BMP4, ERBB2, NEK10, FN1, FAM83D, EPHB1, FGFR2, CYR61, CRHR2, EPHA2	2104	31	18082	3.04952	0.999988	0.0416904	0.0395117
GOTERM_BP_DIRECT	GO:2000379	positive regulation of reactive oxygen species metabolic process	0.465707	0.00195503	PDGFRB, RIPK3, PLAU, PDGFB, CYP1B1, NOX4, AKR1C18, CD36, F2, THBS1, TGFBR2	2104	31	18082	3.04952	0.999988	0.0416904	0.0395117
GOTERM_BP_DIRECT	GO:0071407	cellular response to organic cyclic compound	0.804403	0.0019885	MSR1, P2RY13, CCL12, MEF2C, TGFB1, SLC16A1, RGS19, FOXF1, CYBA, NOD2, TMEM173, TNF, GLI2, P2RX7, BMP2, CCNB1, LGALS1, CCL3, CYP1B1	2104	75	18082	2.17717	0.99999	0.0422483	0.0400405
GOTERM_BP_DIRECT	GO:0043691	reverse cholesterol transport	0.296359	0.00203835	SCARB1, APOM, LIPG, APOA2, APOA1, APOA4, APOE	2104	13	18082	4.6276	0.999992	0.0425257	0.0403034
GOTERM_BP_DIRECT	GO:0016331	morphogenesis of embryonic epithelium	0.296359	0.00203835	LAMA5, ALDH1A2, TGFB1I1, PCDH8, VEGFC, FGFR2, TBX18	2104	13	18082	4.6276	0.999992	0.0425257	0.0403034
GOTERM_BP_DIRECT	GO:0003198	epithelial to mesenchymal transition involved in endocardial cushion formation	0.296359	0.00203835	TMEM100, BMP4, HEYL, SNAI1, SNAI2, MSX1, ENG	2104	13	18082	4.6276	0.999992	0.0425257	0.0403034
GOTERM_BP_DIRECT	GO:0040037	negative regulation of fibroblast growth factor receptor signaling pathway	0.296359	0.00203835	WNT5A, SPRY2, SPRY1, SULF1, THBS1, FGFRL1, SULF2	2104	13	18082	4.6276	0.999992	0.0425257	0.0403034
GOTERM_BP_DIRECT	GO:0090179	planar cell polarity pathway involved in neural tube closure	0.296359	0.00203835	FZD1, SFRP1, VANGL2, FZD2, SFRP2, PTK7, WNT5A	2104	13	18082	4.6276	0.999992	0.0425257	0.0403034
GOTERM_BP_DIRECT	GO:0042542	response to hydrogen peroxide	0.677392	0.00209687	PDGFRB, JUN, LIG1, DUSP1, MMP2, HP, KCNA5, PLD2, COL1A1, NR4A3, CYP11A1, CASP3, BCL2, SDC1, CRYAA, CRYAB	2104	58	18082	2.37079	0.999995	0.0435893	0.0413114
GOTERM_BP_DIRECT	GO:0032870	cellular response to hormone stimulus	0.592718	0.00213104	JUN, NCF2, DUSP1, AVPR2, IGFBP2, FOS, AVPR1A, AIF1, CACNA1H, FOSB, SLIT3, IGFBP7, SLIT2, JUNB	2104	47	18082	2.55995	0.999996	0.0441408	0.041834
GOTERM_BP_DIRECT	GO:0071363	cellular response to growth factor stimulus	0.719729	0.00221253	TGIF1, TGFB1, ANGPT2, SPARC, TGFB3, PDGFB, TWIST1, HTR3A, TNFRSF1B, KLF4, THBS1, BMP4, SFRP1, BMP2, ERBB2, NOS1, GAS6	2104	64	18082	2.28281	0.999997	0.0453784	0.043007
GOTERM_BP_DIRECT	GO:0042102	positive regulation of T cell proliferation	0.719729	0.00221253	CD86, SASH3, ANXA1, VCAM1, BTNL2, CD3E, ITGAL, AIF1, CORO1A, IL6, CD4, CD1D1, PTPRC, CD28, CCR7, PRKCQ, ZP3	2104	64	18082	2.28281	0.999997	0.0453784	0.043007
GOTERM_BP_DIRECT	GO:0061304	retinal blood vessel morphogenesis	0.211685	0.00225361	LAMA1, COL4A1, FZD4, LRP5, CYP1B1	2104	6	18082	7.16176	0.999998	0.0453784	0.043007
GOTERM_BP_DIRECT	GO:0002693	positive regulation of cellular extravasation	0.211685	0.00225361	PLVAP, PECAM1, CCL2, ADAM8, ICAM1	2104	6	18082	7.16176	0.999998	0.0453784	0.043007
GOTERM_BP_DIRECT	GO:0003150	muscular septum morphogenesis	0.211685	0.00225361	FZD1, BMP4, VANGL2, FZD2, HEY2	2104	6	18082	7.16176	0.999998	0.0453784	0.043007
GOTERM_BP_DIRECT	GO:0034384	high-density lipoprotein particle clearance	0.211685	0.00225361	SCARB1, APOM, APOC2, APOA2, APOE	2104	6	18082	7.16176	0.999998	0.0453784	0.043007
GOTERM_BP_DIRECT	GO:0021637	trigeminal nerve structural organization	0.211685	0.00225361	NRP1, NRP2, SEMA3A, SEMA3F, PLXNA4	2104	6	18082	7.16176	0.999998	0.0453784	0.043007
GOTERM_BP_DIRECT	GO:0001957	intramembranous ossification	0.211685	0.00225361	COL1A1, MN1, CTSK, MMP2, FGF18	2104	6	18082	7.16176	0.999998	0.0453784	0.043007
GOTERM_BP_DIRECT	GO:0002687	positive regulation of leukocyte migration	0.381033	0.0023449	AOC3, CCL12, KITL, ITGB3, PECAM1, CCL2, MADCAM1, ZP3, MMP9	2104	22	18082	3.51577	0.999999	0.0465631	0.0441298
GOTERM_BP_DIRECT	GO:0050718	positive regulation of interleukin-1 beta secretion	0.381033	0.0023449	P2RX7, PANX1, GSDMD, NLRP1A, WNT5A, CCL3, NLRP3, CCR7, NOD2	2104	22	18082	3.51577	0.999999	0.0465631	0.0441298
GOTERM_BP_DIRECT	GO:0035329	hippo signaling	0.381033	0.0023449	YAP1, TEAD4, WWTR1, LATS2, DCHS1, FAT4, WTIP, AJUBA, AMOT	2104	22	18082	3.51577	0.999999	0.0465631	0.0441298
GOTERM_BP_DIRECT	GO:0071385	cellular response to glucocorticoid stimulus	0.381033	0.0023449	REST, ZFP36, EDN1, ANXA1, UGT1A1, FLT3, SSTR4, ZFP36L1, SSTR5	2104	22	18082	3.51577	0.999999	0.0465631	0.0441298
GOTERM_BP_DIRECT	GO:0071277	cellular response to calcium ion	0.635055	0.00235273	MEF2C, EDN1, JUN, WNT5A, AKR1C18, FOS, ADCY1, RASGRP2, MYLK, DPEP1, FOSB, SCN5A, CPNE2, ECT2, JUNB	2104	53	18082	2.43229	0.999999	0.0465631	0.0441298
GOTERM_BP_DIRECT	GO:0030501	positive regulation of bone mineralization	0.508044	0.00246424	FBN2, P2RX7, BMP4, OSR2, MEF2C, BMP2, TGFB1, TGFB3, OSR1, TMEM119, BMP6, GPM6B	2104	37	18082	2.78728	0.999999	0.0486035	0.0460636
GOTERM_BP_DIRECT	GO:0030325	adrenal gland development	0.42337	0.00253143	CDKN1C, PDGFRB, PDGFRA, WNT11, MDK, WT1, ARID5B, APOA1, STRA6, DKK3	2104	27	18082	3.183	1	0.049759	0.0471586
GOTERM_BP_DIRECT	GO:0060349	bone morphogenesis	0.465707	0.00255127	OSR2, CYP26B1, SFRP2, CHSY1, ACTN3, LRP5, HAS2, MSX1, FGFR2, IFITM5, LTF	2104	32	18082	2.95422	1	0.0499789	0.0473671
GOTERM_BP_DIRECT	GO:0042981	regulation of apoptotic process	1.60881	0.002581	ROBO4, NLRP1A, BNC2, LRP5, NOD2, GLI3, BCL2L12, CASP12, MYC, NTF3, PMAIP1, SKP2, GDF10, EGR1, TGFB2, PTGIS, TGFB1, DUSP1, CIDEB, GDF1, INHBA, TRAF1, GDF6, TNFRSF1B, INHBC, BMP6, CIDEC, BMP5, IL6, BMP2, SFRP2, TRAF4, SELL, BCL2, SNAI2, AGTR2, CARD14, UMODL1	2104	199	18082	1.64109	1	0.0503906	0.0477572
GOTERM_BP_DIRECT	GO:0045599	negative regulation of fat cell differentiation	0.592718	0.00261656	WWTR1, JAG1, TGFB1, TGFB1I1, WNT5A, GATA3, GATA2, DLK1, MMP11, ID4, ZFPM2, TRIB2, JDP2, RUNX1T1	2104	48	18082	2.50661	1	0.0505722	0.0479294
GOTERM_BP_DIRECT	GO:0009725	response to hormone	0.592718	0.00261656	LYN, FOXC2, FHL2, ADRA1B, ADRA1A, MMP14, LOX, TIMP2, ANGPTL3, MMP19, HCLS1, GHRL, TIMP1, PITX2	2104	48	18082	2.50661	1	0.0505722	0.0479294
GOTERM_BP_DIRECT	GO:0030218	erythrocyte differentiation	0.592718	0.00261656	LYN, ALAS2, SPI1, EPAS1, IKZF1, GATA3, BMP4, HEPH, TAL1, CASP3, KIT, HCLS1, SOX6, TRIM10	2104	48	18082	2.50661	1	0.0505722	0.0479294
GOTERM_BP_DIRECT	GO:0043547	positive regulation of GTPase activity	1.27011	0.00265533	CCL12, CCL11, THY1, RASGRP2, ICAM1, CCL9, WNT11, CCL7, CCL6, CCL4, ERBB2, CCL3, S1PR1, CCL2, CCR7, ECT2, CCL21A, RGS6, CCL24, CAV2, GM13304, WNT5A, ARHGAP27, VAV1, RGMA, MEX3B, RGN, AGRN, RAPGEF3, EZH2	2104	146	18082	1.76591	1	0.0511505	0.0484775
GOTERM_BP_DIRECT	GO:0060395	SMAD protein signal transduction	0.804403	0.00271413	GDF10, TGFB2, JUN, TGFB1, CITED1, TGFB3, TRF, GDF1, INHBA, FOS, AFP, GDF6, INHBC, BMP6, BMP5, BMP4, BMP2, ATOH8, VIM	2104	77	18082	2.12062	1	0.0521094	0.0493863
GOTERM_BP_DIRECT	GO:0043032	positive regulation of macrophage activation	0.338696	0.00283098	IL33, IL1RL1, CD1D1, IFI204, WNT5A, LGALS9, ULBP1, THBS1	2104	18	18082	3.8196	1	0.0532907	0.0505058
GOTERM_BP_DIRECT	GO:0007413	axonal fasciculation	0.338696	0.00283098	SEMA5A, NRP1, CNR1, CRTAC1, SEMA3A, WNT5A, EPHB2, EPHB3	2104	18	18082	3.8196	1	0.0532907	0.0505058
GOTERM_BP_DIRECT	GO:0001709	cell fate determination	0.338696	0.00283098	CYP26B1, HAND1, PTCH2, HOXA2, EBF2, GATA3, GATA2, CHRDL1	2104	18	18082	3.8196	1	0.0532907	0.0505058
GOTERM_BP_DIRECT	GO:0043277	apoptotic cell clearance	0.338696	0.00283098	MARCO, LRP1, AXL, TYRO3, CD36, GAS6, MERTK, TGM2	2104	18	18082	3.8196	1	0.0532907	0.0505058
GOTERM_BP_DIRECT	GO:2000573	positive regulation of DNA biosynthetic process	0.338696	0.00283098	PDGFRB, RGCC, HGF, MYC, C3AR1, PDGFB, CYP1B1, NOX4	2104	18	18082	3.8196	1	0.0532907	0.0505058
GOTERM_BP_DIRECT	GO:0048546	digestive tract morphogenesis	0.338696	0.00283098	SFRP1, VANGL2, SFRP2, WNT5A, BCL2, SOX10, STRA6, EPHB3	2104	18	18082	3.8196	1	0.0532907	0.0505058
GOTERM_BP_DIRECT	GO:0008543	fibroblast growth factor receptor signaling pathway	0.550381	0.00287572	TRIM71, FGF1, SHCBP1, CTGF, FGF5, FGF7, FLRT2, FLRT3, FGF18, FAT4, FGFR2, FGFR1, FGF10	2104	43	18082	2.59822	1	0.0537825	0.0509719
GOTERM_BP_DIRECT	GO:0045740	positive regulation of DNA replication	0.550381	0.00287572	PDGFRA, JUN, TGFB3, PDGFB, IGF1, GLI1, GLI2, MAS1, IL6, KITL, CDK1, DNA2, FGF10	2104	43	18082	2.59822	1	0.0537825	0.0509719
GOTERM_BP_DIRECT	GO:0043524	negative regulation of neuron apoptotic process	1.35478	0.00289321	GABRB2, NRP1, DLX1, CCL12, LRP1, CITED1, SCT, C5AR1, KIF14, NDNF, CORO1A, MDK, NTF3, KDR, CCL2, NEFL, APOE, JUN, MEF2C, TGFB3, F2R, NGF, AGTR1A, EPOR, AGTR1B, NR4A3, AXL, BCL2, TYRO3, BIRC5, ADAM8, AGTR2	2104	160	18082	1.71882	1	0.0539351	0.0511166
GOTERM_BP_DIRECT	GO:0006468	protein phosphorylation	3.81033	0.00304336	ACVRL1, FLT1, FLT3, FLT4, NRK, LRRK1, BUB1B, HK1, MYLK, GSG2, KDR, PBK, PRKG2, NEK2, CTSG, EPHB2, MAP3K6, EPHB1, PRKG1, EPHB4, EPHB3, EPHA5, PDGFRB, MAP4K1, EPHA4, PDGFRA, PRKCH, KSR1, RIPK3, IGFBP3, WNT5A, HUNK, CIT, TGFBR2, CDC25B, D8ERTD82E, FGR, HCK, ZAP70, OBSCN, LATS2, MELK, PRKD3, KIT, TYRO3, BTK, BIRC5, PRKCQ, GAS6, TRIB2, EPHA3, EPHA2, DDR2, CSF1R, LAMA1, PKN3, PDGFB, TTK, MST1R, AURKC, …	2104	576	18082	1.34283	1	0.0565517	0.0535964
GOTERM_BP_DIRECT	GO:0070527	platelet aggregation	0.508044	0.0031094	FGB, FGA, PDGFRA, CSRP1, ITGB3, FGG, MPL, TYRO3, FLNA, MYL9, TSPAN32, FERMT3	2104	38	18082	2.71393	1	0.0575937	0.054584
GOTERM_BP_DIRECT	GO:0042472	inner ear morphogenesis	0.762066	0.00314509	PRRX1, COL11A1, PRRX2, WNT5A, MYO7A, GATA3, GATA2, NR4A3, MAFB, GBX2, ITGA8, CDH23, SPRY2, HOXA1, EPHB2, FGFR2, FGFR1, FGF10	2104	72	18082	2.14853	1	0.058027	0.0549946
GOTERM_BP_DIRECT	GO:0045060	negative thymic T cell selection	0.296359	0.00321836	ZAP70, PTPRC, CD28, CCR7, DOCK2, CD3E, GLI3	2104	14	18082	4.29705	1	0.058027	0.0549946
GOTERM_BP_DIRECT	GO:0001775	cell activation	0.296359	0.00321836	TGFB1, FN1, CCL3, IGF1, TIMP1, GATA3, TNF	2104	14	18082	4.29705	1	0.058027	0.0549946
GOTERM_BP_DIRECT	GO:0030949	positive regulation of vascular endothelial growth factor receptor signaling pathway	0.296359	0.00321836	BMP4, FLT1, FGF18, KDR, GRB10, TEK, FGF10	2104	14	18082	4.29705	1	0.058027	0.0549946
GOTERM_BP_DIRECT	GO:0007019	microtubule depolymerization	0.296359	0.00321836	KIF18A, KIF18B, NCKAP5L, STMN1, STMN2, KIF14, KIF2C	2104	14	18082	4.29705	1	0.058027	0.0549946
GOTERM_BP_DIRECT	GO:0043534	blood vessel endothelial cell migration	0.254022	0.00322174	SCARB1, SOX18, APOA1, EMP2, ADAM8, AMOT	2104	10	18082	5.15646	1	0.058027	0.0549946
GOTERM_BP_DIRECT	GO:0045446	endothelial cell differentiation	0.254022	0.00322174	BMPER, S1PR1, KDR, CXCR4, PTN, HOXB5	2104	10	18082	5.15646	1	0.058027	0.0549946
GOTERM_BP_DIRECT	GO:0010838	positive regulation of keratinocyte proliferation	0.254022	0.00322174	TGM1, FGF7, CDH3, TWIST2, HAS2, FGF10	2104	10	18082	5.15646	1	0.058027	0.0549946
GOTERM_BP_DIRECT	GO:0035050	embryonic heart tube development	0.381033	0.0032332	FOXC2, GJA1, FOXC1, SOX17, SOX18, GJA5, HAND1, TBX3, TBX2	2104	23	18082	3.36291	1	0.058027	0.0549946
GOTERM_BP_DIRECT	GO:0090103	cochlea morphogenesis	0.381033	0.0032332	VANGL2, FZD2, PTK7, WNT5A, HOXA1, TBX18, POU3F4, GLI2, CTHRC1	2104	23	18082	3.36291	1	0.058027	0.0549946
GOTERM_BP_DIRECT	GO:0051496	positive regulation of stress fiber assembly	0.550381	0.00354288	ARHGEF15, TGFB3, SERPINF2, TPM1, LPAR1, APOA1, SORBS3, CTGF, RGCC, WNT11, NOX4, PRKCQ, RAPGEF3	2104	44	18082	2.53917	1	0.0633879	0.0600753
GOTERM_BP_DIRECT	GO:0050727	regulation of inflammatory response	0.677392	0.00355785	LYN, ANXA1, PGLYRP2, AHSG, FANCA, NOD2, ADAMTS12, MAS1, IL1RL2, FABP4, NLRP6, ZYX, NLRP3, S100A9, MGLL, S100A8	2104	61	18082	2.25419	1	0.0634592	0.060143
GOTERM_BP_DIRECT	GO:0051259	protein oligomerization	0.719729	0.00363807	BLM, RRM2, AHNAK, CAV2, CAV1, QPRT, KCNA5, NOD2, MMP9, P2RX7, C1QTNF3, AR, GJA1, LIPC, C1QTNF6, GJA5, TEK	2104	67	18082	2.18059	1	0.0644921	0.0611219
GOTERM_BP_DIRECT	GO:0090263	positive regulation of canonical Wnt signaling pathway	0.719729	0.00363807	YAP1, WNT2B, CAV1, LRRK1, NRARP, DKK2, SULF2, COL1A1, SFRP4, ASPM, GPRC5B, SFRP1, SFRP2, RSPO1, WNT2, FGFR2, FGF10	2104	67	18082	2.18059	1	0.0644921	0.0611219
GOTERM_BP_DIRECT	GO:0043434	response to peptide hormone	0.762066	0.00366473	SPARC, ANXA1, LRP5, APOC3, SERPINA3M, CTGF, GIP, PLD2, COL1A1, SERPINA1A, GJA1, SERPINA1C, CXCL12, NEFL, TIMP1, NOS1, TEK, PLCD1	2104	73	18082	2.11909	1	0.0647659	0.0613814
GOTERM_BP_DIRECT	GO:0046777	protein autophosphorylation	1.4818	0.00379901	CSF1R, FLT1, FLT3, FLT4, TTK, THY1, AURKC, HK1, ERBB2, KDR, NEK2, EPHB1, EPHB4, EPHB3, LYN, PDGFRB, MAP4K1, EPHA4, PDGFRA, RIPK3, BMX, MAPK15, FGR, ZAP70, HCK, MELK, FES, STK17B, KIT, BTK, TYRO3, TEK, FGFR2, DDR2, FGFR1	2104	183	18082	1.64368	1	0.0669344	0.0634365
GOTERM_BP_DIRECT	GO:0001890	placenta development	0.592718	0.00385901	CDKN1C, CITED1, VWF, CCNF, SERPINE1, HTRA1, ASCL2, DCN, PEG10, PLAC1, PHLDA2, E2F7, IL11RA1, E2F8	2104	50	18082	2.40635	1	0.0677848	0.0642425
GOTERM_BP_DIRECT	GO:0007154	cell communication	0.508044	0.00388347	GJC1, GJA1, JAG1, GJD3, GJB4, GJA5, GJB6, GJA4, GJB5, FREM1, FREM2, GJE1	2104	39	18082	2.64434	1	0.0680078	0.0644538
GOTERM_BP_DIRECT	GO:0034113	heterotypic cell-cell adhesion	0.338696	0.00403722	CD2, PTPRC, ITGB3, ITGB2, ITGA7, MADCAM1, ITGB7, ITGA5	2104	19	18082	3.61857	1	0.0700633	0.0664019
GOTERM_BP_DIRECT	GO:0010951	negative regulation of endopeptidase activity	0.338696	0.00403722	CRB2, SERPINB6B, SERPINE1, TIMP2, TIMP1, SERPINB8, RENBP, STFA2	2104	19	18082	3.61857	1	0.0700633	0.0664019
GOTERM_BP_DIRECT	GO:0044849	estrous cycle	0.338696	0.00403722	EGR1, ANXA1, HAS1, ERBB2, OPRL1, HAS2, PTN, ETS1	2104	19	18082	3.61857	1	0.0700633	0.0664019
GOTERM_BP_DIRECT	GO:0051592	response to calcium ion	0.719729	0.00425454	FGB, FGA, RYR2, SPARC, TRPC3, DUSP1, CAV1, FGG, PLA2G4A, ITPR3, THBS1, P2RX7, IL6, S100A16, TNNT2, SDC1, PLCD1	2104	68	18082	2.14853	1	0.0736137	0.0697668
GOTERM_BP_DIRECT	GO:0050850	positive regulation of calcium-mediated signaling	0.381033	0.004362	ZAP70, CD4, CCL4, KDR, CCL3, CDH13, TREM2, CD3E, ITGAL	2104	24	18082	3.22279	1	0.0746269	0.070727
GOTERM_BP_DIRECT	GO:0010575	positive regulation of vascular endothelial growth factor production	0.381033	0.004362	IL1A, FLT4, C5AR1, C3AR1, CYP1B1, BRCA1, SULF1, PTGS2, SULF2	2104	24	18082	3.22279	1	0.0746269	0.070727
GOTERM_BP_DIRECT	GO:0002040	sprouting angiogenesis	0.42337	0.00436475	NRP1, FLT1, FLT4, CDH13, NRARP, TEK, THBS1, E2F7, E2F8, ENG	2104	29	18082	2.96348	1	0.0746269	0.070727
GOTERM_BP_DIRECT	GO:0030316	osteoclast differentiation	0.42337	0.00436475	CSF1R, EFNA2, GPR183, GPC3, TNFSF11, TRF, CD300LF, TNF, JUNB, EPHA2	2104	29	18082	2.96348	1	0.0746269	0.070727
GOTERM_BP_DIRECT	GO:0002544	chronic inflammatory response	0.211685	0.00477415	GJA1, CCL11, VCAM1, THBS1, S100A8	2104	7	18082	6.13865	1	0.0788042	0.074686
GOTERM_BP_DIRECT	GO:0045656	negative regulation of monocyte differentiation	0.211685	0.00477415	APCS, ZBTB46, INPP5D, MYC, HOXA7	2104	7	18082	6.13865	1	0.0788042	0.074686
GOTERM_BP_DIRECT	GO:0042448	progesterone metabolic process	0.211685	0.00477415	DHRS9, CYP21A1, AKR1C18, AFP, CYP17A1	2104	7	18082	6.13865	1	0.0788042	0.074686
GOTERM_BP_DIRECT	GO:0048251	elastic fiber assembly	0.211685	0.00477415	MFAP4, TNXB, LOX, MYH11, FBLN5	2104	7	18082	6.13865	1	0.0788042	0.074686
GOTERM_BP_DIRECT	GO:0032808	lacrimal gland development	0.211685	0.00477415	FOXC1, IGSF3, SOX10, FGFR2, FGF10	2104	7	18082	6.13865	1	0.0788042	0.074686
GOTERM_BP_DIRECT	GO:0048841	regulation of axon extension involved in axon guidance	0.211685	0.00477415	NRP1, PLXND1, SEMA3A, PLXNC1, PLXNA4	2104	7	18082	6.13865	1	0.0788042	0.074686
GOTERM_BP_DIRECT	GO:0002043	blood vessel endothelial cell proliferation involved in sprouting angiogenesis	0.211685	0.00477415	SEMA5A, BMP4, BMPER, NRARP, EPHA2	2104	7	18082	6.13865	1	0.0788042	0.074686
GOTERM_BP_DIRECT	GO:0022029	telencephalon cell migration	0.211685	0.00477415	CXCL12, SLIT1, TNR, CXCR4, SLIT2	2104	7	18082	6.13865	1	0.0788042	0.074686
GOTERM_BP_DIRECT	GO:0085029	extracellular matrix assembly	0.211685	0.00477415	TGFB1, HAS1, HAS2, GAS6, GPM6B	2104	7	18082	6.13865	1	0.0788042	0.074686
GOTERM_BP_DIRECT	GO:0060664	epithelial cell proliferation involved in salivary gland morphogenesis	0.211685	0.00477415	IL6, PDGFB, TNF, FGFR2, FGF10	2104	7	18082	6.13865	1	0.0788042	0.074686
GOTERM_BP_DIRECT	GO:0051918	negative regulation of fibrinolysis	0.211685	0.00477415	APOH, SERPINF2, SERPINE1, PLG, THBS1	2104	7	18082	6.13865	1	0.0788042	0.074686
GOTERM_BP_DIRECT	GO:0060325	face morphogenesis	0.508044	0.00480376	COL1A1, PDGFRA, TGFB2, TGFB1, CRISPLD1, TGFB3, MMP2, NOG, TWIST2, ARID5B, MSX1, STRA6	2104	40	18082	2.57823	1	0.0788042	0.074686
GOTERM_BP_DIRECT	GO:0001541	ovarian follicle development	0.635055	0.00483215	FOXC1, MMP2, INHBA, ICAM1, LFNG, BMP4, FGF7, MMP14, KITL, MYC, KIT, DMC1, BCL2, KDR, MMP19	2104	57	18082	2.26161	1	0.0788042	0.074686
GOTERM_BP_DIRECT	GO:0070301	cellular response to hydrogen peroxide	0.635055	0.00483215	TRPC6, ANXA1, KLF4, ETS1, KLF2, AQP1, FABP1, IL6, IL18RAP, AXL, LCN2, CDK1, CYP1B1, ECT2, EZH2	2104	57	18082	2.26161	1	0.0788042	0.074686
GOTERM_BP_DIRECT	GO:0000902	cell morphogenesis	0.804403	0.00483377	YAP1, TGFB2, HGF, LST1, GATA3, GJE1, KLF2, P2RX7, GREM1, PDPN, BCL2, NOX4, ADAM8, MSX1, ECT2, IL7R, SOX6, EPHB2, CAP2	2104	81	18082	2.0159	1	0.0788042	0.074686
GOTERM_BP_DIRECT	GO:0033627	cell adhesion mediated by integrin	0.296359	0.00484089	COL16A1, NOV, ITGB3, ITGA11, ITGA5, FBN1, ICAM1	2104	15	18082	4.01058	1	0.0788042	0.074686
GOTERM_BP_DIRECT	GO:0007263	nitric oxide mediated signal transduction	0.296359	0.00484089	GUCY1A3, GUCY1B3, RASD1, NDNF, APOE, CD36, NOS1	2104	15	18082	4.01058	1	0.0788042	0.074686
GOTERM_BP_DIRECT	GO:0030326	embryonic limb morphogenesis	0.677392	0.00493099	FBN2, TGFB2, PRRX1, PRRX2, WNT5A, TWIST1, GLI3, GREM1, BMP4, CYP26B1, MUSTN1, ALDH1A2, GJA5, MSX1, LMX1B, FGFR1	2104	63	18082	2.18263	1	0.0800454	0.0758624
GOTERM_BP_DIRECT	GO:0030282	bone mineralization	0.465707	0.00524782	CLEC3B, BMP2, WNT11, GPC3, PTN, PTH1R, PTGS2, ASPN, FGFR2, IFITM5, CER1	2104	35	18082	2.701	1	0.0845037	0.0800877
GOTERM_BP_DIRECT	GO:0019722	calcium-mediated signaling	0.550381	0.00524949	RYR2, EDN1, SPHK1, HPCA, HTR2B, CXCR4, AVPR1A, TNF, AGTR1A, CXCR3, CCL3, TNFSF11, NMUR1	2104	46	18082	2.42877	1	0.0845037	0.0800877
GOTERM_BP_DIRECT	GO:0048536	spleen development	0.550381	0.00524949	RIPK3, FLT3, TCF21, BARX1, TLX1, MYB, BCL2, HOXB4, PITX2, CDH17, NKX2-3, NKX3-2, FGF10	2104	46	18082	2.42877	1	0.0845037	0.0800877
GOTERM_BP_DIRECT	GO:0060484	lung-associated mesenchyme development	0.254022	0.00534425	WNT11, PTK7, WNT7B, FGFR2, HOXA5, FGFR1	2104	11	18082	4.68769	1	0.085316	0.0808576
GOTERM_BP_DIRECT	GO:0050777	negative regulation of immune response	0.254022	0.00534425	TGFB2, COL3A1, TGFB1, NLRP6, INPP5D, FCGR2B	2104	11	18082	4.68769	1	0.085316	0.0808576
GOTERM_BP_DIRECT	GO:0043206	extracellular fibril organization	0.254022	0.00534425	MFAP5, MFAP4, COL3A1, TNXB, COL5A1, LTBP2	2104	11	18082	4.68769	1	0.085316	0.0808576
GOTERM_BP_DIRECT	GO:0007422	peripheral nervous system development	0.338696	0.0055956	HEYL, EDNRB, ERBB2, NTF3, OSM, SOX8, NGF, SOX10	2104	20	18082	3.43764	1	0.0865684	0.0820445
GOTERM_BP_DIRECT	GO:0019229	regulation of vasoconstriction	0.338696	0.0055956	EDN1, TBXA2R, KCNA5, ADRA1B, ADRA2B, ADRA1A, AGTR1A, AGTR1B	2104	20	18082	3.43764	1	0.0865684	0.0820445
GOTERM_BP_DIRECT	GO:0010596	negative regulation of endothelial cell migration	0.338696	0.0055956	ACVRL1, SP100, APOH, SERPINF1, SLIT2, NR2F2, THBS1, DCN	2104	20	18082	3.43764	1	0.0865684	0.0820445
GOTERM_BP_DIRECT	GO:0045880	positive regulation of smoothened signaling pathway	0.42337	0.00560262	SFRP1, EVC, CHSY1, PRRX1, SMO, PRRX2, GPC3, GAS1, KIF7, GLI1	2104	30	18082	2.8647	1	0.0865684	0.0820445
GOTERM_BP_DIRECT	GO:0001958	endochondral ossification	0.42337	0.00560262	COL1A1, BMP4, MMP14, MEF2C, COL13A1, MMP16, FGF18, TEK, HSPG2, BMP6	2104	30	18082	2.8647	1	0.0865684	0.0820445
GOTERM_BP_DIRECT	GO:0021983	pituitary gland development	0.42337	0.00560262	BMP4, ALDH1A2, NOG, MSX1, PITX2, GLI1, GATA2, ETS1, FGF10, GLI2	2104	30	18082	2.8647	1	0.0865684	0.0820445
GOTERM_BP_DIRECT	GO:0000281	mitotic cytokinesis	0.42337	0.00560262	ANLN, PLK1, STMN1, NUSAP1, CKAP2, KIF23, KIF20A, CENPA, CEP55, KIF4	2104	30	18082	2.8647	1	0.0865684	0.0820445
GOTERM_BP_DIRECT	GO:0044344	cellular response to fibroblast growth factor stimulus	0.42337	0.00560262	COL1A1, NR4A1, POSTN, ZFP36, SFRP1, CPS1, MYC, SNAI2, CCL2, ZFP36L1	2104	30	18082	2.8647	1	0.0865684	0.0820445
GOTERM_BP_DIRECT	GO:0030182	neuron differentiation	1.10076	0.00566241	WNT2B, BHLHE22, GATA3, GATA2, CHRDL1, WNT6, WNT11, CASP3, S1PR1, GPC2, PITX2, WNT2, IER2, MEF2C, TRPC6, DNMT3A, SMARCA1, PHOX2B, TAL1, TLX1, ALDH1A2, ID1, ID3, LMX1B, EPHA2, GAS7	2104	127	18082	1.75942	1	0.0865684	0.0820445
GOTERM_BP_DIRECT	GO:0045123	cellular extravasation	0.169348	0.00573727	ITGAM, ITGA1, ITGB2, TNF	2104	4	18082	8.59411	1	0.0865684	0.0820445
GOTERM_BP_DIRECT	GO:0021569	rhombomere 3 development	0.169348	0.00573727	EGR2, HOXA2, HOXB2, HOXA1	2104	4	18082	8.59411	1	0.0865684	0.0820445
GOTERM_BP_DIRECT	GO:0001845	phagolysosome assembly	0.169348	0.00573727	P2RX7, SRPX, MYO7A, CORO1A	2104	4	18082	8.59411	1	0.0865684	0.0820445
GOTERM_BP_DIRECT	GO:0097490	sympathetic neuron projection extension	0.169348	0.00573727	NRP1, NRP2, SEMA3A, SEMA3F	2104	4	18082	8.59411	1	0.0865684	0.0820445
GOTERM_BP_DIRECT	GO:0032348	negative regulation of aldosterone biosynthetic process	0.169348	0.00573727	REST, BMP2, BMP5, DKK3	2104	4	18082	8.59411	1	0.0865684	0.0820445
GOTERM_BP_DIRECT	GO:0010644	cell communication by electrical coupling	0.169348	0.00573727	GJA1, KCNA1, GJA5, DBN1	2104	4	18082	8.59411	1	0.0865684	0.0820445
GOTERM_BP_DIRECT	GO:1902285	semaphorin-plexin signaling pathway involved in neuron projection guidance	0.169348	0.00573727	NRP1, NRP2, SEMA3A, SEMA3F	2104	4	18082	8.59411	1	0.0865684	0.0820445
GOTERM_BP_DIRECT	GO:0033687	osteoblast proliferation	0.169348	0.00573727	OSR2, FIGNL1, LRRC17, JUNB	2104	4	18082	8.59411	1	0.0865684	0.0820445
GOTERM_BP_DIRECT	GO:0036486	ventral trunk neural crest cell migration	0.169348	0.00573727	NRP1, NRP2, SEMA3A, SEMA3F	2104	4	18082	8.59411	1	0.0865684	0.0820445
GOTERM_BP_DIRECT	GO:0097491	sympathetic neuron projection guidance	0.169348	0.00573727	NRP1, NRP2, SEMA3A, SEMA3F	2104	4	18082	8.59411	1	0.0865684	0.0820445
GOTERM_BP_DIRECT	GO:1903142	positive regulation of establishment of endothelial barrier	0.169348	0.00573727	CDH5, CLDN5, PROC, S1PR2	2104	4	18082	8.59411	1	0.0865684	0.0820445
GOTERM_BP_DIRECT	GO:2000065	negative regulation of cortisol biosynthetic process	0.169348	0.00573727	REST, BMP2, BMP5, DKK3	2104	4	18082	8.59411	1	0.0865684	0.0820445
GOTERM_BP_DIRECT	GO:0045672	positive regulation of osteoclast differentiation	0.381033	0.00577072	CCR1, CSF1R, CAR2, ITGB3, CCL3, TNFSF11, FOS, TNF, ITGA9	2104	25	18082	3.09388	1	0.0866208	0.0820941
GOTERM_BP_DIRECT	GO:1902042	negative regulation of extrinsic apoptotic signaling pathway via death domain receptors	0.381033	0.00577072	FGB, FGA, SFRP2, HGF, FGG, SERPINE1, HMGB2, BRCA1, ICAM1	2104	25	18082	3.09388	1	0.0866208	0.0820941
GOTERM_BP_DIRECT	GO:0019233	sensory perception of pain	0.762066	0.00649845	EDN1, ACE, CHRNA4, OPRL1, NGF, PTGS2, CACNA1H, GIP, AQP1, PTGS1, CRHR2, P2RX7, EDNRA, EDNRB, CNR1, ALOX5, P2RY2, PRX	2104	77	18082	2.00901	1	0.0972915	0.0922073
GOTERM_BP_DIRECT	GO:2000353	positive regulation of endothelial cell apoptotic process	0.296359	0.0069922	BMP4, COL18A1, RGCC, ECSCR, AKR1C18, CD248, THBS1	2104	16	18082	3.75992	1	0.103876	0.098448
GOTERM_BP_DIRECT	GO:0006171	cAMP biosynthetic process	0.296359	0.0069922	CALCRL, ADCY4, ADCY2, ADM, ADCY1, ADCY7, ADCY5	2104	16	18082	3.75992	1	0.103876	0.098448
GOTERM_BP_DIRECT	GO:0035265	organ growth	0.296359	0.0069922	BCL2, LMX1B, ADRA1B, ADRA1A, GJE1, FGFR2, FGF10	2104	16	18082	3.75992	1	0.103876	0.098448
GOTERM_BP_DIRECT	GO:0045777	positive regulation of blood pressure	0.42337	0.00709482	OLFR78, CNR1, NCF2, TBXA2R, AVPR2, AVPR1A, ADRA2B, AGTR1A, AGTR1B, CRHR2	2104	31	18082	2.77229	1	0.105131	0.0996367
GOTERM_BP_DIRECT	GO:0007162	negative regulation of cell adhesion	0.508044	0.00715687	SEMA5A, ACVRL1, EPHA5, PODXL, MMP2, TNC, PLXNB3, TNR, CDH13, FBLN1, LAMB1, MYO1F	2104	42	18082	2.45546	1	0.105779	0.100251
GOTERM_BP_DIRECT	GO:0009615	response to virus	0.804403	0.00718831	CHRM2, IFITM3, BATF3, IFITM1, MEF2C, IFITM2, MST1R, GATA3, TNF, IFIT2, IFIH1, BST2, ACTA2, TBX21, STMN1, LCN2, TLR8, IFI27L2A, TLR13	2104	84	18082	1.94391	1	0.105973	0.100435
GOTERM_BP_DIRECT	GO:0043010	camera-type eye development	0.762066	0.00743091	CDKN1C, FBN2, FOXC2, FOXC1, JAG1, GLI3, BMP4, RCN1, EFEMP1, WT1, ALDH1A2, MAB21L1, MAB21L2, GAS1, LMX1B, PITX2, CRYAA, CRYAB	2104	78	18082	1.98326	1	0.109179	0.103474
GOTERM_BP_DIRECT	GO:0001843	neural tube closure	0.889077	0.00745367	TRIM71, TGIF1, STIL, TGFB2, TGFB1, LMO4, SEMA4C, NOG, WNT5A, TWIST1, ADM, RGMA, BMP4, CECR2, ZEB2, SFRP1, VANGL2, SFRP2, PTK7, DLC1, KIF20B	2104	97	18082	1.86058	1	0.109179	0.103474
GOTERM_BP_DIRECT	GO:0048545	response to steroid hormone	0.381033	0.00750027	PAQR9, CAR2, DAB2, PAQR7, LOX, BCL2, HMGB2, ADRA1B, TGFBR2	2104	26	18082	2.97488	1	0.109179	0.103474
GOTERM_BP_DIRECT	GO:0045662	negative regulation of myoblast differentiation	0.381033	0.00750027	BMP4, CCL9, TGFB1, CMTM5, ID3, SOX8, MBNL3, TNF, TBX3	2104	26	18082	2.97488	1	0.109179	0.103474
GOTERM_BP_DIRECT	GO:0035904	aorta development	0.381033	0.00750027	LOX, PLXND1, PDE2A, CXCR4, LRP2, KIF7, SMAD6, LTBP1, LOXL1	2104	26	18082	2.97488	1	0.109179	0.103474
GOTERM_BP_DIRECT	GO:0045879	negative regulation of smoothened signaling pathway	0.338696	0.00756353	SERPINE2, WNT7B, HHIP, GPC3, GAS1, KIF7, CD3E, GLI3	2104	21	18082	3.27395	1	0.109274	0.103564
GOTERM_BP_DIRECT	GO:0030279	negative regulation of ossification	0.338696	0.00756353	SFRP1, MEF2C, TGFB1, CHSY1, P2RY2, BCL2, SMAD6, GFRA4	2104	21	18082	3.27395	1	0.109274	0.103564
GOTERM_BP_DIRECT	GO:0030500	regulation of bone mineralization	0.338696	0.00756353	ECM1, GJA1, MGP, OMD, S1PR1, TWIST1, IFITM5, DDR2	2104	21	18082	3.27395	1	0.109274	0.103564
GOTERM_BP_DIRECT	GO:0050680	negative regulation of epithelial cell proliferation	0.719729	0.00762936	CDKN1C, MEF2C, TGFB2, TGFB1, WNT5A, WFDC1, PTN, BMP4, AR, DAB2, SFRP1, SFRP2, GPC3, RGN, GAS1, FGFR2, LIMS2	2104	72	18082	2.02916	1	0.10995	0.104205
GOTERM_BP_DIRECT	GO:0048705	skeletal system morphogenesis	0.592718	0.00775928	PDGFRB, PDGFRA, TCF15, HHIP, COL11A1, MMP2, ARID5B, P2RX7, COL1A1, MYC, HOXB4, HOXB2, HOXD8, NKX3-2	2104	54	18082	2.2281	1	0.111365	0.105546
GOTERM_BP_DIRECT	GO:0042733	embryonic digit morphogenesis	0.677392	0.00776609	OSR2, OSR1, NOG, WNT5A, LRP5, TWIST1, TBX3, GLI3, TBX2, GLI2, BMP4, GJA1, SFRP2, HAND2, GAS1, MSX1	2104	66	18082	2.08342	1	0.111365	0.105546
GOTERM_BP_DIRECT	GO:0016055	Wnt signaling pathway	1.60881	0.00812012	WNT2B, TGFB1I1, TCF7, LRP5, APCDD1, NDRG2, CPZ, WISP1, NKD1, NKD2, WNT6, WNT11, FRAT2, PEG12, SOX17, TMEM88, WIF1, MYC, RSPO1, PITX2, WNT2, FZD1, TCF7L1, FZD2, FZD4, WNT7B, WNT5A, HIC1, DKK2, DKK3, SFRP4, DAB2, SFRP1, SFRP2, PTK7, CCDC88C, TAX1BP3, TRABD2B	2104	213	18082	1.53322	1	0.116154	0.110084
GOTERM_BP_DIRECT	GO:0045086	positive regulation of interleukin-2 biosynthetic process	0.254022	0.00829239	CD1D2, IL1A, CD1D1, CD28, PRKCQ, CD3E	2104	12	18082	4.29705	1	0.116598	0.110505
GOTERM_BP_DIRECT	GO:0046785	microtubule polymerization	0.254022	0.00829239	MTAP7D3, TPPP3, TRPV4, CAV1, FBXO5, TPPP	2104	12	18082	4.29705	1	0.116598	0.110505
GOTERM_BP_DIRECT	GO:0035457	cellular response to interferon-alpha	0.254022	0.00829239	IFI204, AXL, MYC, GATA3, GAS6, IFIT2	2104	12	18082	4.29705	1	0.116598	0.110505
GOTERM_BP_DIRECT	GO:0097028	dendritic cell differentiation	0.254022	0.00829239	LYN, BATF3, AXL, FLT3, TREM2, GAS6	2104	12	18082	4.29705	1	0.116598	0.110505
GOTERM_BP_DIRECT	GO:0001818	negative regulation of cytokine production	0.254022	0.00829239	AXL, SLC11A1, BTK, NDRG2, MERTK, EPHA2	2104	12	18082	4.29705	1	0.116598	0.110505
GOTERM_BP_DIRECT	GO:0045995	regulation of embryonic development	0.254022	0.00829239	LAMA5, LAMA2, SOX17, LAMA1, LAMA4, PHLDA2	2104	12	18082	4.29705	1	0.116598	0.110505
GOTERM_BP_DIRECT	GO:0021952	central nervous system projection neuron axonogenesis	0.254022	0.00829239	PRDM8, BHLHE22, SLIT2, EPHB2, EPHB1, EPHB3	2104	12	18082	4.29705	1	0.116598	0.110505
GOTERM_BP_DIRECT	GO:0046426	negative regulation of JAK-STAT cascade	0.508044	0.00862851	LRRC15, SOCS3, FLRT2, LRRTM3, FLRT3, CAV1, BGN, RTN4RL2, PODN, LRRC4C, ASPN, DCN	2104	43	18082	2.39836	1	0.119051	0.11283
GOTERM_BP_DIRECT	GO:0045986	negative regulation of smooth muscle contraction	0.211685	0.00867286	CALCRL, NCF1, MRVI1, PTGS2, PRKG1	2104	8	18082	5.37132	1	0.119051	0.11283
GOTERM_BP_DIRECT	GO:0034380	high-density lipoprotein particle assembly	0.211685	0.00867286	APOM, APOA2, APOA1, APOA4, APOE	2104	8	18082	5.37132	1	0.119051	0.11283
GOTERM_BP_DIRECT	GO:0055009	atrial cardiac muscle tissue morphogenesis	0.211685	0.00867286	TNNT2, NOG, PITX2, WNT2, ENG	2104	8	18082	5.37132	1	0.119051	0.11283
GOTERM_BP_DIRECT	GO:2000107	negative regulation of leukocyte apoptotic process	0.211685	0.00867286	CXCL12, HCLS1, CCR7, MERTK, CCL21A	2104	8	18082	5.37132	1	0.119051	0.11283
GOTERM_BP_DIRECT	GO:0043615	astrocyte cell migration	0.211685	0.00867286	CCL12, MMP14, CCL3, CCL2, APCDD1	2104	8	18082	5.37132	1	0.119051	0.11283
GOTERM_BP_DIRECT	GO:0045416	positive regulation of interleukin-8 biosynthetic process	0.211685	0.00867286	APOA2, TLR8, TLR7, TNF, ELANE	2104	8	18082	5.37132	1	0.119051	0.11283
GOTERM_BP_DIRECT	GO:0051549	positive regulation of keratinocyte migration	0.211685	0.00867286	FGF7, SERPINE1, HAS2, MMP9, FGF10	2104	8	18082	5.37132	1	0.119051	0.11283
GOTERM_BP_DIRECT	GO:0060463	lung lobe morphogenesis	0.211685	0.00867286	FOXF1, LIF, IGF1, FGFR2, TGFBR2	2104	8	18082	5.37132	1	0.119051	0.11283
GOTERM_BP_DIRECT	GO:0061299	retina vasculature morphogenesis in camera-type eye	0.211685	0.00867286	NRP1, ARHGEF15, FZD4, RHOJ, LRP5	2104	8	18082	5.37132	1	0.119051	0.11283
GOTERM_BP_DIRECT	GO:0043154	negative regulation of cysteine-type endopeptidase activity involved in apoptotic process	0.677392	0.00895687	HGF, IGF1, IFI202B, KLF4, THBS1, AQP1, FABP1, NR4A1, IL6, SFRP2, MICAL1, DPEP1, BIRC5, GAS6, CRYAA, CRYAB	2104	67	18082	2.05232	1	0.121944	0.115571
GOTERM_BP_DIRECT	GO:0048468	cell development	0.550381	0.00896801	GDF10, GATA6, GATA5, ARID5B, GDF1, IGF1, INHBA, INHBC, PHOX2B, BMP5, GJC1, MAF, SMO	2104	49	18082	2.28007	1	0.121944	0.115571
GOTERM_BP_DIRECT	GO:0009953	dorsal/ventral pattern formation	0.550381	0.00896801	TGIF1, EDN1, HHIP, NOG, GLI1, GLI3, DUSP6, GLI2, SMO, HOXA2, GAS1, HOXB2, LMX1B	2104	49	18082	2.28007	1	0.121944	0.115571
GOTERM_BP_DIRECT	GO:0016049	cell growth	0.550381	0.00896801	EDN1, TGFB2, TGFB1, TGFB3, ITGB3, EMP1, NDNF, EMP3, ADRA1B, ADRA1A, IL6, BCL2, IL7R	2104	49	18082	2.28007	1	0.121944	0.115571
GOTERM_BP_DIRECT	GO:0006885	regulation of pH	0.381033	0.00959242	CAR2, EDN1, EDNRB, CAR14, ATP6V0A4, SLC26A9, CAR12, ATP12A, AGTR1A	2104	27	18082	2.8647	1	0.129218	0.122465
GOTERM_BP_DIRECT	GO:0032689	negative regulation of interferon-gamma production	0.381033	0.00959242	IL33, IL1RL1, PGLYRP2, AXL, NOD2, LGALS9, GATA3, GAS6, PGLYRP1	2104	27	18082	2.8647	1	0.129218	0.122465
GOTERM_BP_DIRECT	GO:0035025	positive regulation of Rho protein signal transduction	0.381033	0.00959242	PDGFRB, GPR17, COL3A1, F2R, LPAR1, GPR20, A630033H20RIK, APOA1, LPAR4	2104	27	18082	2.8647	1	0.129218	0.122465
GOTERM_BP_DIRECT	GO:0008585	female gonad development	0.381033	0.00959242	PDGFRA, SFRP1, FST, SERPINE1, FANCA, ARID5B, COL9A3, PITX2, BRCA2	2104	27	18082	2.8647	1	0.129218	0.122465
GOTERM_BP_DIRECT	GO:0050870	positive regulation of T cell activation	0.296359	0.00975816	CD4, TNFSF11, CCL2, PRKCQ, THY1, CD3E, CORO1A	2104	17	18082	3.53875	1	0.130867	0.124028
GOTERM_BP_DIRECT	GO:0003281	ventricular septum development	0.465707	0.00978273	PTK7, LMO4, GJA5, PDE2A, CXCR4, LRP2, GATA3, SMAD6, LTBP1, CYR61, STRA6	2104	38	18082	2.48777	1	0.130867	0.124028
GOTERM_BP_DIRECT	GO:0048873	homeostasis of number of cells within a tissue	0.465707	0.00978273	SASH3, P2RX7, SMO, COL14A1, FLT3, CD7, F2R, BCL2, ILDR2, GATA2, CORO1A	2104	38	18082	2.48777	1	0.130867	0.124028
GOTERM_BP_DIRECT	GO:0033138	positive regulation of peptidyl-serine phosphorylation	0.719729	0.00998062	BCAR3, TGFB1, CAV1, WNT5A, OSM, LIF, TNF, IL6, TRIM6, SFRP2, NTF3, BCL2, SPRY2, HCLS1, TEK, GAS6, RAPGEF3	2104	74	18082	1.97432	1	0.132531	0.125605
GOTERM_BP_DIRECT	GO:0051497	negative regulation of stress fiber assembly	0.338696	0.00999888	KANK2, TMSB15B2, TMEFF2, DLC1, S1PR1, ARHGAP28, KANK4, KANK3	2104	22	18082	3.12513	1	0.132531	0.125605
GOTERM_BP_DIRECT	GO:1902895	positive regulation of pri-miRNA transcription from RNA polymerase II promoter	0.338696	0.00999888	BMP4, JUN, BMP2, SPI1, TGFB1, PDGFB, FOS, SMAD6	2104	22	18082	3.12513	1	0.132531	0.125605
GOTERM_BP_DIRECT	GO:0045671	negative regulation of osteoclast differentiation	0.338696	0.00999888	PILRB1, SFRP1, MAFB, UBASH3B, INPP5D, LRRC17, CCL3, FBN1	2104	22	18082	3.12513	1	0.132531	0.125605
GOTERM_BP_DIRECT	GO:0071346	cellular response to interferon-gamma	0.677392	0.0102877	CCL24, CCL12, EDN1, CCL11, GM13304, WNT5A, AIF1, CCL9, CCL7, CCL6, MYC, CCL4, MRC1, CCL3, CCL2, CCL21A	2104	68	18082	2.02214	1	0.136047	0.128938
GOTERM_BP_DIRECT	GO:0045785	positive regulation of cell adhesion	0.592718	0.0106262	TNXB, TPM1, TNF, RHOD, VAV1, PLD2, APBB1IP, DAB2, CXCL12, ERBB2, CCL2, ADAM8, TEK, TGM2	2104	56	18082	2.14853	1	0.140203	0.132876
GOTERM_BP_DIRECT	GO:0007565	female pregnancy	0.762066	0.0108888	SLC38A1, TGFB1, HPGD, TGFB3, IGFBP2, AKR1C18, ADM, FOS, ADRA2B, PCSK5, ETS1, GIP, HSD11B2, CLDN4, PAPPA, PNOC, FOSB, LGALS9	2104	81	18082	1.9098	1	0.14334	0.135849
GOTERM_BP_DIRECT	GO:0035116	embryonic hindlimb morphogenesis	0.42337	0.0109683	BMP4, OSR2, OSR1, GPC3, TWIST1, RARB, MSX1, PITX2, AFF3, TBX3	2104	33	18082	2.60427	1	0.144058	0.13653
GOTERM_BP_DIRECT	GO:0006641	triglyceride metabolic process	0.465707	0.011817	TNXB, G6PC, LIPC, CAV1, APOH, ANGPTL3, APOC3, CYP2E1, APOE, CD36, NKX2-3	2104	39	18082	2.42398	1	0.154503	0.146429
GOTERM_BP_DIRECT	GO:0045595	regulation of cell differentiation	0.465707	0.011817	BMP4, SOCS3, SOX17, FES, PAX4, HMGB2, LIF, SPRY2, KLF4, GLI3, TCFL5	2104	39	18082	2.42398	1	0.154503	0.146429
GOTERM_BP_DIRECT	GO:0055010	ventricular cardiac muscle tissue morphogenesis	0.381033	0.0120891	FOXC2, FOXC1, TGFB1, TNNT2, COL11A1, TPM1, HAND1, EPOR, FGFR2	2104	28	18082	2.76239	1	0.155309	0.147193
GOTERM_BP_DIRECT	GO:0007052	mitotic spindle organization	0.381033	0.0120891	GPSM2, STIL, CCNB1, STMN1, POC1A, AURKC, AURKB, NDC80, AURKA	2104	28	18082	2.76239	1	0.155309	0.147193
GOTERM_BP_DIRECT	GO:0033344	cholesterol efflux	0.381033	0.0120891	SCARB1, APOM, CAV1, APOC2, APOA2, APOC3, APOA1, APOA4, APOE	2104	28	18082	2.76239	1	0.155309	0.147193
GOTERM_BP_DIRECT	GO:0048812	neuron projection morphogenesis	0.635055	0.0121091	WNT7B, ITGA1, WNT5A, NGF, KLK8, THBS4, GJA1, SLIT1, KDR, NEFL, DMD, SLIT2, KIF20B, PLXNA4, GAS7	2104	63	18082	2.04622	1	0.155309	0.147193
GOTERM_BP_DIRECT	GO:0001946	lymphangiogenesis	0.254022	0.0122012	ACVRL1, FOXC2, SOX18, FLT4, PDPN, PTPN14	2104	13	18082	3.96651	1	0.155309	0.147193
GOTERM_BP_DIRECT	GO:0043537	negative regulation of blood vessel endothelial cell migration	0.254022	0.0122012	ACVRL1, ANGPT2, RGCC, TGFB1, APOE, THBS1	2104	13	18082	3.96651	1	0.155309	0.147193
GOTERM_BP_DIRECT	GO:0048699	generation of neurons	0.254022	0.0122012	TAL1, NTF3, CXCR4, DBN1, CIT, FGFR1	2104	13	18082	3.96651	1	0.155309	0.147193
GOTERM_BP_DIRECT	GO:0010524	positive regulation of calcium ion transport into cytosol	0.254022	0.0122012	P2RX7, BMP4, CD4, ADCYAP1R1, TRPC3, CAV1	2104	13	18082	3.96651	1	0.155309	0.147193
GOTERM_BP_DIRECT	GO:0003197	endocardial cushion development	0.254022	0.0122012	TMEM100, BMP4, FOXF1, ERG, THBS1, EPHA3	2104	13	18082	3.96651	1	0.155309	0.147193
GOTERM_BP_DIRECT	GO:0045576	mast cell activation	0.254022	0.0122012	FCGR3, RHOH, LCP2, CD48, FCGR2B, FYB	2104	13	18082	3.96651	1	0.155309	0.147193
GOTERM_BP_DIRECT	GO:0001913	T cell mediated cytotoxicity	0.254022	0.0122012	RAET1D, GZMB, CTSH, EMP2, CTSC, STX11	2104	13	18082	3.96651	1	0.155309	0.147193
GOTERM_BP_DIRECT	GO:0043129	surfactant homeostasis	0.254022	0.0122012	FGF7, NAPSA, EPAS1, KDR, CTSH, PLA2G4A	2104	13	18082	3.96651	1	0.155309	0.147193
GOTERM_BP_DIRECT	GO:0007193	adenylate cyclase-inhibiting G-protein coupled receptor signaling pathway	0.508044	0.0122631	NPB, NPR3, OPRL1, HTR2B, S1PR1, LPAR1, ADCY4, S1PR3, ADCY2, ADCY1, ADCY7, SSTR5	2104	45	18082	2.29176	1	0.155413	0.147292
GOTERM_BP_DIRECT	GO:0045429	positive regulation of nitric oxide biosynthetic process	0.508044	0.0122631	IL6, DDAH1, DDAH2, ITGB2, PTX3, KLF4, PTGS2, ULBP1, TNF, AIF1, KLF2, ICAM1	2104	45	18082	2.29176	1	0.155413	0.147292
GOTERM_BP_DIRECT	GO:0036120	cellular response to platelet-derived growth factor stimulus	0.338696	0.0129589	CCNA2, ITGB3, HAS1, MYC, SNAI2, CCL2, HAS2, PTN	2104	23	18082	2.98925	1	0.163176	0.154649
GOTERM_BP_DIRECT	GO:0007044	cell-substrate junction assembly	0.169348	0.0131015	ITGB3, FN1, ITGA5, TNS1	2104	5	18082	6.87529	1	0.163176	0.154649
GOTERM_BP_DIRECT	GO:0060033	anatomical structure regression	0.169348	0.0131015	SPI1, WNT7B, LRP5, CD248	2104	5	18082	6.87529	1	0.163176	0.154649
GOTERM_BP_DIRECT	GO:0051150	regulation of smooth muscle cell differentiation	0.169348	0.0131015	BMP4, MYOCD, FOXF1, FGFR2	2104	5	18082	6.87529	1	0.163176	0.154649
GOTERM_BP_DIRECT	GO:0003158	endothelium development	0.169348	0.0131015	GJA1, GJA5, GJA4, KDR	2104	5	18082	6.87529	1	0.163176	0.154649
GOTERM_BP_DIRECT	GO:0010757	negative regulation of plasminogen activation	0.169348	0.0131015	SERPINE2, SERPINF2, SERPINE1, THBS1	2104	5	18082	6.87529	1	0.163176	0.154649
GOTERM_BP_DIRECT	GO:0098869	cellular oxidant detoxification	0.169348	0.0131015	HBA-A2, HBB-BT, HBA-A1, HBB-BS	2104	5	18082	6.87529	1	0.163176	0.154649
GOTERM_BP_DIRECT	GO:0060665	regulation of branching involved in salivary gland morphogenesis by mesenchymal-epithelial signaling	0.169348	0.0131015	FGF7, HGF, FGF10, FGFR1	2104	5	18082	6.87529	1	0.163176	0.154649
GOTERM_BP_DIRECT	GO:0030889	negative regulation of B cell proliferation	0.296359	0.0132217	LYN, TNFRSF13B, INPP5D, CASP3, BTK, BTLA, FCGR2B	2104	18	18082	3.34215	1	0.164319	0.155732
GOTERM_BP_DIRECT	GO:0042110	T cell activation	0.42337	0.0134135	CD2, IL6, HSH2D, CD4, TGFB1, CD28, ICOSL, CD48, DOCK2, VAV1	2104	34	18082	2.52768	1	0.166344	0.157651
GOTERM_BP_DIRECT	GO:0007613	memory	0.762066	0.0138268	CX3CR1, NOG, IGF2, ITPR3, IGF1, NGF, S100B, PTGS2, KLK8, GIP, PTGS1, HTR7, CNR1, HRH2, ITGA8, ITGA5, LMX1B, KCNK2	2104	83	18082	1.86378	1	0.170089	0.161201
GOTERM_BP_DIRECT	GO:0007015	actin filament organization	0.762066	0.0138268	TMSB15B2, CCL11, AVIL, LMOD1, TRF, EMP2, CORO1A, SORBS3, AKAP2, CRHR2, PDLIM3, TRPV4, FSCN1, BCL2, RAC2, CRYAA, TMSB10, DBN1	2104	83	18082	1.86378	1	0.170089	0.161201
GOTERM_BP_DIRECT	GO:0045860	positive regulation of protein kinase activity	0.635055	0.013886	WNT5A, MMD2, TNF, CYR61, CDC25B, CENPE, GPRC5B, CD4, RELN, TRAF4, LCP2, ZP3, GAS6, CCL21A, DDR2	2104	64	18082	2.01424	1	0.170089	0.161201
GOTERM_BP_DIRECT	GO:0050714	positive regulation of protein secretion	0.465707	0.0141547	FGB, P2RX7, FGA, IL1A, TGFB2, TGFB1, TGFB3, FGG, VEGFC, PRKCQ, IGF1	2104	40	18082	2.36338	1	0.170089	0.161201
GOTERM_BP_DIRECT	GO:0060346	bone trabecula formation	0.211685	0.0141864	FBN2, COL1A1, SFRP1, MMP2, THBS3	2104	9	18082	4.7745	1	0.170089	0.161201
GOTERM_BP_DIRECT	GO:0035988	chondrocyte proliferation	0.211685	0.0141864	MMP14, MMP16, MUSTN1, DDR2, CTGF	2104	9	18082	4.7745	1	0.170089	0.161201
GOTERM_BP_DIRECT	GO:0002862	negative regulation of inflammatory response to antigenic stimulus	0.211685	0.0141864	GPR17, GPX2, NLRP6, NOD2, FCGR2B	2104	9	18082	4.7745	1	0.170089	0.161201
GOTERM_BP_DIRECT	GO:0003084	positive regulation of systemic arterial blood pressure	0.211685	0.0141864	ACE, AVPR2, NR2F2, AVPR1A, ADRA1A	2104	9	18082	4.7745	1	0.170089	0.161201
GOTERM_BP_DIRECT	GO:0032836	glomerular basement membrane development	0.211685	0.0141864	WT1, COL4A4, SULF1, NID1, SULF2	2104	9	18082	4.7745	1	0.170089	0.161201
GOTERM_BP_DIRECT	GO:0061549	sympathetic ganglion development	0.211685	0.0141864	NRP1, NRP2, SEMA3A, SEMA3F, PHOX2B	2104	9	18082	4.7745	1	0.170089	0.161201
GOTERM_BP_DIRECT	GO:0061032	visceral serous pericardium development	0.211685	0.0141864	VCAM1, WT1, HAND2, PDPN, EPOR	2104	9	18082	4.7745	1	0.170089	0.161201
GOTERM_BP_DIRECT	GO:0007494	midgut development	0.211685	0.0141864	SMO, CPS1, FOXF1, ALDH1A2, WNT5A	2104	9	18082	4.7745	1	0.170089	0.161201
GOTERM_BP_DIRECT	GO:2001214	positive regulation of vasculogenesis	0.211685	0.0141864	TMEM100, KDR, ASB4, ADM, CD34	2104	9	18082	4.7745	1	0.170089	0.161201
GOTERM_BP_DIRECT	GO:0010873	positive regulation of cholesterol esterification	0.211685	0.0141864	APOA2, APOA1, APOA4, APOE, AGTR1A	2104	9	18082	4.7745	1	0.170089	0.161201
GOTERM_BP_DIRECT	GO:0003417	growth plate cartilage development	0.211685	0.0141864	COL9A1, RARB, THBS1, THBS3, TGFBR2	2104	9	18082	4.7745	1	0.170089	0.161201
GOTERM_BP_DIRECT	GO:0008354	germ cell migration	0.211685	0.0141864	FOXC1, TGFB1, CXCL12, KIT, CXCR4	2104	9	18082	4.7745	1	0.170089	0.161201
GOTERM_BP_DIRECT	GO:0007519	skeletal muscle tissue development	0.592718	0.0142551	MEF2C, TGFB1, CAV1, ELN, KCNAB1, NR2F2, MEOX2, COL19A1, DCN, PDLIM3, HLX, DMD, PITX2, HOXD9	2104	58	18082	2.07444	1	0.170559	0.161646
GOTERM_BP_DIRECT	GO:0045597	positive regulation of cell differentiation	0.508044	0.0144674	BMP4, AR, SOCS3, JUN, BMP2, SOX17, SERPINF2, PAX4, GATA3, JUNB, CYR61, CTGF	2104	46	18082	2.24194	1	0.172742	0.163714
GOTERM_BP_DIRECT	GO:0048738	cardiac muscle tissue development	0.381033	0.0150317	GJC1, ALDH1A2, GATA6, PITX2, ZFPM2, HSPG2, SGCG, BMP5, TBX2	2104	29	18082	2.66714	1	0.178374	0.169052
GOTERM_BP_DIRECT	GO:0045930	negative regulation of mitotic cell cycle	0.381033	0.0150317	FOXC1, BRINP1, TGFB1, TIMP2, BCL2, GAS1, BRINP3, TNF, MAD2L1	2104	29	18082	2.66714	1	0.178374	0.169052
GOTERM_BP_DIRECT	GO:0043392	negative regulation of DNA binding	0.381033	0.0150317	JUN, SMO, HAND2, ID1, WFIKKN2, TWIST2, NEK2, MSX1, MDFI	2104	29	18082	2.66714	1	0.178374	0.169052
GOTERM_BP_DIRECT	GO:0042391	regulation of membrane potential	0.84674	0.0153387	POPDC2, CHRNB4, CHRNA3, CHRNA4, KCNA1, KCNH8, ATP1A4, GRIK3, KCNA5, GRIN2C, CACNA1H, CACNA1G, PIEZO2, PIEZO1, SLC26A7, DMD, SLC26A9, SLC26A10, CNIH2, KCNK2	2104	97	18082	1.77198	1	0.181644	0.172152
GOTERM_BP_DIRECT	GO:0010033	response to organic substance	0.635055	0.0158572	TGFB1, UGT1A1, SERPINF2, PLA2G4A, KCNA5, PYGM, AVPR1A, KLF4, TNF, P2RX7, REN1, P2RX2, CASP3, BTK, CTSC	2104	65	18082	1.98326	1	0.187401	0.177607
GOTERM_BP_DIRECT	GO:0048589	developmental growth	0.42337	0.01624	ASPM, SMO, BCL2, GAS1, ADM, GATA3, SOX10, GLI3, STRA6, GLI2	2104	35	18082	2.45546	1	0.191143	0.181154
GOTERM_BP_DIRECT	GO:0006953	acute-phase response	0.42337	0.01624	SERPINA1A, IL6, CD163, UGT1A1, AHSG, SAA3, SERPINF2, FN1, HP, F2	2104	35	18082	2.45546	1	0.191143	0.181154
GOTERM_BP_DIRECT	GO:0009749	response to glucose	0.719729	0.0163784	EGR1, TGFB1, ANGPT2, NCF2, APOA2, ILDR2, TRH, THBS1, CTGF, GIP, TGFBR2, GJA1, APOM, GJD3, COL6A2, CASP3, NNAT	2104	78	18082	1.87307	1	0.191758	0.181737
GOTERM_BP_DIRECT	GO:0032760	positive regulation of tumor necrosis factor production	0.592718	0.0163918	SASH3, TWIST1, CYBA, NOD2, NFATC4, CD2, CCL4, CCL3, CCL2, CCR7, CD36, CD14, LGALS9, PF4	2104	59	18082	2.03928	1	0.191758	0.181737
GOTERM_BP_DIRECT	GO:0043408	regulation of MAPK cascade	0.592718	0.0163918	GDF10, TGFB2, TGFB1, TGFB3, GDF1, INHBA, INHBC, BMP6, BMP5, REN1, BMP2, ID1, TIMP2, TLR13	2104	59	18082	2.03928	1	0.191758	0.181737
GOTERM_BP_DIRECT	GO:0046697	decidualization	0.338696	0.0164988	PTGIS, LIF, PLA2G4A, GHRL, PTGS2, JUNB, EPOR, IL11RA1	2104	24	18082	2.8647	1	0.19223	0.182185
GOTERM_BP_DIRECT	GO:0048646	anatomical structure formation involved in morphogenesis	0.338696	0.0164988	BMP4, NOG, GATA5, HOXA1, GATA3, GLI3, TBX18, GLI2	2104	24	18082	2.8647	1	0.19223	0.182185
GOTERM_BP_DIRECT	GO:0007420	brain development	1.56647	0.0166224	FOXC1, PFKFB3, CITED1, SCT, KCNA1, HPCA, CXCR4, BRCA2, PCDH19, PCDH18, GLI3, PTPRG, RELN, NTF3, STMN1, NNAT, S1PR1, PITX2, SPHK1, NOG, UNC5C, KCNAB1, SMARCA1, HSPG2, EPOR, POU3F4, TGFBR2, ASPM, CXCL12, COL4A1, B3GNT5, ID1, ITGA8, ID4, CD9, KCNK3, FGFR1	2104	216	18082	1.47214	1	0.193281	0.183181
GOTERM_BP_DIRECT	GO:0051930	regulation of sensory perception of pain	0.465707	0.0168212	TMEM100, IL1A, EDN1, EDNRB, F2R, OPRL1, CCL3, NOS1, ACPP, MGLL, FGFR1	2104	41	18082	2.30574	1	0.1952	0.184999
GOTERM_BP_DIRECT	GO:0030308	negative regulation of cell growth	1.01609	0.0170809	ACVRL1, TGFB2, TGFB1, SERPINE2, AHSG, RRAD, INHBA, MNDAL, BST2, GREM1, DAB2, GJA1, SFRP1, WNT11, SFRP2, NOV, SOX17, WT1, BCL2, GAS1, SLIT3, MSX1, SLIT2, CRYAB	2104	125	18082	1.65007	1	0.197124	0.186822
GOTERM_BP_DIRECT	GO:0051279	regulation of release of sequestered calcium ion into cytosol	0.254022	0.0171916	LYN, UBASH3B, ITGB3, CYBA, NGF, CORO1A	2104	14	18082	3.68319	1	0.197124	0.186822
GOTERM_BP_DIRECT	GO:0061053	somite development	0.254022	0.0171916	RAD51B, WNT11, SMO, WNT5A, NOG, SOX11	2104	14	18082	3.68319	1	0.197124	0.186822
GOTERM_BP_DIRECT	GO:0048246	macrophage chemotaxis	0.254022	0.0171916	CX3CR1, LGALS3, CCL12, EDNRB, CCL3, CCL2	2104	14	18082	3.68319	1	0.197124	0.186822
GOTERM_BP_DIRECT	GO:0048771	tissue remodeling	0.254022	0.0171916	MMP14, MMP2, CSPG4, PLG, MMP9, THBS4	2104	14	18082	3.68319	1	0.197124	0.186822
GOTERM_BP_DIRECT	GO:0007187	G-protein coupled receptor signaling pathway, coupled to cyclic nucleotide second messenger	0.254022	0.0171916	ANXA1, OPRL1, GPR1, PTH1R, SSTR4, SSTR5	2104	14	18082	3.68319	1	0.197124	0.186822
GOTERM_BP_DIRECT	GO:0048598	embryonic morphogenesis	0.296359	0.0174608	BMP4, ZEB2, FLT1, FLRT3, HTR2B, GAS1, GLI3	2104	19	18082	3.16625	1	0.198633	0.188253
GOTERM_BP_DIRECT	GO:0009888	tissue development	0.296359	0.0174608	BMP4, POSTN, LAMA1, WT1, GATA5, BARX1, GATA2	2104	19	18082	3.16625	1	0.198633	0.188253
GOTERM_BP_DIRECT	GO:0001556	oocyte maturation	0.296359	0.0174608	CCNB1, DMC1, PDE3A, FBXO5, TRIP13, BRCA2, CDC25B	2104	19	18082	3.16625	1	0.198633	0.188253
GOTERM_BP_DIRECT	GO:0009190	cyclic nucleotide biosynthetic process	0.296359	0.0174608	GUCY1A3, GUCY1B3, ADCY4, ADCY2, ADCY1, ADCY7, ADCY5	2104	19	18082	3.16625	1	0.198633	0.188253
GOTERM_BP_DIRECT	GO:0019221	cytokine-mediated signaling pathway	1.1431	0.0175789	CX3CR1, CSF1R, LRRC15, CCL12, NUMBL, FLT3, PIRB, SOCS3, FLRT2, LRRTM3, FLRT3, CCL2, TNFSF11, LRRC4C, IL11RA1, BGN, RTN4RL2, PODN, ASPN, DCN, IL1A, IL6, KLF6, KIT, IL2RB, IRF5, PF4	2104	146	18082	1.58932	1	0.199585	0.189155
GOTERM_BP_DIRECT	GO:0010975	regulation of neuron projection development	0.381033	0.0184604	CHODL, GRID2, SFRP1, SFRP2, AVIL, DPYSL3, NCS1, GATA3, RGMA	2104	30	18082	2.57823	1	0.209182	0.198251
GOTERM_BP_DIRECT	GO:0016485	protein processing	0.762066	0.0193542	SRGN, MCPT8, CMA1, MCPT4, F12, GZMB, AEBP1, CPZ, PCSK5, GLI3, P2RX7, CASP7, ADAMTS2, ADAMTS3, MMP16, MYC, CASP3, CTSG	2104	86	18082	1.79877	1	0.218881	0.207443
GOTERM_BP_DIRECT	GO:0021766	hippocampus development	0.677392	0.0194232	EPHA5, DLX1, DLX2, ANXA3, KCNA1, KIF14, GLI3, MAS1, ZEB2, NR4A3, RELN, MDK, ID4, NEFL, EZH2, MFSD2A	2104	73	18082	1.88364	1	0.219232	0.207775
GOTERM_BP_DIRECT	GO:0016358	dendrite development	0.42337	0.0194789	NRP1, RELN, GRIN3A, LST1, GHRL, TULP1, SCARF1, PRKG1, IGSF9, CIT	2104	36	18082	2.38725	1	0.219432	0.207965
GOTERM_BP_DIRECT	GO:0010942	positive regulation of cell death	0.508044	0.0197532	ACER2, BMP4, EGR1, DNMT3A, LPAR1, HP, CIDEB, AKR1C18, PTGS2, KCNK2, DUSP6, CTGF	2104	48	18082	2.14853	1	0.222089	0.210483
GOTERM_BP_DIRECT	GO:0014070	response to organic cyclic compound	0.719729	0.0205796	LYN, ANGPT2, NCF2, LUM, IGF2, MKI67, ATP12A, DUSP6, GIP, PLD2, ICAM1, P2RX7, MMP14, SFRP1, EDNRB, CDK1, SCN5A	2104	80	18082	1.82625	1	0.230166	0.218138
GOTERM_BP_DIRECT	GO:0021772	olfactory bulb development	0.338696	0.0206708	CSF1R, DLX2, EFNA2, CRTAC1, SEMA3A, SLIT1, KIF14, SLIT2	2104	25	18082	2.75011	1	0.230166	0.218138
GOTERM_BP_DIRECT	GO:0002009	morphogenesis of an epithelium	0.338696	0.0206708	CAR2, CITED1, WNT5A, TIMELESS, CAR9, FREM2, HOXA5, GLI2	2104	25	18082	2.75011	1	0.230166	0.218138
GOTERM_BP_DIRECT	GO:0014065	phosphatidylinositol 3-kinase signaling	0.338696	0.0206708	PREX2, EDN1, ERBB2, HTR2B, IGF1, GATA3, PIK3R6, ZFP36L1	2104	25	18082	2.75011	1	0.230166	0.218138
GOTERM_BP_DIRECT	GO:0031295	T cell costimulation	0.338696	0.0206708	EFNB2, LGALS1, CAV1, CD28, BTLA, CD3E, ICOS, CCL21A	2104	25	18082	2.75011	1	0.230166	0.218138
GOTERM_BP_DIRECT	GO:0005980	glycogen catabolic process	0.211685	0.0214961	G6PC, CPS1, STBD1, PYGM, PYGL	2104	10	18082	4.29705	1	0.236171	0.223829
GOTERM_BP_DIRECT	GO:0060710	chorio-allantoic fusion	0.211685	0.0214961	VCAM1, WNT7B, CYR61, BMP5, ZFP36L1	2104	10	18082	4.29705	1	0.236171	0.223829
GOTERM_BP_DIRECT	GO:0015909	long-chain fatty acid transport	0.211685	0.0214961	FABP1, FABP2, APOE, CD36, CPT1B	2104	10	18082	4.29705	1	0.236171	0.223829
GOTERM_BP_DIRECT	GO:0055123	digestive system development	0.211685	0.0214961	CDKN1C, PITX2, BARX1, NKX3-2, GIP	2104	10	18082	4.29705	1	0.236171	0.223829
GOTERM_BP_DIRECT	GO:2000727	positive regulation of cardiac muscle cell differentiation	0.211685	0.0214961	GREM1, EFNB2, MYOCD, MEF2C, TGFB1	2104	10	18082	4.29705	1	0.236171	0.223829
GOTERM_BP_DIRECT	GO:0034501	protein localization to kinetochore	0.211685	0.0214961	CDK1, BUB1B, TTK, SPDL1, AURKB	2104	10	18082	4.29705	1	0.236171	0.223829
GOTERM_BP_DIRECT	GO:0031639	plasminogen activation	0.211685	0.0214961	FGB, FGA, APOH, FGG, PLAT	2104	10	18082	4.29705	1	0.236171	0.223829
GOTERM_BP_DIRECT	GO:0048538	thymus development	0.550381	0.0222216	BCL11B, RIPK3, LMO4, IKZF1, GATA3, CCNB2, MAFB, HAND2, MYB, HOXA3, BCL2, EPHB3, FGF10	2104	55	18082	2.03133	1	0.243083	0.23038
GOTERM_BP_DIRECT	GO:0045746	negative regulation of Notch signaling pathway	0.381033	0.0224137	DLX1, DLX2, EGFL7, MMP14, HEY2, NRARP, GATA2, PEAR1, DLK1	2104	31	18082	2.49506	1	0.243083	0.23038
GOTERM_BP_DIRECT	GO:0019433	triglyceride catabolic process	0.296359	0.0225458	LIPC, CPS1, APOC3, APOA1, APOA4, APOE, MGLL	2104	20	18082	3.00794	1	0.243083	0.23038
GOTERM_BP_DIRECT	GO:0045780	positive regulation of bone resorption	0.296359	0.0225458	CAR2, AHSG, ITGB3, TNFSF11, TRF, ADAM8, ITGA9	2104	20	18082	3.00794	1	0.243083	0.23038
GOTERM_BP_DIRECT	GO:0030301	cholesterol transport	0.296359	0.0225458	MSR1, SCARB1, LIPC, APOA2, APOA1, CD36, GPIHBP1	2104	20	18082	3.00794	1	0.243083	0.23038
GOTERM_BP_DIRECT	GO:0046597	negative regulation of viral entry into host cell	0.296359	0.0225458	IFITM3, APCS, IFITM1, IFITM2, TRIM59, PTX3, TRIM10	2104	20	18082	3.00794	1	0.243083	0.23038
GOTERM_BP_DIRECT	GO:0030318	melanocyte differentiation	0.296359	0.0225458	MEF2C, EDNRB, CITED1, KIT, BCL2, SOX10, GLI3	2104	20	18082	3.00794	1	0.243083	0.23038
GOTERM_BP_DIRECT	GO:0031290	retinal ganglion cell axon guidance	0.296359	0.0225458	NRP1, ISL2, SLIT1, SLIT2, EPHB2, EPHB1, EPHB3	2104	20	18082	3.00794	1	0.243083	0.23038
GOTERM_BP_DIRECT	GO:0033198	response to ATP	0.296359	0.0225458	P2RX7, PANX1, P2RX6, P2RX5, TRPC3, SELL, P2RX2	2104	20	18082	3.00794	1	0.243083	0.23038
GOTERM_BP_DIRECT	GO:0007088	regulation of mitotic nuclear division	0.296359	0.0225458	CENPE, BORA, CAV2, CCDC8, FBXO5, MKI67, KIF20B	2104	20	18082	3.00794	1	0.243083	0.23038
GOTERM_BP_DIRECT	GO:0034097	response to cytokine	0.719729	0.0229651	JUN, SPARC, CITED1, AVPR2, SERPINA3M, FOS, OSMR, PTGS2, CORO1A, SERPINA1A, COL3A1, SERPINA1C, ALDH1A2, TIMP2, BCL2, TIMP1, JUNB	2104	81	18082	1.8037	1	0.24597	0.233116
GOTERM_BP_DIRECT	GO:0008219	cell death	0.42337	0.0231601	TGFB2, RGS19, BRINP1, PMP22, EMP1, OLR1, EMP2, EMP3, SNCAIP, KLK8	2104	37	18082	2.32273	1	0.24597	0.233116
GOTERM_BP_DIRECT	GO:0071549	cellular response to dexamethasone stimulus	0.42337	0.0231601	BMP4, IL6, TGFB1, SERPINF1, CCL2, AGTR2, AGTR1A, AQP1, ABCG2, AGTR1B	2104	37	18082	2.32273	1	0.24597	0.233116
GOTERM_BP_DIRECT	GO:0048013	ephrin receptor signaling pathway	0.465707	0.0232391	EFNB2, EPHA5, EPHA4, EFNA2, EPHB2, EFNA4, EPHB1, EPHB4, EPHA3, EPHB3, EPHA2	2104	43	18082	2.19849	1	0.24597	0.233116
GOTERM_BP_DIRECT	GO:0006693	prostaglandin metabolic process	0.254022	0.023367	PTGIS, HPGD, PDPN, TBXAS1, PTGS2, PTGS1	2104	15	18082	3.43764	1	0.24597	0.233116
GOTERM_BP_DIRECT	GO:0050673	epithelial cell proliferation	0.254022	0.023367	FABP7, KIT, COL8A2, COL8A1, FGFR2, FGF10	2104	15	18082	3.43764	1	0.24597	0.233116
GOTERM_BP_DIRECT	GO:0030502	negative regulation of bone mineralization	0.254022	0.023367	CCR1, SRGN, GREM1, NFE2, ECM1, AHSG	2104	15	18082	3.43764	1	0.24597	0.233116
GOTERM_BP_DIRECT	GO:0007202	activation of phospholipase C activity	0.254022	0.023367	ADCYAP1R1, DLC1, HTR2B, LPAR1, NMUR1, ADRA1A	2104	15	18082	3.43764	1	0.24597	0.233116
GOTERM_BP_DIRECT	GO:0061029	eyelid development in camera-type eye	0.254022	0.023367	OSR2, JUN, TWIST1, SOX11, INHBA, STRA6	2104	15	18082	3.43764	1	0.24597	0.233116
GOTERM_BP_DIRECT	GO:2000249	regulation of actin cytoskeleton reorganization	0.254022	0.023367	CSF1R, TGFB1, GMFG, ARHGDIB, RHOD, RAPGEF3	2104	15	18082	3.43764	1	0.24597	0.233116
GOTERM_BP_DIRECT	GO:0050901	leukocyte tethering or rolling	0.254022	0.023367	VCAM1, SELPLG, MADCAM1, ITGB7, CHST4, TNF	2104	15	18082	3.43764	1	0.24597	0.233116
GOTERM_BP_DIRECT	GO:0042573	retinoic acid metabolic process	0.254022	0.023367	CYP26B1, CRABP2, ALDH1A2, RBP1, LRAT, ALDH8A1	2104	15	18082	3.43764	1	0.24597	0.233116
GOTERM_BP_DIRECT	GO:0003181	atrioventricular valve morphogenesis	0.254022	0.023367	HEYL, TGFB2, BMP2, ZFPM2, CYR61, TGFBR2	2104	15	18082	3.43764	1	0.24597	0.233116
GOTERM_BP_DIRECT	GO:0001936	regulation of endothelial cell proliferation	0.169348	0.0239495	BMP4, ALDH1A2, KDR, TEK	2104	6	18082	5.7294	1	0.247592	0.234653
GOTERM_BP_DIRECT	GO:0072307	regulation of metanephric nephron tubule epithelial cell differentiation	0.169348	0.0239495	YAP1, WWTR1, LIF, FAT4	2104	6	18082	5.7294	1	0.247592	0.234653
GOTERM_BP_DIRECT	GO:0048570	notochord morphogenesis	0.169348	0.0239495	WNT11, WNT5A, NOG, EPHA2	2104	6	18082	5.7294	1	0.247592	0.234653
GOTERM_BP_DIRECT	GO:0060708	spongiotrophoblast differentiation	0.169348	0.0239495	SOCS3, GJB5, LIF, ASCL2	2104	6	18082	5.7294	1	0.247592	0.234653
GOTERM_BP_DIRECT	GO:0071636	positive regulation of transforming growth factor beta production	0.169348	0.0239495	SERPINF2, PTGS2, THBS1, CD34	2104	6	18082	5.7294	1	0.247592	0.234653
GOTERM_BP_DIRECT	GO:0032964	collagen biosynthetic process	0.169348	0.0239495	COL1A1, ADAMTS3, COL5A1, SERPINH1	2104	6	18082	5.7294	1	0.247592	0.234653
GOTERM_BP_DIRECT	GO:0097070	ductus arteriosus closure	0.169348	0.0239495	MYOCD, HPGD, FOXF1, STRA6	2104	6	18082	5.7294	1	0.247592	0.234653
GOTERM_BP_DIRECT	GO:0070206	protein trimerization	0.169348	0.0239495	C1QTNF3, TRIM6, C1QTNF2, C1QTNF5	2104	6	18082	5.7294	1	0.247592	0.234653
GOTERM_BP_DIRECT	GO:0003416	endochondral bone growth	0.169348	0.0239495	EVC, BNC2, KDR, DDR2	2104	6	18082	5.7294	1	0.247592	0.234653
GOTERM_BP_DIRECT	GO:0046879	hormone secretion	0.169348	0.0239495	FFAR4, LTBP4, ADM, LRP2	2104	6	18082	5.7294	1	0.247592	0.234653
GOTERM_BP_DIRECT	GO:0000082	G1/S transition of mitotic cell cycle	0.592718	0.0242672	TCF19, TRIM71, CDCA5, INHBA, IQGAP3, GPR132, RGCC, LATS2, MYB, CDK2, ID4, SKP2, POLE, CDKN3	2104	62	18082	1.9406	1	0.249983	0.236919
GOTERM_BP_DIRECT	GO:0001947	heart looping	0.592718	0.0242672	MEF2C, STIL, WNT5A, TBX3, TBX2, TGFBR2, GJA1, VANGL2, SMO, SOX17, HAND2, ALDH1A2, HAND1, ENG	2104	62	18082	1.9406	1	0.249983	0.236919
GOTERM_BP_DIRECT	GO:0035690	cellular response to drug	0.677392	0.0244414	PPP1R14A, MEF2C, EDN1, BLM, SERPINE1, PDE2A, MYLK, ACER2, REN1, REST, MYC, CCL4, DPEP1, CCL2, CD69, GAS6	2104	75	18082	1.83341	1	0.251329	0.238195
GOTERM_BP_DIRECT	GO:0006469	negative regulation of protein kinase activity	0.804403	0.0246195	WWTR1, LRRC15, BGN, RTN4RL2, THY1, PODN, ASPN, DCN, SOCS3, IL6, PTPRC, FABP4, FLRT2, UBASH3B, LRRTM3, FLRT3, RGN, SH3BP5, LRRC4C	2104	95	18082	1.71882	1	0.25271	0.239504
GOTERM_BP_DIRECT	GO:0045668	negative regulation of osteoblast differentiation	0.550381	0.025384	GDF10, CITED1, NOG, TWIST2, LRP5, TWIST1, TNF, SFRP1, HAND2, ID1, HOXA2, ID3, FGFR1	2104	56	18082	1.99506	1	0.259635	0.246067
GOTERM_BP_DIRECT	GO:0001756	somitogenesis	0.550381	0.025384	CRB2, FOXC2, IFITM1, FOXC1, TCF15, FOXF1, PCDH8, WNT5A, TBX18, LFNG, ZEB2, SFRP1, SFRP2	2104	56	18082	1.99506	1	0.259635	0.246067
GOTERM_BP_DIRECT	GO:0060716	labyrinthine layer blood vessel development	0.338696	0.0255231	NFE2, HEY2, VASH2, PLG, JUNB, WNT2, CYR61, PLCD1	2104	26	18082	2.64434	1	0.260597	0.246978
GOTERM_BP_DIRECT	GO:0000165	MAPK cascade	0.635055	0.0259393	CCL12, MEF2C, PLVAP, TGFB1, CAV1, SLC11A1, ADRA2B, TNF, ZFP36L1, ZFP36, DOK2, DOK4, MYC, CCL3, CCL2	2104	69	18082	1.86828	1	0.264379	0.250563
GOTERM_BP_DIRECT	GO:0042157	lipoprotein metabolic process	0.381033	0.0269274	APOM, APOL11B, LRP1, APOA2, APOC3, APOA1, OLR1, APOA4, APOE	2104	32	18082	2.41709	1	0.273485	0.259194
GOTERM_BP_DIRECT	GO:0048678	response to axon injury	0.381033	0.0269274	LYN, LGALS1, FLRT3, DPYSL3, ERBB2, CDK1, AIF1, KCNK2, GIP	2104	32	18082	2.41709	1	0.273485	0.259194
GOTERM_BP_DIRECT	GO:0051276	chromosome organization	0.42337	0.0273117	BLM, CENPW, PTTG1, BNC1, MYC, CDCA8, RAD54L, BRCA2, GEM, SMC2	2104	38	18082	2.26161	1	0.275452	0.261057
GOTERM_BP_DIRECT	GO:0030879	mammary gland development	0.42337	0.0273117	HOXB9, TGFB1, TGFB3, CAV1, IGF1, BRCA2, HOXD9, TBX3, GLI3, GLI2	2104	38	18082	2.26161	1	0.275452	0.261057
GOTERM_BP_DIRECT	GO:0072593	reactive oxygen species metabolic process	0.42337	0.0273117	P2RX7, BCL2, PDGFB, PMAIP1, NOX4, CYBA, PLA2R1, VAV1, CYR61, CTGF	2104	38	18082	2.26161	1	0.275452	0.261057
GOTERM_BP_DIRECT	GO:0045909	positive regulation of vasodilation	0.42337	0.0273117	NPPC, GJA1, CPS1, GJA5, KDR, ADM, AGTR2, NOS1, PRKG1, APLN	2104	38	18082	2.26161	1	0.275452	0.261057
GOTERM_BP_DIRECT	GO:0007517	muscle organ development	0.592718	0.0274283	LAMA5, UNC45B, TCF15, TWIST1, JPH1, COL19A1, DES, TMEM8C, ID3, DMD, MSX1, CRYAB, SGCG, HIST1H1B	2104	63	18082	1.9098	1	0.276147	0.261716
GOTERM_BP_DIRECT	GO:0045471	response to ethanol	0.931414	0.0282279	CAR3, ADCYAP1R1, SPARC, VCAM1, TNC, HTR3A, SLC2A4, TRH, GATA3, ICAM1, NPPC, GRIN3A, CNR1, TBXA2R, MYC, TBXAS1, BCL2, CDK1, CCL2, CYP2E1, CD14, S100A8	2104	117	18082	1.61599	1	0.283702	0.268877
GOTERM_BP_DIRECT	GO:0001764	neuron migration	0.973751	0.0283545	NRP1, NRP2, MEF2C, SEMA6A, SEMA3A, NR2F1, TWIST1, CXCR4, NDNF, NR2F2, GATA3, GATA2, PHOX2B, ASPM, GJA1, RELN, CXCL12, AXL, LMX1B, PITX2, GAS6, MDGA1, PRKG1	2104	124	18082	1.59407	1	0.284354	0.269494
GOTERM_BP_DIRECT	GO:0048266	behavioral response to pain	0.296359	0.0285387	HTR7, P2RX2, OSM, VWA1, THBS1, THBS4, PIRT	2104	21	18082	2.8647	1	0.284354	0.269494
GOTERM_BP_DIRECT	GO:0010001	glial cell differentiation	0.296359	0.0285387	FGF5, GAP43, RELN, NFIB, ERBB2, IGF1, PHOX2B	2104	21	18082	2.8647	1	0.284354	0.269494
GOTERM_BP_DIRECT	GO:0051412	response to corticosterone	0.296359	0.0285387	HTR7, NEFL, FOSB, FOS, AVPR1A, TRH, AGTR1A	2104	21	18082	2.8647	1	0.284354	0.269494
GOTERM_BP_DIRECT	GO:0035162	embryonic hemopoiesis	0.296359	0.0285387	TAL1, KITL, LMO2, KIT, KDR, GATA3, TGFBR2	2104	21	18082	2.8647	1	0.284354	0.269494
GOTERM_BP_DIRECT	GO:0009408	response to heat	0.550381	0.0288629	TGFB1I1, HSPB7, HSPB2, OSM, IGF1, CXCL2, IL6, CXCL12, CCL2, IGFBP7, NOS1, CD14, PIRT	2104	57	18082	1.96006	1	0.287089	0.272086
GOTERM_BP_DIRECT	GO:0046330	positive regulation of JNK cascade	0.635055	0.0290709	FLT4, WNT7B, SERPINF2, WNT5A, TNFRSF19, NOD2, TNF, LMNB1, CTGF, IL1A, TRAF4, TRPV4, TNFSF11, CCL21A, ANKRD6	2104	70	18082	1.84159	1	0.288661	0.273576
GOTERM_BP_DIRECT	GO:0055015	ventricular cardiac muscle cell development	0.211685	0.0307258	CCNB1, HEY2, CDK1, FHL2, PITX2	2104	11	18082	3.90641	1	0.295766	0.28031
GOTERM_BP_DIRECT	GO:0051006	positive regulation of lipoprotein lipase activity	0.211685	0.0307258	APOC2, APOH, APOA1, APOA4, GPIHBP1	2104	11	18082	3.90641	1	0.295766	0.28031
GOTERM_BP_DIRECT	GO:0046641	positive regulation of alpha-beta T cell proliferation	0.211685	0.0307258	ZAP70, BLM, PTPRC, CD28, CD3E	2104	11	18082	3.90641	1	0.295766	0.28031
GOTERM_BP_DIRECT	GO:0008347	glial cell migration	0.211685	0.0307258	EPHA4, TGFB2, FN1, CCL2, CSPG4	2104	11	18082	3.90641	1	0.295766	0.28031
GOTERM_BP_DIRECT	GO:0042554	superoxide anion generation	0.211685	0.0307258	EDN1, NCF1, NCF2, NOX4, CYBA	2104	11	18082	3.90641	1	0.295766	0.28031
GOTERM_BP_DIRECT	GO:0045603	positive regulation of endothelial cell differentiation	0.211685	0.0307258	TMEM100, ACVRL1, BMP4, ATOH8, BMP6	2104	11	18082	3.90641	1	0.295766	0.28031
GOTERM_BP_DIRECT	GO:0032940	secretion by cell	0.211685	0.0307258	SERPINE2, AXL, TYRO3, MERTK, AQP1	2104	11	18082	3.90641	1	0.295766	0.28031
GOTERM_BP_DIRECT	GO:0043568	positive regulation of insulin-like growth factor receptor signaling pathway	0.211685	0.0307258	AR, CDH3, IGFBP4, IGFBP3, IGF1	2104	11	18082	3.90641	1	0.295766	0.28031
GOTERM_BP_DIRECT	GO:0007435	salivary gland morphogenesis	0.211685	0.0307258	TGFB2, TGFB1, TGFB3, FGF10, FGFR1	2104	11	18082	3.90641	1	0.295766	0.28031
GOTERM_BP_DIRECT	GO:0045647	negative regulation of erythrocyte differentiation	0.211685	0.0307258	ZFP36, MAFB, LMO2, HOXA5, ZFP36L1	2104	11	18082	3.90641	1	0.295766	0.28031
GOTERM_BP_DIRECT	GO:0050774	negative regulation of dendrite morphogenesis	0.211685	0.0307258	TRPC6, TLX2, ID1, CIT, NFATC4	2104	11	18082	3.90641	1	0.295766	0.28031
GOTERM_BP_DIRECT	GO:0061028	establishment of endothelial barrier	0.254022	0.03081	SOX18, PDE2A, MYADM, MSN, RAPGEF3, ICAM1	2104	16	18082	3.22279	1	0.295766	0.28031
GOTERM_BP_DIRECT	GO:0061036	positive regulation of cartilage development	0.254022	0.03081	BMP4, BMP2, WNT5A, SOX6, CYR61, SOX5	2104	16	18082	3.22279	1	0.295766	0.28031
GOTERM_BP_DIRECT	GO:0033700	phospholipid efflux	0.254022	0.03081	APOC2, APOA2, APOC3, APOA1, APOA4, APOE	2104	16	18082	3.22279	1	0.295766	0.28031
GOTERM_BP_DIRECT	GO:0031103	axon regeneration	0.254022	0.03081	JUN, BCL2, APOA1, RTN4RL2, NREP, APOE	2104	16	18082	3.22279	1	0.295766	0.28031
GOTERM_BP_DIRECT	GO:0042953	lipoprotein transport	0.254022	0.03081	CUBN, MSR1, APOC2, APOC3, LRP2, CD36	2104	16	18082	3.22279	1	0.295766	0.28031
GOTERM_BP_DIRECT	GO:0006939	smooth muscle contraction	0.254022	0.03081	CHRNB4, HTR7, HTR2B, BDKRB2, MYH11, MYLK	2104	16	18082	3.22279	1	0.295766	0.28031
GOTERM_BP_DIRECT	GO:0001655	urogenital system development	0.254022	0.03081	HELLS, OSR1, NOG, EPHB2, GATA2, EPHB3	2104	16	18082	3.22279	1	0.295766	0.28031
GOTERM_BP_DIRECT	GO:2000406	positive regulation of T cell migration	0.254022	0.03081	CXCL12, ITGB3, ADAM8, LGALS9, AIF1, CCL21A	2104	16	18082	3.22279	1	0.295766	0.28031
GOTERM_BP_DIRECT	GO:0060322	head development	0.254022	0.03081	OSR2, EDNRA, FLRT3, IL11RA1, STRA6, GLI2	2104	16	18082	3.22279	1	0.295766	0.28031
GOTERM_BP_DIRECT	GO:0001578	microtubule bundle formation	0.338696	0.0310988	TPPP3, CAPN6, PRC1, FES, NCKAP5L, PLK1, KIF20A, TPPP	2104	27	18082	2.5464	1	0.298043	0.282468
GOTERM_BP_DIRECT	GO:0034605	cellular response to heat	0.42337	0.0319601	LYN, IL1A, RASA3, SCARA5, STAC, TRPV4, TFEC, SLC52A3, MKI67, FGF1	2104	39	18082	2.20362	1	0.305489	0.289524
GOTERM_BP_DIRECT	GO:0032467	positive regulation of cytokinesis	0.381033	0.0320343	KIF14, KIF23, CDC6, KIF20B, ECT2, AURKB, CIT, SSTR5, CDC25B	2104	33	18082	2.34385	1	0.305489	0.289524
GOTERM_BP_DIRECT	GO:0071345	cellular response to cytokine stimulus	0.381033	0.0320343	CD86, CSF1R, FOXF1, FLT3, DPYSL3, HCLS1, CXCR4, CCR7, GATA3	2104	33	18082	2.34385	1	0.305489	0.289524
GOTERM_BP_DIRECT	GO:0043087	regulation of GTPase activity	0.635055	0.0324708	EPHA5, EPHA4, RASAL1, ADAP1, IQGAP3, VAV1, RASGRP3, RASA3, PLXNB3, AGRN, AJUBA, EPHA3, PRKG1, DGKI, EPHB3	2104	71	18082	1.81566	1	0.309141	0.292986
GOTERM_BP_DIRECT	GO:0043588	skin development	0.550381	0.0326736	RYR1, TCF7L1, BCL11B, TCF15, PTCH2, ARRDC3, SOX21, COL1A1, ADAMTS2, COL3A1, COL5A1, COL5A2, LTB	2104	58	18082	1.92627	1	0.310094	0.293889
GOTERM_BP_DIRECT	GO:0002244	hematopoietic progenitor cell differentiation	0.804403	0.0326782	TOP2A, PDGFRA, TGFB1, TNFRSF13B, FST, TMEM190, PLD4, STON2, INHBA, ESCO2, THSD1, TMEM91, BMP4, ANLN, REST, SFRP1, PTPRC, KCP, DOCK1	2104	98	18082	1.6662	1	0.310094	0.293889
GOTERM_BP_DIRECT	GO:0045892	negative regulation of transcription, DNA-templated	3.51397	0.0334545	PRDM8, SPI1, CITED1, PRDM6, PRDM5, HMGB2, LOXL3, FHL2, BRCA1, IKZF1, FOXM1, TNF, GLI3, TRIM6, SOX18, BASP1, MYB, HEY2, SOX8, HOXA7, SOX6, SOX7, SOX5, WNT5A, PAX4, SOX10, DKK3, GREM1, AR, SFRP1, SFRP2, DEPDC1A, SMO, MDFIC, HAND1, TIMELESS, BIRC5, AHRR, ZP3, ZFPM2, GAS6, ZFP423, RAMP3, ZFP703, TMPRSS6, NR1I2, GATA6, PDGFB, TWIST2, TWIST1, BHLHE22, GATA3, FOXS1, WNT11, RASD1, PRDM16, ATOH8, MSX1, BE…	2104	579	18082	1.23197	1	0.31694	0.300377
GOTERM_BP_DIRECT	GO:0071260	cellular response to mechanical stimulus	0.677392	0.0337008	TGFB1, CAV1, PDE2A, CYBA, PTGS2, BMP6, AQP1, COL1A1, CNN2, MAG, EDNRA, GJA1, TLR8, TLR7, NOS1, ENG	2104	78	18082	1.76289	1	0.318751	0.302094
GOTERM_BP_DIRECT	GO:0032755	positive regulation of interleukin-6 production	0.508044	0.0343873	P2RX7, IL33, IL1A, IL6, IL1RL2, WNT5A, CYBA, TLR7, NOD2, CD36, TNF, CRHR2	2104	52	18082	1.98326	1	0.324183	0.307242
GOTERM_BP_DIRECT	GO:0031532	actin cytoskeleton reorganization	0.508044	0.0343873	FGF7, ANXA1, PARVG, PTK7, TRPV4, KIT, S1PR1, FLNA, S1PR2, ANTXR1, S100A9, FGF10	2104	52	18082	1.98326	1	0.324183	0.307242
GOTERM_BP_DIRECT	GO:0032148	activation of protein kinase B activity	0.296359	0.0354912	WNT5A, NTF3, PDGFB, IGF1, FGF1, GAS6, ADRA2B	2104	22	18082	2.73449	1	0.325278	0.30828
GOTERM_BP_DIRECT	GO:0022617	extracellular matrix disassembly	0.296359	0.0354912	LAMA1, SH3PXD2B, MMP19, LAMB1, PLG, LAMC1, NID1	2104	22	18082	2.73449	1	0.325278	0.30828
GOTERM_BP_DIRECT	GO:0035924	cellular response to vascular endothelial growth factor stimulus	0.296359	0.0354912	NRP1, NR4A1, VCAM1, FLT1, FLT4, KDR, GAS1	2104	22	18082	2.73449	1	0.325278	0.30828
GOTERM_BP_DIRECT	GO:0009948	anterior/posterior axis specification	0.296359	0.0354912	BMP4, SIX2, HEY2, GPC3, TBX18, CER1, AURKA	2104	22	18082	2.73449	1	0.325278	0.30828
GOTERM_BP_DIRECT	GO:0032332	positive regulation of chondrocyte differentiation	0.296359	0.0354912	MUSTN1, FGF18, SOX6, GDF6, BMP6, GLI3, SOX5	2104	22	18082	2.73449	1	0.325278	0.30828
GOTERM_BP_DIRECT	GO:0043011	myeloid dendritic cell differentiation	0.296359	0.0354912	CD86, BATF3, SPI1, TGFB1, PIRB, BATF, TGFBR2	2104	22	18082	2.73449	1	0.325278	0.30828
GOTERM_BP_DIRECT	GO:0042246	tissue regeneration	0.296359	0.0354912	IGFBP1, IGSF10, GAP43, CCNB1, MUSTN1, PLG, FGF10	2104	22	18082	2.73449	1	0.325278	0.30828
GOTERM_BP_DIRECT	GO:0046579	positive regulation of Ras protein signal transduction	0.296359	0.0354912	KITL, ERBB2, MMD2, IGF1, NGF, DGKI, FGF10	2104	22	18082	2.73449	1	0.325278	0.30828
GOTERM_BP_DIRECT	GO:0006813	potassium ion transport	0.973751	0.0360359	KCNE3, KCNJ8, KCNK9, KCNE4, KCNA1, KCNH8, KCNJ14, KCNA3, ATP1A4, ABCC9, KCNK16, KCNA5, KCNAB1, ATP12A, AQP1, KCNT1, KCNT2, GJA5, CDK2, KCNMB4, KCNK2, SLC12A7, KCNK3	2104	127	18082	1.55641	1	0.325278	0.30828
GOTERM_BP_DIRECT	GO:0007156	homophilic cell adhesion via plasma membrane adhesion molecules	1.18544	0.0367844	PCDH10, PCDH12, PCDH19, PCDH18, IGSF9, PCDH17, CDH6, CDH5, CDH3, CDH23, CDH24, CDH26, CADM3, PCDH7, PCDH20, PCDH8, SDK1, CDHR2, PLXNB3, CDH12, CDH13, ESAM, CDHR5, DCHS1, FAT4, PCDHB3, CDH17, PCDHB7	2104	163	18082	1.47629	1	0.325278	0.30828
GOTERM_BP_DIRECT	GO:0031623	receptor internalization	0.42337	0.0371294	GRIA1, CALCRL, RAMP3, RAB31, CAV1, ITGB2, ACKR3, CD9, ADM, CD36	2104	40	18082	2.14853	1	0.325278	0.30828
GOTERM_BP_DIRECT	GO:0045787	positive regulation of cell cycle	0.42337	0.0371294	TGM1, TGFB2, CENPF, CCNB1, NR4A3, MYC, BIRC5, FGFR2, TBX3, FGFR1	2104	40	18082	2.14853	1	0.325278	0.30828
GOTERM_BP_DIRECT	GO:0048568	embryonic organ development	0.42337	0.0371294	PDGFRB, SMO, SOX17, WNT7B, GATA3, ZFPM2, POLE, FGFR2, GLI3, ZFP36L1	2104	40	18082	2.14853	1	0.325278	0.30828
GOTERM_BP_DIRECT	GO:0010159	specification of organ position	0.127011	0.0374201	BMP4, HOXA3, TBX3	2104	3	18082	8.59411	1	0.325278	0.30828
GOTERM_BP_DIRECT	GO:0045026	plasma membrane fusion	0.127011	0.0374201	TIE1, TMEM8C, VASH2	2104	3	18082	8.59411	1	0.325278	0.30828
GOTERM_BP_DIRECT	GO:0071409	cellular response to cycloheximide	0.127011	0.0374201	MYC, KLF4, KLF2	2104	3	18082	8.59411	1	0.325278	0.30828
GOTERM_BP_DIRECT	GO:0051873	killing by host of symbiont cells	0.127011	0.0374201	MBL1, CAMP, MBL2	2104	3	18082	8.59411	1	0.325278	0.30828
GOTERM_BP_DIRECT	GO:0051250	negative regulation of lymphocyte activation	0.127011	0.0374201	AXL, TYRO3, MERTK	2104	3	18082	8.59411	1	0.325278	0.30828
GOTERM_BP_DIRECT	GO:0071603	endothelial cell-cell adhesion	0.127011	0.0374201	NOV, CYP1B1, THBS4	2104	3	18082	8.59411	1	0.325278	0.30828
GOTERM_BP_DIRECT	GO:1903375	facioacoustic ganglion development	0.127011	0.0374201	NRP1, NRP2, SEMA3A	2104	3	18082	8.59411	1	0.325278	0.30828
GOTERM_BP_DIRECT	GO:0060638	mesenchymal-epithelial cell signaling	0.127011	0.0374201	WNT2B, WNT5A, HOXA5	2104	3	18082	8.59411	1	0.325278	0.30828
GOTERM_BP_DIRECT	GO:0010643	cell communication by chemical coupling	0.127011	0.0374201	GJA1, GJA5, DBN1	2104	3	18082	8.59411	1	0.325278	0.30828
GOTERM_BP_DIRECT	GO:1904996	positive regulation of leukocyte adhesion to vascular endothelial cell	0.127011	0.0374201	TNF, ETS1, ICAM1	2104	3	18082	8.59411	1	0.325278	0.30828
GOTERM_BP_DIRECT	GO:0072277	metanephric glomerular capillary formation	0.127011	0.0374201	PDGFRB, PDGFRA, TCF21	2104	3	18082	8.59411	1	0.325278	0.30828
GOTERM_BP_DIRECT	GO:0050855	regulation of B cell receptor signaling pathway	0.127011	0.0374201	LYN, PTPRC, GCSAM	2104	3	18082	8.59411	1	0.325278	0.30828
GOTERM_BP_DIRECT	GO:0090500	endocardial cushion to mesenchymal transition	0.127011	0.0374201	ACVRL1, HAS2, ENG	2104	3	18082	8.59411	1	0.325278	0.30828
GOTERM_BP_DIRECT	GO:0003402	planar cell polarity pathway involved in axis elongation	0.127011	0.0374201	VANGL2, WNT11, WNT5A	2104	3	18082	8.59411	1	0.325278	0.30828
GOTERM_BP_DIRECT	GO:0048866	stem cell fate specification	0.127011	0.0374201	CENPF, SOX17, SOX18	2104	3	18082	8.59411	1	0.325278	0.30828
GOTERM_BP_DIRECT	GO:0021828	gonadotrophin-releasing hormone neuronal migration to the hypothalamus	0.127011	0.0374201	NRP1, NRP2, SEMA3A	2104	3	18082	8.59411	1	0.325278	0.30828
GOTERM_BP_DIRECT	GO:0002291	T cell activation via T cell receptor contact with antigen bound to MHC molecule on antigen presenting cell	0.127011	0.0374201	APBB1IP, ITGAL, ICAM1	2104	3	18082	8.59411	1	0.325278	0.30828
GOTERM_BP_DIRECT	GO:0010903	negative regulation of very-low-density lipoprotein particle remodeling	0.127011	0.0374201	APOA2, APOC3, APOA1	2104	3	18082	8.59411	1	0.325278	0.30828
GOTERM_BP_DIRECT	GO:0072138	mesenchymal cell proliferation involved in ureteric bud development	0.127011	0.0374201	BMP4, BMP2, GPC3	2104	3	18082	8.59411	1	0.325278	0.30828
GOTERM_BP_DIRECT	GO:0035284	brain segmentation	0.127011	0.0374201	EGR2, MAFB, HOXA2	2104	3	18082	8.59411	1	0.325278	0.30828
GOTERM_BP_DIRECT	GO:0032651	regulation of interleukin-1 beta production	0.127011	0.0374201	SPHK1, F2R, S1PR3	2104	3	18082	8.59411	1	0.325278	0.30828
GOTERM_BP_DIRECT	GO:0043932	ossification involved in bone remodeling	0.127011	0.0374201	TGFB1, TGFB3, CTHRC1	2104	3	18082	8.59411	1	0.325278	0.30828
GOTERM_BP_DIRECT	GO:0032374	regulation of cholesterol transport	0.127011	0.0374201	LRP1, APOA4, APOE	2104	3	18082	8.59411	1	0.325278	0.30828
GOTERM_BP_DIRECT	GO:0046546	development of primary male sexual characteristics	0.127011	0.0374201	SFRP1, SFRP2, WNT5A	2104	3	18082	8.59411	1	0.325278	0.30828
GOTERM_BP_DIRECT	GO:2000721	positive regulation of transcription from RNA polymerase II promoter involved in smooth muscle cell differentiation	0.127011	0.0374201	MYOCD, ITGA8, NPNT	2104	3	18082	8.59411	1	0.325278	0.30828
GOTERM_BP_DIRECT	GO:0031577	spindle checkpoint	0.127011	0.0374201	BIRC5, SPDL1, AURKB	2104	3	18082	8.59411	1	0.325278	0.30828
GOTERM_BP_DIRECT	GO:0035108	limb morphogenesis	0.338696	0.0374353	FBN2, WNT5A, LRP5, LMX1B, PCSK5, TBX3, GLI3, FGF10	2104	28	18082	2.45546	1	0.325278	0.30828
GOTERM_BP_DIRECT	GO:0050873	brown fat cell differentiation	0.381033	0.0377638	PLAC8, SELENBP1, FABP4, LAMA4, RARRES2, PRDM16, EBF2, SLC2A4, PTGS2	2104	34	18082	2.27491	1	0.325278	0.30828
GOTERM_BP_DIRECT	GO:0007257	activation of JUN kinase activity	0.381033	0.0377638	DAB2, MDFIC, WNT7B, WNT5A, GAB1, TNFSF11, TRF, CCR7, MDFI	2104	34	18082	2.27491	1	0.325278	0.30828
GOTERM_BP_DIRECT	GO:0043123	positive regulation of I-kappaB kinase/NF-kappaB signaling	1.10076	0.0377995	ECM1, CLEC4N, HTR2B, LPAR1, NOD2, TNF, GJA1, LGALS1, TSPAN6, FLNA, TNFSF11, CD36, ECT2, CCL21A, TGM2, SECTM1A, F2R, TNFRSF19, RHOC, S100B, BST2, IL1A, GPRC5B, TLR6, AJUBA, LTF	2104	149	18082	1.49964	1	0.325278	0.30828
GOTERM_BP_DIRECT	GO:0030900	forebrain development	0.719729	0.0381184	NOTCH3, STIL, NUMBL, NR2F1, LRP2, NR2F2, IKZF1, SSTR4, GLI3, BMP4, RELN, NFIB, DLC1, ALDH1A2, GSC, MSX1, PRKG1	2104	86	18082	1.69883	1	0.325278	0.30828
GOTERM_BP_DIRECT	GO:0030036	actin cytoskeleton organization	1.05843	0.0382356	PRR5, WIPF1, PDGFB, CORO1A, AMOT, CSRP1, ABLIM3, NRAP, RAC2, FLNA, CCR7, TMSB10, PDLIM7, GAS2L3, FMNL3, EHD2, SFRP1, FMNL1, INF2, DAAM2, DLC1, RHOJ, FSCN1, CDC42EP2, DOCK2	2104	142	18082	1.51305	1	0.325278	0.30828
GOTERM_BP_DIRECT	GO:0034616	response to laminar fluid shear stress	0.169348	0.0383309	TGFB1, TGFB3, SMAD6, ETS1	2104	7	18082	4.91092	1	0.325278	0.30828
GOTERM_BP_DIRECT	GO:0010837	regulation of keratinocyte proliferation	0.169348	0.0383309	YAP1, ZFP36, BCL11B, ZFP36L1	2104	7	18082	4.91092	1	0.325278	0.30828
GOTERM_BP_DIRECT	GO:0034372	very-low-density lipoprotein particle remodeling	0.169348	0.0383309	LIPC, APOA1, APOA4, APOE	2104	7	18082	4.91092	1	0.325278	0.30828
GOTERM_BP_DIRECT	GO:0010544	negative regulation of platelet activation	0.169348	0.0383309	PDGFRA, SERPINE2, PDGFB, APOE	2104	7	18082	4.91092	1	0.325278	0.30828
GOTERM_BP_DIRECT	GO:0060510	Type II pneumocyte differentiation	0.169348	0.0383309	NFIB, GATA6, IGF1, FGF10	2104	7	18082	4.91092	1	0.325278	0.30828
GOTERM_BP_DIRECT	GO:0001867	complement activation, lectin pathway	0.169348	0.0383309	FCNA, MASP1, MBL1, MBL2	2104	7	18082	4.91092	1	0.325278	0.30828
GOTERM_BP_DIRECT	GO:0034382	chylomicron remnant clearance	0.169348	0.0383309	LIPC, APOC2, APOC3, APOE	2104	7	18082	4.91092	1	0.325278	0.30828
GOTERM_BP_DIRECT	GO:0043931	ossification involved in bone maturation	0.169348	0.0383309	RYR1, DCHS1, FAT4, THBS3	2104	7	18082	4.91092	1	0.325278	0.30828
GOTERM_BP_DIRECT	GO:0051988	regulation of attachment of spindle microtubules to kinetochore	0.169348	0.0383309	SPAG5, NEK2, ECT2, KNSTRN	2104	7	18082	4.91092	1	0.325278	0.30828
GOTERM_BP_DIRECT	GO:0014031	mesenchymal cell development	0.169348	0.0383309	HEYL, FOXC1, HEY2, BCL2	2104	7	18082	4.91092	1	0.325278	0.30828
GOTERM_BP_DIRECT	GO:0040036	regulation of fibroblast growth factor receptor signaling pathway	0.169348	0.0383309	HHIP, SULF1, DUSP6, FGFR2	2104	7	18082	4.91092	1	0.325278	0.30828
GOTERM_BP_DIRECT	GO:0001955	blood vessel maturation	0.169348	0.0383309	CDH5, LYL1, MMP2, S1PR1	2104	7	18082	4.91092	1	0.325278	0.30828
GOTERM_BP_DIRECT	GO:2001046	positive regulation of integrin-mediated signaling pathway	0.169348	0.0383309	DAB2, FLNA, EMP2, LIMS2	2104	7	18082	4.91092	1	0.325278	0.30828
GOTERM_BP_DIRECT	GO:0048070	regulation of developmental pigmentation	0.169348	0.0383309	KIT, BCL2, ADAMTS9, ADAMTS20	2104	7	18082	4.91092	1	0.325278	0.30828
GOTERM_BP_DIRECT	GO:0050861	positive regulation of B cell receptor signaling pathway	0.169348	0.0383309	LYN, PRKCH, CMTM3, NFAM1	2104	7	18082	4.91092	1	0.325278	0.30828
GOTERM_BP_DIRECT	GO:0042035	regulation of cytokine biosynthetic process	0.169348	0.0383309	PRG2, ADAM33, GATA3, S100B	2104	7	18082	4.91092	1	0.325278	0.30828
GOTERM_BP_DIRECT	GO:2000096	positive regulation of Wnt signaling pathway, planar cell polarity pathway	0.169348	0.0383309	DAB2, GPC3, NKD1, ANKRD6	2104	7	18082	4.91092	1	0.325278	0.30828
GOTERM_BP_DIRECT	GO:0048539	bone marrow development	0.169348	0.0383309	PTPRC, LRRC17, HOXB4, LRP5	2104	7	18082	4.91092	1	0.325278	0.30828
GOTERM_BP_DIRECT	GO:0032754	positive regulation of interleukin-5 production	0.169348	0.0383309	IL33, IL1RL1, NLRP3, GATA3	2104	7	18082	4.91092	1	0.325278	0.30828
GOTERM_BP_DIRECT	GO:0032466	negative regulation of cytokinesis	0.169348	0.0383309	CHMP4C, E2F7, AURKB, E2F8	2104	7	18082	4.91092	1	0.325278	0.30828
GOTERM_BP_DIRECT	GO:0050869	negative regulation of B cell activation	0.169348	0.0383309	BANK1, INPP5D, TBC1D10C, SAMSN1	2104	7	18082	4.91092	1	0.325278	0.30828
GOTERM_BP_DIRECT	GO:0060028	convergent extension involved in axis elongation	0.169348	0.0383309	VANGL2, WNT11, SFRP2, WNT5A	2104	7	18082	4.91092	1	0.325278	0.30828
GOTERM_BP_DIRECT	GO:0021957	corticospinal tract morphogenesis	0.169348	0.0383309	PRDM8, EPHA4, ZEB2, BHLHE22	2104	7	18082	4.91092	1	0.325278	0.30828
GOTERM_BP_DIRECT	GO:0006182	cGMP biosynthetic process	0.254022	0.0395817	GUCY1A3, GUCY1B3, NPPC, HTR2B, GUCA2B, AQP1	2104	17	18082	3.03321	1	0.334419	0.316943
GOTERM_BP_DIRECT	GO:0002526	acute inflammatory response	0.254022	0.0395817	IL6, VCAM1, ALOX5, APOA2, CXCL1, S100A8	2104	17	18082	3.03321	1	0.334419	0.316943
GOTERM_BP_DIRECT	GO:0050832	defense response to fungus	0.254022	0.0395817	NCF1, CLEC4N, COTL1, CTSG, MPO, ELANE	2104	17	18082	3.03321	1	0.334419	0.316943
GOTERM_BP_DIRECT	GO:0007566	embryo implantation	0.550381	0.0413475	TEAD4, PTGIS, MMP2, PZP, LIF, FBLN1, EMP2, LAMB1, PTGS2, MMP9, PCSK5, TGFBR2, IGFBP7	2104	60	18082	1.86206	1	0.348828	0.330599
GOTERM_BP_DIRECT	GO:0030509	BMP signaling pathway	0.719729	0.0418566	GDF10, ACVRL1, EGR1, RYR2, FST, NOG, GDF1, SMAD6, GDF6, BMP6, BMP5, RGMA, TMEM100, BMP4, BMP2, ID1, MSX1	2104	87	18082	1.67931	1	0.350268	0.331964
GOTERM_BP_DIRECT	GO:0030857	negative regulation of epithelial cell differentiation	0.211685	0.0419425	YAP1, SMO, CAV1, OSR1, TBX3	2104	12	18082	3.58088	1	0.350268	0.331964
GOTERM_BP_DIRECT	GO:0060391	positive regulation of SMAD protein import into nucleus	0.211685	0.0419425	BMP4, DAB2, TGFB1, TGFB3, BMP6	2104	12	18082	3.58088	1	0.350268	0.331964
GOTERM_BP_DIRECT	GO:0033089	positive regulation of T cell differentiation in thymus	0.211685	0.0419425	TESPA1, ADAM8, IL7R, IL2RG, GLI2	2104	12	18082	3.58088	1	0.350268	0.331964
GOTERM_BP_DIRECT	GO:1904322	cellular response to forskolin	0.211685	0.0419425	EPHA5, AKR1C18, ADCY2, ADCY1, ADCY5	2104	12	18082	3.58088	1	0.350268	0.331964
GOTERM_BP_DIRECT	GO:0070848	response to growth factor	0.211685	0.0419425	ANXA3, LUM, GATA6, DUSP6, EPHA2	2104	12	18082	3.58088	1	0.350268	0.331964
GOTERM_BP_DIRECT	GO:0060740	prostate gland epithelium morphogenesis	0.211685	0.0419425	AR, MMP2, ID4, TNC, IGF1	2104	12	18082	3.58088	1	0.350268	0.331964
GOTERM_BP_DIRECT	GO:0006937	regulation of muscle contraction	0.296359	0.0434438	RYR1, CHRNA3, TNNT2, KCNA1, TNNI2, ADRA1B, ADRA1A	2104	23	18082	2.6156	1	0.362282	0.34335
GOTERM_BP_DIRECT	GO:0030512	negative regulation of transforming growth factor beta receptor signaling pathway	0.508044	0.044022	TGFB3, CAV2, CD109, CAV1, PEG10, TGFB1I1, HTRA3, PRDM16, ADAMTSL2, HTRA1, SMAD6, ASPN	2104	54	18082	1.9098	1	0.365985	0.34686
GOTERM_BP_DIRECT	GO:0090307	mitotic spindle assembly	0.381033	0.0441412	CDC20, TPX2, KIFC1, KIFC5B, FLNA, BIRC5, NEK2, MYBL2, KIF11	2104	35	18082	2.20991	1	0.365985	0.34686
GOTERM_BP_DIRECT	GO:0051480	regulation of cytosolic calcium ion concentration	0.381033	0.0441412	RYR1, RYR2, TRPC3, CAV1, CDH23, HRC, PDE6B, F2, PLCD1	2104	35	18082	2.20991	1	0.365985	0.34686
GOTERM_BP_DIRECT	GO:0031069	hair follicle morphogenesis	0.381033	0.0441412	TGFB2, FGF7, SMO, KRT27, FST, SNAI1, BCL2, FGFR2, FGF10	2104	35	18082	2.20991	1	0.365985	0.34686
GOTERM_BP_DIRECT	GO:0016042	lipid catabolic process	0.84674	0.0461761	PLA2G12B, APOC3, PLD4, PLA2G4A, PLD2, PLA2G16, ACAP1, LIPC, APOC2, ASPG, LIPG, PLCE1, PLBD1, PLCH2, LIPK, SMPDL3B, PLCB2, MGLL, PLCD1, PLA1A	2104	109	18082	1.5769	1	0.382263	0.362287
GOTERM_BP_DIRECT	GO:0032091	negative regulation of protein binding	0.550381	0.0462367	ACE, CAV1, WFIKKN2, CCM2L, PDGFB, AURKB, AURKA, IFIT2, NFATC4, DAB2, TDG, MYC, ID1	2104	61	18082	1.83153	1	0.382263	0.362287
GOTERM_BP_DIRECT	GO:0055072	iron ion homeostasis	0.42337	0.0491137	STEAP3, STEAP4, HEPH, SCARA5, TMPRSS6, EPAS1, SLC11A1, LCN2, TRF, LTF	2104	42	18082	2.04622	1	0.405469	0.38428
GOTERM_BP_DIRECT	GO:0035914	skeletal muscle cell differentiation	0.508044	0.0494721	EGR1, HEYL, NR4A1, EGR2, MEF2C, PLAGL1, MYC, SOX8, SOX11, FOS, ASB2, PHOX2B	2104	55	18082	1.87508	1	0.406986	0.385718
GOTERM_BP_DIRECT	GO:0060216	definitive hemopoiesis	0.254022	0.0497201	MFAP5, LYL1, TAL1, HOXB4, MPL, GATA2	2104	18	18082	2.8647	1	0.406986	0.385718
GOTERM_BP_DIRECT	GO:0001774	microglial cell activation	0.254022	0.0497201	CX3CR1, JUN, TLR8, TLR7, TLR6, AIF1	2104	18	18082	2.8647	1	0.406986	0.385718
GOTERM_BP_DIRECT	GO:0002063	chondrocyte development	0.254022	0.0497201	SFRP2, CHSY1, COL11A1, FGF18, SULF1, SULF2	2104	18	18082	2.8647	1	0.406986	0.385718
GOTERM_BP_DIRECT	GO:0006790	sulfur compound metabolic process	0.254022	0.0497201	CHST8, CHST7, CHST1, SULF1, CHST4, SULF2	2104	18	18082	2.8647	1	0.406986	0.385718
GOTERM_BP_DIRECT	GO:0050930	induction of positive chemotaxis	0.254022	0.0497201	CXCL12, NTF3, VEGFC, IL16, CCL21A, FGF10	2104	18	18082	2.8647	1	0.406986	0.385718
GOTERM_BP_DIRECT	GO:0048015	phosphatidylinositol-mediated signaling	0.381033	0.0511875	PDGFRB, CSF1R, PDGFRA, NPR3, NCS1, IGF1, NGF, ZP3, PIRT	2104	36	18082	2.14853	1	0.417814	0.39598
GOTERM_BP_DIRECT	GO:0048008	platelet-derived growth factor receptor signaling pathway	0.381033	0.0511875	PDGFRB, PDGFRA, NRP1, RGS14, ITGB3, GAB1, PDGFB, ARID5B, PLAT	2104	36	18082	2.14853	1	0.417814	0.39598
GOTERM_BP_DIRECT	GO:0006270	DNA replication initiation	0.296359	0.0524254	CDC45, MCM3, CDC7, MCM5, MCM10, MCM6, CDC6	2104	24	18082	2.50661	1	0.423215	0.401099
GOTERM_BP_DIRECT	GO:0060441	epithelial tube branching involved in lung morphogenesis	0.296359	0.0524254	BMP4, LAMA1, FOXF1, HHIP, FGFR2, HOXA5, FGF10	2104	24	18082	2.50661	1	0.423215	0.401099
GOTERM_BP_DIRECT	GO:0009987	cellular process	0.296359	0.0524254	AR, FMNL1, JUN, TUBB5, PTTG1, JUNB, FLI1	2104	24	18082	2.50661	1	0.423215	0.401099
GOTERM_BP_DIRECT	GO:0034394	protein localization to cell surface	0.296359	0.0524254	FGF7, WNT11, FLNA, EMP2, FBLN5, GPIHBP1, FGF10	2104	24	18082	2.50661	1	0.423215	0.401099
GOTERM_BP_DIRECT	GO:0030511	positive regulation of transforming growth factor beta receptor signaling pathway	0.296359	0.0524254	CDKN1C, MYOCD, DAB2, TGFB1I1, ITGA8, NPNT, THBS1	2104	24	18082	2.50661	1	0.423215	0.401099
GOTERM_BP_DIRECT	GO:0045216	cell-cell junction organization	0.296359	0.0524254	TGFB2, GJA1, TGFB1, TGFB3, FLNA, CLDN1, LIMS2	2104	24	18082	2.50661	1	0.423215	0.401099
GOTERM_BP_DIRECT	GO:0051928	positive regulation of calcium ion transport	0.338696	0.0525083	CCR1, EDNRA, TRPC6, F2R, CCL4, CCL3, MCHR1, MYLK	2104	30	18082	2.29176	1	0.423215	0.401099
GOTERM_BP_DIRECT	GO:0009314	response to radiation	0.338696	0.0525083	COL3A1, JUN, ANGPT2, CXCL12, MYC, KIT, SNAI2, JUNB	2104	30	18082	2.29176	1	0.423215	0.401099
GOTERM_BP_DIRECT	GO:0007569	cell aging	0.338696	0.0525083	CDK1, BCL2, NOX4, PRELP, BRCA2, TBX3, ICAM1, TBX2	2104	30	18082	2.29176	1	0.423215	0.401099
GOTERM_BP_DIRECT	GO:0006357	regulation of transcription from RNA polymerase II promoter	2.45555	0.0541342	ECM1, SPI1, CITED1, BNC1, HMGB2, FHL2, LDB2, IKZF1, ETS1, ZFP36, HEY2, HOXA1, MYBL2, PITX2, HMGN2, SOX7, JUNB, PKNOX2, TEAD4, BATF3, MYOCD, ARID5B, FOS, POU3F4, AR, RFX8, TAL1, CKS2, IRF5, LMX1B, ERG, JDP2, DLX1, DLX2, TCF7, TWIST2, GATA3, BARX1, ASCL2, ZFP541, NFE2, TCF7L1, IFI204, NR2F2, INHBA, KLF4, ISX, BATF, HEYL, REST, MAFB, TLX2, WT1, FEV, SNAI1, FOSB, NFKBID, EZH2	2104	397	18082	1.25556	1	0.431318	0.408778
GOTERM_BP_DIRECT	GO:0060317	cardiac epithelial to mesenchymal transition	0.211685	0.0551608	HEYL, TGFB2, BMP2, HEY2, WNT2	2104	13	18082	3.30543	1	0.431318	0.408778
GOTERM_BP_DIRECT	GO:0030212	hyaluronan metabolic process	0.211685	0.0551608	ITIH5, ITIH3, HGF, HAS2, MKI67	2104	13	18082	3.30543	1	0.431318	0.408778
GOTERM_BP_DIRECT	GO:0070528	protein kinase C signaling	0.211685	0.0551608	MAS1, PRKCH, HTR2B, PDGFB, ZP3	2104	13	18082	3.30543	1	0.431318	0.408778
GOTERM_BP_DIRECT	GO:0043117	positive regulation of vascular permeability	0.211685	0.0551608	TGFB1, TRPV4, PDE2A, CCL4, PDE3A	2104	13	18082	3.30543	1	0.431318	0.408778
GOTERM_BP_DIRECT	GO:0003215	cardiac right ventricle morphogenesis	0.211685	0.0551608	BMP4, TGFB2, JAG1, HEY2, GATA3	2104	13	18082	3.30543	1	0.431318	0.408778
GOTERM_BP_DIRECT	GO:0006940	regulation of smooth muscle contraction	0.211685	0.0551608	CHRM2, CHRNA3, CHRNB4, CAV1, ADRA2B	2104	13	18082	3.30543	1	0.431318	0.408778
GOTERM_BP_DIRECT	GO:0043583	ear development	0.211685	0.0551608	TCF15, GSC, BCL2, GATA3, STRA6	2104	13	18082	3.30543	1	0.431318	0.408778
GOTERM_BP_DIRECT	GO:0003073	regulation of systemic arterial blood pressure	0.211685	0.0551608	ADAMTS16, AR, POSTN, DDAH1, GJA5	2104	13	18082	3.30543	1	0.431318	0.408778
GOTERM_BP_DIRECT	GO:0097194	execution phase of apoptosis	0.211685	0.0551608	CECR2, CASP7, CASP3, CIDEB, CIDEC	2104	13	18082	3.30543	1	0.431318	0.408778
GOTERM_BP_DIRECT	GO:0021675	nerve development	0.211685	0.0551608	NRP1, NRP2, SEMA3A, NTF3, SEMA3F	2104	13	18082	3.30543	1	0.431318	0.408778
GOTERM_BP_DIRECT	GO:0007076	mitotic chromosome condensation	0.211685	0.0551608	CDCA5, NUSAP1, NCAPG, NCAPH, SMC2	2104	13	18082	3.30543	1	0.431318	0.408778
GOTERM_BP_DIRECT	GO:0022407	regulation of cell-cell adhesion	0.211685	0.0551608	PODXL, NRARP, ADAM8, ITGAL, EPHB3	2104	13	18082	3.30543	1	0.431318	0.408778
GOTERM_BP_DIRECT	GO:0060389	pathway-restricted SMAD protein phosphorylation	0.211685	0.0551608	TGFB2, BMP2, TGFB1, GDF6, TGFBR2	2104	13	18082	3.30543	1	0.431318	0.408778
GOTERM_BP_DIRECT	GO:0044319	wound healing, spreading of cells	0.211685	0.0551608	TMEFF2, FLNA, SNAI2, RHOC, CYR61	2104	13	18082	3.30543	1	0.431318	0.408778
GOTERM_BP_DIRECT	GO:0060348	bone development	0.508044	0.0553604	BMP4, MMP14, SPARC, MMP16, SH3PXD2B, POC1A, LRP5, RARB, SULF1, FGFR2, SULF2, ENG	2104	56	18082	1.84159	1	0.431318	0.408778
GOTERM_BP_DIRECT	GO:0048341	paraxial mesoderm formation	0.169348	0.0561258	FOXC2, FOXC1, WNT11, WNT5A	2104	8	18082	4.29705	1	0.431318	0.408778
GOTERM_BP_DIRECT	GO:0001768	establishment of T cell polarity	0.169348	0.0561258	CYP26B1, CCR7, DOCK2, CCL21A	2104	8	18082	4.29705	1	0.431318	0.408778
GOTERM_BP_DIRECT	GO:0034392	negative regulation of smooth muscle cell apoptotic process	0.169348	0.0561258	EDN1, APOH, IGF1, AGTR1A	2104	8	18082	4.29705	1	0.431318	0.408778
GOTERM_BP_DIRECT	GO:0001776	leukocyte homeostasis	0.169348	0.0561258	FLT3, BCL2, CXCL5, NKX2-3	2104	8	18082	4.29705	1	0.431318	0.408778
GOTERM_BP_DIRECT	GO:1902533	positive regulation of intracellular signal transduction	0.169348	0.0561258	LRRK1, TNFSF11, TEK, FGF1	2104	8	18082	4.29705	1	0.431318	0.408778
GOTERM_BP_DIRECT	GO:0015670	carbon dioxide transport	0.169348	0.0561258	CAR2, CAR14, CAR12, AQP1	2104	8	18082	4.29705	1	0.431318	0.408778
GOTERM_BP_DIRECT	GO:0007223	Wnt signaling pathway, calcium modulating pathway	0.169348	0.0561258	FZD2, FZD4, WNT5A, PDE6B	2104	8	18082	4.29705	1	0.431318	0.408778
GOTERM_BP_DIRECT	GO:0072006	nephron development	0.169348	0.0561258	JAG1, SIX2, DCHS1, FAT4	2104	8	18082	4.29705	1	0.431318	0.408778
GOTERM_BP_DIRECT	GO:0014909	smooth muscle cell migration	0.169348	0.0561258	NOV, PLAU, ITGB3, PLAT	2104	8	18082	4.29705	1	0.431318	0.408778
GOTERM_BP_DIRECT	GO:0060485	mesenchyme development	0.169348	0.0561258	BMP2, BNC2, HAND2, HAND1	2104	8	18082	4.29705	1	0.431318	0.408778
GOTERM_BP_DIRECT	GO:0034383	low-density lipoprotein particle clearance	0.169348	0.0561258	SCARB1, DGAT2, LIPC, CD36	2104	8	18082	4.29705	1	0.431318	0.408778
GOTERM_BP_DIRECT	GO:0030853	negative regulation of granulocyte differentiation	0.169348	0.0561258	ZBTB46, INPP5D, PRDM16, C1QC	2104	8	18082	4.29705	1	0.431318	0.408778
GOTERM_BP_DIRECT	GO:0022612	gland morphogenesis	0.169348	0.0561258	BCL2, MSN, FGFR2, NKX2-3	2104	8	18082	4.29705	1	0.431318	0.408778
GOTERM_BP_DIRECT	GO:0010863	positive regulation of phospholipase C activity	0.169348	0.0561258	PDGFRB, PDGFRA, FLT1, FGFR1	2104	8	18082	4.29705	1	0.431318	0.408778
GOTERM_BP_DIRECT	GO:0060371	regulation of atrial cardiac muscle cell membrane depolarization	0.169348	0.0561258	GJA1, GJA5, SCN5A, CACNA1G	2104	8	18082	4.29705	1	0.431318	0.408778
GOTERM_BP_DIRECT	GO:0090091	positive regulation of extracellular matrix disassembly	0.169348	0.0561258	SEMA5A, TGFB2, FSCN1, DDR2	2104	8	18082	4.29705	1	0.431318	0.408778
GOTERM_BP_DIRECT	GO:0010518	positive regulation of phospholipase activity	0.169348	0.0561258	APOC2, HPCA, FGFR2, CYR61	2104	8	18082	4.29705	1	0.431318	0.408778
GOTERM_BP_DIRECT	GO:0060712	spongiotrophoblast layer development	0.169348	0.0561258	CITED1, ADM, ASCL2, ZFP36L1	2104	8	18082	4.29705	1	0.431318	0.408778
GOTERM_BP_DIRECT	GO:0090037	positive regulation of protein kinase C signaling	0.169348	0.0561258	WNT11, FLT4, WNT5A, ADRA1A	2104	8	18082	4.29705	1	0.431318	0.408778
GOTERM_BP_DIRECT	GO:0006816	calcium ion transport	1.01609	0.0587103	CCR1, RYR1, RYR2, CALCRL, TRPC6, RAMP3, TRPC3, CHRNA4, CAV1, ITPR3, CACNA2D4, CORO1A, CACNA1H, P2RX7, PANX1, CYSLTR1, GRIN3A, TRPV4, MYB, GJA4, CCL3, CDH23, NMUR1, CACNG5	2104	141	18082	1.46283	1	0.45058	0.427033
GOTERM_BP_DIRECT	GO:0055007	cardiac muscle cell differentiation	0.381033	0.0589192	BMP4, MYOCD, MEF2C, BMP2, GATA6, NOX4, PITX2, SOX6, TBX3	2104	37	18082	2.09046	1	0.450986	0.427418
GOTERM_BP_DIRECT	GO:0030177	positive regulation of Wnt signaling pathway	0.381033	0.0589192	DEPDC1B, ZEB2, SFRP1, BMP2, RSPO1, SULF1, FGFR2, FGF10, SULF2	2104	37	18082	2.09046	1	0.450986	0.427418
GOTERM_BP_DIRECT	GO:0035023	regulation of Rho protein signal transduction	0.635055	0.0590814	PLEKHG1, PLEKHG2, ARHGEF15, ARHGEF39, VAV1, TIAM2, PREX2, FGD5, OBSCN, DLC1, ARHGDIB, ARHGEF3, ECT2, ARHGEF40, ARHGEF6	2104	77	18082	1.67418	1	0.451629	0.428027
GOTERM_BP_DIRECT	GO:0006936	muscle contraction	0.465707	0.0593527	ACTA2, RYR1, ANXA1, ANXA2, ACTN3, STAC, TNNT2, TPM2, DYSF, LMOD1, SCN7A	2104	50	18082	1.8907	1	0.452326	0.428688
GOTERM_BP_DIRECT	GO:0060041	retina development in camera-type eye	0.677392	0.0594074	TGIF1, LAMA1, LAMB2, LAMC3, SERPINF1, HPCA, PAX4, LIF, PDGFB, TULP1, IKZF1, MERTK, C1QTNF5, RARB, SOX8, PDE6B	2104	84	18082	1.63697	1	0.452326	0.428688
GOTERM_BP_DIRECT	GO:0001933	negative regulation of protein phosphorylation	0.677392	0.0594074	LYN, WWTR1, TGFB1, KIRREL, SLFN1, IGFBP3, FBLN1, DUSP6, MAS1, CCNB1, CD109, MICAL1, PBK, MYADM, RGN, SLIT2	2104	84	18082	1.63697	1	0.452326	0.428688
GOTERM_BP_DIRECT	GO:0070208	protein heterotrimerization	0.254022	0.0612413	COL1A1, C1QTNF2, COL1A2, COL6A2, C1QTNF6, COL6A1	2104	19	18082	2.71393	1	0.46116	0.437061
GOTERM_BP_DIRECT	GO:0009607	response to biotic stimulus	0.254022	0.0612413	IFITM3, IFITM1, IFITM2, TMEM91, IFITM5, IFITM6	2104	19	18082	2.71393	1	0.46116	0.437061
GOTERM_BP_DIRECT	GO:0016339	calcium-dependent cell-cell adhesion via plasma membrane cell adhesion molecules	0.254022	0.0612413	CDH23, CDH13, PCDH12, PCDH18, AJUBA, CDH17	2104	19	18082	2.71393	1	0.46116	0.437061
GOTERM_BP_DIRECT	GO:0042346	positive regulation of NF-kappaB import into nucleus	0.254022	0.0612413	GREM1, SPHK1, TLR7, PRKCQ, PTGS2, TNF	2104	19	18082	2.71393	1	0.46116	0.437061
GOTERM_BP_DIRECT	GO:0006801	superoxide metabolic process	0.254022	0.0612413	NRROS, NCF2, SH3PXD2B, NOX4, CYBA, SOD3	2104	19	18082	2.71393	1	0.46116	0.437061
GOTERM_BP_DIRECT	GO:0050880	regulation of blood vessel size	0.254022	0.0612413	FOXC2, NPPC, FOXC1, EDN1, NTS, KNG1	2104	19	18082	2.71393	1	0.46116	0.437061
GOTERM_BP_DIRECT	GO:0030818	negative regulation of cAMP biosynthetic process	0.254022	0.0612413	EDNRA, EDN1, PDE2A, OPRL1, LPAR1, CRHR2	2104	19	18082	2.71393	1	0.46116	0.437061
GOTERM_BP_DIRECT	GO:0031663	lipopolysaccharide-mediated signaling pathway	0.338696	0.0612859	LYN, CCL12, TGFB1, CCL3, CCL2, TREM2, CD14, TNF	2104	31	18082	2.21783	1	0.46116	0.437061
GOTERM_BP_DIRECT	GO:0043029	T cell homeostasis	0.338696	0.0612859	P2RX7, CCNB2, TGFB1, RIPK3, CASP3, BCL2, PMAIP1, CORO1A	2104	31	18082	2.21783	1	0.46116	0.437061
GOTERM_BP_DIRECT	GO:0032526	response to retinoic acid	0.508044	0.0616967	PDGFRB, ACER2, DUSP1, TIE1, IGFBP2, CTSH, IGFBP7, TEK, KLF4, AQP3, MEST, BMP6	2104	57	18082	1.80929	1	0.463648	0.439419
GOTERM_BP_DIRECT	GO:0048593	camera-type eye morphogenesis	0.296359	0.0624532	BMP4, COL8A2, COL8A1, EPHB2, EPHB1, GLI3, AQP1	2104	25	18082	2.40635	1	0.466301	0.441933
GOTERM_BP_DIRECT	GO:0007585	respiratory gaseous exchange	0.296359	0.0624532	EDNRA, EDN1, MAFB, TRAF4, CHRNA4, FLT4, HOXA5	2104	25	18082	2.40635	1	0.466301	0.441933
GOTERM_BP_DIRECT	GO:0001816	cytokine production	0.296359	0.0624532	CD4, FABP4, MAF, S1PR3, PLA2R1, CXCL5, BATF	2104	25	18082	2.40635	1	0.466301	0.441933
GOTERM_BP_DIRECT	GO:0010800	positive regulation of peptidyl-threonine phosphorylation	0.296359	0.0624532	TRIM6, TRPC6, TGFB1, SPHK1, PLK1, WNT5A, S1PR2	2104	25	18082	2.40635	1	0.466301	0.441933
GOTERM_BP_DIRECT	GO:0043542	endothelial cell migration	0.296359	0.0624532	GREM1, FAP, PLXND1, ITGB2, PECAM1, CYP1B1, CDH13	2104	25	18082	2.40635	1	0.466301	0.441933
GOTERM_BP_DIRECT	GO:0007224	smoothened signaling pathway	0.592718	0.0641767	EVC2, STIL, DHH, FOXF1, HHIP, GLI1, GLI3, GLI2, TGFBR2, BMP4, EVC, SMO, BOC, GPC2	2104	71	18082	1.69461	1	0.478552	0.453543
GOTERM_BP_DIRECT	GO:0007528	neuromuscular junction development	0.381033	0.0673479	P2RX2, COL4A1, LAMB2, ERBB2, DOK7, TNC, COL4A5, AGRN, FGFR2	2104	38	18082	2.03545	1	0.488197	0.462685
GOTERM_BP_DIRECT	GO:0007389	pattern specification process	0.508044	0.0684894	LFNG, SMO, MFNG, FST, NOG, HEY2, HOXA2, DCHS1, GLI3, HOXA5, BMP5, GLI2	2104	58	18082	1.77809	1	0.488197	0.462685
GOTERM_BP_DIRECT	GO:0060364	frontal suture morphogenesis	0.127011	0.0691029	TGFB1, TGFB3, GLI3	2104	4	18082	6.44558	1	0.488197	0.462685
GOTERM_BP_DIRECT	GO:0006742	NADP catabolic process	0.127011	0.0691029	NCF1, NCF2, ASPDH	2104	4	18082	6.44558	1	0.488197	0.462685
GOTERM_BP_DIRECT	GO:0003273	cell migration involved in endocardial cushion formation	0.127011	0.0691029	SNAI2, DCHS1, ENG	2104	4	18082	6.44558	1	0.488197	0.462685
GOTERM_BP_DIRECT	GO:0045404	positive regulation of interleukin-4 biosynthetic process	0.127011	0.0691029	CD1D2, CD1D1, ICOSL	2104	4	18082	6.44558	1	0.488197	0.462685
GOTERM_BP_DIRECT	GO:0021615	glossopharyngeal nerve morphogenesis	0.127011	0.0691029	HOXA3, HOXD3, PLXNA4	2104	4	18082	6.44558	1	0.488197	0.462685
GOTERM_BP_DIRECT	GO:0002248	connective tissue replacement involved in inflammatory response wound healing	0.127011	0.0691029	IL1A, CLEC10A, F2R	2104	4	18082	6.44558	1	0.488197	0.462685
GOTERM_BP_DIRECT	GO:1902732	positive regulation of chondrocyte proliferation	0.127011	0.0691029	MUSTN1, SIX2, LTF	2104	4	18082	6.44558	1	0.488197	0.462685
GOTERM_BP_DIRECT	GO:0001805	positive regulation of type III hypersensitivity	0.127011	0.0691029	FCGR1, FCGR3, BTK	2104	4	18082	6.44558	1	0.488197	0.462685
GOTERM_BP_DIRECT	GO:0046813	receptor-mediated virion attachment to host cell	0.127011	0.0691029	LRRC15, GAS6, ICAM1	2104	4	18082	6.44558	1	0.488197	0.462685
GOTERM_BP_DIRECT	GO:0007600	sensory perception	0.127011	0.0691029	PNOC, MYO7A, NXNL2	2104	4	18082	6.44558	1	0.488197	0.462685
GOTERM_BP_DIRECT	GO:0071504	cellular response to heparin	0.127011	0.0691029	EGR1, SFRP1, SLIT2	2104	4	18082	6.44558	1	0.488197	0.462685
GOTERM_BP_DIRECT	GO:0006776	vitamin A metabolic process	0.127011	0.0691029	RBP2, RBP1, LRAT	2104	4	18082	6.44558	1	0.488197	0.462685
GOTERM_BP_DIRECT	GO:0003104	positive regulation of glomerular filtration	0.127011	0.0691029	GJA1, PDGFB, GAS6	2104	4	18082	6.44558	1	0.488197	0.462685
GOTERM_BP_DIRECT	GO:0035633	maintenance of blood-brain barrier	0.127011	0.0691029	BDKRB2, PTGS2, PTGS1	2104	4	18082	6.44558	1	0.488197	0.462685
GOTERM_BP_DIRECT	GO:0045578	negative regulation of B cell differentiation	0.127011	0.0691029	SFRP1, FLT3, HMGB3	2104	4	18082	6.44558	1	0.488197	0.462685
GOTERM_BP_DIRECT	GO:0007589	body fluid secretion	0.127011	0.0691029	EDN1, ANXA2, GUCA2B	2104	4	18082	6.44558	1	0.488197	0.462685
GOTERM_BP_DIRECT	GO:0002457	T cell antigen processing and presentation	0.127011	0.0691029	TREML4, RFTN1, ICAM1	2104	4	18082	6.44558	1	0.488197	0.462685
GOTERM_BP_DIRECT	GO:0090175	regulation of establishment of planar polarity	0.127011	0.0691029	SFRP1, VANGL2, SFRP2	2104	4	18082	6.44558	1	0.488197	0.462685
GOTERM_BP_DIRECT	GO:0002018	renin-angiotensin regulation of aldosterone production	0.127011	0.0691029	REN1, AGTR2, AGTR1A	2104	4	18082	6.44558	1	0.488197	0.462685
GOTERM_BP_DIRECT	GO:0061031	endodermal digestive tract morphogenesis	0.127011	0.0691029	SOX17, PITX2, FGFR2	2104	4	18082	6.44558	1	0.488197	0.462685
GOTERM_BP_DIRECT	GO:0002317	plasma cell differentiation	0.127011	0.0691029	LGALS1, ITM2A, NKX2-3	2104	4	18082	6.44558	1	0.488197	0.462685
GOTERM_BP_DIRECT	GO:0048385	regulation of retinoic acid receptor signaling pathway	0.127011	0.0691029	CYP26B1, CRABP2, AKR1C18	2104	4	18082	6.44558	1	0.488197	0.462685
GOTERM_BP_DIRECT	GO:0003357	noradrenergic neuron differentiation	0.127011	0.0691029	SOX11, PHOX2B, PHOX2A	2104	4	18082	6.44558	1	0.488197	0.462685
GOTERM_BP_DIRECT	GO:0007442	hindgut morphogenesis	0.127011	0.0691029	WNT5A, GLI3, GLI2	2104	4	18082	6.44558	1	0.488197	0.462685
GOTERM_BP_DIRECT	GO:0021938	smoothened signaling pathway involved in regulation of cerebellar granule cell precursor cell proliferation	0.127011	0.0691029	SMO, GLI1, GLI2	2104	4	18082	6.44558	1	0.488197	0.462685
GOTERM_BP_DIRECT	GO:0072137	condensed mesenchymal cell proliferation	0.127011	0.0691029	SIX2, DCHS1, FAT4	2104	4	18082	6.44558	1	0.488197	0.462685
GOTERM_BP_DIRECT	GO:0051414	response to cortisol	0.127011	0.0691029	SLIT3, IGFBP7, SLIT2	2104	4	18082	6.44558	1	0.488197	0.462685
GOTERM_BP_DIRECT	GO:0003253	cardiac neural crest cell migration involved in outflow tract morphogenesis	0.127011	0.0691029	HAND2, TWIST1, PITX2	2104	4	18082	6.44558	1	0.488197	0.462685
GOTERM_BP_DIRECT	GO:2000345	regulation of hepatocyte proliferation	0.127011	0.0691029	PLAU, GLI1, SULF2	2104	4	18082	6.44558	1	0.488197	0.462685
GOTERM_BP_DIRECT	GO:0060686	negative regulation of prostatic bud formation	0.127011	0.0691029	BMP4, WNT5A, SULF1	2104	4	18082	6.44558	1	0.488197	0.462685
GOTERM_BP_DIRECT	GO:0002374	cytokine secretion involved in immune response	0.127011	0.0691029	NOD2, TREM3, TREM1	2104	4	18082	6.44558	1	0.488197	0.462685
GOTERM_BP_DIRECT	GO:0070447	positive regulation of oligodendrocyte progenitor proliferation	0.127011	0.0691029	LYN, NOG, TRF	2104	4	18082	6.44558	1	0.488197	0.462685
GOTERM_BP_DIRECT	GO:1901491	negative regulation of lymphangiogenesis	0.127011	0.0691029	FOXC1, NGP, EPHA2	2104	4	18082	6.44558	1	0.488197	0.462685
GOTERM_BP_DIRECT	GO:0060279	positive regulation of ovulation	0.127011	0.0691029	PLAU, PLAT, INHBA	2104	4	18082	6.44558	1	0.488197	0.462685
GOTERM_BP_DIRECT	GO:1990646	cellular response to prolactin	0.127011	0.0691029	IL6, MYC, AKR1C18	2104	4	18082	6.44558	1	0.488197	0.462685
GOTERM_BP_DIRECT	GO:0048525	negative regulation of viral process	0.127011	0.0691029	APCS, LTF, MBL2	2104	4	18082	6.44558	1	0.488197	0.462685
GOTERM_BP_DIRECT	GO:0045185	maintenance of protein location	0.127011	0.0691029	LGALS3, LGALS1, LGALS9	2104	4	18082	6.44558	1	0.488197	0.462685
GOTERM_BP_DIRECT	GO:0021533	cell differentiation in hindbrain	0.127011	0.0691029	NOG, GATA2, PHOX2B	2104	4	18082	6.44558	1	0.488197	0.462685
GOTERM_BP_DIRECT	GO:0097006	regulation of plasma lipoprotein particle levels	0.127011	0.0691029	DGAT2, LIPC, APOE	2104	4	18082	6.44558	1	0.488197	0.462685
GOTERM_BP_DIRECT	GO:0038084	vascular endothelial growth factor signaling pathway	0.127011	0.0691029	NRP1, FOXC1, NRP2	2104	4	18082	6.44558	1	0.488197	0.462685
GOTERM_BP_DIRECT	GO:0060437	lung growth	0.127011	0.0691029	PDGFRB, PDGFRA, SPRY2	2104	4	18082	6.44558	1	0.488197	0.462685
GOTERM_BP_DIRECT	GO:0022008	neurogenesis	0.550381	0.0697208	PRDM8, BCL11A, PRDM6, WNT5A, CXCR4, BHLHE22, FABP7, PRDM16, TACC3, RARB, DCHS1, FAT4, EPHB1	2104	65	18082	1.71882	1	0.488635	0.4631
GOTERM_BP_DIRECT	GO:0009636	response to toxic substance	0.677392	0.0703369	PDGFRB, LYN, GRIA1, GABRB1, DNMT3A, FOS, RAD51, CPS1, CCL4, BCL2, CCL3, CDK1, SDC1, CYP1B1, NEFL, SLC22A8	2104	86	18082	1.5989	1	0.488635	0.4631
GOTERM_BP_DIRECT	GO:0003214	cardiac left ventricle morphogenesis	0.211685	0.0703485	TGFB2, SFRP2, FOXF1, HEY2, TGFBR2	2104	14	18082	3.06932	1	0.488635	0.4631
GOTERM_BP_DIRECT	GO:0035810	positive regulation of urine volume	0.211685	0.0703485	EDN1, EDNRB, NPR3, OPRL1, HAS2	2104	14	18082	3.06932	1	0.488635	0.4631
GOTERM_BP_DIRECT	GO:0045723	positive regulation of fatty acid biosynthetic process	0.211685	0.0703485	SLC45A3, APOC2, RGN, APOA1, APOA4	2104	14	18082	3.06932	1	0.488635	0.4631
GOTERM_BP_DIRECT	GO:0048513	animal organ development	0.211685	0.0703485	NPPC, HLX, NRG2, BARX1, NKX3-2	2104	14	18082	3.06932	1	0.488635	0.4631
GOTERM_BP_DIRECT	GO:0006656	phosphatidylcholine biosynthetic process	0.211685	0.0703485	FGF7, FABP5, APOA2, APOA1, AGPAT4	2104	14	18082	3.06932	1	0.488635	0.4631
GOTERM_BP_DIRECT	GO:0090026	positive regulation of monocyte chemotaxis	0.211685	0.0703485	CCR1, CXCL12, SERPINE1, CCL2, AIF1	2104	14	18082	3.06932	1	0.488635	0.4631
GOTERM_BP_DIRECT	GO:2000279	negative regulation of DNA biosynthetic process	0.211685	0.0703485	ACVRL1, GJA1, DUSP1, RGN, KCNK2	2104	14	18082	3.06932	1	0.488635	0.4631
GOTERM_BP_DIRECT	GO:0060766	negative regulation of androgen receptor signaling pathway	0.211685	0.0703485	HEYL, SFRP1, DAB2, TCF21, IGF1	2104	14	18082	3.06932	1	0.488635	0.4631
GOTERM_BP_DIRECT	GO:0060413	atrial septum morphogenesis	0.211685	0.0703485	TGFB2, SMO, GJA5, HEY2, CYR61	2104	14	18082	3.06932	1	0.488635	0.4631
GOTERM_BP_DIRECT	GO:0033160	positive regulation of protein import into nucleus, translocation	0.211685	0.0703485	IL6, CDK1, IGF1, BRCA1, TMEM173	2104	14	18082	3.06932	1	0.488635	0.4631
GOTERM_BP_DIRECT	GO:0060979	vasculogenesis involved in coronary vascular morphogenesis	0.211685	0.0703485	FGF1, ZFPM2, EPOR, FGFR2, FGFR1	2104	14	18082	3.06932	1	0.488635	0.4631
GOTERM_BP_DIRECT	GO:0042756	drinking behavior	0.211685	0.0703485	REN1, MMP17, AGTR1A, AGTR1B, APLN	2104	14	18082	3.06932	1	0.488635	0.4631
GOTERM_BP_DIRECT	GO:0045931	positive regulation of mitotic cell cycle	0.338696	0.0709063	CCNB1, TAL1, SPHK1, CDK1, BIRC5, BRCA2, CDC25B, FGF10	2104	32	18082	2.14853	1	0.491328	0.465652
GOTERM_BP_DIRECT	GO:0045071	negative regulation of viral genome replication	0.338696	0.0709063	IFITM3, BST2, FAM111A, IFITM1, TRIM6, IFITM2, TNF, LTF	2104	32	18082	2.14853	1	0.491328	0.465652
GOTERM_BP_DIRECT	GO:0001944	vasculature development	0.296359	0.0735323	BMP4, SPI1, SOX18, FLT4, WNT7B, LRP5, TCF21	2104	26	18082	2.3138	1	0.506487	0.480019
GOTERM_BP_DIRECT	GO:0001954	positive regulation of cell-matrix adhesion	0.296359	0.0735323	ITGB3, VEGFC, CDH13, EMP2, DMD, CD36, CCL21A	2104	26	18082	2.3138	1	0.506487	0.480019
GOTERM_BP_DIRECT	GO:0070207	protein homotrimerization	0.296359	0.0735323	NELL2, CUBN, SCARA5, COL23A1, LCN2, MGST1, MBL1	2104	26	18082	2.3138	1	0.506487	0.480019
GOTERM_BP_DIRECT	GO:0001782	B cell homeostasis	0.296359	0.0735323	LYN, MEF2C, TNFRSF13B, CASP3, BCL2, PIRB, GAPT	2104	26	18082	2.3138	1	0.506487	0.480019
GOTERM_BP_DIRECT	GO:0034341	response to interferon-gamma	0.296359	0.0735323	CD86, IFITM3, BST2, IFITM1, IFITM2, CITED1, SLC11A1	2104	26	18082	2.3138	1	0.506487	0.480019
GOTERM_BP_DIRECT	GO:0007157	heterophilic cell-cell adhesion via plasma membrane cell adhesion molecules	0.465707	0.074108	GRID2, CADM3, LGALS1, VCAM1, MCAM, DCHS1, ITGA5, FAT4, LGALS9, ITGAL, LGALS7	2104	52	18082	1.81798	1	0.508852	0.482261
GOTERM_BP_DIRECT	GO:0022409	positive regulation of cell-cell adhesion	0.254022	0.0741397	MEX3B, KIF26B, WNT5A, CCL2, ITGAL, TBX18	2104	20	18082	2.57823	1	0.508852	0.482261
GOTERM_BP_DIRECT	GO:0009653	anatomical structure morphogenesis	0.254022	0.0741397	PDGFRA, GSC, FSCN1, HOXA1, PITX2, FBN1	2104	20	18082	2.57823	1	0.508852	0.482261
GOTERM_BP_DIRECT	GO:0033077	T cell differentiation in thymus	0.381033	0.0764802	MAFB, BCL11B, RIPK3, BCL2, GATA3, CD3E, GLI3, ZFP36L1, MPZL2	2104	39	18082	1.98326	1	0.515069	0.488153
GOTERM_BP_DIRECT	GO:0002088	lens development in camera-type eye	0.381033	0.0764802	UNC45B, GJA1, MAF, CRYBA2, GATA3, CRYAA, CRYAB, GJE1, TGFBR2	2104	39	18082	1.98326	1	0.515069	0.488153
GOTERM_BP_DIRECT	GO:0007584	response to nutrient	0.592718	0.0769027	CUBN, VCAM1, UGT1A1, SERPINC1, IGFBP2, APOA1, NOD2, CD3E, TGFBR2, AGTR1B, SFRP2, CNR1, TBXA2R, LIPG	2104	73	18082	1.64818	1	0.515069	0.488153
GOTERM_BP_DIRECT	GO:0045906	negative regulation of vasoconstriction	0.169348	0.0770955	MMP2, ADM, NOS1, APLN	2104	9	18082	3.8196	1	0.515069	0.488153
GOTERM_BP_DIRECT	GO:0060840	artery development	0.169348	0.0770955	ACVRL1, HEY2, HOXA1, GLI3	2104	9	18082	3.8196	1	0.515069	0.488153
GOTERM_BP_DIRECT	GO:0048644	muscle organ morphogenesis	0.169348	0.0770955	TCF15, GSC, LIF, ARID5B	2104	9	18082	3.8196	1	0.515069	0.488153
GOTERM_BP_DIRECT	GO:0060947	cardiac vascular smooth muscle cell differentiation	0.169348	0.0770955	PDGFRB, VANGL2, GATA6, PDGFB	2104	9	18082	3.8196	1	0.515069	0.488153
GOTERM_BP_DIRECT	GO:0030071	regulation of mitotic metaphase/anaphase transition	0.169348	0.0770955	CENPE, UBE2C, PLK1, CDC6	2104	9	18082	3.8196	1	0.515069	0.488153
GOTERM_BP_DIRECT	GO:0060541	respiratory system development	0.169348	0.0770955	SPRY2, TCF21, PHOX2B, FGF10	2104	9	18082	3.8196	1	0.515069	0.488153
GOTERM_BP_DIRECT	GO:0030098	lymphocyte differentiation	0.169348	0.0770955	HELLS, SPI1, FLT3, IKZF1	2104	9	18082	3.8196	1	0.515069	0.488153
GOTERM_BP_DIRECT	GO:0071639	positive regulation of monocyte chemotactic protein-1 production	0.169348	0.0770955	IL1A, TRPV4, TWIST1, NOD2	2104	9	18082	3.8196	1	0.515069	0.488153
GOTERM_BP_DIRECT	GO:0001960	negative regulation of cytokine-mediated signaling pathway	0.169348	0.0770955	ECM1, PTPRC, CAV1, PALM3	2104	9	18082	3.8196	1	0.515069	0.488153
GOTERM_BP_DIRECT	GO:0034374	low-density lipoprotein particle remodeling	0.169348	0.0770955	LIPC, APOA2, APOE, MPO	2104	9	18082	3.8196	1	0.515069	0.488153
GOTERM_BP_DIRECT	GO:0031340	positive regulation of vesicle fusion	0.169348	0.0770955	ANXA1, ANXA2, PLA2G4A, DOC2B	2104	9	18082	3.8196	1	0.515069	0.488153
GOTERM_BP_DIRECT	GO:0035456	response to interferon-beta	0.169348	0.0770955	IFITM3, BST2, IFITM1, IFITM2	2104	9	18082	3.8196	1	0.515069	0.488153
GOTERM_BP_DIRECT	GO:0002606	positive regulation of dendritic cell antigen processing and presentation	0.169348	0.0770955	SLC11A1, CCR7, NOD2, CCL21A	2104	9	18082	3.8196	1	0.515069	0.488153
GOTERM_BP_DIRECT	GO:0032308	positive regulation of prostaglandin secretion	0.169348	0.0770955	P2RX7, IL1A, EDN1, P2RY2	2104	9	18082	3.8196	1	0.515069	0.488153
GOTERM_BP_DIRECT	GO:0007043	cell-cell junction assembly	0.169348	0.0770955	CDH5, CLDN5, TRPV4, FSCN1	2104	9	18082	3.8196	1	0.515069	0.488153
GOTERM_BP_DIRECT	GO:0034138	toll-like receptor 3 signaling pathway	0.169348	0.0770955	CD86, RFTN1, LGALS9, TNF	2104	9	18082	3.8196	1	0.515069	0.488153
GOTERM_BP_DIRECT	GO:0050795	regulation of behavior	0.169348	0.0770955	RELN, MDK, HTR2B, HOXA1	2104	9	18082	3.8196	1	0.515069	0.488153
GOTERM_BP_DIRECT	GO:0016043	cellular component organization	0.169348	0.0770955	FMNL3, FMNL1, INF2, DAAM2	2104	9	18082	3.8196	1	0.515069	0.488153
GOTERM_BP_DIRECT	GO:0008608	attachment of spindle microtubules to kinetochore	0.169348	0.0770955	CENPE, SGOL1, NUF2, NDC80	2104	9	18082	3.8196	1	0.515069	0.488153
GOTERM_BP_DIRECT	GO:0031536	positive regulation of exit from mitosis	0.169348	0.0770955	TGFB1, UBE2C, CDCA5, BIRC5	2104	9	18082	3.8196	1	0.515069	0.488153
GOTERM_BP_DIRECT	GO:0051092	positive regulation of NF-kappaB transcription factor activity	0.804403	0.0789044	PRKCH, TGFB1, RIPK3, SPHK1, WNT5A, ITGB2, NOD2, TRAF1, TNF, ICAM1, CRHR2, GREM1, AR, TNFSF11, NLRP3, PRKCQ, ADAM8, CARD14, LTF	2104	109	18082	1.49806	1	0.526546	0.499029
GOTERM_BP_DIRECT	GO:2001240	negative regulation of extrinsic apoptotic signaling pathway in absence of ligand	0.338696	0.0813718	CX3CR1, EYA2, BCL2, GAS1, SNAI2, TNF, FGF10, PF4	2104	33	18082	2.08342	1	0.540514	0.512268
GOTERM_BP_DIRECT	GO:0031016	pancreas development	0.338696	0.0813718	FOXF1, ALDH1A2, GATA6, PAX4, ILDR2, MSLN, NKX3-2, FGF10	2104	33	18082	2.08342	1	0.540514	0.512268
GOTERM_BP_DIRECT	GO:0043523	regulation of neuron apoptotic process	0.338696	0.0813718	GABRB2, GRM2, GRID2, EGLN3, MEF2C, NTF3, KIF14, GATA3	2104	33	18082	2.08342	1	0.540514	0.512268
GOTERM_BP_DIRECT	GO:1900026	positive regulation of substrate adhesion-dependent cell spreading	0.338696	0.0813718	DAB2, ITGB3, MYADM, FLNA, HAS2, APOA1, DOCK1, DBN1	2104	33	18082	2.08342	1	0.540514	0.512268
GOTERM_BP_DIRECT	GO:0009968	negative regulation of signal transduction	0.465707	0.082273	RGS18, RGS5, SOCS3, RGS19, UBASH3B, RGS14, KIF26A, CAV1, INPP5D, HHIP, RGS6	2104	53	18082	1.78368	1	0.545873	0.517347
GOTERM_BP_DIRECT	GO:0098779	mitophagy in response to mitochondrial depolarization	0.931414	0.0844296	FGFBP1, CALCB, CD93, DKKL1, PLOD2, TREM1, HK2, MYLK, FABP1, SFRP4, CHAF1B, P2RX5, OBSCN, BLOC1S1, FAM131B, BOC, STOM, MYH11, ASB2, KCNK3, PRKG1, ADAMTS7	2104	132	18082	1.43235	1	0.559539	0.530299
GOTERM_BP_DIRECT	GO:0050806	positive regulation of synaptic transmission	0.296359	0.0856561	GRIA1, SYDE1, NCS1, CCL2, S100B, TNF, GIP	2104	27	18082	2.2281	1	0.565076	0.535546
GOTERM_BP_DIRECT	GO:0008016	regulation of heart contraction	0.296359	0.0856561	CHRM2, GJA1, TNNT2, HRC, KCNE1L, NOS1, TBX2	2104	27	18082	2.2281	1	0.565076	0.535546
GOTERM_BP_DIRECT	GO:0014003	oligodendrocyte development	0.296359	0.0856561	LYN, PRDM8, TGFB1, MYRF, LPAR1, CD9, SOX11	2104	27	18082	2.2281	1	0.565076	0.535546
GOTERM_BP_DIRECT	GO:0030099	myeloid cell differentiation	0.296359	0.0856561	CCR1, CDKN1C, DAB2, TAL1, CLEC5A, MYB, HOXB7	2104	27	18082	2.2281	1	0.565076	0.535546
GOTERM_BP_DIRECT	GO:0043507	positive regulation of JUN kinase activity	0.381033	0.086318	EPHA4, ZEB2, EDN1, VANGL2, FZD4, WNT5A, TLR6, TNF, SASH1	2104	40	18082	1.93367	1	0.568793	0.539069
GOTERM_BP_DIRECT	GO:0051044	positive regulation of membrane protein ectodomain proteolysis	0.211685	0.0874327	ADAM8, APOE, TNFRSF1B, TNF, RGMA	2104	15	18082	2.8647	1	0.570286	0.540484
GOTERM_BP_DIRECT	GO:0001935	endothelial cell proliferation	0.211685	0.0874327	SCARB1, MMP14, APOA1, TEK, CD34	2104	15	18082	2.8647	1	0.570286	0.540484
GOTERM_BP_DIRECT	GO:0010812	negative regulation of cell-substrate adhesion	0.211685	0.0874327	COL1A1, ANGPT2, LGALS1, FZD4, PLG	2104	15	18082	2.8647	1	0.570286	0.540484
GOTERM_BP_DIRECT	GO:0045019	negative regulation of nitric oxide biosynthetic process	0.211685	0.0874327	PTGIS, CAV1, RGN, CD34, EPOR	2104	15	18082	2.8647	1	0.570286	0.540484
GOTERM_BP_DIRECT	GO:0050710	negative regulation of cytokine secretion	0.211685	0.0874327	SRGN, IL6, RGCC, FFAR4, LRRC32	2104	15	18082	2.8647	1	0.570286	0.540484
GOTERM_BP_DIRECT	GO:0001759	organ induction	0.211685	0.0874327	BMP4, SPRY1, FGF1, FGF10, FGFR1	2104	15	18082	2.8647	1	0.570286	0.540484
GOTERM_BP_DIRECT	GO:0033630	positive regulation of cell adhesion mediated by integrin	0.211685	0.0874327	FOXC2, ZAP70, TGFB2, ITGB3, CCL21A	2104	15	18082	2.8647	1	0.570286	0.540484
GOTERM_BP_DIRECT	GO:0006956	complement activation	0.211685	0.0874327	C1RB, C1RA, RGCC, MASP1, CFB	2104	15	18082	2.8647	1	0.570286	0.540484
GOTERM_BP_DIRECT	GO:0007588	excretion	0.211685	0.0874327	AMN, DAB2, KIRREL, GUCA2B, ATP6V0A4	2104	15	18082	2.8647	1	0.570286	0.540484
GOTERM_BP_DIRECT	GO:0045648	positive regulation of erythrocyte differentiation	0.254022	0.0883901	TAL1, INPP5D, HMGB2, INHBA, GATA2, ETS1	2104	21	18082	2.45546	1	0.574585	0.544558
GOTERM_BP_DIRECT	GO:2000251	positive regulation of actin cytoskeleton reorganization	0.254022	0.0883901	HCK, BAIAP2L2, FES, NTF3, TEK, RAPGEF3	2104	21	18082	2.45546	1	0.574585	0.544558
GOTERM_BP_DIRECT	GO:0010165	response to X-ray	0.254022	0.0883901	BLM, RAD51, ANXA1, PMAIP1, LRP2, BRCA2	2104	21	18082	2.45546	1	0.574585	0.544558
GOTERM_BP_DIRECT	GO:0006915	apoptotic process	3.30229	0.0895319	STEAP3, CITED1, NCF1, BUB1B, HIF3A, LSP1, TNF, IFIT2, GJA1, CASP7, CASP12, LGALS1, EVA1A, ADAMTSL4, PEG10, CASP3, PGLYRP1, PHLDA1, RNF152, LGALS7, SRGN, SPINK2, MEF2C, SEMA6A, CKAP2, DIO3, UNC5C, TRAF1, TMEM173, TGFBR2, GREM1, SFRP2, MELK, TRAF4, NAIP6, BTK, BIRC5, CRYAA, DOCK1, CARD14, S100A9, S100A8, EPHA2, KANK2, SEMA3A, C5AR1, CDCA7, ECSCR, SLC5A11, ZFP36L1, BCL2L12, INPP5D, BNIP2, PMAIP1, BM…	2104	570	18082	1.17604	1	0.581354	0.550973
GOTERM_BP_DIRECT	GO:0006869	lipid transport	0.804403	0.0904834	SCARB1, APOL11B, ABCA8A, ABCA6, APOC4, ABCA9, APOA2, APOC3, APOA1, APOA4, ATP10A, GULP1, APOM, APOC2, TNFAIP8L3, APOE, PLTP, GPIHBP1, MFSD2A	2104	111	18082	1.47106	1	0.586873	0.556204
GOTERM_BP_DIRECT	GO:0008630	intrinsic apoptotic signaling pathway in response to DNA damage	0.465707	0.0909664	MYC, BCL2, PMAIP1, BRCA1, TNFRSF1B, BRCA2, TNF, HIC1, IER3, EPHA2, NFATC4	2104	54	18082	1.75065	1	0.589344	0.558546
GOTERM_BP_DIRECT	GO:0048863	stem cell differentiation	0.338696	0.0926776	TCF7L1, SOX17, OSR1, KIT, LIF, MSX1, HOXA7, SOX21	2104	34	18082	2.02214	1	0.598417	0.567145
GOTERM_BP_DIRECT	GO:0010332	response to gamma radiation	0.338696	0.0926776	PTPRC, CCL7, MYC, BCL2, CCL2, GATA3, BRCA2, CXCL2	2104	34	18082	2.02214	1	0.598417	0.567145
GOTERM_BP_DIRECT	GO:0019228	neuronal action potential	0.338696	0.0926776	GRIA1, P2RX5, P2RX2, KCNA1, GPR88, SCN7A, KCNMB4, SCN5A	2104	34	18082	2.02214	1	0.598417	0.567145
GOTERM_BP_DIRECT	GO:0007140	male meiosis	0.296359	0.0988072	KIF18A, CYP26B1, TEX40, TDRD9, FANCA, RSPO1, CHTF18	2104	28	18082	2.14853	1	0.624467	0.591833
GOTERM_BP_DIRECT	GO:0043113	receptor clustering	0.296359	0.0988072	DOK7, ITGB2, FLNA, MADCAM1, ITGB7, AGRN, ITGAL	2104	28	18082	2.14853	1	0.624467	0.591833
GOTERM_BP_DIRECT	GO:0050770	regulation of axonogenesis	0.296359	0.0988072	EPHA4, SLIT1, SLIT3, VIM, LRRC4C, EPHB2, EPHB3	2104	28	18082	2.14853	1	0.624467	0.591833
GOTERM_BP_DIRECT	GO:0006024	glycosaminoglycan biosynthetic process	0.296359	0.0988072	PDGFRB, SDC2, GPC3, SDC1, GPC2, AGRN, HSPG2	2104	28	18082	2.14853	1	0.624467	0.591833
GOTERM_BP_DIRECT	GO:0007205	protein kinase C-activating G-protein coupled receptor signaling pathway	0.296359	0.0988072	EDNRA, EDN1, LRP1, F2R, HTR2B, DGKI, CRHR2	2104	28	18082	2.14853	1	0.624467	0.591833
GOTERM_BP_DIRECT	GO:0045665	negative regulation of neuron differentiation	0.592718	0.0988358	NOTCH3, JAG1, CAV1, IRX3, SOX21, GLI3, PHOX2B, CIT, ASPM, REST, ISL2, MAG, ID4, HOXA2	2104	76	18082	1.58312	1	0.624467	0.591833

## Sheet: UP_BP_T1D_vs_Healthy
#Upregulated GO enrichemnt in T1D vs Healthy Adult Group
#Biological Process
Category	ID	Term	%	PValue	Genes	List Total	Pop Hits	Pop Total	Fold Enrichment	Bonferroni	Benjamini	FDR
GOTERM_BP_DIRECT	GO:0002376	immune system process	17.0868	1.78002e-83	CD86, NRROS, CLEC4N, LST1, H2-K1, IFIT1, IFI30, IFIT3, IFIT2, LGALS3, CLEC5A, C1RL, DHX58, LGALS9, PGLYRP1, B2M, HERC6, ZBP1, GBP5, TICAM2, RSAD2, CD300A, SP110, CD180, TAP2, TAP1, FCGR1, NAIP6, BTK, CD300E, SERPING1, SH2D1B1, IDO2, CLEC4E, CFB, H2-D1, IDO1, C4BP, CSF1R, IL4RA, TAPBPL, CFP, MEFV, LY9, CD79B, C3, INPP5D, BTLA, SLAMF7, SLAMF6, CD300LD, CD300LF, GSDMD, LYN, H2-EB1, TNFSF13, LY86, IR…	628	383	18082	9.17166	4.81317e-80	4.81317e-80	4.55329e-80
GOTERM_BP_DIRECT	GO:0045087	innate immune response	12.1849	6.05114e-44	NRROS, CLEC4N, PIK3CD, IFIT1, IFIT3, IFIT2, IFIH1, C4B, LGALS3, CLEC5A, C1RL, CASP4, DHX58, TNFAIP8L2, PGLYRP1, TRIM21, B2M, HAVCR2, OASL2, HERC6, FGB, ZBP1, FCER1G, ANXA1, TICAM2, RSAD2, SYK, DDX58, SP110, CD180, CYBB, CYBA, TMEM173, TLR1, FCGR1, FGR, HCK, TYROBP, NAIP6, OAS2, IRF1, TLR12, BTK, IRF7, SERPING1, TLR8, IRF5, TLR7, TLR6, SH2D1B1, TLR5, CLEC4E, TLR3, CFB, TLR13, TLR2, C1QB, C4BP, CSF…	628	400	18082	6.26248	1.63623e-40	8.18113e-41	7.7394e-41
GOTERM_BP_DIRECT	GO:0006954	inflammatory response	11.2045	1.3611e-42	CXCL9, CD40, CIITA, NRROS, NCF1, PIK3CD, TNFAIP3, CXCL1, CXCL13, C4B, MMP25, CCRL2, STAB1, CASP4, C3AR1, CCR7, CCR5, HAVCR2, GBP5, ANXA1, TICAM2, SLC11A1, CD180, CYBB, CYBA, TNFRSF1B, TLR1, IL1A, HCK, NAIP6, IL1B, TLR12, CHST1, TLR8, TLR7, TLR6, TLR5, TLR3, TLR13, TLR2, IDO1, CSF1R, CCL12, NLRP1A, PTAFR, C5AR1, FPR2, NOD2, PTGS2, MEFV, PLA2G7, AIF1, PTGS1, C3, CCL9, CCL8, CCL7, CCL6, CCL5, CCL4, …	628	344	18082	6.69605	3.6804e-39	1.2268e-39	1.16056e-39
GOTERM_BP_DIRECT	GO:0006955	immune response	8.96359	2.85909e-34	CXCL9, NRROS, LST1, H2-K1, CXCL1, CXCL13, CTSS, TNFSF13B, TNFSF10, BLNK, CCR7, H2-OA, CCR6, CCR5, B2M, OASL2, TGTP2, TGTP1, TNFRSF1B, VAV1, TLR1, IL1A, OAS2, IL1B, TLR12, IRF8, LCP2, TLR7, TLR6, CLEC4E, H2-D1, TLR2, CD274, CCL12, H2-DMA, H2-Q2, H2-Q1, FYB, OAS1G, H2-DMB2, CCL9, CCL8, CCL7, CCL6, HRH2, H2-DMB1, CCL5, CCL4, CCL3, CCL2, CCR1, CD74, CCL24, H2-EB1, TNFSF13, H2-AA, CXCL10, MARCH1, CD4,…	628	272	18082	6.77482	7.73098e-31	1.93274e-31	1.82839e-31
GOTERM_BP_DIRECT	GO:0035458	cellular response to interferon-beta	3.78151	2.52248e-28	IFIT1, IFIT3, GM12185, TRIM6, GM4841, GBP2, GM5431, GBP3, GBP6, TGTP2, GBP2B, TGTP1, IFI204, IFI205, STAT1, IFI203, IRGM2, IRGM1, IFI47, TMEM173, IFI202B, IIGP1, F830016B08RIK, IRF1, IGTP, GM4951, TLR3	628	41	18082	18.9612	6.82078e-25	1.36416e-25	1.2905e-25
GOTERM_BP_DIRECT	GO:0006935	chemotaxis	5.32213	1.32718e-25	CX3CR1, CCL12, CXCL9, PTAFR, C5AR1, PIK3CD, CXCR4, FPR2, LSP1, CXCL13, CXCL16, CCL9, CCL8, CCL7, CCL6, CCL5, CCL4, CCRL2, CCL3, RAC2, C3AR1, CCL2, CCR7, NCKAP1L, LGALS9, CCR6, CCR5, CMKLR1, LYN, CMTM7, CCR1, CCL24, CMTM3, IL16, CXCL10, FES, DOCK2, PF4	628	118	18082	9.27232	3.58869e-22	5.98116e-23	5.65821e-23
GOTERM_BP_DIRECT	GO:0071346	cellular response to interferon-gamma	3.92157	3.74082e-22	CCL12, CIITA, H2-Q7, AIF1, CCL9, CCL8, CCL7, CCL6, CCL5, CCL4, MRC1, CCL3, CCL2, IL12B, GBP2, IL12RB1, GBP4, GBP3, GBP6, GBP5, CCL24, GBP2B, GBP8, GBP7, NOS2, GBP10, TLR3, H2-AB1	628	68	18082	11.8559	1.01152e-18	1.44502e-19	1.367e-19
GOTERM_BP_DIRECT	GO:0042832	defense response to protozoan	2.66106	2.37289e-19	GBP6, BATF2, GBP2B, CD40, GBP7, SLC11A1, IRGM2, IL4RA, TSPAN32, IIGP1, BATF, GBP10, BCL3, TLR12, IL12B, IRF8, CD37, GBP2, GBP3	628	30	18082	18.2356	6.41629e-16	8.02036e-17	7.58731e-17
GOTERM_BP_DIRECT	GO:0051607	defense response to virus	5.04202	4.90192e-18	CD86, CXCL9, CD40, UNC93B1, NLRC5, OAS1A, DDX60, IFIT1, SAMHD1, IFIT3, IFIT2, OAS1G, IFIH1, DHX58, ITGAX, IL12B, PMAIP1, OASL2, ZBP1, GBP2B, TICAM2, RSAD2, DDX58, STAT2, ISG15, TMEM173, BST2, CXCL10, PTPRC, OAS2, IRF1, TLR8, IRF5, TLR7, TLR3, TRIM34A	628	167	18082	6.20687	1.32548e-14	1.47276e-15	1.39324e-15
GOTERM_BP_DIRECT	GO:0030593	neutrophil chemotaxis	3.36134	4.45626e-17	CCL24, CCL12, FCER1G, ITGAM, CSF3R, SYK, C5AR1, ITGB2, CXCL1, VAV1, LGALS3, FCGR3, CCL9, CCL8, CCL7, CCL6, IL1B, CCL5, CCL4, SPP1, CCL3, CCL2, NCKAP1L, AMICA1	628	69	18082	10.015	1.20497e-13	1.20497e-14	1.13991e-14
GOTERM_BP_DIRECT	GO:0002250	adaptive immune response	4.20168	4.59255e-15	CD86, H2-T23, CLEC4A2, CLEC4N, UNC93B1, PIK3CD, PIRB, LY9, CTSS, CD79B, BTLA, SLAMF7, SLAMF6, HAVCR2, LYN, FGB, CD74, ANXA1, SYK, ERAP1, TAP2, TAP1, ICOSL, SERPINA3G, LAT2, CD4, BTK, SH2D1B1, CD244, MYO1G	628	139	18082	6.21432	1.23084e-11	1.12893e-12	1.06798e-12
GOTERM_BP_DIRECT	GO:0034341	response to interferon-gamma	2.10084	2.0689e-14	CD86, TGTP2, CIITA, H2-EB1, TGTP1, SLC11A1, IRGM2, MEFV, H2-AA, CXCL16, BST2, KYNU, UBD, CCL5, TRIM21	628	26	18082	16.6113	5.5838e-11	4.5767e-12	4.32959e-12
GOTERM_BP_DIRECT	GO:0042102	positive regulation of T cell proliferation	2.94118	2.20034e-14	CD86, SASH3, CD274, ANXA1, VCAM1, CD80, PDCD1LG2, ITGAL, AIF1, CORO1A, TNFSF13B, SPN, CD4, PTPRC, IL1B, CCL5, IL12B, CCR7, NCKAP1L, CARD11, HAVCR2	628	64	18082	9.4477	5.94405e-11	4.5767e-12	4.32959e-12
GOTERM_BP_DIRECT	GO:0019886	antigen processing and presentation of exogenous peptide antigen via MHC class II	1.68067	2.64736e-14	CD74, H2-DMB2, H2-EB1, FCER1G, UNC93B1, H2-DMA, H2-DMB1, H2-OA, FCGR2B, IFI30, H2-AA, H2-AB1	628	14	18082	24.6797	7.14486e-11	5.11318e-12	4.8371e-12
GOTERM_BP_DIRECT	GO:0009615	response to virus	3.22129	6.59228e-14	TGTP2, BATF3, TGTP1, RSAD2, DDX58, OAS1A, DDX60, IFIT1, KLRA8, IFIT3, IFIT2, IFIH1, BST2, CXCL10, OAS2, CCL5, BCL3, DHX58, TLR8, IFI27L2A, TLR3, TLR13, OASL2	628	84	18082	7.8838	1.78321e-10	1.14728e-11	1.08534e-11
GOTERM_BP_DIRECT	GO:0050830	defense response to Gram-positive bacterium	3.36134	6.78865e-14	GSDMD, GBP6, H2-T23, GBP2B, GBP7, NCF1, LYZ2, C5AR1, NOD2, IL27RA, P2RX7, FGR, HCK, GBP10, HIST1H2BF, ACP5, TNFRSF14, GBP2, PGLYRP1, B2M, MYO1F, HAVCR2, TLR2, GBP3	628	93	18082	7.43045	1.83425e-10	1.14728e-11	1.08534e-11
GOTERM_BP_DIRECT	GO:0019882	antigen processing and presentation	2.66106	1.24844e-13	CD74, H2-EB1, UNC93B1, H2-DMA, H2-K1, H2-Q2, H2-AA, H2-Q1, CTSS, PSMB8, PSMB9, RAB32, H2-DMB2, FCGRT, H2-DMB1, GM11127, H2-OA, H2-D1, H2-AB1	628	54	18082	10.1309	3.3743e-10	1.98576e-11	1.87854e-11
GOTERM_BP_DIRECT	GO:0032496	response to lipopolysaccharide	4.48179	1.61533e-12	CXCL9, CD40, NCF2, PTAFR, C5AR1, CXCL1, PTPN22, NOD2, PTGS2, CXCL13, LITAF, TRIM6, CASP1, PLCG2, ACP5, TNFRSF14, CCR7, LGALS9, VCAM1, NOS2, STAT1, IL10RA, SLC11A1, TNFRSF1B, NFKB2, P2RX7, CXCL10, IL1B, FAS, TLR2, PF4, IDO1	628	197	18082	4.67703	4.36797e-09	2.42658e-10	2.29556e-10
GOTERM_BP_DIRECT	GO:0006952	defense response	3.36134	9.74663e-12	CD74, TGTP2, CD83, TGFB1, TGTP1, IRGM2, IRGM1, TAP1, IFI47, NOD2, LSP1, GM12185, TAPBP, TLR1, F830016B08RIK, IGTP, GM4951, GM4841, CCR5, FCGR2B, GM5431, TLR3, H2-D1, IDO1	628	116	18082	5.95717	2.63549e-08	1.3871e-09	1.3122e-09
GOTERM_BP_DIRECT	GO:0070374	positive regulation of ERK1 and ERK2 cascade	4.20168	1.41298e-11	CSF1R, CCL12, C5AR1, PDGFB, PTPN22, NOD2, ICAM1, C3, CCL9, CCL8, CCL7, GPNMB, GLIPR2, CCL6, CCL5, CCL4, CCL3, CCL2, HAVCR2, CCR1, FGB, CD74, CCL24, TGFB1, SCIMP, IL1A, BMP2, IL1B, CD44, TLR2	628	188	18082	4.59463	3.8207e-08	1.91036e-09	1.80721e-09
GOTERM_BP_DIRECT	GO:0070098	chemokine-mediated signaling pathway	2.38095	3.05978e-11	CCR1, CCL24, CCL12, CXCL9, GPR35, CXCL1, CXCL13, CXCL10, CCL9, CCL8, CCL7, CCL6, CCL5, CCL4, CCL3, CCL2, PF4	628	55	18082	8.89965	8.27363e-08	3.93983e-09	3.7271e-09
GOTERM_BP_DIRECT	GO:0050729	positive regulation of inflammatory response	2.38095	2.9115e-10	CCL24, CCL12, PLA2G4A, CTSS, CCL9, CCL8, CCL7, CCL6, CCL5, CCL4, CCL3, CCL2, CCR5, TLR3, GPSM3, TLR2, TGM2	628	63	18082	7.76954	7.8727e-07	3.5785e-08	3.38528e-08
GOTERM_BP_DIRECT	GO:0032760	positive regulation of tumor necrosis factor production	2.2409	1.03493e-09	SASH3, H2-T23, FCER1G, PTAFR, CYBA, NOD2, CCL4, CCL3, IL12B, CCL2, CCR7, LGALS9, CCR5, TLR3, PF4, TLR2	628	59	18082	7.80827	2.79844e-06	1.21671e-07	1.15102e-07
GOTERM_BP_DIRECT	GO:0002224	toll-like receptor signaling pathway	1.40056	1.29805e-09	TLR1, CD86, UNC93B1, CD180, TLR8, TLR7, TLR6, TLR5, TLR3, TLR2	628	17	18082	16.9371	3.50993e-06	1.46247e-07	1.38351e-07
GOTERM_BP_DIRECT	GO:0071222	cellular response to lipopolysaccharide	3.92157	4.0936e-09	CD86, CX3CR1, CD40, CD80, TNFAIP3, LITAF, ICAM1, CXCL16, MRC1, CCL2, IL12B, GBP2, B2M, HAVCR2, GBP6, TICAM2, NOS2, STAT1, CD180, NR1H3, TNFRSF1B, CXCL10, GBP10, FCGR4, AXL, TNIP3, IRF8, TLR5	628	209	18082	3.85743	1.1069e-05	4.42764e-07	4.18857e-07
GOTERM_BP_DIRECT	GO:0050776	regulation of immune response	1.68067	5.30788e-09	SPN, FCGR1, CD40, FCGR3, FCER1G, SYK, CLEC12A, IRF1, TNFSF13, PHF11A, CARD11, TNFSF13B	628	32	18082	10.7974	1.43524e-05	5.52019e-07	5.22213e-07
GOTERM_BP_DIRECT	GO:0050766	positive regulation of phagocytosis	1.96078	5.8457e-09	SIRPB1A, FCER1G, SLC11A1, CYBA, NOD2, MERTK, C3, FCGR1, FCGR3, IL1B, CCR7, DOCK2, FCGR2B, MFGE8	628	48	18082	8.39796	1.58066e-05	5.85436e-07	5.53826e-07
GOTERM_BP_DIRECT	GO:0060326	cell chemotaxis	2.38095	8.42907e-09	CCL12, CXCL9, VCAM1, SAA3, PDGFB, CXCL1, FPR2, CXCL13, CXCL10, CCL9, CCL8, BIN2, CCL6, CCL4, CCL3, CCL2, CCR6	628	78	18082	6.2754	2.27919e-05	8.14007e-07	7.70056e-07
GOTERM_BP_DIRECT	GO:0042742	defense response to bacterium	3.64146	1.17711e-08	NLRP1A, NCF1, LYZ2, H2-M3, H2-K1, NOD2, CXCL13, SPN, STAB1, SLAMF8, TNFRSF14, PGLYRP1, FCER1G, NOS2, SYK, SLC11A1, IRGM2, ISG15, TLR1, FCGR1, NAIP6, BCL3, IRF8, TLR6, TLR5, CLEC4E	628	191	18082	3.91947	3.18286e-05	1.09755e-06	1.03829e-06
GOTERM_BP_DIRECT	GO:0006909	phagocytosis	1.96078	1.69352e-08	ANXA1, SLC11A1, ITGB2, PLD4, MYO7A, MERTK, ITGAL, CORO1A, VAV1, HCK, AXL, IRF8, CD302, MYO1G	628	52	18082	7.75196	4.57918e-05	1.52643e-06	1.44401e-06
GOTERM_BP_DIRECT	GO:0002474	antigen processing and presentation of peptide antigen via MHC class I	1.68067	2.17805e-08	H2-T23, H2-T22, H2-Q6, H2-M2, H2-Q7, H2-K1, H2-M3, H2-Q2, B2M, H2-Q1, H2-D1, H2-Q10	628	36	18082	9.59766	5.88928e-05	1.89983e-06	1.79725e-06
GOTERM_BP_DIRECT	GO:0071407	cellular response to organic cyclic compound	2.2409	3.53773e-08	MSR1, P2RY13, CCL12, TGFB1, RGS19, NOS2, STAT1, CYBA, NOD2, TMEM173, P2RX7, BMP2, SOCS1, IL1B, CCL5, CCL3	628	75	18082	6.14251	9.56556e-05	2.98938e-06	2.82797e-06
GOTERM_BP_DIRECT	GO:0007159	leukocyte cell-cell adhesion	1.40056	5.6133e-08	PTPRC, ITGAM, VCAM1, SYK, CCL5, ITGB2, MSN, ITGAL, FERMT3, ICAM1	628	24	18082	11.9971	0.000151772	4.5995e-06	4.35116e-06
GOTERM_BP_DIRECT	GO:0001774	microglial cell activation	1.2605	6.43243e-08	TLR1, CX3CR1, CASP1, TLR8, TLR7, TLR6, AIF1, TLR3, TLR2	628	18	18082	14.3965	0.000173918	5.11567e-06	4.83946e-06
GOTERM_BP_DIRECT	GO:0002548	monocyte chemotaxis	1.68067	7.38612e-08	LGALS3, CCL24, CCL9, CCL12, CCL8, ANXA1, CCL7, CCL6, CCL4, CCL3, PDGFB, CCL2	628	40	18082	8.6379	0.000199701	5.5478e-06	5.24825e-06
GOTERM_BP_DIRECT	GO:0042130	negative regulation of T cell proliferation	1.68067	7.38612e-08	SPN, CD274, PLA2G2D, TGFB1, GPNMB, H2-M3, BTLA, PDCD1LG2, H2-AA, H2-AB1, HAVCR2, IDO1	628	40	18082	8.6379	0.000199701	5.5478e-06	5.24825e-06
GOTERM_BP_DIRECT	GO:0048247	lymphocyte chemotaxis	1.54062	1.05256e-07	CCL24, CCL9, CCL12, CCL8, CCL7, CCL6, CCL5, CCL4, CCL3, CCL2, CXCL16	628	33	18082	9.59766	0.000284571	7.6662e-06	7.25228e-06
GOTERM_BP_DIRECT	GO:0001916	positive regulation of T cell mediated cytotoxicity	1.2605	1.07735e-07	P2RX7, H2-T23, PTPRC, H2-K1, H2-M3, TAP2, IL12B, B2M, H2-D1	628	19	18082	13.6388	0.000291273	7.6662e-06	7.25228e-06
GOTERM_BP_DIRECT	GO:0032755	positive regulation of interleukin-6 production	1.82073	1.57642e-07	FCER1G, TICAM2, DDX58, CYBA, NOD2, P2RX7, IL1A, ADORA2B, IL1B, TLR7, CCR5, TLR3, TLR2	628	52	18082	7.19825	0.000426172	1.06566e-05	1.00812e-05
GOTERM_BP_DIRECT	GO:0032729	positive regulation of interferon-gamma production	1.82073	1.57642e-07	SASH3, TICAM2, SLC11A1, H2-M3, IL27RA, IL1B, BCL3, IL12B, IRF8, SLAMF6, IL12RB1, IL18R1, HAVCR2	628	52	18082	7.19825	0.000426172	1.06566e-05	1.00812e-05
GOTERM_BP_DIRECT	GO:0032481	positive regulation of type I interferon production	1.12045	2.94372e-07	SYK, IRF1, DHX58, PLCG2, IRF7, PTPN22, TMEM173, TLR3	628	15	18082	15.3563	0.000795666	1.94142e-05	1.8366e-05
GOTERM_BP_DIRECT	GO:0071260	cellular response to mechanical stimulus	2.10084	4.14816e-07	CD40, TGFB1, CYBA, PTGS2, CNN2, MAG, IRF1, IL1B, CASP4, CASP1, FAS, TLR8, TLR7, TLR5, TLR3	628	78	18082	5.53711	0.00112103	2.49727e-05	2.36243e-05
GOTERM_BP_DIRECT	GO:0050718	positive regulation of interleukin-1 beta secretion	1.2605	4.15596e-07	P2RX7, GSDMD, NLRP1A, CASP4, CASP1, CCL3, CCR7, NOD2, CCR5	628	22	18082	11.779	0.00112314	2.49727e-05	2.36243e-05
GOTERM_BP_DIRECT	GO:0043011	myeloid dendritic cell differentiation	1.2605	4.15596e-07	CD86, BATF2, BATF3, SPI1, TGFB1, UBD, PIRB, BATF, TGFBR2	628	22	18082	11.779	0.00112314	2.49727e-05	2.36243e-05
GOTERM_BP_DIRECT	GO:0016064	immunoglobulin mediated immune response	1.2605	4.15596e-07	C4B, CD74, FCER1G, H2-DMA, INPP5D, TNFSF13, IRF7, IL4RA, FCGR2B	628	22	18082	11.779	0.00112314	2.49727e-05	2.36243e-05
GOTERM_BP_DIRECT	GO:0002479	antigen processing and presentation of exogenous peptide antigen via MHC class I, TAP-dependent	1.40056	5.09668e-07	H2-T23, H2-Q7, H2-K1, B2M, PSMB8, PSMB10, H2-D1, H2-Q10, PSMB9, TAPBP	628	30	18082	9.59766	0.00137719	2.99596e-05	2.8342e-05
GOTERM_BP_DIRECT	GO:0030335	positive regulation of cell migration	3.36134	6.36103e-07	CCR1, LYN, CSF1R, CD274, CCL24, TGFB1, MMP2, PDGFB, PIK3CD, CXCR4, AIF1, CORO1A, CXCL16, FGR, CXCL10, MMP14, BMP2, GPNMB, CCL5, C3AR1, CCL3, CTSH, MYO1F, FERMT3	628	203	18082	3.4041	0.00171854	3.65962e-05	3.46202e-05
GOTERM_BP_DIRECT	GO:0034097	response to cytokine	2.10084	6.71301e-07	CD274, STAT1, SERPINA3M, SERPINA3N, SERPINA3G, PTGS2, CORO1A, SERPINA3I, NFKB2, CXCL16, SERPINA3F, IFI27, CCL5, ACP5, TIMP1	628	81	18082	5.33204	0.00181355	3.72986e-05	3.52847e-05
GOTERM_BP_DIRECT	GO:0050707	regulation of cytokine secretion	0.980392	6.75899e-07	LYN, TLR1, SOCS1, TLR8, TLR6, TLR5, TLR2	628	11	18082	18.3228	0.00182596	3.72986e-05	3.52847e-05
GOTERM_BP_DIRECT	GO:0010575	positive regulation of vascular endothelial growth factor production	1.2605	8.9885e-07	C3, IL1A, ADORA2B, IL1B, C5AR1, C3AR1, HPSE, PTGS2, SULF2	628	24	18082	10.7974	0.00242754	4.86098e-05	4.59851e-05
GOTERM_BP_DIRECT	GO:0045088	regulation of innate immune response	0.980392	1.31211e-06	FGR, IRF1, DHX58, IRF7, TNFAIP3, SAMHD1, MYO1F	628	12	18082	16.7959	0.00354166	6.95675e-05	6.58113e-05
GOTERM_BP_DIRECT	GO:0032735	positive regulation of interleukin-12 production	1.2605	1.79551e-06	CD40, H2-M3, IL12B, IRF8, CCR7, NOD2, TLR3, TLR2, IDO1	628	26	18082	9.96681	0.00484329	9.33665e-05	8.83252e-05
GOTERM_BP_DIRECT	GO:0009617	response to bacterium	1.40056	2.1536e-06	FCGR1, P2RX7, NCF1, SP110, STAT1, SLC11A1, CASP1, IRF8, FCGR2B, TLR2	628	35	18082	8.22657	0.00580642	0.000109874	0.000103942
GOTERM_BP_DIRECT	GO:0045576	mast cell activation	0.980392	2.36527e-06	FCGR3, FCER1G, RHOH, LCP2, CD48, FCGR2B, FYB	628	13	18082	15.5039	0.0063753	0.000118439	0.000112044
GOTERM_BP_DIRECT	GO:0090023	positive regulation of neutrophil chemotaxis	1.2605	3.35935e-06	CD74, SELL, IL1B, C5AR1, RAC2, C3AR1, CCR7, CXCL1, NCKAP1L	628	28	18082	9.25489	0.00904256	0.000165158	0.00015624
GOTERM_BP_DIRECT	GO:0071347	cellular response to interleukin-1	1.96078	3.44689e-06	FGB, CCL24, CCL12, SAA3, ICAM1, CCL9, CCL8, CCL7, CCL6, IRF1, CCL5, CCL4, CCL3, CCL2	628	80	18082	5.03877	0.00927712	0.000166436	0.000157449
GOTERM_BP_DIRECT	GO:0044406	adhesion of symbiont to host	0.840336	5.53726e-06	GBP6, GBP2B, GBP7, GBP2, ICAM1, GBP3	628	9	18082	19.1953	0.0148613	0.000258151	0.000244212
GOTERM_BP_DIRECT	GO:0034138	toll-like receptor 3 signaling pathway	0.840336	5.53726e-06	CD86, UNC93B1, RFTN1, LGALS9, TLR3, HAVCR2	628	9	18082	19.1953	0.0148613	0.000258151	0.000244212
GOTERM_BP_DIRECT	GO:0045089	positive regulation of innate immune response	1.12045	6.30981e-06	CD74, GBP5, MMP2, TLR8, NOD2, SH2D1B1, LGALS9, HAVCR2	628	22	18082	10.4702	0.016917	0.000289182	0.000273568
GOTERM_BP_DIRECT	GO:0042590	antigen processing and presentation of exogenous peptide antigen via MHC class I	0.70028	6.96455e-06	FCGR1, FCGR3, FCER1G, H2-K1, IFI30	628	5	18082	28.793	0.018656	0.000308724	0.000292055
GOTERM_BP_DIRECT	GO:0019885	antigen processing and presentation of endogenous peptide antigen via MHC class I	0.70028	6.96455e-06	ERAP1, TAP2, TAP1, B2M, TAPBP	628	5	18082	28.793	0.018656	0.000308724	0.000292055
GOTERM_BP_DIRECT	GO:0031663	lipopolysaccharide-mediated signaling pathway	1.2605	7.77677e-06	LYN, CCL12, TGFB1, STAT1, IL1B, CCL5, CCL3, CCL2, PTPN22	628	31	18082	8.35926	0.0208089	0.000339168	0.000320855
GOTERM_BP_DIRECT	GO:0050731	positive regulation of peptidyl-tyrosine phosphorylation	2.10084	9.9824e-06	LYN, CD74, TGFB1, SYK, CAV2, CD80, LRRK1, PDGFB, NOD2, ICAM1, CD4, HCLS1, TNFRSF14, SH2D1B1, CD44	628	101	18082	4.27619	0.0266315	0.000426542	0.000403511
GOTERM_BP_DIRECT	GO:0002755	MyD88-dependent toll-like receptor signaling pathway	0.980392	1.00957e-05	TLR1, TLR8, TLR7, TLR6, TLR5, TLR13, TLR2	628	16	18082	12.5969	0.0269296	0.000426542	0.000403511
GOTERM_BP_DIRECT	GO:0048245	eosinophil chemotaxis	0.840336	1.0758e-05	LGALS3, CCL24, CCL7, CCL5, CCL3, CCL2	628	10	18082	17.2758	0.0286708	0.000447533	0.000423369
GOTERM_BP_DIRECT	GO:0018108	peptidyl-tyrosine phosphorylation	1.68067	1.30159e-05	LYN, FGR, CSF1R, HCK, MELK, SYK, ABI3, FES, BTK, PDGFB, SH2D1B1, IL12RB1	628	65	18082	5.31563	0.0345831	0.000533258	0.000504465
GOTERM_BP_DIRECT	GO:0050715	positive regulation of cytokine secretion	1.2605	1.63267e-05	P2RX7, FGR, IL1A, SYK, CLEC4N, CLEC5A, CASP1, CLEC4E, TLR2	628	34	18082	7.62167	0.0431875	0.000651488	0.000616312
GOTERM_BP_DIRECT	GO:0007165	signal transduction	10.2241	1.63836e-05	ACVRL1, ARHGAP8, CD83, PLXND1, GPR65, LSP1, GPR132, GNGT2, RGS1, CCRL2, C3AR1, CCR7, CCR6, PLXNC1, CCR5, CMKLR1, FGB, ARRDC4, FCER1G, ANXA1, TICAM2, GPR35, NFAM1, ICOSL, TRAF1, GEM, TLR1, APBB1IP, ADORA2B, TLR12, TLR8, CD48, TLR7, TLR6, TLR5, PLCB2, TLR3, CARD11, TLR13, TLR2, CX3CR1, CD274, RGS14, RRAD, PTAFR, C5AR1, CXCR4, FPR2, NOD2, ARHGAP15, FYB, GPR31B, GNA15, GNG2, OLFR56, HRH2, PLCG2, LYN,…	628	1255	18082	1.67481	0.0433346	0.000651488	0.000616312
GOTERM_BP_DIRECT	GO:0050853	B cell receptor signaling pathway	1.54062	1.67157e-05	CD79B, LAT2, LYN, PTPRC, SYK, KLHL6, NFAM1, RFTN1, PLCG2, CD38, NCKAP1L	628	55	18082	5.7586	0.0441934	0.000655062	0.000619693
GOTERM_BP_DIRECT	GO:0007229	integrin-mediated signaling pathway	1.96078	1.87962e-05	FCER1G, ITGAM, SYK, PLEK, ITGB2, ITGAL, TSPAN32, VAV1, ADAM19, FGR, TYROBP, ZYX, ITGAX, FERMT3	628	93	18082	4.33443	0.0495555	0.000726071	0.000686868
GOTERM_BP_DIRECT	GO:0045766	positive regulation of angiogenesis	2.2409	1.9223e-05	ACVRL1, CX3CR1, CCL24, ERAP1, C5AR1, ITGB2, CYBB, PIK3R6, TGFBR2, C3, IL1A, LGALS3, IL1B, CCL5, C3AR1, CTSH	628	121	18082	3.80734	0.0506517	0.000732099	0.00069257
GOTERM_BP_DIRECT	GO:0008360	regulation of cell shape	2.38095	2.61786e-05	CSF1R, CCL24, CCL12, ANXA1, FBLIM1, LST1, MSN, ARHGAP15, CORO1A, ICAM1, FGR, HCK, CCL7, FES, CCL3, CCL2, PLEKHO1	628	139	18082	3.52145	0.0683405	0.000973262	0.000920712
GOTERM_BP_DIRECT	GO:0007166	cell surface receptor signaling pathway	3.08123	2.62752e-05	CD53, CD274, LAG3, FCER1G, ANXA1, SYK, PIK3CD, CXCL13, TNFRSF1B, ITGAL, TSPAN10, SPN, CD79B, FCGR1, FCGR3, CD4, BTLA, TSPAN4, IL12B, CD37, FCGR2B, CD22	628	219	18082	2.89245	0.0685838	0.000973262	0.000920712
GOTERM_BP_DIRECT	GO:0071356	cellular response to tumor necrosis factor	2.10084	2.68498e-05	CCL24, CCL12, VCAM1, CYBA, ICAM1, CCL9, CCL8, CCL7, CCL6, IRF1, CCL5, CCL4, CCL3, CCL2, BIRC3	628	110	18082	3.92632	0.0700299	0.000981107	0.000928133
GOTERM_BP_DIRECT	GO:0032689	negative regulation of interferon-gamma production	1.12045	2.82466e-05	CD274, AXL, NOD2, SH2D1B1, LGALS9, PDCD1LG2, PGLYRP1, HAVCR2	628	27	18082	8.53126	0.0735357	0.00101838	0.000963396
GOTERM_BP_DIRECT	GO:0043491	protein kinase B signaling	1.2605	3.89103e-05	CD40, CCL12, TGFB1, AXL, IL1B, CCL5, CCL3, CCL2, MERTK	628	38	18082	6.81939	0.0998695	0.00138439	0.00130964
GOTERM_BP_DIRECT	GO:0042127	regulation of cell proliferation	3.08123	4.46802e-05	CXCL9, TGFB1, ANXA1, NOS2, IL4RA, PLA2G4A, CXCL13, TNFRSF1B, KLF4, PTGS2, SAT1, TGFBR2, PTGS1, FGR, CNN2, CXCL10, HCK, FES, BTK, FAS, BID, PF4	628	227	18082	2.79051	0.113805	0.00156903	0.00148431
GOTERM_BP_DIRECT	GO:0043065	positive regulation of apoptotic process	3.92157	4.56533e-05	PTGS2, IFIT2, INPP5D, UBD, CASP1, TNFSF10, PMAIP1, BCL2A1D, BCL2A1A, BID, BCL2A1B, PHLDA3, TGM2, TGFB1, ANXA1, TNFRSF12A, SP110, MMP2, PLA2G4A, P2RX7, BMP2, MELK, IL1B, FAS, IRF5, PDCD1, TLR3, IDO1	628	335	18082	2.40658	0.116134	0.00158265	0.0014972
GOTERM_BP_DIRECT	GO:0043547	positive regulation of GTPase activity	2.38095	4.80367e-05	CCL24, CCL12, CD40, CAV2, VAV1, ICAM1, CCL9, CCL8, CCL7, CCL6, RGS1, CCL5, CCL4, CCL3, RGS10, CCL2, CCR7	628	146	18082	3.35261	0.121812	0.00164419	0.00155542
GOTERM_BP_DIRECT	GO:0002237	response to molecule of bacterial origin	0.840336	5.03723e-05	H2-M3, TAP2, TNFAIP3, CXCL1, B2M, TLR2	628	13	18082	13.2891	0.127341	0.00170258	0.00161065
GOTERM_BP_DIRECT	GO:0043123	positive regulation of I-kappaB kinase/NF-kappaB signaling	2.38095	6.15208e-05	CD40, TICAM2, CLEC4N, SHISA5, NOD2, LITAF, EDA2R, BST2, IL1A, UBD, IL1B, CASP1, TNFSF10, TLR6, TLR3, CARD11, TGM2	628	149	18082	3.28511	0.153256	0.00205373	0.00194284
GOTERM_BP_DIRECT	GO:0090026	positive regulation of monocyte chemotaxis	0.840336	7.61248e-05	CCR1, CXCL10, CCL5, CCL2, PLA2G7, AIF1	628	14	18082	12.3399	0.186044	0.00245049	0.00231818
GOTERM_BP_DIRECT	GO:0048246	macrophage chemotaxis	0.840336	7.61248e-05	CX3CR1, LGALS3, CCL12, GPR35, CCL3, CCL2	628	14	18082	12.3399	0.186044	0.00245049	0.00231818
GOTERM_BP_DIRECT	GO:0045060	negative thymic T cell selection	0.840336	7.61248e-05	SPN, CD74, PTPRC, FAS, CCR7, DOCK2	628	14	18082	12.3399	0.186044	0.00245049	0.00231818
GOTERM_BP_DIRECT	GO:0031668	cellular response to extracellular stimulus	0.980392	7.87298e-05	P2RX7, LYN, GSDMD, CDKN1A, ADORA2B, AXL, AIF1	628	22	18082	9.16141	0.191758	0.00250453	0.0023693
GOTERM_BP_DIRECT	GO:0050688	regulation of defense response to virus	0.70028	8.96771e-05	SPN, CD37, IFIT1, GBP4, TSPAN32	628	8	18082	17.9956	0.215334	0.00281961	0.00266737
GOTERM_BP_DIRECT	GO:0007249	I-kappaB kinase/NF-kappaB signaling	1.12045	9.20786e-05	TIFAB, RIPK3, IRF1, BCL3, TIFA, BTK, TLR8, NFKB2	628	32	18082	7.19825	0.220414	0.00286185	0.00270732
GOTERM_BP_DIRECT	GO:0030890	positive regulation of B cell proliferation	1.2605	9.90392e-05	SASH3, CD74, CD40, CDKN1A, PTPRC, CD38, NCKAP1L, CARD11, TNFSF13B	628	43	18082	6.02644	0.234951	0.00300901	0.00284654
GOTERM_BP_DIRECT	GO:0032720	negative regulation of tumor necrosis factor production	1.2605	9.90392e-05	TRIM30A, GPNMB, AXL, ACP5, TNFAIP3, PTPN22, NOD2, GPR18, HAVCR2	628	43	18082	6.02644	0.234951	0.00300901	0.00284654
GOTERM_BP_DIRECT	GO:0006958	complement activation, classical pathway	1.40056	0.000104495	C1QB, C3, C4B, C4BP, C1QA, C1RB, C1RA, C1RL, SERPING1, C1QC	628	55	18082	5.23509	0.246156	0.0031395	0.00296999
GOTERM_BP_DIRECT	GO:0045824	negative regulation of innate immune response	0.840336	0.000110937	CCR1, DHX58, TNFAIP3, NMI, IFI202B, HAVCR2	628	15	18082	11.5172	0.259175	0.00329642	0.00311843
GOTERM_BP_DIRECT	GO:0071345	cellular response to cytokine stimulus	1.12045	0.000113403	CD86, CSF1R, SOCS1, NOS2, STAT1, HCLS1, CXCR4, CCR7	628	33	18082	6.98012	0.264099	0.00333307	0.0031531
GOTERM_BP_DIRECT	GO:0045429	positive regulation of nitric oxide biosynthetic process	1.2605	0.000138511	IL1B, ITGB2, H2-M3, KLF4, PTGS2, TLR5, AIF1, ICAM1, TLR2	628	45	18082	5.7586	0.312408	0.0039844	0.00376926
GOTERM_BP_DIRECT	GO:0045907	positive regulation of vasoconstriction	1.2605	0.000138511	FGB, HRH2, PTAFR, TBXAS1, PDGFB, CD38, PTGS2, ICAM1, PTGS1	628	45	18082	5.7586	0.312408	0.0039844	0.00376926
GOTERM_BP_DIRECT	GO:0010759	positive regulation of macrophage chemotaxis	0.840336	0.000156774	CCL5, C5AR1, C3AR1, CCL2, CCR7, CMKLR1	628	16	18082	10.7974	0.345544	0.00441668	0.0041782
GOTERM_BP_DIRECT	GO:0002504	antigen processing and presentation of peptide or polysaccharide antigen via MHC class II	0.70028	0.000156989	H2-EB1, H2-DMA, H2-DMB1, H2-AA, H2-AB1	628	9	18082	15.9961	0.345924	0.00441668	0.0041782
GOTERM_BP_DIRECT	GO:0019884	antigen processing and presentation of exogenous antigen	0.560224	0.000161705	FCGR1, PSME2B, PSME1, PSME2	628	4	18082	28.793	0.354214	0.00441668	0.0041782
GOTERM_BP_DIRECT	GO:0048002	antigen processing and presentation of peptide antigen	0.560224	0.000161705	SLC11A1, H2-AA, CTSS, H2-AB1	628	4	18082	28.793	0.354214	0.00441668	0.0041782
GOTERM_BP_DIRECT	GO:0001805	positive regulation of type III hypersensitivity	0.560224	0.000161705	FCGR1, FCGR3, FCER1G, BTK	628	4	18082	28.793	0.354214	0.00441668	0.0041782
GOTERM_BP_DIRECT	GO:0031295	T cell costimulation	0.980392	0.000171007	SPN, CD274, CD80, BTLA, TNFRSF14, CARD11, TNFSF13B	628	25	18082	8.06204	0.370256	0.00457825	0.00433105
GOTERM_BP_DIRECT	GO:0032757	positive regulation of interleukin-8 production	0.980392	0.000171007	DDX58, IL1B, TLR7, NOD2, TLR5, TLR3, TLR2	628	25	18082	8.06204	0.370256	0.00457825	0.00433105
GOTERM_BP_DIRECT	GO:0007155	cell adhesion	4.7619	0.000188486	LGALS3BP, CX3CR1, ITGAM, SELPLG, CSF3R, FBLIM1, ITGB2, ITGAL, LY9, ICAM1, GPNMB, CHL1, STAB1, SPP1, ITGAX, AMICA1, VCAM1, TNFRSF12A, KLRA2, KLRA8, KLRA9, CLDN11, CD4, MAG, PARVG, SELL, FES, ZYX, HPSE, TGFBI, MFGE8, CD22, CD44, FERMT3	628	485	18082	2.01848	0.399333	0.00499674	0.00472694
GOTERM_BP_DIRECT	GO:0050868	negative regulation of T cell activation	0.840336	0.000215786	SPN, LAG3, PLA2G2D, TGFB1, PTPN22, TNFAIP8L2	628	17	18082	10.1622	0.442085	0.00566491	0.00535903
GOTERM_BP_DIRECT	GO:0002827	positive regulation of T-helper 1 type immune response	0.70028	0.000254476	SLC11A1, IL12B, IL12RB1, H2-AB1, IL27RA	628	10	18082	14.3965	0.497516	0.00661638	0.00625914
GOTERM_BP_DIRECT	GO:0030889	negative regulation of B cell proliferation	0.840336	0.000290298	LYN, CD300A, INPP5D, BTK, BTLA, FCGR2B	628	18	18082	9.59766	0.543917	0.00740534	0.0070055
GOTERM_BP_DIRECT	GO:0045579	positive regulation of B cell differentiation	0.840336	0.000290298	MMP14, SYK, INPP5D, NCKAP1L, IKZF1, IL2RG	628	18	18082	9.59766	0.543917	0.00740534	0.0070055
GOTERM_BP_DIRECT	GO:0010628	positive regulation of gene expression	4.06162	0.000349299	PDGFB, PIK3CD, PTPN22, IKZF1, IL2RG, CNN2, TRIM6, CCL5, CCL3, CTSH, LGALS9, CCR5, WNT10A, TGFB1, DDX58, SLC11A1, PLAUR, MSN, KLF4, P2RX7, IL1A, BMP2, MAF, IL1B, VIM, TLR3, CD44, TLR2, PF4	628	399	18082	2.09272	0.611192	0.00882715	0.00835054
GOTERM_BP_DIRECT	GO:0006801	superoxide metabolic process	0.840336	0.000382801	NRROS, NOS2, NCF2, SH3PXD2B, CYBB, CYBA	628	19	18082	9.09252	0.644877	0.00949628	0.00898353
GOTERM_BP_DIRECT	GO:0042346	positive regulation of NF-kappaB import into nucleus	0.840336	0.000382801	IL1B, TLR7, PTGS2, TLR3, IL18R1, TLR2	628	19	18082	9.09252	0.644877	0.00949628	0.00898353
GOTERM_BP_DIRECT	GO:0001819	positive regulation of cytokine production	0.980392	0.00040762	NFAM1, SLC11A1, LGALS9, TLR5, CARD11, TLR3, HAVCR2	628	29	18082	6.95003	0.667936	0.01002	0.00947901
GOTERM_BP_DIRECT	GO:0030217	T cell differentiation	1.12045	0.000469331	CD4, PTPRC, TGFB1, RHOH, PTPN22, IKZF1, BCL2A1D, VAV1	628	41	18082	5.61815	0.718991	0.0114331	0.0108158
GOTERM_BP_DIRECT	GO:0032722	positive regulation of chemokine production	0.840336	0.000495937	ADORA2B, TLR7, LGALS9, TLR3, HAVCR2, TLR2	628	20	18082	8.6379	0.738506	0.0119733	0.0113268
GOTERM_BP_DIRECT	GO:0035457	cellular response to interferon-alpha	0.70028	0.00056746	IFI204, AXL, IFIT1, IFIT3, IFIT2	628	12	18082	11.9971	0.784511	0.0133427	0.0126223
GOTERM_BP_DIRECT	GO:0032740	positive regulation of interleukin-17 production	0.70028	0.00056746	TGFB1, IL12B, SLAMF6, NOD2, LY9	628	12	18082	11.9971	0.784511	0.0133427	0.0126223
GOTERM_BP_DIRECT	GO:0001818	negative regulation of cytokine production	0.70028	0.00056746	GPNMB, AXL, SLC11A1, BTK, MERTK	628	12	18082	11.9971	0.784511	0.0133427	0.0126223
GOTERM_BP_DIRECT	GO:0042981	regulation of apoptotic process	2.52101	0.000586841	CD40, NLRP1A, TGFB1, NOD2, TRAF1, TNFRSF1B, BMP2, SELL, CASP4, BCL3, CASP1, PMAIP1, FAS, TNFRSF14, BCL2A1A, BID, CARD11, BIRC3	628	199	18082	2.60439	0.795519	0.0136795	0.0129408
GOTERM_BP_DIRECT	GO:0043029	T cell homeostasis	0.980392	0.000595681	P2RX7, TGFB1, RIPK3, PMAIP1, FAS, NCKAP1L, CORO1A	628	31	18082	6.50164	0.800352	0.0137668	0.0130235
GOTERM_BP_DIRECT	GO:0050829	defense response to Gram-negative bacterium	1.2605	0.000653318	GSDMD, CD4, LYZ2, SLC11A1, IL12B, TNFRSF14, TLR5, B2M, IIGP1	628	56	18082	4.62745	0.829181	0.0149709	0.0141626
GOTERM_BP_DIRECT	GO:2000503	positive regulation of natural killer cell chemotaxis	0.560224	0.000767314	CCL7, CCL5, CCL4, CCL3	628	6	18082	19.1953	0.874521	0.0172902	0.0163566
GOTERM_BP_DIRECT	GO:0002819	regulation of adaptive immune response	0.560224	0.000767314	RIPK3, IRF1, IRF7, CD48	628	6	18082	19.1953	0.874521	0.0172902	0.0163566
GOTERM_BP_DIRECT	GO:0030595	leukocyte chemotaxis	0.840336	0.000795355	CCR1, CCL4, CCL3, IL16, CORO1A, PF4	628	22	18082	7.85263	0.88369	0.0176708	0.0167167
GOTERM_BP_DIRECT	GO:0042535	positive regulation of tumor necrosis factor biosynthetic process	0.70028	0.000797277	SPN, TLR1, FCGR3, CYBB, TLR2	628	13	18082	11.0742	0.884293	0.0176708	0.0167167
GOTERM_BP_DIRECT	GO:0006915	apoptotic process	5.04202	0.000815782	NCF1, DAPL1, GPR65, C5AR1, TNFAIP3, LSP1, LITAF, IFIT2, CASP7, DRAM1, INPP5D, CASP1, TNFSF10, PMAIP1, BCL2A1A, BID, PGLYRP1, PHLDA3, SRGN, TNFRSF12A, SP110, STAT1, SHISA5, TRAF1, TMEM173, SERPINA3G, TGFBR2, MELK, NAIP6, IRF1, BTK, FAS, PDCD1, XAF1, DNASE1L3, BIRC3	628	570	18082	1.8185	0.889945	0.0179339	0.0169656
GOTERM_BP_DIRECT	GO:0007010	cytoskeleton organization	1.68067	0.00095933	CNN2, HCK, CCL24, CCL12, CCL7, GPR35, KRT25, CCL3, CCL2, LSP1, DOCK2, TSPAN32	628	104	18082	3.32227	0.925375	0.0209196	0.0197901
GOTERM_BP_DIRECT	GO:0032733	positive regulation of interleukin-10 production	0.840336	0.000987562	SASH3, CD83, FCER1G, IL12B, NOD2, TLR2	628	23	18082	7.51122	0.930864	0.0213629	0.0202095
GOTERM_BP_DIRECT	GO:0042110	T cell activation	0.980392	0.00099625	CD4, TGFB1, ICOSL, CD48, DOCK2, CARD11, VAV1	628	34	18082	5.92797	0.932471	0.0213798	0.0202255
GOTERM_BP_DIRECT	GO:0007568	aging	2.2409	0.00103937	CD86, CIITA, TGFB1, VCAM1, ITGB2, TNFRSF1B, LITAF, NFKB2, TGFBR2, CASP7, KRT25, SERPING1, CCL2, TIMP1, IFI27L2A, CTSC	628	173	18082	2.66294	0.939911	0.0221296	0.0209348
GOTERM_BP_DIRECT	GO:0032693	negative regulation of interleukin-10 production	0.70028	0.00108574	CD274, IL12B, PDCD1LG2, FCGR2B, IDO1	628	14	18082	10.2832	0.946998	0.0229362	0.0216978
GOTERM_BP_DIRECT	GO:0050869	negative regulation of B cell activation	0.560224	0.00130822	INPP5D, FAS, TNFAIP3, SAMSN1	628	7	18082	16.4531	0.970979	0.0267987	0.0253517
GOTERM_BP_DIRECT	GO:0031622	positive regulation of fever generation	0.560224	0.00130822	IL1B, CCL5, CCR5, PTGS2	628	7	18082	16.4531	0.970979	0.0267987	0.0253517
GOTERM_BP_DIRECT	GO:0045730	respiratory burst	0.560224	0.00130822	NCF1, SLC11A1, CYBB, CYBA	628	7	18082	16.4531	0.970979	0.0267987	0.0253517
GOTERM_BP_DIRECT	GO:0072540	T-helper 17 cell lineage commitment	0.560224	0.00130822	TGFB1, SLAMF6, LY9, BATF	628	7	18082	16.4531	0.970979	0.0267987	0.0253517
GOTERM_BP_DIRECT	GO:0051092	positive regulation of NF-kappaB transcription factor activity	1.68067	0.00141311	CD40, TGFB1, RIPK3, IL1B, ITGB2, NOD2, TRAF1, CARD11, EDA2R, TLR3, ICAM1, TLR2	628	109	18082	3.16987	0.978154	0.0286348	0.0270887
GOTERM_BP_DIRECT	GO:0002690	positive regulation of leukocyte chemotaxis	0.70028	0.00144021	CXCL10, CXCL9, CXCL13, GPSM3, PF4	628	15	18082	9.59766	0.9797	0.0286348	0.0270887
GOTERM_BP_DIRECT	GO:0032695	negative regulation of interleukin-12 production	0.70028	0.00144021	ACP5, NOD2, MEFV, TLR2, CMKLR1	628	15	18082	9.59766	0.9797	0.0286348	0.0270887
GOTERM_BP_DIRECT	GO:0006956	complement activation	0.70028	0.00144021	C3, C4B, C1RB, C1RA, CFB	628	15	18082	9.59766	0.9797	0.0286348	0.0270887
GOTERM_BP_DIRECT	GO:0032728	positive regulation of interferon-beta production	0.840336	0.00147252	IFIH1, DDX58, IRF1, IRF7, TLR3, TLR2	628	25	18082	6.91032	0.981401	0.0290635	0.0274943
GOTERM_BP_DIRECT	GO:0032956	regulation of actin cytoskeleton organization	1.12045	0.00159336	FGR, BST2, IL1A, FSCN1, CORO1A, PAM, GPM6B, MYO1F	628	50	18082	4.60688	0.986592	0.0312206	0.0295349
GOTERM_BP_DIRECT	GO:0019221	cytokine-mediated signaling pathway	1.96078	0.00172918	CX3CR1, CSF1R, CCL12, IL1RN, STAT1, PIRB, IIGP1, IL1A, SOCS1, IL1B, CCL2, IRF5, CD44, PF4	628	146	18082	2.76097	0.990719	0.0336381	0.0318218
GOTERM_BP_DIRECT	GO:0048661	positive regulation of smooth muscle cell proliferation	1.40056	0.00177051	STAT1, CCL5, PTAFR, C3AR1, PDGFB, CYBA, PTGS2, AIF1, TGFBR2, TGM2	628	80	18082	3.59912	0.991702	0.0337378	0.0319161
GOTERM_BP_DIRECT	GO:0001782	B cell homeostasis	0.840336	0.00177173	LYN, PIK3CD, NCKAP1L, BCL2A1A, PIRB, TNFSF13B	628	26	18082	6.64454	0.991729	0.0337378	0.0319161
GOTERM_BP_DIRECT	GO:0001836	release of cytochrome c from mitochondria	0.840336	0.00177173	PMAIP1, SFN, BCL2A1D, BID, BCL2A1A, BCL2A1B	628	26	18082	6.64454	0.991729	0.0337378	0.0319161
GOTERM_BP_DIRECT	GO:0050852	T cell receptor signaling pathway	1.12045	0.00179262	PTPRC, THEMIS2, RFTN1, PLCG2, LCP2, PTPN22, BCL2A1D, FYB	628	51	18082	4.51655	0.992184	0.0338968	0.0320666
GOTERM_BP_DIRECT	GO:0043306	positive regulation of mast cell degranulation	0.70028	0.00186802	FGR, FCER1G, SYK, ADORA2B, IL4RA	628	16	18082	8.99781	0.993628	0.0345968	0.0327288
GOTERM_BP_DIRECT	GO:2000406	positive regulation of T cell migration	0.70028	0.00186802	CXCL10, CCL5, TNFRSF14, LGALS9, AIF1	628	16	18082	8.99781	0.993628	0.0345968	0.0327288
GOTERM_BP_DIRECT	GO:0033280	response to vitamin D	0.70028	0.00186802	CXCL10, CD4, TGFB1, SPP1, PTGS2	628	16	18082	8.99781	0.993628	0.0345968	0.0327288
GOTERM_BP_DIRECT	GO:0048839	inner ear development	1.2605	0.00195198	C1QB, H2-T23, BMP2, TGFB1, MAF, IFI204, H2-DMA, H2-K1, MYO7A	628	66	18082	3.92632	0.994924	0.0356882	0.0337612
GOTERM_BP_DIRECT	GO:0007204	positive regulation of cytosolic calcium ion concentration	1.96078	0.00195335	CCR1, GPR35, C5AR1, CXCL1, FPR2, CXCL13, GNA15, IL1B, C3AR1, CCL3, PLCG2, CD38, CCR6, CCR5	628	148	18082	2.72366	0.994943	0.0356882	0.0337612
GOTERM_BP_DIRECT	GO:0043615	astrocyte cell migration	0.560224	0.00203935	CCL12, MMP14, CCL3, CCL2	628	8	18082	14.3965	0.995994	0.0360418	0.0340958
GOTERM_BP_DIRECT	GO:0032494	response to peptidoglycan	0.560224	0.00203935	C5AR1, IRF5, NOD2, TLR2	628	8	18082	14.3965	0.995994	0.0360418	0.0340958
GOTERM_BP_DIRECT	GO:0070723	response to cholesterol	0.560224	0.00203935	TGFB1, CCL3, CCR5, TGFBR2	628	8	18082	14.3965	0.995994	0.0360418	0.0340958
GOTERM_BP_DIRECT	GO:0001798	positive regulation of type IIa hypersensitivity	0.560224	0.00203935	FCGR1, C3, FCGR3, FCER1G	628	8	18082	14.3965	0.995994	0.0360418	0.0340958
GOTERM_BP_DIRECT	GO:0002223	stimulatory C-type lectin receptor signaling pathway	0.560224	0.00203935	FCER1G, SYK, CLEC4N, PLCG2	628	8	18082	14.3965	0.995994	0.0360418	0.0340958
GOTERM_BP_DIRECT	GO:0007169	transmembrane receptor protein tyrosine kinase signaling pathway	1.54062	0.00245618	LYN, FGR, CSF1R, DOK1, HCK, PILRB1, PILRB2, SYK, BTK, LCP2, PILRA	628	100	18082	3.16723	0.998706	0.0431266	0.040798
GOTERM_BP_DIRECT	GO:0000165	MAPK cascade	1.2605	0.00259587	DOK1, CCL12, TGFB1, IL1B, CCL5, LRRK2, SLC11A1, CCL3, CCL2	628	69	18082	3.75561	0.999114	0.0452853	0.0428402
GOTERM_BP_DIRECT	GO:0097191	extrinsic apoptotic signaling pathway	0.980392	0.00271339	P2RX7, TGFB1, TNFRSF12A, FAS, TNFRSF1B, BID, TLR3	628	41	18082	4.91588	0.999355	0.0470321	0.0444926
GOTERM_BP_DIRECT	GO:0042113	B cell activation	0.840336	0.00293611	LAT2, CD86, CD40, BLNK, PIK3CD, ICOSL	628	29	18082	5.95717	0.999648	0.0488445	0.0462072
GOTERM_BP_DIRECT	GO:0035234	ectopic germ cell programmed cell death	0.560224	0.00298053	IL1A, RHOX5, IL1B, CASP4	628	9	18082	12.7969	0.999688	0.0488445	0.0462072
GOTERM_BP_DIRECT	GO:0002485	antigen processing and presentation of endogenous peptide antigen via MHC class I via ER pathway, TAP-dependent	0.560224	0.00298053	H2-K1, TAP2, TAP1, H2-D1	628	9	18082	12.7969	0.999688	0.0488445	0.0462072
GOTERM_BP_DIRECT	GO:0045410	positive regulation of interleukin-6 biosynthetic process	0.560224	0.00298053	TLR1, IL1B, PTAFR, TLR6	628	9	18082	12.7969	0.999688	0.0488445	0.0462072
GOTERM_BP_DIRECT	GO:0045627	positive regulation of T-helper 1 cell differentiation	0.560224	0.00298053	ANXA1, HLX, IRF1, CCR7	628	9	18082	12.7969	0.999688	0.0488445	0.0462072
GOTERM_BP_DIRECT	GO:0002862	negative regulation of inflammatory response to antigenic stimulus	0.560224	0.00298053	GPX2, IL12B, NOD2, FCGR2B	628	9	18082	12.7969	0.999688	0.0488445	0.0462072
GOTERM_BP_DIRECT	GO:0050798	activated T cell proliferation	0.560224	0.00298053	ITGAM, ITGB2, ITGAX, ITGAL	628	9	18082	12.7969	0.999688	0.0488445	0.0462072
GOTERM_BP_DIRECT	GO:0002606	positive regulation of dendritic cell antigen processing and presentation	0.560224	0.00298053	CD74, SLC11A1, CCR7, NOD2	628	9	18082	12.7969	0.999688	0.0488445	0.0462072
GOTERM_BP_DIRECT	GO:0002481	antigen processing and presentation of exogenous protein antigen via MHC class Ib, TAP-dependent	0.560224	0.00298053	H2-M3, TAP2, TAP1, B2M	628	9	18082	12.7969	0.999688	0.0488445	0.0462072
GOTERM_BP_DIRECT	GO:0050728	negative regulation of inflammatory response	1.40056	0.0031639	NR1H3, ACP5, TNFAIP3, TNFAIP8L2, LGALS9, AOAH, TNFRSF1B, MEFV, PGLYRP1, CD44	628	87	18082	3.30954	0.99981	0.0515373	0.0487546
GOTERM_BP_DIRECT	GO:0048535	lymph node development	0.840336	0.00342439	TGFB1, RIPK3, CCR7, IKZF1, CXCL13, NFKB2	628	30	18082	5.7586	0.999906	0.0549957	0.0520263
GOTERM_BP_DIRECT	GO:0051603	proteolysis involved in cellular protein catabolic process	1.12045	0.00342463	CTSZ, CTSH, CTSS, PSMB8, PSMB10, CTSC, PSMB9, CTSB	628	57	18082	4.04112	0.999906	0.0549957	0.0520263
GOTERM_BP_DIRECT	GO:0002230	positive regulation of defense response to virus by host	1.68067	0.003456	TRIM6, DDX58, CCL5, STAT2, DKKL1, SLC1A3, IL12B, STOM, PTPN22, IL12RB1, TMEM173, ASB2	628	122	18082	2.8321	0.999914	0.0549957	0.0520263
GOTERM_BP_DIRECT	GO:0002768	immune response-regulating cell surface receptor signaling pathway	0.420168	0.00351859	LYN, CD40, BTLA	628	3	18082	28.793	0.999927	0.0549957	0.0520263
GOTERM_BP_DIRECT	GO:0042531	positive regulation of tyrosine phosphorylation of STAT protein	0.420168	0.00351859	LYN, CCL5, HCLS1	628	3	18082	28.793	0.999927	0.0549957	0.0520263
GOTERM_BP_DIRECT	GO:0002291	T cell activation via T cell receptor contact with antigen bound to MHC molecule on antigen presenting cell	0.420168	0.00351859	APBB1IP, ITGAL, ICAM1	628	3	18082	28.793	0.999927	0.0549957	0.0520263
GOTERM_BP_DIRECT	GO:0032493	response to bacterial lipoprotein	0.420168	0.00351859	TLR1, TLR6, TLR2	628	3	18082	28.793	0.999927	0.0549957	0.0520263
GOTERM_BP_DIRECT	GO:0009611	response to wounding	1.12045	0.0037808	TGFB1, FABP5, PDGFB, SLC1A3, CCL2, TNFAIP3, LCP1, SULF2	628	58	18082	3.97145	0.999964	0.0587545	0.0555821
GOTERM_BP_DIRECT	GO:0042771	intrinsic apoptotic signaling pathway in response to DNA damage by p53 class mediator	0.840336	0.00396837	CDKN1A, IFI204, BCL3, SHISA5, PMAIP1, PHLDA3	628	31	18082	5.57284	0.999979	0.0609686	0.0576766
GOTERM_BP_DIRECT	GO:0012501	programmed cell death	0.840336	0.00396837	P2RX7, GSDMD, RIPK3, MLKL, CASP4, EDA2R	628	31	18082	5.57284	0.999979	0.0609686	0.0576766
GOTERM_BP_DIRECT	GO:0060340	positive regulation of type I interferon-mediated signaling pathway	0.560224	0.00414883	ZBP1, TRIM6, NLRC5, IRF7	628	10	18082	11.5172	0.999987	0.0626729	0.0592889
GOTERM_BP_DIRECT	GO:0070269	pyroptosis	0.560224	0.00414883	GSDMD, NAIP6, CASP4, CASP1	628	10	18082	11.5172	0.999987	0.0626729	0.0592889
GOTERM_BP_DIRECT	GO:0032480	negative regulation of type I interferon production	0.560224	0.00414883	DDX58, DHX58, NMI, HAVCR2	628	10	18082	11.5172	0.999987	0.0626729	0.0592889
GOTERM_BP_DIRECT	GO:0006911	phagocytosis, engulfment	0.980392	0.00437398	FCGR1, FCGR3, FCER1G, BIN2, FCGR2B, MFGE8, AIF1	628	45	18082	4.47891	0.999993	0.0657069	0.0621591
GOTERM_BP_DIRECT	GO:0033198	response to ATP	0.70028	0.00445477	P2RX7, SELL, IL1B, PLCG2, CASP1	628	20	18082	7.19825	0.999994	0.0665508	0.0629575
GOTERM_BP_DIRECT	GO:2001238	positive regulation of extrinsic apoptotic signaling pathway	0.840336	0.00457142	PTPRC, TNFRSF12A, TNFSF10, FAS, BID, RUNX3	628	32	18082	5.39869	0.999996	0.0679182	0.0642511
GOTERM_BP_DIRECT	GO:0045954	positive regulation of natural killer cell mediated cytotoxicity	0.70028	0.00535413	LAG3, H2-M3, SLAMF6, SH2D1B1, VAV1	628	21	18082	6.85547	1	0.0786824	0.074434
GOTERM_BP_DIRECT	GO:0090280	positive regulation of calcium ion import	0.70028	0.00535413	LGALS3, CCL12, PDGFB, CCL2, CXCR4	628	21	18082	6.85547	1	0.0786824	0.074434
GOTERM_BP_DIRECT	GO:0032495	response to muramyl dipeptide	0.560224	0.00555879	NLRP1A, TNFAIP3, IRF5, NOD2	628	11	18082	10.4702	1	0.0808117	0.0764484
GOTERM_BP_DIRECT	GO:0042554	superoxide anion generation	0.560224	0.00555879	NCF1, NCF2, CYBB, CYBA	628	11	18082	10.4702	1	0.0808117	0.0764484
GOTERM_BP_DIRECT	GO:0045582	positive regulation of T cell differentiation	0.70028	0.00636719	CD74, PTPRC, H2-DMA, H2-AA, PIK3R6	628	22	18082	6.54386	1	0.0920689	0.0870977
GOTERM_BP_DIRECT	GO:2000427	positive regulation of apoptotic cell clearance	0.420168	0.00687547	C3, CCL2, MFGE8	628	4	18082	21.5947	1	0.0938953	0.0888255
GOTERM_BP_DIRECT	GO:0060333	interferon-gamma-mediated signaling pathway	0.420168	0.00687547	STAT1, IRF1, NMI	628	4	18082	21.5947	1	0.0938953	0.0888255
GOTERM_BP_DIRECT	GO:0002666	positive regulation of T cell tolerance induction	0.420168	0.00687547	H2-M3, TGFBR2, IDO1	628	4	18082	21.5947	1	0.0938953	0.0888255
GOTERM_BP_DIRECT	GO:0030886	negative regulation of myeloid dendritic cell activation	0.420168	0.00687547	CD37, TSPAN32, HAVCR2	628	4	18082	21.5947	1	0.0938953	0.0888255
GOTERM_BP_DIRECT	GO:0001845	phagolysosome assembly	0.420168	0.00687547	P2RX7, MYO7A, CORO1A	628	4	18082	21.5947	1	0.0938953	0.0888255
GOTERM_BP_DIRECT	GO:2000566	positive regulation of CD8-positive, alpha-beta T cell proliferation	0.420168	0.00687547	H2-T23, PTPN22, CD244	628	4	18082	21.5947	1	0.0938953	0.0888255
GOTERM_BP_DIRECT	GO:0043372	positive regulation of CD4-positive, alpha-beta T cell differentiation	0.420168	0.00687547	SASH3, CD83, NCKAP1L	628	4	18082	21.5947	1	0.0938953	0.0888255
GOTERM_BP_DIRECT	GO:0002283	neutrophil activation involved in immune response	0.420168	0.00687547	TYROBP, FCER1G, SYK	628	4	18082	21.5947	1	0.0938953	0.0888255
GOTERM_BP_DIRECT	GO:0032649	regulation of interferon-gamma production	0.420168	0.00687547	RIPK3, ISG15, CCR7	628	4	18082	21.5947	1	0.0938953	0.0888255
GOTERM_BP_DIRECT	GO:0045356	positive regulation of interferon-alpha biosynthetic process	0.420168	0.00687547	TLR8, TLR7, TLR3	628	4	18082	21.5947	1	0.0938953	0.0888255
GOTERM_BP_DIRECT	GO:0034154	toll-like receptor 7 signaling pathway	0.420168	0.00687547	UNC93B1, TLR7, HAVCR2	628	4	18082	21.5947	1	0.0938953	0.0888255
GOTERM_BP_DIRECT	GO:0010033	response to organic substance	1.12045	0.0071158	P2RX7, TGFB1, BTK, SPP1, IL12B, PLA2G4A, KLF4, CTSC	628	65	18082	3.54375	1	0.0962061	0.0910115
GOTERM_BP_DIRECT	GO:0001666	response to hypoxia	2.10084	0.00719029	ACVRL1, TGFB1, VCAM1, NOS2, MMP2, CXCR4, CYBA, TGFBR2, MMP14, BMP2, CASP1, CCL2, CD38, PAM, TLR2	628	192	18082	2.24945	1	0.0962061	0.0910115
GOTERM_BP_DIRECT	GO:0045059	positive thymic T cell selection	0.560224	0.00722257	CD74, PTPRC, H2-DMA, DOCK2	628	12	18082	9.59766	1	0.0962061	0.0910115
GOTERM_BP_DIRECT	GO:0032700	negative regulation of interleukin-17 production	0.560224	0.00722257	TGFB1, IL12B, NCKAP1L, TLR2	628	12	18082	9.59766	1	0.0962061	0.0910115
GOTERM_BP_DIRECT	GO:0007252	I-kappaB phosphorylation	0.560224	0.00722257	SAA3, TLR7, TLR3, TLR2	628	12	18082	9.59766	1	0.0962061	0.0910115
GOTERM_BP_DIRECT	GO:0030501	positive regulation of bone mineralization	0.840336	0.00858763	P2RX7, BMP2, TGFB1, TMEM119, ISG15, GPM6B	628	37	18082	4.66913	1	0.113828	0.107682
GOTERM_BP_DIRECT	GO:0042098	T cell proliferation	0.70028	0.00875725	P2RX7, PTPRC, CXCR4, DOCK2, PSMB10	628	24	18082	5.99854	1	0.11495	0.108743
GOTERM_BP_DIRECT	GO:0050850	positive regulation of calcium-mediated signaling	0.70028	0.00875725	CD4, SYK, CCL4, CCL3, ITGAL	628	24	18082	5.99854	1	0.11495	0.108743
GOTERM_BP_DIRECT	GO:0045078	positive regulation of interferon-gamma biosynthetic process	0.560224	0.00915016	IL12B, TLR8, TLR7, TLR3	628	13	18082	8.85938	1	0.118383	0.111991
GOTERM_BP_DIRECT	GO:0051085	chaperone mediated protein folding requiring cofactor	0.560224	0.00915016	CD74, H2-DMB2, H2-DMA, H2-DMB1	628	13	18082	8.85938	1	0.118383	0.111991
GOTERM_BP_DIRECT	GO:0002523	leukocyte migration involved in inflammatory response	0.560224	0.00915016	ITGAM, ITGB2, CCL2, CCR6	628	13	18082	8.85938	1	0.118383	0.111991
GOTERM_BP_DIRECT	GO:0072593	reactive oxygen species metabolic process	0.840336	0.00961322	P2RX7, LRRK2, PDGFB, PMAIP1, CYBA, VAV1	628	38	18082	4.54626	1	0.123782	0.117098
GOTERM_BP_DIRECT	GO:0043410	positive regulation of MAPK cascade	1.40056	0.0101247	P2RX7, CD40, BMP2, PTPRC, CAV2, PDGFB, FAS, TNFRSF14, NOD2, TNFRSF1B	628	104	18082	2.76856	1	0.129394	0.122408
GOTERM_BP_DIRECT	GO:0045672	positive regulation of osteoclast differentiation	0.70028	0.0101448	CCR1, CSF1R, CCL5, CCL3, IL12B	628	25	18082	5.7586	1	0.129394	0.122408
GOTERM_BP_DIRECT	GO:0030168	platelet activation	0.840336	0.01072	FGB, SYK, AXL, MERTK, VAV1, PF4	628	39	18082	4.42969	1	0.135159	0.127861
GOTERM_BP_DIRECT	GO:0034605	cellular response to heat	0.840336	0.01072	LYN, CXCL10, IL1A, CDKN1A, TFEC, MYOF	628	39	18082	4.42969	1	0.135159	0.127861
GOTERM_BP_DIRECT	GO:0022614	membrane to membrane docking	0.420168	0.0111966	VCAM1, MSN, ICAM1	628	5	18082	17.2758	1	0.135159	0.127861
GOTERM_BP_DIRECT	GO:0001660	fever generation	0.420168	0.0111966	IL1A, IL1RN, IL1B	628	5	18082	17.2758	1	0.135159	0.127861
GOTERM_BP_DIRECT	GO:1900426	positive regulation of defense response to bacterium	0.420168	0.0111966	CYBA, LGALS9, HAVCR2	628	5	18082	17.2758	1	0.135159	0.127861
GOTERM_BP_DIRECT	GO:0032020	ISG15-protein conjugation	0.420168	0.0111966	UBA7, ISG15, UBE2L6	628	5	18082	17.2758	1	0.135159	0.127861
GOTERM_BP_DIRECT	GO:2000110	negative regulation of macrophage apoptotic process	0.420168	0.0111966	CCL5, NOD2, CCR5	628	5	18082	17.2758	1	0.135159	0.127861
GOTERM_BP_DIRECT	GO:0045621	positive regulation of lymphocyte differentiation	0.420168	0.0111966	INPP5D, NCKAP1L, IL2RG	628	5	18082	17.2758	1	0.135159	0.127861
GOTERM_BP_DIRECT	GO:0098542	defense response to other organism	0.420168	0.0111966	NRROS, TLR8, TLR13	628	5	18082	17.2758	1	0.135159	0.127861
GOTERM_BP_DIRECT	GO:0071726	cellular response to diacyl bacterial lipopeptide	0.420168	0.0111966	TLR1, TLR6, TLR2	628	5	18082	17.2758	1	0.135159	0.127861
GOTERM_BP_DIRECT	GO:0034123	positive regulation of toll-like receptor signaling pathway	0.420168	0.0111966	TLR5, TLR3, TLR2	628	5	18082	17.2758	1	0.135159	0.127861
GOTERM_BP_DIRECT	GO:0002636	positive regulation of germinal center formation	0.420168	0.0111966	H2-DMA, TNFSF13, TNFSF13B	628	5	18082	17.2758	1	0.135159	0.127861
GOTERM_BP_DIRECT	GO:0001934	positive regulation of protein phosphorylation	1.96078	0.0120251	CSF1R, CD40, TGFB1, LRRK2, PLAUR, CXCR4, AIF1, SPN, P2RX7, C3, BMP2, GPNMB, IL1B, TLR3	628	184	18082	2.19077	1	0.144515	0.136712
GOTERM_BP_DIRECT	GO:0031100	organ regeneration	0.980392	0.0126744	CDKN1A, TGFB1, AXL, C5AR1, CCL2, LCP1, TGFBR2	628	56	18082	3.59912	1	0.151644	0.143456
GOTERM_BP_DIRECT	GO:0043434	response to peptide hormone	1.12045	0.0131573	ANXA1, SERPINA3F, STAT1, SERPINA3M, TIMP1, SERPINA3N, SERPINA3G, SERPINA3I	628	73	18082	3.1554	1	0.155723	0.147315
GOTERM_BP_DIRECT	GO:0038083	peptidyl-tyrosine autophosphorylation	0.840336	0.0131881	LYN, FGR, HCK, SYK, FES, BTK	628	41	18082	4.21361	1	0.155723	0.147315
GOTERM_BP_DIRECT	GO:0051930	regulation of sensory perception of pain	0.840336	0.0131881	IL1A, KCNJ10, FCGR4, CCL3, CTSS, FAM19A4	628	41	18082	4.21361	1	0.155723	0.147315
GOTERM_BP_DIRECT	GO:0060135	maternal process involved in female pregnancy	0.70028	0.0133288	IFI27, CCL2, PAM, ADCY7, HAVCR2	628	27	18082	5.33204	1	0.1567	0.148239
GOTERM_BP_DIRECT	GO:0016042	lipid catabolic process	1.40056	0.013513	PLA2G16, PLA2G2D, LIPG, PLCG2, PLD4, PLBD1, PLA2G4A, PLA2G7, PLCB2, PLB1	628	109	18082	2.64156	1	0.158178	0.149637
GOTERM_BP_DIRECT	GO:2000249	regulation of actin cytoskeleton reorganization	0.560224	0.0138269	CSF1R, TGFB1, GMFG, ARHGDIB	628	15	18082	7.67813	1	0.160463	0.151799
GOTERM_BP_DIRECT	GO:0071360	cellular response to exogenous dsRNA	0.560224	0.0138269	CIITA, TMEM173, IFIT1, TLR3	628	15	18082	7.67813	1	0.160463	0.151799
GOTERM_BP_DIRECT	GO:0097192	extrinsic apoptotic signaling pathway in absence of ligand	0.840336	0.0145548	IL1A, IL1B, FAS, BCL2A1D, BCL2A1A, BCL2A1B	628	42	18082	4.11328	1	0.168188	0.159107
GOTERM_BP_DIRECT	GO:0042493	response to drug	2.94118	0.0149263	LYN, CD86, TGIF1, CDKN1A, TGFB1, ANXA1, STAT1, MMP2, SLC1A3, CYBB, CYBA, PTGS2, TGFBR2, ICAM1, P2RX7, CASP1, CCL3, CD38, NCKAP1L, B2M, PAM	628	339	18082	1.78364	1	0.171748	0.162474
GOTERM_BP_DIRECT	GO:0002693	positive regulation of cellular extravasation	0.420168	0.0164112	PTAFR, CCL2, ICAM1	628	6	18082	14.3965	1	0.180848	0.171083
GOTERM_BP_DIRECT	GO:0010818	T cell chemotaxis	0.420168	0.0164112	CXCL10, CCL3, CXCL16	628	6	18082	14.3965	1	0.180848	0.171083
GOTERM_BP_DIRECT	GO:0097350	neutrophil clearance	0.420168	0.0164112	ANXA1, AXL, MERTK	628	6	18082	14.3965	1	0.180848	0.171083
GOTERM_BP_DIRECT	GO:0045629	negative regulation of T-helper 2 cell differentiation	0.420168	0.0164112	ANXA1, HLX, IRF1	628	6	18082	14.3965	1	0.180848	0.171083
GOTERM_BP_DIRECT	GO:0019941	modification-dependent protein catabolic process	0.420168	0.0164112	UBA7, ISG15, UBE2L6	628	6	18082	14.3965	1	0.180848	0.171083
GOTERM_BP_DIRECT	GO:0045588	positive regulation of gamma-delta T cell differentiation	0.420168	0.0164112	PTPRC, SYK, NCKAP1L	628	6	18082	14.3965	1	0.180848	0.171083
GOTERM_BP_DIRECT	GO:0070234	positive regulation of T cell apoptotic process	0.420168	0.0164112	CCL5, PDCD1, IDO1	628	6	18082	14.3965	1	0.180848	0.171083
GOTERM_BP_DIRECT	GO:0042270	protection from natural killer cell mediated cytotoxicity	0.420168	0.0164112	H2-T23, TAP2, TAP1	628	6	18082	14.3965	1	0.180848	0.171083
GOTERM_BP_DIRECT	GO:2000679	positive regulation of transcription regulatory region DNA binding	0.560224	0.0165866	TRIM6, TGFB1, LGALS9, KLF4	628	16	18082	7.19825	1	0.180848	0.171083
GOTERM_BP_DIRECT	GO:0071361	cellular response to ethanol	0.560224	0.0165866	SPI1, CCL7, CYBB, ADCY7	628	16	18082	7.19825	1	0.180848	0.171083
GOTERM_BP_DIRECT	GO:0001779	natural killer cell differentiation	0.560224	0.0165866	AXL, SLAMF6, IKZF1, MERTK	628	16	18082	7.19825	1	0.180848	0.171083
GOTERM_BP_DIRECT	GO:0042993	positive regulation of transcription factor import into nucleus	0.560224	0.0165866	DDX58, HCLS1, PTPN22, TMEM173	628	16	18082	7.19825	1	0.180848	0.171083
GOTERM_BP_DIRECT	GO:0001516	prostaglandin biosynthetic process	0.560224	0.0165866	CD74, TBXAS1, PTGS2, PTGS1	628	16	18082	7.19825	1	0.180848	0.171083
GOTERM_BP_DIRECT	GO:0006898	receptor-mediated endocytosis	0.980392	0.0174151	FCGR1, MSR1, CD300A, MRC1, FCGR2B, TGFBR2, CXCL16	628	60	18082	3.35918	1	0.189119	0.178907
GOTERM_BP_DIRECT	GO:0090200	positive regulation of release of cytochrome c from mitochondria	0.70028	0.0191868	TNFSF10, PLAUR, PMAIP1, FAS, BID	628	30	18082	4.79883	1	0.206697	0.195537
GOTERM_BP_DIRECT	GO:0032570	response to progesterone	0.70028	0.0191868	TGFB1, NR1H3, CCL2, CD38, TLR2	628	30	18082	4.79883	1	0.206697	0.195537
GOTERM_BP_DIRECT	GO:0050732	negative regulation of peptidyl-tyrosine phosphorylation	0.560224	0.0196317	PTPRC, LRRK1, SH2D1B1, SAMSN1	628	17	18082	6.77482	1	0.209818	0.198489
GOTERM_BP_DIRECT	GO:0050870	positive regulation of T cell activation	0.560224	0.0196317	CD4, CCL2, CORO1A, CARD11	628	17	18082	6.77482	1	0.209818	0.198489
GOTERM_BP_DIRECT	GO:0001525	angiogenesis	2.2409	0.0199203	ACVRL1, CCL12, NRP2, SYK, PLXND1, TNFRSF12A, MMP2, TNFAIP2, PTGS2, SAT1, PIK3R6, MMP14, CCL2, TGFBI, THSD7A, MFGE8	628	239	18082	1.92756	1	0.212064	0.200614
GOTERM_BP_DIRECT	GO:0008217	regulation of blood pressure	0.980392	0.0201897	ACVRL1, CYP4F18, ERAP1, C3AR1, CYBA, PTGS2, PTGS1	628	62	18082	3.25082	1	0.21409	0.20253
GOTERM_BP_DIRECT	GO:0019722	calcium-mediated signaling	0.840336	0.0209623	LAT2, LRRK2, CCL3, CXCR4, CCR6, CCR5	628	46	18082	3.75561	1	0.221414	0.209459
GOTERM_BP_DIRECT	GO:0043552	positive regulation of phosphatidylinositol 3-kinase activity	0.70028	0.0214413	LYN, FGR, TGFB1, PDGFB, NOD2	628	31	18082	4.64403	1	0.225593	0.213412
GOTERM_BP_DIRECT	GO:0019441	tryptophan catabolic process to kynurenine	0.420168	0.0224524	KYNU, IDO2, IDO1	628	7	18082	12.3399	1	0.231722	0.219211
GOTERM_BP_DIRECT	GO:0002830	positive regulation of type 2 immune response	0.420168	0.0224524	CD74, NOD2, IDO1	628	7	18082	12.3399	1	0.231722	0.219211
GOTERM_BP_DIRECT	GO:0002467	germinal center formation	0.420168	0.0224524	KLHL6, BCL3, NFKB2	628	7	18082	12.3399	1	0.231722	0.219211
GOTERM_BP_DIRECT	GO:0045359	positive regulation of interferon-beta biosynthetic process	0.420168	0.0224524	TLR8, TLR7, TLR3	628	7	18082	12.3399	1	0.231722	0.219211
GOTERM_BP_DIRECT	GO:0050861	positive regulation of B cell receptor signaling pathway	0.420168	0.0224524	LYN, CMTM3, NFAM1	628	7	18082	12.3399	1	0.231722	0.219211
GOTERM_BP_DIRECT	GO:0051770	positive regulation of nitric-oxide synthase biosynthetic process	0.560224	0.0229635	STAT1, CCL2, NOD2, TLR2	628	18	18082	6.39844	1	0.234314	0.221663
GOTERM_BP_DIRECT	GO:0043032	positive regulation of macrophage activation	0.560224	0.0229635	IFI204, IL4RA, LGALS9, HAVCR2	628	18	18082	6.39844	1	0.234314	0.221663
GOTERM_BP_DIRECT	GO:0043277	apoptotic cell clearance	0.560224	0.0229635	AXL, NR1H3, MERTK, TGM2	628	18	18082	6.39844	1	0.234314	0.221663
GOTERM_BP_DIRECT	GO:0045071	negative regulation of viral genome replication	0.70028	0.0238513	BST2, TRIM6, RSAD2, CCL5, ISG15	628	32	18082	4.49891	1	0.242459	0.229367
GOTERM_BP_DIRECT	GO:0032355	response to estradiol	1.2605	0.0241207	FCGR1, CD4, ANXA1, TGFB1, IFI27, CD38, PTGS2, BID, PAM	628	101	18082	2.56571	1	0.244279	0.231089
GOTERM_BP_DIRECT	GO:1901741	positive regulation of myoblast fusion	0.560224	0.0265824	CD53, CXCL9, CCL8, IL4RA	628	19	18082	6.06168	1	0.266464	0.252077
GOTERM_BP_DIRECT	GO:2000045	regulation of G1/S transition of mitotic cell cycle	0.560224	0.0265824	PSME2B, PSME1, PSME2, BID	628	19	18082	6.06168	1	0.266464	0.252077
GOTERM_BP_DIRECT	GO:0032088	negative regulation of NF-kappaB transcription factor activity	0.980392	0.026607	NLRC5, TNFAIP3, NOD2, KLF4, TRIM21, HAVCR2, CMKLR1	628	66	18082	3.0538	1	0.266464	0.252077
GOTERM_BP_DIRECT	GO:0008285	negative regulation of cell proliferation	3.08123	0.0272922	LYN, TGIF1, ACVRL1, CSF1R, CDKN1A, TGFB1, SLFN2, CAV2, WNT9A, KLF4, PTGS2, TSPAN32, IFIT3, TGFBR2, IL1A, BMP2, ADORA2B, IRF1, INPP5D, IL1B, CD37, TLR2	628	384	18082	1.6496	1	0.272318	0.257614
GOTERM_BP_DIRECT	GO:0001938	positive regulation of endothelial cell proliferation	0.980392	0.0283999	ACVRL1, CCL24, BMP2, CAV2, PDGFB, CCL2, CYBA	628	67	18082	3.00822	1	0.278557	0.263517
GOTERM_BP_DIRECT	GO:0050900	leukocyte migration	0.70028	0.0291456	IL1B, MSN, FPR2, AMICA1, ICAM1	628	34	18082	4.23426	1	0.278557	0.263517
GOTERM_BP_DIRECT	GO:0043304	regulation of mast cell degranulation	0.420168	0.0292567	LYN, FES, RAC2	628	8	18082	10.7974	1	0.278557	0.263517
GOTERM_BP_DIRECT	GO:0032725	positive regulation of granulocyte macrophage colony-stimulating factor production	0.420168	0.0292567	DDX58, IL1B, IL12B	628	8	18082	10.7974	1	0.278557	0.263517
GOTERM_BP_DIRECT	GO:0006569	tryptophan catabolic process	0.420168	0.0292567	KYNU, IDO2, IDO1	628	8	18082	10.7974	1	0.278557	0.263517
GOTERM_BP_DIRECT	GO:0002489	antigen processing and presentation of endogenous peptide antigen via MHC class Ib via ER pathway, TAP-dependent	0.420168	0.0292567	H2-T23, TAP2, TAP1	628	8	18082	10.7974	1	0.278557	0.263517
GOTERM_BP_DIRECT	GO:0015833	peptide transport	0.420168	0.0292567	TAP2, TAP1, SLC15A3	628	8	18082	10.7974	1	0.278557	0.263517
GOTERM_BP_DIRECT	GO:2000107	negative regulation of leukocyte apoptotic process	0.420168	0.0292567	HCLS1, CCR7, MERTK	628	8	18082	10.7974	1	0.278557	0.263517
GOTERM_BP_DIRECT	GO:0051353	positive regulation of oxidoreductase activity	0.420168	0.0292567	RIPK3, NOD2, LGALS9	628	8	18082	10.7974	1	0.278557	0.263517
GOTERM_BP_DIRECT	GO:0045646	regulation of erythrocyte differentiation	0.420168	0.0292567	LYN, SPI1, B2M	628	8	18082	10.7974	1	0.278557	0.263517
GOTERM_BP_DIRECT	GO:0002821	positive regulation of adaptive immune response	0.420168	0.0292567	SASH3, CD74, CD44	628	8	18082	10.7974	1	0.278557	0.263517
GOTERM_BP_DIRECT	GO:0045591	positive regulation of regulatory T cell differentiation	0.420168	0.0292567	TGFB1, H2-M3, LGALS9	628	8	18082	10.7974	1	0.278557	0.263517
GOTERM_BP_DIRECT	GO:0001812	positive regulation of type I hypersensitivity	0.420168	0.0292567	FCGR3, FCER1G, BTK	628	8	18082	10.7974	1	0.278557	0.263517
GOTERM_BP_DIRECT	GO:0044130	negative regulation of growth of symbiont in host	0.560224	0.0304872	IL12B, IRF8, NOD2, TLR2	628	20	18082	5.7586	1	0.289254	0.273636
GOTERM_BP_DIRECT	GO:0045786	negative regulation of cell cycle	0.70028	0.0350822	PLA2G16, BMP2, TGFB1, PTGS2, RUNX3	628	36	18082	3.99903	1	0.331686	0.313777
GOTERM_BP_DIRECT	GO:0009968	negative regulation of signal transduction	0.840336	0.0360977	RGS19, SOCS1, RGS14, RGS1, INPP5D, RGS10	628	53	18082	3.25958	1	0.335846	0.317713
GOTERM_BP_DIRECT	GO:0034115	negative regulation of heterotypic cell-cell adhesion	0.420168	0.0367642	IL1RN, TNFAIP3, KLF4	628	9	18082	9.59766	1	0.335846	0.317713
GOTERM_BP_DIRECT	GO:0002639	positive regulation of immunoglobulin production	0.420168	0.0367642	SASH3, IL4RA, CD37	628	9	18082	9.59766	1	0.335846	0.317713
GOTERM_BP_DIRECT	GO:0035456	response to interferon-beta	0.420168	0.0367642	BST2, STAT1, XAF1	628	9	18082	9.59766	1	0.335846	0.317713
GOTERM_BP_DIRECT	GO:0030816	positive regulation of cAMP metabolic process	0.420168	0.0367642	CXCL10, CXCL9, PF4	628	9	18082	9.59766	1	0.335846	0.317713
GOTERM_BP_DIRECT	GO:0050665	hydrogen peroxide biosynthetic process	0.420168	0.0367642	NCF1, CYBB, CYBA	628	9	18082	9.59766	1	0.335846	0.317713
GOTERM_BP_DIRECT	GO:0042088	T-helper 1 type immune response	0.420168	0.0367642	BCL3, TLR6, IL18BP	628	9	18082	9.59766	1	0.335846	0.317713
GOTERM_BP_DIRECT	GO:0050764	regulation of phagocytosis	0.420168	0.0367642	FGR, HCK, SYK	628	9	18082	9.59766	1	0.335846	0.317713
GOTERM_BP_DIRECT	GO:0071639	positive regulation of monocyte chemotactic protein-1 production	0.420168	0.0367642	IL1A, IL1B, NOD2	628	9	18082	9.59766	1	0.335846	0.317713
GOTERM_BP_DIRECT	GO:0032308	positive regulation of prostaglandin secretion	0.420168	0.0367642	P2RX7, IL1A, IL1B	628	9	18082	9.59766	1	0.335846	0.317713
GOTERM_BP_DIRECT	GO:0008630	intrinsic apoptotic signaling pathway in response to DNA damage	0.840336	0.0386912	PMAIP1, SFN, BCL2A1D, TNFRSF1B, BCL2A1A, BCL2A1B	628	54	18082	3.19922	1	0.352259	0.333239
GOTERM_BP_DIRECT	GO:1902895	positive regulation of pri-miRNA transcription from RNA polymerase II promoter	0.560224	0.0391459	BMP2, SPI1, TGFB1, PDGFB	628	22	18082	5.23509	1	0.354015	0.3349
GOTERM_BP_DIRECT	GO:0045671	negative regulation of osteoclast differentiation	0.560224	0.0391459	PILRB1, INPP5D, CCL3, FBN1	628	22	18082	5.23509	1	0.354015	0.3349
GOTERM_BP_DIRECT	GO:0035556	intracellular signal transduction	3.08123	0.0402754	LYN, SIRPB1A, SYK, RGS14, LRRK2, NFAM1, PLEK, NOD2, ADCY7, VAV1, LAT2, DOK1, SOCS1, INPP5D, BLNK, BTK, PLCG2, LCP2, ASB2, PLCB2, DGKI, ARHGEF6	628	400	18082	1.58361	1	0.363015	0.343415
GOTERM_BP_DIRECT	GO:0010629	negative regulation of gene expression	2.2409	0.0437732	CCR1, TGIF1, ACVRL1, CDKN1A, TGFB1, NOS2, PDGFB, PTPN22, KLF4, AIF1, TRIM6, BMP2, IL1B, CCL3, LGALS9, HAVCR2	628	265	18082	1.73844	1	0.393232	0.371999
GOTERM_BP_DIRECT	GO:0045785	positive regulation of cell adhesion	0.840336	0.0442113	APBB1IP, CCL5, IL12B, CCL2, VAV1, TGM2	628	56	18082	3.08496	1	0.395852	0.374479
GOTERM_BP_DIRECT	GO:0071404	cellular response to low-density lipoprotein particle stimulus	0.420168	0.0449181	FCER1G, SYK, ITGB2	628	10	18082	8.6379	1	0.396923	0.375492
GOTERM_BP_DIRECT	GO:0046007	negative regulation of activated T cell proliferation	0.420168	0.0449181	CD274, PDCD1LG2, IDO1	628	10	18082	8.6379	1	0.396923	0.375492
GOTERM_BP_DIRECT	GO:0006957	complement activation, alternative pathway	0.420168	0.0449181	C3, CFP, CFB	628	10	18082	8.6379	1	0.396923	0.375492
GOTERM_BP_DIRECT	GO:0034116	positive regulation of heterotypic cell-cell adhesion	0.420168	0.0449181	FGB, IL1B, CD44	628	10	18082	8.6379	1	0.396923	0.375492
GOTERM_BP_DIRECT	GO:0035690	cellular response to drug	0.980392	0.0456235	NOS2, IL1B, CCL4, SLAMF8, CCL2, CD69, TLR3	628	75	18082	2.68735	1	0.400539	0.378912
GOTERM_BP_DIRECT	GO:0007179	transforming growth factor beta receptor signaling pathway	0.980392	0.0456235	ACVRL1, BMP2, TGFB1, ZYX, PDGFB, CCL2, TGFBR2	628	75	18082	2.68735	1	0.400539	0.378912
GOTERM_BP_DIRECT	GO:0000187	activation of MAPK activity	0.980392	0.0481484	P2RX7, CD74, BMP2, PTPRC, SYK, IL1B, LRRK2	628	76	18082	2.65199	1	0.421338	0.398588
GOTERM_BP_DIRECT	GO:0042104	positive regulation of activated T cell proliferation	0.560224	0.0489122	CD86, IL12B, ICOSL, IL12RB1	628	24	18082	4.79883	1	0.425269	0.402307
GOTERM_BP_DIRECT	GO:0030574	collagen catabolic process	0.560224	0.0489122	MMP14, MMP2, CTSS, CTSB	628	24	18082	4.79883	1	0.425269	0.402307
GOTERM_BP_DIRECT	GO:0010466	negative regulation of peptidase activity	1.2605	0.0508125	SERPINA3F, SERPINA10, SERPING1, SERPINA3M, TIMP1, SERPINA3N, CST7, SERPINA3G, SERPINB8	628	117	18082	2.21485	1	0.440375	0.416597
GOTERM_BP_DIRECT	GO:0006508	proteolysis	4.06162	0.0515446	ADAMDEC1, CTSZ, HTRA4, HTRA1, TNFAIP3, PSMB10, CTSS, CASP7, MMP25, CASP4, C1RL, CASP1, CTSH, GM2663, AMZ1, CTSC, CTSB, C1RB, NAPSA, C1RA, F10, MMP2, ERAP1, RHBDF2, PSMB8, PSMB9, ADAM19, MMP14, CFB	628	582	18082	1.4347	1	0.445293	0.42125
GOTERM_BP_DIRECT	GO:0060068	vagina development	0.420168	0.0536646	RBP4, AXL, MERTK	628	11	18082	7.85263	1	0.44545	0.421399
GOTERM_BP_DIRECT	GO:0045577	regulation of B cell differentiation	0.420168	0.0536646	PTPRC, NFAM1, CARD11	628	11	18082	7.85263	1	0.44545	0.421399
GOTERM_BP_DIRECT	GO:0021785	branchiomotor neuron axon guidance	0.420168	0.0536646	NRP2, PLXND1, PLXNC1	628	11	18082	7.85263	1	0.44545	0.421399
GOTERM_BP_DIRECT	GO:0032691	negative regulation of interleukin-1 beta production	0.420168	0.0536646	ACP5, TNFAIP3, MEFV	628	11	18082	7.85263	1	0.44545	0.421399
GOTERM_BP_DIRECT	GO:0046641	positive regulation of alpha-beta T cell proliferation	0.420168	0.0536646	PTPRC, SYK, CD80	628	11	18082	7.85263	1	0.44545	0.421399
GOTERM_BP_DIRECT	GO:0050777	negative regulation of immune response	0.420168	0.0536646	TGFB1, INPP5D, FCGR2B	628	11	18082	7.85263	1	0.44545	0.421399
GOTERM_BP_DIRECT	GO:0002281	macrophage activation involved in immune response	0.420168	0.0536646	TYROBP, SYK, HAVCR2	628	11	18082	7.85263	1	0.44545	0.421399
GOTERM_BP_DIRECT	GO:0032727	positive regulation of interferon-alpha production	0.420168	0.0536646	IFIH1, DDX58, IRF7	628	11	18082	7.85263	1	0.44545	0.421399
GOTERM_BP_DIRECT	GO:0030101	natural killer cell activation	0.420168	0.0536646	ITGB2, IL12B, IL18R1	628	11	18082	7.85263	1	0.44545	0.421399
GOTERM_BP_DIRECT	GO:0034145	positive regulation of toll-like receptor 4 signaling pathway	0.420168	0.0536646	TICAM2, NR1H3, PTPN22	628	11	18082	7.85263	1	0.44545	0.421399
GOTERM_BP_DIRECT	GO:0032825	positive regulation of natural killer cell differentiation	0.420168	0.0536646	IL15RA, AXL, IRF1	628	11	18082	7.85263	1	0.44545	0.421399
GOTERM_BP_DIRECT	GO:0019835	cytolysis	0.560224	0.0541987	P2RX7, GSDMD, LYZ2, FGL2	628	25	18082	4.60688	1	0.44545	0.421399
GOTERM_BP_DIRECT	GO:0034612	response to tumor necrosis factor	0.560224	0.0541987	CCL5, UBD, PTGS2, CXCL16	628	25	18082	4.60688	1	0.44545	0.421399
GOTERM_BP_DIRECT	GO:1902042	negative regulation of extrinsic apoptotic signaling pathway via death domain receptors	0.560224	0.0541987	FGB, TNFAIP3, TNFRSF23, ICAM1	628	25	18082	4.60688	1	0.44545	0.421399
GOTERM_BP_DIRECT	GO:0045453	bone resorption	0.560224	0.0541987	LRRK1, RAC2, ACP5, CTSS	628	25	18082	4.60688	1	0.44545	0.421399
GOTERM_BP_DIRECT	GO:0001816	cytokine production	0.560224	0.0541987	CD4, MAF, PTAFR, BATF	628	25	18082	4.60688	1	0.44545	0.421399
GOTERM_BP_DIRECT	GO:0007200	phospholipase C-activating G-protein coupled receptor signaling pathway	0.840336	0.0565969	GNA15, C5AR1, C3AR1, FPR2, GNG13, TGM2	628	60	18082	2.8793	1	0.463751	0.438711
GOTERM_BP_DIRECT	GO:0014070	response to organic cyclic compound	0.980392	0.0590974	P2RX7, LYN, MMP14, CD83, NCF2, CASP1, ICAM1	628	80	18082	2.51939	1	0.482777	0.45671
GOTERM_BP_DIRECT	GO:0050727	regulation of inflammatory response	0.840336	0.0599745	LYN, ANXA1, CASP4, ZYX, CASP1, NOD2	628	61	18082	2.8321	1	0.488467	0.462093
GOTERM_BP_DIRECT	GO:0097067	cellular response to thyroid hormone stimulus	0.420168	0.062953	CTSH, CTSS, CTSB	628	12	18082	7.19825	1	0.49484	0.468122
GOTERM_BP_DIRECT	GO:0002430	complement receptor mediated signaling pathway	0.420168	0.062953	C5AR1, C3AR1, FPR2	628	12	18082	7.19825	1	0.49484	0.468122
GOTERM_BP_DIRECT	GO:0097028	dendritic cell differentiation	0.420168	0.062953	LYN, BATF3, AXL	628	12	18082	7.19825	1	0.49484	0.468122
GOTERM_BP_DIRECT	GO:0032930	positive regulation of superoxide anion generation	0.420168	0.062953	TGFB1, CYBA, CXCL1	628	12	18082	7.19825	1	0.49484	0.468122
GOTERM_BP_DIRECT	GO:0016045	detection of bacterium	0.420168	0.062953	NAIP6, NOD2, PGLYRP1	628	12	18082	7.19825	1	0.49484	0.468122
GOTERM_BP_DIRECT	GO:0043922	negative regulation by host of viral transcription	0.420168	0.062953	CCL5, CCL4, CCL3	628	12	18082	7.19825	1	0.49484	0.468122
GOTERM_BP_DIRECT	GO:0048711	positive regulation of astrocyte differentiation	0.420168	0.062953	MAG, BMP2, IL1B	628	12	18082	7.19825	1	0.49484	0.468122
GOTERM_BP_DIRECT	GO:1900017	positive regulation of cytokine production involved in inflammatory response	0.420168	0.062953	GBP5, NOD2, GPSM3	628	12	18082	7.19825	1	0.49484	0.468122
GOTERM_BP_DIRECT	GO:0045086	positive regulation of interleukin-2 biosynthetic process	0.420168	0.062953	IL1A, IL1B, CARD11	628	12	18082	7.19825	1	0.49484	0.468122
GOTERM_BP_DIRECT	GO:0008015	blood circulation	0.420168	0.062953	ACVRL1, STAT1, FLI1	628	12	18082	7.19825	1	0.49484	0.468122
GOTERM_BP_DIRECT	GO:0043950	positive regulation of cAMP-mediated signaling	0.420168	0.062953	CXCL10, CXCL9, PF4	628	12	18082	7.19825	1	0.49484	0.468122
GOTERM_BP_DIRECT	GO:0035455	response to interferon-alpha	0.420168	0.062953	BST2, TGTP2, TGTP1	628	12	18082	7.19825	1	0.49484	0.468122
GOTERM_BP_DIRECT	GO:0009612	response to mechanical stimulus	0.840336	0.0670662	P2RX7, MMP14, STAT1, MMP2, CCL2, TGFBR2	628	63	18082	2.74219	1	0.508958	0.481477
GOTERM_BP_DIRECT	GO:0042496	detection of diacyl bacterial lipopeptide	0.280112	0.0681502	TLR6, TLR2	628	2	18082	28.793	1	0.508958	0.481477
GOTERM_BP_DIRECT	GO:0002268	follicular dendritic cell differentiation	0.280112	0.0681502	BCL3, NFKB2	628	2	18082	28.793	1	0.508958	0.481477
GOTERM_BP_DIRECT	GO:0002518	lymphocyte chemotaxis across high endothelial venule	0.280112	0.0681502	CCR7, CXCL13	628	2	18082	28.793	1	0.508958	0.481477
GOTERM_BP_DIRECT	GO:0002764	immune response-regulating signaling pathway	0.280112	0.0681502	LAT2, CTSH	628	2	18082	28.793	1	0.508958	0.481477
GOTERM_BP_DIRECT	GO:0019060	intracellular transport of viral protein in host cell	0.280112	0.0681502	TAP2, TAP1	628	2	18082	28.793	1	0.508958	0.481477
GOTERM_BP_DIRECT	GO:0070230	positive regulation of lymphocyte apoptotic process	0.280112	0.0681502	P2RX7, FAS	628	2	18082	28.793	1	0.508958	0.481477
GOTERM_BP_DIRECT	GO:0032687	negative regulation of interferon-alpha production	0.280112	0.0681502	GBP4, HAVCR2	628	2	18082	28.793	1	0.508958	0.481477
GOTERM_BP_DIRECT	GO:0010819	regulation of T cell chemotaxis	0.280112	0.0681502	CXCL10, LGALS9	628	2	18082	28.793	1	0.508958	0.481477
GOTERM_BP_DIRECT	GO:0046967	cytosol to ER transport	0.280112	0.0681502	TAP2, TAP1	628	2	18082	28.793	1	0.508958	0.481477
GOTERM_BP_DIRECT	GO:0042495	detection of triacyl bacterial lipopeptide	0.280112	0.0681502	TLR1, TLR2	628	2	18082	28.793	1	0.508958	0.481477
GOTERM_BP_DIRECT	GO:2000521	negative regulation of immunological synapse formation	0.280112	0.0681502	LGALS3, HAVCR2	628	2	18082	28.793	1	0.508958	0.481477
GOTERM_BP_DIRECT	GO:0002431	Fc receptor mediated stimulatory signaling pathway	0.280112	0.0681502	LYN, FCER1G	628	2	18082	28.793	1	0.508958	0.481477
GOTERM_BP_DIRECT	GO:0034124	regulation of MyD88-dependent toll-like receptor signaling pathway	0.280112	0.0681502	IRF1, IRF7	628	2	18082	28.793	1	0.508958	0.481477
GOTERM_BP_DIRECT	GO:0034157	positive regulation of toll-like receptor 7 signaling pathway	0.280112	0.0681502	RSAD2, PTPN22	628	2	18082	28.793	1	0.508958	0.481477
GOTERM_BP_DIRECT	GO:2001189	negative regulation of T cell activation via T cell receptor contact with antigen bound to MHC molecule on antigen presenting cell	0.280112	0.0681502	LGALS3, HAVCR2	628	2	18082	28.793	1	0.508958	0.481477
GOTERM_BP_DIRECT	GO:0002717	positive regulation of natural killer cell mediated immunity	0.280112	0.0681502	H2-T23, SH2D1B1	628	2	18082	28.793	1	0.508958	0.481477
GOTERM_BP_DIRECT	GO:0007613	memory	0.980392	0.0682066	CX3CR1, IL1RN, HRH2, IL1B, CASP1, PTGS2, PTGS1	628	83	18082	2.42832	1	0.508958	0.481477
GOTERM_BP_DIRECT	GO:0007264	small GTPase mediated signal transduction	1.96078	0.0683254	ARL11, RRAD, LRRK2, LRRK1, RHOH, GEM, VAV1, RAB32, RAB30, ARL5C, ARHGAP30, RAC2, RAB38, DOCK2	628	236	18082	1.70806	1	0.508958	0.481477
GOTERM_BP_DIRECT	GO:0010977	negative regulation of neuron projection development	0.840336	0.0707794	IL15RA, MAG, H2-K1, VIM, B2M, H2-D1	628	64	18082	2.69934	1	0.52435	0.496038
GOTERM_BP_DIRECT	GO:0071363	cellular response to growth factor stimulus	0.840336	0.0707794	TGIF1, BMP2, TGFB1, PDGFB, TNFRSF1B, KLF4	628	64	18082	2.69934	1	0.52435	0.496038
GOTERM_BP_DIRECT	GO:0007596	blood coagulation	0.980392	0.0714141	FGB, C3, F10, SERPINA10, PDGFB, SERPING1, TSPAN32	628	84	18082	2.39942	1	0.52447	0.496152
GOTERM_BP_DIRECT	GO:0045765	regulation of angiogenesis	0.560224	0.0715982	SP100, PLXND1, TNFRSF12A, ADORA2B	628	28	18082	4.11328	1	0.52447	0.496152
GOTERM_BP_DIRECT	GO:0043129	surfactant homeostasis	0.420168	0.0727353	NAPSA, CTSH, PLA2G4A	628	13	18082	6.64454	1	0.52447	0.496152
GOTERM_BP_DIRECT	GO:0070266	necroptotic process	0.420168	0.0727353	RIPK3, MLKL, BIRC3	628	13	18082	6.64454	1	0.52447	0.496152
GOTERM_BP_DIRECT	GO:0071803	positive regulation of podosome assembly	0.420168	0.0727353	FSCN1, MSN, LCP1	628	13	18082	6.64454	1	0.52447	0.496152
GOTERM_BP_DIRECT	GO:1902287	semaphorin-plexin signaling pathway involved in axon guidance	0.420168	0.0727353	NRP2, PLXND1, PLXNC1	628	13	18082	6.64454	1	0.52447	0.496152
GOTERM_BP_DIRECT	GO:0001913	T cell mediated cytotoxicity	0.420168	0.0727353	CTSH, CTSC, STX11	628	13	18082	6.64454	1	0.52447	0.496152
GOTERM_BP_DIRECT	GO:0060389	pathway-restricted SMAD protein phosphorylation	0.420168	0.0727353	BMP2, TGFB1, TGFBR2	628	13	18082	6.64454	1	0.52447	0.496152
GOTERM_BP_DIRECT	GO:0060397	JAK-STAT cascade involved in growth hormone signaling pathway	0.420168	0.0727353	LYN, SOCS1, STAT1	628	13	18082	6.64454	1	0.52447	0.496152
GOTERM_BP_DIRECT	GO:0033690	positive regulation of osteoblast proliferation	0.420168	0.0727353	BMP2, TMEM119, HPSE	628	13	18082	6.64454	1	0.52447	0.496152
GOTERM_BP_DIRECT	GO:0002062	chondrocyte differentiation	0.70028	0.0744585	BMP2, TGFB1, ARID5A, TGFBI, RUNX3	628	46	18082	3.12967	1	0.534047	0.505212
GOTERM_BP_DIRECT	GO:0007599	hemostasis	0.70028	0.0744585	FGB, F10, SERPINA10, SERPING1, TSPAN32	628	46	18082	3.12967	1	0.534047	0.505212
GOTERM_BP_DIRECT	GO:0030216	keratinocyte differentiation	0.980392	0.074707	TGM1, ANXA1, CRCT1, SFN, PTGS2, SPRR1A, PTGS1	628	85	18082	2.37119	1	0.534412	0.505557
GOTERM_BP_DIRECT	GO:0030336	negative regulation of cell migration	1.12045	0.0755209	ACVRL1, CX3CR1, CNN2, BST2, IL1RN, PDGFB, CCR5, KLF4	628	106	18082	2.17306	1	0.538808	0.509716
GOTERM_BP_DIRECT	GO:0031214	biomineral tissue development	0.560224	0.0778882	SRGN, BGLAP3, TMEM119, SPP1	628	29	18082	3.97145	1	0.552727	0.522883
GOTERM_BP_DIRECT	GO:0009636	response to toxic substance	0.980392	0.0780849	LYN, CDKN1A, CCL5, CCL4, CCL3, FAS, TLR2	628	86	18082	2.34362	1	0.552727	0.522883
GOTERM_BP_DIRECT	GO:0030097	hemopoiesis	0.980392	0.0780849	LYN, CNN2, CSF1R, MYO1E, MELK, IKZF1, RUNX3	628	86	18082	2.34362	1	0.552727	0.522883
GOTERM_BP_DIRECT	GO:0006461	protein complex assembly	0.840336	0.0785376	CD74, H2-DMA, TAP2, TSPAN4, NCKAP1L, PF4	628	66	18082	2.61754	1	0.55448	0.524541
GOTERM_BP_DIRECT	GO:0043154	negative regulation of cysteine-type endopeptidase activity involved in apoptotic process	0.840336	0.082581	SFN, WNT9A, BCL2A1D, IFI202B, KLF4, CD44	628	67	18082	2.57848	1	0.573762	0.542782
GOTERM_BP_DIRECT	GO:0032743	positive regulation of interleukin-2 production	0.420168	0.0829663	SASH3, ANXA1, CD83	628	14	18082	6.16993	1	0.573762	0.542782
GOTERM_BP_DIRECT	GO:0001817	regulation of cytokine production	0.420168	0.0829663	LYN, TICAM2, LITAF	628	14	18082	6.16993	1	0.573762	0.542782
GOTERM_BP_DIRECT	GO:0001775	cell activation	0.420168	0.0829663	TGFB1, CCL3, TIMP1	628	14	18082	6.16993	1	0.573762	0.542782
GOTERM_BP_DIRECT	GO:0050765	negative regulation of phagocytosis	0.420168	0.0829663	CNN2, TGFB1, FCGR2B	628	14	18082	6.16993	1	0.573762	0.542782
GOTERM_BP_DIRECT	GO:0032703	negative regulation of interleukin-2 production	0.420168	0.0829663	TNFAIP3, NOD2, HAVCR2	628	14	18082	6.16993	1	0.573762	0.542782
GOTERM_BP_DIRECT	GO:0051279	regulation of release of sequestered calcium ion into cytosol	0.420168	0.0829663	LYN, CYBA, CORO1A	628	14	18082	6.16993	1	0.573762	0.542782
GOTERM_BP_DIRECT	GO:0050709	negative regulation of protein secretion	0.420168	0.0829663	ANXA1, RSAD2, RHBDF2	628	14	18082	6.16993	1	0.573762	0.542782
GOTERM_BP_DIRECT	GO:0010942	positive regulation of cell death	0.70028	0.0842178	CDKN1A, IL1B, IRF1, FAS, PTGS2	628	48	18082	2.99927	1	0.577838	0.546638
GOTERM_BP_DIRECT	GO:0009725	response to hormone	0.70028	0.0842178	LYN, MMP14, HCLS1, CD38, TIMP1	628	48	18082	2.99927	1	0.577838	0.546638
GOTERM_BP_DIRECT	GO:0032715	negative regulation of interleukin-6 production	0.560224	0.0844106	TRIM30A, TNFAIP3, NCKAP1L, HAVCR2	628	30	18082	3.83907	1	0.577838	0.546638
GOTERM_BP_DIRECT	GO:0051928	positive regulation of calcium ion transport	0.560224	0.0844106	CCR1, CCL5, CCL4, CCL3	628	30	18082	3.83907	1	0.577838	0.546638
GOTERM_BP_DIRECT	GO:0045600	positive regulation of fat cell differentiation	0.70028	0.0893204	TPH1, BMP2, SH3PXD2B, DKKL1, CMKLR1	628	49	18082	2.93806	1	0.609905	0.576974
GOTERM_BP_DIRECT	GO:0051482	positive regulation of cytosolic calcium ion concentration involved in phospholipase C-activating G-protein coupled signaling pathway	0.560224	0.0911573	GPR35, GPR65, GPR18, TGM2	628	31	18082	3.71522	1	0.61932	0.58588
GOTERM_BP_DIRECT	GO:2000379	positive regulation of reactive oxygen species metabolic process	0.560224	0.0911573	CDKN1A, RIPK3, PDGFB, TGFBR2	628	31	18082	3.71522	1	0.61932	0.58588
GOTERM_BP_DIRECT	GO:0010820	positive regulation of T cell chemotaxis	0.420168	0.0936031	CCL5, CCR7, CXCL13	628	15	18082	5.7586	1	0.621648	0.588083
GOTERM_BP_DIRECT	GO:0006693	prostaglandin metabolic process	0.420168	0.0936031	TBXAS1, PTGS2, PTGS1	628	15	18082	5.7586	1	0.621648	0.588083
GOTERM_BP_DIRECT	GO:0043330	response to exogenous dsRNA	0.70028	0.0945679	DDX58, STAT1, RFTN1, NOD2, TLR3	628	50	18082	2.8793	1	0.621648	0.588083
GOTERM_BP_DIRECT	GO:0042157	lipoprotein metabolic process	0.560224	0.0981199	APOL10B, APOL9B, APOL11B, APOL9A	628	32	18082	3.59912	1	0.621648	0.588083
GOTERM_BP_DIRECT	GO:0097190	apoptotic signaling pathway	0.70028	0.0999575	SPN, CD40, DAPL1, FAS, TNFRSF14	628	51	18082	2.82284	1	0.621648	0.588083

## Sheet: UP_BP_T2D_vs_Healthy
#Upregulated GO enrichemnt in T2D vs Healthy Adult Group
#Biological Process
Category	ID	Term	%	PValue	Genes	List Total	Pop Hits	Pop Total	Fold Enrichment	Bonferroni	Benjamini	FDR
GOTERM_BP_DIRECT	GO:0002376	immune system process	7.47423	5.68709e-10	C1QB, CSF1R, CLEC4A2, CLEC4N, LGALS3, ALCAM, INPP5D, H2-DMB1, CLEC5A, C1RL, CD300LB, SLAMF7, CD300LD, HAVCR2, LYN, CD74, LY86, H2-AA, LAT2, HCK, AXL, TLR8, IRF5, SH2D1B1, TLR5, TNFRSF21, TLR13, C1QC, H2-AB1	333	383	18082	4.11151	1.10159e-06	1.10159e-06	1.08794e-06
GOTERM_BP_DIRECT	GO:0006954	inflammatory response	6.95876	1.1871e-09	CSF1R, C5AR1, REG3G, PLA2G7, CCL9, CCL6, STAB1, C3AR1, CCR5, HAVCR2, CCR2, LYN, TGFB1, SLC11A1, LY86, CYBB, CYBA, TNFRSF1B, IL1A, HCK, BMP2, AXL, TLR8, ADAM8, TLR5, TNFRSF21, TLR13	333	344	18082	4.26194	2.29941e-06	1.14971e-06	1.13546e-06
GOTERM_BP_DIRECT	GO:0070374	positive regulation of ERK1 and ERK2 cascade	4.12371	2.1122e-06	CSF1R, CD74, TGFB1, ALOX15, C5AR1, PDGFB, TREM2, MT3, IL1A, CCL9, BMP2, GPNMB, CCL6, CD36, CD44, HAVCR2	333	188	18082	4.6213	0.00408298	0.00136378	0.00134688
GOTERM_BP_DIRECT	GO:0045087	innate immune response	5.92784	5.15186e-06	C1QB, LYN, CSF1R, CLEC4A2, CLEC4N, LY86, CYBB, CYBA, TREM2, LGALS3, HCK, TYROBP, AXL, CLEC5A, C1RL, SLAMF7, TLR8, IRF5, SH2D1B1, TLR5, C1QC, TLR13, HAVCR2	333	400	18082	3.12227	0.00992955	0.00249479	0.00246388
GOTERM_BP_DIRECT	GO:0050731	positive regulation of peptidyl-tyrosine phosphorylation	2.83505	1.66575e-05	LYN, CD74, TGFB1, CAV2, PDGFB, HCLS1, CCK, TREM2, SH2D1B1, CD36, CD44	333	101	18082	5.91389	0.0317509	0.00645312	0.00637317
GOTERM_BP_DIRECT	GO:0048002	antigen processing and presentation of peptide antigen	1.03093	2.4205e-05	SLC11A1, H2-AA, CTSS, H2-AB1	333	4	18082	54.3003	0.0458034	0.00672636	0.00664301
GOTERM_BP_DIRECT	GO:0030335	positive regulation of cell migration	3.86598	2.43079e-05	LYN, CSF1R, TGFB1, PDGFB, CXCR4, RHOD, CXCL16, DAB2, BMP2, GPNMB, PLAU, C3AR1, CTSH, MYO1F, FERMT3	333	203	18082	4.01234	0.0459938	0.00672636	0.00664301
GOTERM_BP_DIRECT	GO:0030593	neutrophil chemotaxis	2.31959	3.74768e-05	VAV3, LGALS3, FCGR3, CCL9, ITGAM, CCL6, C5AR1, ITGB2, VAV1	333	69	18082	7.08265	0.0700215	0.00907406	0.00896163
GOTERM_BP_DIRECT	GO:0045766	positive regulation of angiogenesis	2.83505	7.94099e-05	CX3CR1, LGALS3, IL1A, C5AR1, ITGB2, VASH2, C3AR1, CYBB, CTSH, PIK3R6, RAPGEF3	333	121	18082	4.93639	0.142576	0.017055	0.0168437
GOTERM_BP_DIRECT	GO:0019886	antigen processing and presentation of exogenous peptide antigen via MHC class II	1.28866	9.65904e-05	CD74, H2-DMB1, FCGR2B, H2-AA, H2-AB1	333	14	18082	19.393	0.170643	0.017055	0.0168437
GOTERM_BP_DIRECT	GO:0007155	cell adhesion	5.92784	9.68536e-05	CX3CR1, LGALS3BP, CGREF1, ACHE, ITGAM, COL14A1, AMIGO2, MSLNL, ITGB2, PTPRK, CD2, DPP4, ALCAM, PARVG, GPNMB, STAB1, ITGAX, CD36, MFGE8, SCARF2, FREM2, CD44, FERMT3	333	485	18082	2.57507	0.171066	0.017055	0.0168437
GOTERM_BP_DIRECT	GO:0006955	immune response	4.12371	0.000161119	CD74, TNFRSF1B, H2-AA, CTSS, VAV1, ENDOU, IL1A, CCL9, CCL6, H2-DMB1, ENPP1, CD36, CCR5, FCGR2B, CCR2, H2-AB1	333	272	18082	3.19414	0.268101	0.0254176	0.0251027
GOTERM_BP_DIRECT	GO:0002755	MyD88-dependent toll-like receptor signaling pathway	1.28866	0.000170588	TLR8, IRAK3, REG3G, TLR5, TLR13	333	16	18082	16.9688	0.281405	0.0254176	0.0251027
GOTERM_BP_DIRECT	GO:0050766	positive regulation of phagocytosis	1.80412	0.000234653	FCGR3, SLC11A1, CYBA, CD36, FCGR2B, MFGE8, MERTK	333	48	18082	7.91879	0.365283	0.0323023	0.0319021
GOTERM_BP_DIRECT	GO:0002250	adaptive immune response	2.83505	0.000250147	LAT2, LYN, CD74, CLEC4A2, ALCAM, CLEC4N, SLAMF7, SH2D1B1, CTSS, TNFRSF21, HAVCR2	333	139	18082	4.29715	0.384054	0.0323023	0.0319021
GOTERM_BP_DIRECT	GO:0043277	apoptotic cell clearance	1.28866	0.000278607	AXL, ALOX15, CD36, MERTK, CCR2	333	18	18082	15.0834	0.417098	0.0337289	0.0333109
GOTERM_BP_DIRECT	GO:0006935	chemotaxis	2.57732	0.000329359	LYN, CX3CR1, CCL9, CCL6, C5AR1, C3AR1, CXCR4, CCR5, CCR2, CXCL16	333	118	18082	4.60172	0.47169	0.0375275	0.0370625
GOTERM_BP_DIRECT	GO:0006909	phagocytosis	1.80412	0.000366073	HCK, AXL, SLC11A1, ITGB2, PLD4, MERTK, VAV1	333	52	18082	7.30966	0.507969	0.0393935	0.0389054
GOTERM_BP_DIRECT	GO:0045089	positive regulation of innate immune response	1.28866	0.000628516	CD74, TLR8, SH2D1B1, COCH, HAVCR2	333	22	18082	12.341	0.704125	0.0640755	0.0632816
GOTERM_BP_DIRECT	GO:0042130	negative regulation of T cell proliferation	1.54639	0.000786167	TGFB1, GPNMB, H2-AA, TNFRSF21, H2-AB1, HAVCR2	333	40	18082	8.14505	0.782032	0.0734432	0.0725332
GOTERM_BP_DIRECT	GO:0006898	receptor-mediated endocytosis	1.80412	0.000796235	MSR1, DAB2, LDLRAD3, APOE, CD36, FCGR2B, CXCL16	333	60	18082	6.33504	0.786244	0.0734432	0.0725332
GOTERM_BP_DIRECT	GO:0007159	leukocyte cell-cell adhesion	1.28866	0.000886973	PTPRC, ITGAM, ITGB2, MSN, FERMT3	333	24	18082	11.3126	0.820724	0.078094	0.0771264
GOTERM_BP_DIRECT	GO:0050729	positive regulation of inflammatory response	1.80412	0.00103211	CCL9, GPRC5B, CCL6, ADAM8, CCR5, CTSS, CCR2	333	63	18082	6.03337	0.864696	0.0869217	0.0858447
GOTERM_BP_DIRECT	GO:0001818	negative regulation of cytokine production	1.03093	0.0011932	GPNMB, AXL, SLC11A1, MERTK	333	12	18082	18.1001	0.900997	0.0947455	0.0935716
GOTERM_BP_DIRECT	GO:0006811	ion transport	5.92784	0.00122284	RYR2, HVCN1, SLC11A1, SLC39A11, CYBB, TRF, SLC38A11, SLCO1A6, SLC5A10, ATP12A, TMEM37, CLCN5, SLCO2B1, KCNS3, KCNMB4, FXYD6, FXYD5, STEAP1, ASIC2, GABRD, ATP6V0D2, KCNK2, GRIA3	333	584	18082	2.13854	0.906527	0.0947455	0.0935716
GOTERM_BP_DIRECT	GO:0007229	integrin-mediated signaling pathway	2.06186	0.00162213	VAV3, TYROBP, ITGAM, ITGB2, ITGAX, ADAM8, VAV1, FERMT3	333	93	18082	4.67099	0.956916	0.116373	0.114931
GOTERM_BP_DIRECT	GO:0050830	defense response to Gram-positive bacterium	2.06186	0.00162213	HCK, LYZ2, C5AR1, ACP5, CD36, REG3G, MYO1F, HAVCR2	333	93	18082	4.67099	0.956916	0.116373	0.114931
GOTERM_BP_DIRECT	GO:0010862	positive regulation of pathway-restricted SMAD protein phosphorylation	1.54639	0.0018153	GDF10, BMP3, DAB2, BMP2, TGFB1, INHBA	333	48	18082	6.78754	0.970384	0.12558	0.124024
GOTERM_BP_DIRECT	GO:0060279	positive regulation of ovulation	0.773196	0.00196799	PLAU, PLAT, INHBA	333	4	18082	40.7252	0.977979	0.131448	0.129819
GOTERM_BP_DIRECT	GO:2000249	regulation of actin cytoskeleton reorganization	1.03093	0.00236896	CSF1R, TGFB1, RHOD, RAPGEF3	333	15	18082	14.4801	0.989889	0.152956	0.151061
GOTERM_BP_DIRECT	GO:0001666	response to hypoxia	2.83505	0.00296434	DPP4, RYR2, EGLN3, BMP2, TGFB1, PLAU, CXCR4, CYBA, PLAT, ANGPTL4, MT3	333	192	18082	3.11095	0.996819	0.184732	0.182444
GOTERM_BP_DIRECT	GO:0035556	intracellular signal transduction	4.38144	0.00305185	GUCY2C, LYN, VAV3, GUCY1B3, NFAM1, HMHA1, ASB11, RASAL1, VAV1, LAT2, DCDC2A, INPP5D, ASB9, ARHGEF3, RAPGEF3, SPSB4, ARHGEF6	333	400	18082	2.30776	0.997316	0.184732	0.182444
GOTERM_BP_DIRECT	GO:0050853	B cell receptor signaling pathway	1.54639	0.00332294	LAT2, LYN, VAV3, PTPRC, NFAM1, RFTN1	333	55	18082	5.92367	0.998415	0.190948	0.188582
GOTERM_BP_DIRECT	GO:0042110	T cell activation	1.28866	0.00335169	CD2, DPP4, TGFB1, CD48, VAV1	333	34	18082	7.98534	0.998501	0.190948	0.188582
GOTERM_BP_DIRECT	GO:0030889	negative regulation of B cell proliferation	1.03093	0.00407888	LYN, INPP5D, FCGR2B, TNFRSF21	333	18	18082	12.0667	0.999635	0.222579	0.219821
GOTERM_BP_DIRECT	GO:0040007	growth	1.28866	0.00413672	BMP3, BMP2, TGFB1, RFTN1, INHBA	333	36	18082	7.54171	0.999674	0.222579	0.219821
GOTERM_BP_DIRECT	GO:0043408	regulation of MAPK cascade	1.54639	0.00450632	GDF10, BMP3, BMP2, TGFB1, INHBA, TLR13	333	59	18082	5.52206	0.999841	0.235912	0.232989
GOTERM_BP_DIRECT	GO:0034113	heterotypic cell-cell adhesion	1.03093	0.00477846	CD2, PTPRC, ITGB2, ITGAX	333	19	18082	11.4316	0.999907	0.23847	0.235515
GOTERM_BP_DIRECT	GO:0097350	neutrophil clearance	0.773196	0.00480141	AXL, MERTK, CCR2	333	6	18082	27.1502	0.999911	0.23847	0.235515
GOTERM_BP_DIRECT	GO:0002548	monocyte chemotaxis	1.28866	0.00606065	LGALS3, CCL9, CCL6, PDGFB, CCR2	333	40	18082	6.78754	0.999992	0.293487	0.289851
GOTERM_BP_DIRECT	GO:0045730	respiratory burst	0.773196	0.00664067	SLC11A1, CYBB, CYBA	333	7	18082	23.2716	0.999998	0.313731	0.309844
GOTERM_BP_DIRECT	GO:0001934	positive regulation of protein phosphorylation	2.57732	0.00704946	CSF1R, GPRC5B, DAB2, BMP2, TGFB1, GPNMB, PLAUR, CXCR4, MT3, RAPGEF3	333	184	18082	2.9511	0.999999	0.313887	0.309998
GOTERM_BP_DIRECT	GO:0048839	inner ear development	1.54639	0.00725197	C1QB, BMP2, TGFB1, BDNF, LIN7A, FREM2	333	66	18082	4.93639	0.999999	0.313887	0.309998
GOTERM_BP_DIRECT	GO:1902895	positive regulation of pri-miRNA transcription from RNA polymerase II promoter	1.03093	0.00729217	BMP2, SPI1, TGFB1, PDGFB	333	22	18082	9.87278	0.999999	0.313887	0.309998
GOTERM_BP_DIRECT	GO:0045582	positive regulation of T cell differentiation	1.03093	0.00729217	CD74, PTPRC, H2-AA, PIK3R6	333	22	18082	9.87278	0.999999	0.313887	0.309998
GOTERM_BP_DIRECT	GO:0032720	negative regulation of tumor necrosis factor production	1.28866	0.00784064	GPNMB, AXL, ACP5, IRAK3, HAVCR2	333	43	18082	6.31399	1	0.330159	0.326068
GOTERM_BP_DIRECT	GO:0048041	focal adhesion assembly	1.03093	0.00827351	ACTN2, DLC1, PTPRK, RHOD	333	23	18082	9.44353	1	0.340939	0.336714
GOTERM_BP_DIRECT	GO:0032494	response to peptidoglycan	0.773196	0.0087473	C5AR1, IRF5, IRAK3	333	8	18082	20.3626	1	0.340939	0.336714
GOTERM_BP_DIRECT	GO:0060907	positive regulation of macrophage cytokine production	0.773196	0.0087473	CD74, GPRC5B, CD36	333	8	18082	20.3626	1	0.340939	0.336714
GOTERM_BP_DIRECT	GO:0007165	signal transduction	9.27835	0.00906103	GUCY2C, CX3CR1, GUCY1B3, OXTR, C5AR1, CXCR4, RASAL1, PTPRK, ARHGAP22, GNG2, GNGT2, C3AR1, GAST, PLXNC1, CCR5, CCR2, CAP2, LYN, ARRDC4, CD74, GPR34, NFAM1, GPBAR1, HMHA1, IRAK3, SSTR1, ARHGAP25, GPRC5B, GPRC5A, SMOC1, DLC1, TLR8, CD48, TLR5, TNFRSF21, TLR13	333	1255	18082	1.55762	1	0.340939	0.336714
GOTERM_BP_DIRECT	GO:0006911	phagocytosis, engulfment	1.28866	0.00919984	FCGR3, BIN2, TREM2, FCGR2B, MFGE8	333	45	18082	6.03337	1	0.340939	0.336714
GOTERM_BP_DIRECT	GO:0010575	positive regulation of vascular endothelial growth factor production	1.03093	0.00932873	IL1A, C5AR1, C3AR1, SULF2	333	24	18082	9.05005	1	0.340939	0.336714
GOTERM_BP_DIRECT	GO:0008361	regulation of cell size	1.03093	0.00932873	VAV3, MSN, IL7R, VAV1	333	24	18082	9.05005	1	0.340939	0.336714
GOTERM_BP_DIRECT	GO:0042493	response to drug	3.60825	0.0100247	LYN, VAV3, CPB2, OXTR, TGFB1, UGT1A1, BDNF, CYBB, CYBA, INHBA, SLCO1A6, SERPINA7, DUSP6, TXNIP	333	339	18082	2.24249	1	0.35959	0.355135
GOTERM_BP_DIRECT	GO:0001960	negative regulation of cytokine-mediated signaling pathway	0.773196	0.0111109	IL1RN, PTPRC, IRAK3	333	9	18082	18.1001	1	0.371066	0.366469
GOTERM_BP_DIRECT	GO:0050798	activated T cell proliferation	0.773196	0.0111109	ITGAM, ITGB2, ITGAX	333	9	18082	18.1001	1	0.371066	0.366469
GOTERM_BP_DIRECT	GO:0002504	antigen processing and presentation of peptide or polysaccharide antigen via MHC class II	0.773196	0.0111109	H2-DMB1, H2-AA, H2-AB1	333	9	18082	18.1001	1	0.371066	0.366469
GOTERM_BP_DIRECT	GO:0006000	fructose metabolic process	0.773196	0.0111109	PFKFB3, ALDOB, FBP2	333	9	18082	18.1001	1	0.371066	0.366469
GOTERM_BP_DIRECT	GO:0070371	ERK1 and ERK2 cascade	1.03093	0.011665	OXTR, TRF, CTSH, MT3	333	26	18082	8.35389	1	0.382967	0.378222
GOTERM_BP_DIRECT	GO:0048468	cell development	1.28866	0.0123582	GDF10, BMP3, DCT, ARID5B, INHBA	333	49	18082	5.54085	1	0.398964	0.394021
GOTERM_BP_DIRECT	GO:0035023	regulation of Rho protein signal transduction	1.54639	0.0136322	VAV3, DLC1, RASGRF2, ARHGEF3, VAV1, ARHGEF6	333	77	18082	4.23119	1	0.408899	0.403832
GOTERM_BP_DIRECT	GO:0060395	SMAD protein signal transduction	1.54639	0.0136322	GDF10, BMP3, BMP2, TGFB1, TRF, INHBA	333	77	18082	4.23119	1	0.408899	0.403832
GOTERM_BP_DIRECT	GO:0033628	regulation of cell adhesion mediated by integrin	0.773196	0.0137214	LYN, PLAU, TESC	333	10	18082	16.2901	1	0.408899	0.403832
GOTERM_BP_DIRECT	GO:0002827	positive regulation of T-helper 1 type immune response	0.773196	0.0137214	SLC11A1, H2-AB1, CCR2	333	10	18082	16.2901	1	0.408899	0.403832
GOTERM_BP_DIRECT	GO:0030031	cell projection assembly	0.773196	0.0137214	VAV3, PDGFB, CAPG	333	10	18082	16.2901	1	0.408899	0.403832
GOTERM_BP_DIRECT	GO:0001819	positive regulation of cytokine production	1.03093	0.015746	NFAM1, SLC11A1, TLR5, HAVCR2	333	29	18082	7.4897	1	0.458489	0.452808
GOTERM_BP_DIRECT	GO:0010628	positive regulation of gene expression	3.86598	0.0160493	TGFB1, TLE1, TESC, SLC11A1, PLAUR, PDGFB, MSN, INHBA, MT3, IL1A, BMP2, CTSH, IL7R, CCR5, CD44	333	399	18082	2.04136	1	0.458489	0.452808
GOTERM_BP_DIRECT	GO:0042554	superoxide anion generation	0.773196	0.016569	NCF2, CYBB, CYBA	333	11	18082	14.8092	1	0.458489	0.452808
GOTERM_BP_DIRECT	GO:0050707	regulation of cytokine secretion	0.773196	0.016569	LYN, TLR8, TLR5	333	11	18082	14.8092	1	0.458489	0.452808
GOTERM_BP_DIRECT	GO:0050777	negative regulation of immune response	0.773196	0.016569	TGFB1, INPP5D, FCGR2B	333	11	18082	14.8092	1	0.458489	0.452808
GOTERM_BP_DIRECT	GO:0043406	positive regulation of MAP kinase activity	1.28866	0.0171824	TGFB1, NEK10, PDGFB, PIK3R6, PIK3R5	333	54	18082	5.02781	1	0.460886	0.455176
GOTERM_BP_DIRECT	GO:0019882	antigen processing and presentation	1.28866	0.0171824	CD74, H2-DMB1, H2-AA, CTSS, H2-AB1	333	54	18082	5.02781	1	0.460886	0.455176
GOTERM_BP_DIRECT	GO:0043066	negative regulation of apoptotic process	4.89691	0.0173695	CSF1R, CD74, IL1RN, BDNF, AMIGO2, PLAUR, FHL2, MT3, LGALS3, HCK, DAB2, AXL, CCNG1, CLEC5A, CTSH, ANGPTL4, ASIC2, BCL2A1B, CD44	333	566	18082	1.8228	1	0.460886	0.455176
GOTERM_BP_DIRECT	GO:0019221	cytokine-mediated signaling pathway	2.06186	0.0183481	CX3CR1, CSF1R, IL1A, IL1RN, IRF5, IRAK3, CD44, CCR2	333	146	18082	2.97536	1	0.480273	0.474322
GOTERM_BP_DIRECT	GO:0043552	positive regulation of phosphatidylinositol 3-kinase activity	1.03093	0.0188576	LYN, VAV3, TGFB1, PDGFB	333	31	18082	7.00649	1	0.481656	0.475688
GOTERM_BP_DIRECT	GO:0031100	organ regeneration	1.28866	0.0193982	TGFB1, UGT1A1, AXL, C5AR1, SLCO1A6	333	56	18082	4.84824	1	0.481656	0.475688
GOTERM_BP_DIRECT	GO:0045785	positive regulation of cell adhesion	1.28866	0.0193982	VAV3, DAB2, ADAM8, RHOD, VAV1	333	56	18082	4.84824	1	0.481656	0.475688
GOTERM_BP_DIRECT	GO:0097028	dendritic cell differentiation	0.773196	0.0196442	LYN, AXL, TREM2	333	12	18082	13.5751	1	0.481656	0.475688
GOTERM_BP_DIRECT	GO:2001259	positive regulation of cation channel activity	0.773196	0.0196442	ACTN2, ASIC2, CTSS	333	12	18082	13.5751	1	0.481656	0.475688
GOTERM_BP_DIRECT	GO:0048247	lymphocyte chemotaxis	1.03093	0.0222848	CCL9, CCL6, ADAM8, CXCL16	333	33	18082	6.58185	1	0.524426	0.517928
GOTERM_BP_DIRECT	GO:0033690	positive regulation of osteoblast proliferation	0.773196	0.0229377	BMP2, TMEM119, CTHRC1	333	13	18082	12.5308	1	0.524426	0.517928
GOTERM_BP_DIRECT	GO:0045576	mast cell activation	0.773196	0.0229377	FCGR3, CD48, FCGR2B	333	13	18082	12.5308	1	0.524426	0.517928
GOTERM_BP_DIRECT	GO:0042535	positive regulation of tumor necrosis factor biosynthetic process	0.773196	0.0229377	FCGR3, CYBB, CCR2	333	13	18082	12.5308	1	0.524426	0.517928
GOTERM_BP_DIRECT	GO:0002523	leukocyte migration involved in inflammatory response	0.773196	0.0229377	ITGAM, ITGB2, ADAM8	333	13	18082	12.5308	1	0.524426	0.517928
GOTERM_BP_DIRECT	GO:0006629	lipid metabolic process	4.12371	0.023013	IL1RN, ALOX15, ACOT12, PLD4, PLA2G7, PLB1, CYB5R2, LPCAT2, TBXAS1, APOF, THRSP, HMGCS2, APOE, LPIN2, PLTP, FDFT1	333	459	18082	1.89282	1	0.524426	0.517928
GOTERM_BP_DIRECT	GO:0050715	positive regulation of cytokine secretion	1.03093	0.0241171	IL1A, CLEC4N, CLEC5A, CD36	333	34	18082	6.38827	1	0.541891	0.535177
GOTERM_BP_DIRECT	GO:0009267	cellular response to starvation	1.28866	0.0243389	KLF10, CADPS2, PDK4, ANGPTL4, CARTPT	333	60	18082	4.52503	1	0.541891	0.535177
GOTERM_BP_DIRECT	GO:0030282	bone mineralization	1.03093	0.0260283	KLF10, BMP2, GPNMB, ALOX15	333	35	18082	6.20575	1	0.572919	0.56582
GOTERM_BP_DIRECT	GO:0070997	neuron death	0.773196	0.0264404	ACHE, PLAU, CCR5	333	14	18082	11.6358	1	0.575451	0.568321
GOTERM_BP_DIRECT	GO:0048008	platelet-derived growth factor receptor signaling pathway	1.03093	0.0280185	PDGFB, TXNIP, ARID5B, PLAT	333	36	18082	6.03337	1	0.596393	0.589003
GOTERM_BP_DIRECT	GO:0045786	negative regulation of cell cycle	1.03093	0.0280185	BMP2, TGFB1, INHBA, PTPRK	333	36	18082	6.03337	1	0.596393	0.589003
GOTERM_BP_DIRECT	GO:0032496	response to lipopolysaccharide	2.31959	0.0293446	UGT1A1, NCF2, IL10RA, SLC11A1, C5AR1, ACP5, IRAK3, TNFRSF1B, TNFRSF21	333	197	18082	2.48072	1	0.617832	0.610176
GOTERM_BP_DIRECT	GO:0051044	positive regulation of membrane protein ectodomain proteolysis	0.773196	0.0301437	ADAM8, APOE, TNFRSF1B	333	15	18082	10.8601	1	0.621154	0.613457
GOTERM_BP_DIRECT	GO:0007263	nitric oxide mediated signal transduction	0.773196	0.0301437	GUCY1B3, APOE, CD36	333	15	18082	10.8601	1	0.621154	0.613457
GOTERM_BP_DIRECT	GO:0018108	peptidyl-tyrosine phosphorylation	1.28866	0.0314947	LYN, CSF1R, HCK, PDGFB, SH2D1B1	333	65	18082	4.17695	1	0.64216	0.634204
GOTERM_BP_DIRECT	GO:0072593	reactive oxygen species metabolic process	1.03093	0.0322344	PDK4, PDGFB, CYBA, VAV1	333	38	18082	5.71582	1	0.643691	0.635715
GOTERM_BP_DIRECT	GO:0043491	protein kinase B signaling	1.03093	0.0322344	TGFB1, AXL, MERTK, MT3	333	38	18082	5.71582	1	0.643691	0.635715
GOTERM_BP_DIRECT	GO:0001525	angiogenesis	2.57732	0.0328645	ARHGAP22, VAV3, PLAU, ADAM8, ANGPTL4, THSD7A, MFGE8, PIK3R6, RAPGEF3, CCR2	333	239	18082	2.27198	1	0.649576	0.641528
GOTERM_BP_DIRECT	GO:0071361	cellular response to ethanol	0.773196	0.0340391	SPI1, UGT1A1, CYBB	333	16	18082	10.1813	1	0.665997	0.657745
GOTERM_BP_DIRECT	GO:0001938	positive regulation of endothelial cell proliferation	1.28866	0.0346674	BMP2, CAV2, VASH2, PDGFB, CYBA	333	67	18082	4.05226	1	0.671225	0.662909
GOTERM_BP_DIRECT	GO:2001189	negative regulation of T cell activation via T cell receptor contact with antigen bound to MHC molecule on antigen presenting cell	0.515464	0.0363855	LGALS3, HAVCR2	333	2	18082	54.3003	1	0.671225	0.662909
GOTERM_BP_DIRECT	GO:0034381	plasma lipoprotein particle clearance	0.515464	0.0363855	MSR1, CD36	333	2	18082	54.3003	1	0.671225	0.662909
GOTERM_BP_DIRECT	GO:2000521	negative regulation of immunological synapse formation	0.515464	0.0363855	LGALS3, HAVCR2	333	2	18082	54.3003	1	0.671225	0.662909
GOTERM_BP_DIRECT	GO:0002764	immune response-regulating signaling pathway	0.515464	0.0363855	LAT2, CTSH	333	2	18082	54.3003	1	0.671225	0.662909
GOTERM_BP_DIRECT	GO:2000473	positive regulation of hematopoietic stem cell migration	0.515464	0.0363855	PTPRC, CCR2	333	2	18082	54.3003	1	0.671225	0.662909
GOTERM_BP_DIRECT	GO:0030217	T cell differentiation	1.03093	0.0391417	PTPRC, TGFB1, IL7R, VAV1	333	41	18082	5.29759	1	0.715259	0.706397
GOTERM_BP_DIRECT	GO:0031954	positive regulation of protein autophosphorylation	0.773196	0.0423732	GPNMB, NEK10, PDGFB	333	18	18082	9.05005	1	0.767073	0.757569
GOTERM_BP_DIRECT	GO:0043410	positive regulation of MAPK cascade	1.54639	0.0427836	BMP2, PTPRC, CAV2, PDGFB, CD36, TNFRSF1B	333	104	18082	3.13271	1	0.767331	0.757823
GOTERM_BP_DIRECT	GO:0055114	oxidation-reduction process	5.15464	0.043941	EGLN3, GSTO2, GLDC, NCF2, ALOX15, DIO1, CYBB, CYBA, FAM213A, CYP17A1, CYB5R2, ALDH1A3, CYP4X1, CYP4F18, DHRS9, TBXAS1, ME3, STEAP1, UOX, FDFT1	333	676	18082	1.60652	1	0.780859	0.771184
GOTERM_BP_DIRECT	GO:0030336	negative regulation of cell migration	1.54639	0.045801	CX3CR1, IL1RN, DLC1, PDGFB, PTPRK, CCR5	333	106	18082	3.0736	1	0.806514	0.796521
GOTERM_BP_DIRECT	GO:0006801	superoxide metabolic process	0.773196	0.0467961	NCF2, CYBB, CYBA	333	19	18082	8.57373	1	0.816021	0.805911
GOTERM_BP_DIRECT	GO:0033138	positive regulation of peptidyl-serine phosphorylation	1.28866	0.0471835	TGFB1, BDNF, HCLS1, CD44, RAPGEF3	333	74	18082	3.66894	1	0.816021	0.805911
GOTERM_BP_DIRECT	GO:0016337	single organismal cell-cell adhesion	1.54639	0.0489423	CD2, CD53, CRISP2, ITGAM, ITGB2, ADAM8	333	108	18082	3.01668	1	0.831375	0.821074
GOTERM_BP_DIRECT	GO:0007166	cell surface receptor signaling pathway	2.31959	0.0495459	CD53, FCGR3, TSPAN6, TSPAN4, CD36, TNFRSF1B, FCGR2B, TSPAN1, TSPAN33	333	219	18082	2.23152	1	0.831375	0.821074
GOTERM_BP_DIRECT	GO:0061098	positive regulation of protein tyrosine kinase activity	0.773196	0.0513794	CSF1R, GPRC5B, PDGFB	333	20	18082	8.14505	1	0.831375	0.821074
GOTERM_BP_DIRECT	GO:0019722	calcium-mediated signaling	1.03093	0.0521722	LAT2, RYR2, CXCR4, CCR5	333	46	18082	4.72177	1	0.831375	0.821074
GOTERM_BP_DIRECT	GO:0030154	cell differentiation	5.6701	0.0523252	ZMYND15, TESC, TMTC3, ILDR2, RASAL1, DLK1, DUSP6, EDA2R, ARHGAP22, LGALS3, BMP3, HCK, DAB2, BMP2, AXL, SMOC1, TMEM119, THSD7A, MORC1, MDGA1, ROS1, DBN1	333	780	18082	1.53155	1	0.831375	0.821074
GOTERM_BP_DIRECT	GO:0006810	transport	11.3402	0.0523985	RYR2, HVCN1, SLC1A1, TRF, SLC38A11, AQP4, LIN7A, SLC7A11, SLCO1A6, SLC5A10, ATP12A, SNX31, TTR, SLCO2B1, APOF, KCNMB4, CD36, APOE, GC, ASIC2, GABRD, PLTP, DYNC1I1, GRIA3, CADPS2, SLC37A2, TESC, SLC11A1, LAPTM5, SLC39A11, CYBB, CYBA, SORCS2, TMEM37, DAB2, CLCN5, KCNS3, FXYD6, HAP1, KDELR3, FXYD5, STEAP1, KCNK2, ATP6V0D2	333	1822	18082	1.31131	1	0.831375	0.821074
GOTERM_BP_DIRECT	GO:0043932	ossification involved in bone remodeling	0.515464	0.0540802	TGFB1, CTHRC1	333	3	18082	36.2002	1	0.831375	0.821074
GOTERM_BP_DIRECT	GO:0051250	negative regulation of lymphocyte activation	0.515464	0.0540802	AXL, MERTK	333	3	18082	36.2002	1	0.831375	0.821074
GOTERM_BP_DIRECT	GO:1904845	cellular response to L-glutamine	0.515464	0.0540802	CYBB, CYBA	333	3	18082	36.2002	1	0.831375	0.821074
GOTERM_BP_DIRECT	GO:0002513	tolerance induction to self antigen	0.515464	0.0540802	LYN, TGFB1	333	3	18082	36.2002	1	0.831375	0.821074
GOTERM_BP_DIRECT	GO:0042531	positive regulation of tyrosine phosphorylation of STAT protein	0.515464	0.0540802	LYN, HCLS1	333	3	18082	36.2002	1	0.831375	0.821074
GOTERM_BP_DIRECT	GO:1904044	response to aldosterone	0.515464	0.0540802	CYBB, CYBA	333	3	18082	36.2002	1	0.831375	0.821074
GOTERM_BP_DIRECT	GO:0050855	regulation of B cell receptor signaling pathway	0.515464	0.0540802	LYN, PTPRC	333	3	18082	36.2002	1	0.831375	0.821074
GOTERM_BP_DIRECT	GO:0002246	wound healing involved in inflammatory response	0.515464	0.0540802	CD44, CCR2	333	3	18082	36.2002	1	0.831375	0.821074
GOTERM_BP_DIRECT	GO:0090280	positive regulation of calcium ion import	0.773196	0.0561158	LGALS3, PDGFB, CXCR4	333	21	18082	7.75719	1	0.855877	0.845272
GOTERM_BP_DIRECT	GO:0001649	osteoblast differentiation	1.54639	0.0573389	GDF10, BMP3, BMP2, GPNMB, TMEM119, FHL2	333	113	18082	2.8832	1	0.862692	0.852003
GOTERM_BP_DIRECT	GO:0060048	cardiac muscle contraction	1.03093	0.0578988	MYL4, RYR2, TNNI2, CXCR4	333	48	18082	4.52503	1	0.862692	0.852003
GOTERM_BP_DIRECT	GO:0045599	negative regulation of fat cell differentiation	1.03093	0.0578988	TGFB1, ENPP1, DLK1, RUNX1T1	333	48	18082	4.52503	1	0.862692	0.852003
GOTERM_BP_DIRECT	GO:0016064	immunoglobulin mediated immune response	0.773196	0.0609982	CD74, INPP5D, FCGR2B	333	22	18082	7.40459	1	0.901935	0.89076
GOTERM_BP_DIRECT	GO:0016477	cell migration	2.06186	0.0628161	VAV3, TGFB1, CXCR4, GFRA1, PTPRK, TSPAN1, CD44, CTHRC1	333	191	18082	2.27436	1	0.921778	0.910357
GOTERM_BP_DIRECT	GO:0008202	steroid metabolic process	1.28866	0.068847	CYB5R2, APOF, HMGCS2, CYP17A1, FDFT1	333	84	18082	3.23216	1	0.961114	0.949205
GOTERM_BP_DIRECT	GO:0032755	positive regulation of interleukin-6 production	1.03093	0.0701943	IL1A, CYBA, CD36, CCR5	333	52	18082	4.17695	1	0.961114	0.949205
GOTERM_BP_DIRECT	GO:0007157	heterophilic cell-cell adhesion via plasma membrane cell adhesion molecules	1.03093	0.0701943	ALCAM, GM609, AMIGO2, SCARF2	333	52	18082	4.17695	1	0.961114	0.949205
GOTERM_BP_DIRECT	GO:0042572	retinol metabolic process	0.773196	0.0711733	ALDH1A3, TTR, PLB1	333	24	18082	6.78754	1	0.961114	0.949205
GOTERM_BP_DIRECT	GO:0006508	proteolysis	4.38144	0.0714091	CPB2, 1810009J06RIK, TMPRSS2, PLAT, PRSS23, CTSS, MMP12, DPP4, ENDOU, PLAU, C1RL, DPEP2, NRIP3, CTSH, ADAM8, GM2663, PAMR1	333	582	18082	1.58609	1	0.961114	0.949205
GOTERM_BP_DIRECT	GO:0001915	negative regulation of T cell mediated cytotoxicity	0.515464	0.0714509	PTPRC, IL7R	333	4	18082	27.1502	1	0.961114	0.949205
GOTERM_BP_DIRECT	GO:0089711	L-glutamate transmembrane transport	0.515464	0.0714509	SLC1A1, SLC7A11	333	4	18082	27.1502	1	0.961114	0.949205
GOTERM_BP_DIRECT	GO:0032929	negative regulation of superoxide anion generation	0.515464	0.0714509	PON3, ACP5	333	4	18082	27.1502	1	0.961114	0.949205
GOTERM_BP_DIRECT	GO:2000345	regulation of hepatocyte proliferation	0.515464	0.0714509	PLAU, SULF2	333	4	18082	27.1502	1	0.961114	0.949205
GOTERM_BP_DIRECT	GO:0070447	positive regulation of oligodendrocyte progenitor proliferation	0.515464	0.0714509	LYN, TRF	333	4	18082	27.1502	1	0.961114	0.949205
GOTERM_BP_DIRECT	GO:0045123	cellular extravasation	0.515464	0.0714509	ITGAM, ITGB2	333	4	18082	27.1502	1	0.961114	0.949205
GOTERM_BP_DIRECT	GO:0033632	regulation of cell-cell adhesion mediated by integrin	0.515464	0.0714509	DPP4, FERMT3	333	4	18082	27.1502	1	0.961114	0.949205
GOTERM_BP_DIRECT	GO:0042981	regulation of apoptotic process	2.06186	0.0745207	GDF10, BMP3, BMP2, TGFB1, IRAK3, INHBA, TNFRSF1B, TNFRSF21	333	199	18082	2.18293	1	0.995494	0.98316
GOTERM_BP_DIRECT	GO:0030509	BMP signaling pathway	1.28866	0.0761925	GDF10, ZCCHC12, BMP3, RYR2, BMP2	333	87	18082	3.12071	1	1	0.98812
GOTERM_BP_DIRECT	GO:0014065	phosphatidylinositol 3-kinase signaling	0.773196	0.0764528	NYAP2, PIK3R6, PIK3R5	333	25	18082	6.51604	1	1	0.98812
GOTERM_BP_DIRECT	GO:0030308	negative regulation of cell growth	1.54639	0.0806432	CGREF1, DAB2, TGFB1, ENPP1, INHBA, MT3	333	125	18082	2.60641	1	1	0.98812
GOTERM_BP_DIRECT	GO:0048545	response to steroid hormone	0.773196	0.0818518	PAQR9, DAB2, OXTR	333	26	18082	6.26542	1	1	0.98812
GOTERM_BP_DIRECT	GO:0034341	response to interferon-gamma	0.773196	0.0818518	SLC11A1, H2-AA, CXCL16	333	26	18082	6.26542	1	1	0.98812
GOTERM_BP_DIRECT	GO:1901215	negative regulation of neuron death	1.03093	0.0835577	GPNMB, BDNF, APOE, MT3	333	56	18082	3.87859	1	1	0.98812
GOTERM_BP_DIRECT	GO:0016126	sterol biosynthetic process	0.773196	0.0873641	CYB5R2, HMGCS2, FDFT1	333	27	18082	6.03337	1	1	0.98812
GOTERM_BP_DIRECT	GO:0032689	negative regulation of interferon-gamma production	0.773196	0.0873641	AXL, SH2D1B1, HAVCR2	333	27	18082	6.03337	1	1	0.98812
GOTERM_BP_DIRECT	GO:0070328	triglyceride homeostasis	0.773196	0.0873641	ANGPTL4, APOE, SLCO1A6	333	27	18082	6.03337	1	1	0.98812
GOTERM_BP_DIRECT	GO:0008152	metabolic process	3.60825	0.0877294	UGT1A1, GSTO2, LYZ2, SULF2, DCTD, MAN1A, ALDH1A3, DCT, LPCAT2, ENPP1, HMGCS2, BCAT1, FBP2, FDFT1	333	463	18082	1.64191	1	1	0.98812
GOTERM_BP_DIRECT	GO:0098542	defense response to other organism	0.515464	0.0885036	TLR8, TLR13	333	5	18082	21.7201	1	1	0.98812
GOTERM_BP_DIRECT	GO:0042482	positive regulation of odontogenesis	0.515464	0.0885036	BMP2, TGFB1	333	5	18082	21.7201	1	1	0.98812
GOTERM_BP_DIRECT	GO:1900426	positive regulation of defense response to bacterium	0.515464	0.0885036	CYBA, HAVCR2	333	5	18082	21.7201	1	1	0.98812
GOTERM_BP_DIRECT	GO:0010574	regulation of vascular endothelial growth factor production	0.515464	0.0885036	AQP4, CCR2	333	5	18082	21.7201	1	1	0.98812
GOTERM_BP_DIRECT	GO:0001660	fever generation	0.515464	0.0885036	IL1A, IL1RN	333	5	18082	21.7201	1	1	0.98812
GOTERM_BP_DIRECT	GO:0002906	negative regulation of mature B cell apoptotic process	0.515464	0.0885036	CD74, CD44	333	5	18082	21.7201	1	1	0.98812
GOTERM_BP_DIRECT	GO:0043551	regulation of phosphatidylinositol 3-kinase activity	0.515464	0.0885036	PIK3R6, PIK3R5	333	5	18082	21.7201	1	1	0.98812
GOTERM_BP_DIRECT	GO:0010936	negative regulation of macrophage cytokine production	0.515464	0.0885036	TGFB1, IRAK3	333	5	18082	21.7201	1	1	0.98812
GOTERM_BP_DIRECT	GO:0001961	positive regulation of cytokine-mediated signaling pathway	0.515464	0.0885036	CD74, AXL	333	5	18082	21.7201	1	1	0.98812
GOTERM_BP_DIRECT	GO:0043065	positive regulation of apoptotic process	2.83505	0.0897355	ALDH1A3, BMP2, TGFB1, BDNF, INPP5D, TXNIP, IRF5, CCK, BCL2A1B, DUSP6, PHLDA3	333	335	18082	1.78299	1	1	0.98812
GOTERM_BP_DIRECT	GO:0071222	cellular response to lipopolysaccharide	2.06186	0.091107	CX3CR1, AXL, CD300LB, CD36, TNFRSF1B, TLR5, HAVCR2, CXCL16	333	209	18082	2.07848	1	1	0.98812
GOTERM_BP_DIRECT	GO:0090023	positive regulation of neutrophil chemotaxis	0.773196	0.0929838	CD74, C5AR1, C3AR1	333	28	18082	5.81789	1	1	0.98812
GOTERM_BP_DIRECT	GO:0032760	positive regulation of tumor necrosis factor production	1.03093	0.0942377	CD2, CYBA, CD36, CCR5	333	59	18082	3.68138	1	1	0.98812
GOTERM_BP_DIRECT	GO:0042060	wound healing	1.28866	0.0947824	MMP12, TGFB1, PLAU, SLC11A1, ALOX15	333	94	18082	2.88831	1	1	0.98812
GOTERM_BP_DIRECT	GO:0008285	negative regulation of cell proliferation	3.09278	0.0980507	LYN, CSF1R, IL1A, BMP2, TGFB1, CAV2, DLC1, TESC, INPP5D, INHBA, PTPRK, SSTR1	333	384	18082	1.69688	1	1	0.98812
GOTERM_BP_DIRECT	GO:0097421	liver regeneration	0.773196	0.0987051	CPB2, TGFB1, SULF2	333	29	18082	5.61727	1	1	0.98812

## Sheet: UP_CC_Dev_vs_Healthy
#Upregulated GO enrichemnt in Development vs Healthy Adult Group
#Cellular Component
Category	ID	Term	%	PValue	Genes	List Total	Pop Hits	Pop Total	Fold Enrichment	Bonferroni	Benjamini	FDR
GOTERM_CC_DIRECT	GO:0005576	extracellular region	19.8561	7.28432e-78	VIT, PGLYRP2, SERPINE2, SCT, SERPINE1, COL12A1, ISM1, ISLR, LIPC, IGLON5, LIPG, LIPK, VSTM4, PGLYRP1, KRTDAP, SERPINF1, COL23A1, SERPINF2, HSPG2, DKK2, DKK3, OPTC, SERPING1, FREM1, CFB, CFH, DHH, CFI, PDGFB, CFP, ADAMTS12, ADAMTS10, ADAMTS16, ADAMTS15, ADAMTS14, FLRT2, ADAMTS19, FLRT3, PLAC1, GSDMD, NAPSA, ACE, TSLP, FN1, COL1A1, COL1A2, KITL, PNOC, TINAGL1, ELN, WFIKKN2, ADM, C1QTNF9, SERPINA6, …	2252	1753	19662	2.33588	4.80765e-75	4.80765e-75	4.34874e-75
GOTERM_CC_DIRECT	GO:0005578	proteinaceous extracellular matrix	7.07028	3.54453e-73	VIT, SPON1, COL16A1, OLFML2B, SPARC, COL12A1, TNC, FGF1, OLFML2A, LOXL1, CTGF, LGALS3, EFEMP1, LGALS1, TNR, HMCN1, TGM2, POSTN, WNT5A, OMD, NPNT, HSPG2, SFRP1, CCDC80, COL4A2, LOX, COL4A1, OPTC, COL4A4, COL8A2, COL8A1, FREM1, COL17A1, FBN2, LTBP4, DPT, FBLN1, LTBP2, NID1, ADAMTS12, FBLN2, NID2, LTBP1, FBLN5, ADAMTS10, ADAMTS16, ADAMTS15, WNT6, ADAMTS14, OTOA, FLRT2, ADAMTS19, ADAMTS17, WNT2, TGFB…	2252	316	19662	4.61412	2.33939e-70	1.16969e-70	1.05804e-70
GOTERM_CC_DIRECT	GO:0031012	extracellular matrix	5.96952	7.29266e-55	SPON1, TPSB2, SERPINE2, COL12A1, SERPINE1, TNC, LOXL1, LGALS3, EFEMP1, TUBB5, LGALS1, TGM2, POSTN, CD93, SERPINF1, OMD, PCOLCE, NPNT, HSPG2, SFRP1, COL4A2, COL4A1, COL8A2, COL8A1, PRTN3, S100A9, FBN2, LTBP4, HTRA1, PDGFB, DPT, FBLN1, LTBP2, AEBP1, NID1, CFP, ADAMTS12, FBLN2, NID2, LTBP1, FBLN5, ADAMTS10, ADAMTS16, ADAMTS15, ADAMTS19, APOH, IGFBP7, APOE, WNT2, TGFB2, TGFB1, TGFB3, RARRES2, FN1, SS…	2252	294	19662	4.18727	4.81315e-52	1.60438e-52	1.45124e-52
GOTERM_CC_DIRECT	GO:0005615	extracellular space	15.0296	8.30681e-44	PRSS1, SPON1, SPARC, SERPINE2, SCT, 1810009J06RIK, COL12A1, SERPINE1, ICAM1, LGALS3, LIPC, LGALS1, DPYSL3, LIPG, TNFSF11, PGLYRP1, LGALS7, CER1, SERPINF1, COL23A1, SERPINF2, OMD, HSPG2, DKK2, DKK3, SFRP4, SFRP1, SFRP2, PAPPA, CD109, PLBD1, SERPING1, CFB, NRN1, CFH, DHH, CFI, PDGFB, KLK8, ADAMTS15, APOM, FLRT2, BLOC1S1, FLRT3, APOH, SERPINH1, APOE, CD14, ELANE, CCL21A, GSDMD, NAPSA, ACE, TSLP, MCA…	2252	1504	19662	2.06082	5.48249e-41	1.37062e-41	1.23979e-41
GOTERM_CC_DIRECT	GO:0009986	cell surface	7.45131	1.51306e-30	IFITM3, CD86, SCARB1, PLVAP, SPARC, HHIP, MPL, PLAT, ANTXR2, ANTXR1, TNF, ICAM1, CDH5, LGALS3, LIPC, LGALS1, PLAU, CLEC5A, LIPG, KDR, TNR, PTGFRN, PDGFRB, EPHA4, PDGFRA, TIMD2, CD93, SCARA5, SLC11A1, SERPINF2, WNT5A, COL23A1, F2R, SFRP4, SFRP1, TYROBP, CD109, ADAM8, PLA2R1, EPHA2, GRIA1, CSF1R, ADCYAP1R1, IGSF3, SDC2, C5AR1, LPAR1, PDGFB, THY1, MST1R, NID2, CRHR2, ADAMTS15, WNT6, OTOA, APOH, APOE…	2252	629	19662	2.44299	9.98619e-28	1.99724e-28	1.80659e-28
GOTERM_CC_DIRECT	GO:0005604	basement membrane	2.37087	3.44997e-27	COL18A1, SPARC, LAMC3, TNC, TRF, LAMC1, LOXL1, EFEMP1, ADAMTS1, TIMP2, TIMP3, HMCN1, TIMP1, EGFL6, ANXA2, SERPINF1, NPNT, HSPG2, CCDC80, COL4A2, COL4A1, COL4A4, MMRN2, COL4A6, COL8A2, COL4A5, COL8A1, VWA1, VWA2, FREM1, FREM2, COL17A1, LAMA5, COL15A1, LAMA2, LAMA1, LAMA4, PAPLN, NTN4, FBLN1, PTN, NID1, THBS2, NID2, THBS4, EGFLAM, TGFB2, LAMB2, FN1, LAMB1, SMOC2, COL5A1, ALB, TGFBI, AGRN, FBN1	2252	97	19662	5.04052	2.27698e-24	3.79496e-25	3.43272e-25
GOTERM_CC_DIRECT	GO:0016020	membrane	43.1414	3.43479e-24	PGLYRP2, CLDN1, TMEM91, FAM159A, HTR7, TMEM88, NDST3, TMEM8C, C3AR1, LRAT, VSTM4, GTSE1, VSTM5, UNC5C, CACNA2D4, PDZK1, CLDN5, SLC5A7, CLDN4, VOPP1, CYP2E1, AGTR2, HPD, TTYH3, HS3ST3A1, COL13A1, DHH, PDGFB, CLCNKB, FPR1, NCAPG, THY1, FPR2, NCAPH, HSD11B1, KCNMB4, KCNE1L, GPIHBP1, LYN, GPR17, CADM3, JAG1, ABCA6, ABCA9, GRIN2C, AIF1L, GRIN3A, VANGL2, FXYD3, TREML4, FXYD7, NOX4, DCHS1, MRVI1, FXYD6,…	2252	6998	19662	1.27133	2.26696e-21	3.23852e-22	2.92939e-22
GOTERM_CC_DIRECT	GO:0005581	collagen trimer	1.98984	2.10402e-22	COL17A1, C1QB, COL18A1, COL15A1, COL16A1, COL13A1, COL14A1, COL11A1, COL12A1, C1QTNF9, COL19A1, FCNA, C1QTNF3, C1QTNF2, C1QTNF7, C1QTNF6, C1QTNF5, EMILIN2, MBL1, MBL2, CTHRC1, MSR1, SCARA3, COL26A1, COL25A1, COL23A1, PCOLCE, COLQ, COL1A1, MARCO, COL3A1, COL1A2, COL4A2, COL5A1, LOX, COL4A1, COL4A4, COL6A2, COL5A2, COL6A1, COL8A2, COL9A1, COL4A5, COL8A1, COL6A5, COL9A2, C1QC	2252	83	19662	4.94401	1.38866e-19	1.73582e-20	1.57013e-20
GOTERM_CC_DIRECT	GO:0070062	extracellular exosome	18.6283	2.61744e-17	PGLYRP2, SERPINE1, COL12A1, MYLK, SMC2, GJA1, ISLR, STMN1, PGLYRP1, CUBN, PRKCH, SERPINF1, SERPINF2, RNASE6, PDZK1, HOGA1, HSPG2, CLDN5, DAAM2, SERPING1, HPD, FREM2, CFB, TTYH3, CFH, CRABP2, SHMT1, CFI, THY1, LDHA, FLRT2, BLOC1S1, S100A16, FIGNL1, SERPINH1, CHST14, HAO2, ELANE, LYN, NAPSA, ACE, FZD4, FN1, AIF1L, EHD2, BHMT, COL1A2, FXYD3, GIPC2, FAT4, FERMT3, GABRB2, TINAGL1, QPRT, PYGM, PYGL, C1…	2252	2674	19662	1.43665	1.72751e-14	1.91946e-15	1.73624e-15
GOTERM_CC_DIRECT	GO:0009897	external side of plasma membrane	3.76799	9.71967e-16	CD86, ROBO4, ITGAM, TNFRSF13B, FLT3, ITGB3, CLEC14A, ITGAE, SLC2A4, ITGAL, CD3E, ANTXR2, ANTXR1, TNF, ICAM1, LY6C1, AMOT, CDH5, CD1D2, LGALS3, CD1D1, KDR, CCR7, CD36, CD34, CD33, EPHA5, FGB, PDGFRA, FGA, VWF, ITGA1, FGG, ICOSL, RTN4RL2, OSMR, TGFBR2, FCGR1, ADAM19, FCGR3, CD200R1, KIT, PECAM1, CDH13, CD48, ITGA5, LY6A, MFGE8, ENG, GYPA, CHRNA4, CXCR4, THY1, IL2RG, THBS1, CD79B, IL1RL1, CXCR3, PDP…	2252	317	19662	2.45126	6.59472e-13	6.41498e-14	5.80264e-14
GOTERM_CC_DIRECT	GO:0045121	membrane raft	3.17528	6.97108e-14	ITGB2, SLC2A4, TNF, SLC6A2, ICAM1, HK1, GJA1, EDNRA, EDNRB, CASP3, KDR, OLR1, TNR, CD36, NOS1, PTRF, EPHB1, ANXA2, NFAM1, ITGA1, EMP2, RTN4RL2, PDZK1, TNFRSF1B, TGFBR2, FCGR1, ZAP70, GPRC5B, SDPR, LTB4R1, MALL, PECAM1, BTK, MYADM, CD48, TLR6, RGS19, AHNAK, KCNE3, ITLN1, KCNA3, KCNA5, ADCY2, LRP2, ADCY1, THY1, ADCY5, CNR1, PODXL, INPP5D, ERBB2, SERPINH1, STOM, DMD, CD14, GPM6B, CD55, RFTN2, LYN, K…	2252	262	19662	2.49931	4.60165e-11	4.18265e-12	3.7834e-12
GOTERM_CC_DIRECT	GO:0005887	integral component of plasma membrane	8.72142	4.28431e-12	HHIP, ICAM2, AQP3, CLDN1, FGFRL1, ICAM1, AQP1, HTR7, GJA5, KDR, C3AR1, A630033H20RIK, EPHB2, SLC12A7, EPHB1, EPHB4, IFITM5, EPHB3, MFSD2A, EPHA5, EPHA4, SLC6A13, KCNK16, TM4SF1, SLC5A7, CLDN4, EPHA3, EPHA2, GYPA, PCDH10, CLCNKB, LPAR1, FPR1, LPAR4, PCDH12, FPR2, APCDD1, PCDH18, CD79B, FLRT2, FLRT3, TSPAN6, TSPAN4, SLC19A3, KCNMB4, ICOS, TSPAN1, GPR17, CADM3, SLC10A6, SLC10A1, LRRN4, FXYD3, PTK7, …	2252	1126	19662	1.59731	2.82767e-09	2.35637e-10	2.13144e-10
GOTERM_CC_DIRECT	GO:0005886	plasma membrane	29.2125	1.62821e-11	CLDN1, FGFRL1, PREX2, GJA1, GPR176, HTR7, EVA1A, TMEM88, GJA5, GJA4, TMEM8C, C3AR1, PLCE1, VSTM4, GPR179, CMKLR1, CUBN, PRKCH, COL23A1, UNC5C, PDZK1, SYTL2, CLDN5, SLC5A7, AR, CLDN4, PRKD3, TYRO3, PRKCQ, AGTR2, FREM2, TTYH3, CFH, COL13A1, DHH, CDCA5, CLCNKB, FPR1, THY1, FPR2, GJC1, FLRT2, S100A16, FLRT3, SLC19A3, ZFP185, GSG1L, KCNE1L, GPIHBP1, FZD1, GSDMD, LYN, GPR17, CADM3, AFAP1L2, JAG1, ACE, …	2252	4874	19662	1.23601	1.07462e-08	8.26629e-10	7.47723e-10
GOTERM_CC_DIRECT	GO:0031225	anchored component of membrane	1.9475	6.65895e-11	LY6C2, LY6I, NRN1, ITLN1, THY1, MSLN, EFNA4, ART3, ART4, LY6C1, NT5E, OTOA, GPC3, GPC2, CD14, PRND, CD55, CD177, GPIHBP1, NTNG1, CD52, LYNX1, VCAM1, LSAMP, PLAUR, RTN4RL2, GFRA2, RGMA, GFRA4, RAET1D, BST2, BST1, EFNA2, CD109, MMP17, DPEP2, CDH13, DPEP1, MMP19, GAS1, CD48, LY6A, FOLR2, SMPDL3B, MDGA1, SPRN	2252	141	19662	2.84838	4.39491e-08	3.13922e-09	2.83957e-09
GOTERM_CC_DIRECT	GO:0030054	cell junction	5.7155	5.45856e-09	CHRM2, LDLRAD3, CLDN1, AMOT, CDH5, GJA1, BAIAP2L2, BASP1, GJA5, GJA4, KDR, HMCN1, EPHA4, CHRNB4, STARD8, UNC5C, SHISA9, CLDN5, ARC, CLDN4, BIN2, DOK7, FSCN1, AJUBA, EPHA2, COL17A1, GRIA1, CHRNA3, NRN1, COL13A1, CHRNA4, FBLIM1, LIN7A, PCDH12, RASGRP2, EVPL, IGSF9, GJC1, FLRT2, FLRT3, 9430020K01RIK, HOXC5, ZFP185, GSG1L, ECT2, LRRC4C, GRIA3, GRIA4, CADM3, AFAP1L1, ARHGAP28, GRIN2C, SDK1, ARHGAP31, …	2252	718	19662	1.6416	3.60264e-06	2.40177e-07	2.17251e-07
GOTERM_CC_DIRECT	GO:0005925	focal adhesion	3.59865	7.26448e-09	NRP1, FLT1, ITGB3, TGFB1I1, TNC, FHL2, RND3, ICAM1, AKAP12, MRC2, GJA1, CSRP2, CSRP1, PLAU, RAC2, PGM5, TGM2, TNS1, PDGFRB, ANXA1, STARD8, ITGA1, PLAUR, AFAP1, CYBA, KIF23, KIF22, HSPG2, APBB1IP, HCK, MMP14, ITGA8, CDH13, ITGA5, AJUBA, EPHA2, DDR2, ENG, LRP1, AHNAK, FBLIM1, NEXN, THY1, ARHGAP22, EFNB2, PDLIM1, CNN2, CNN1, PDLIM2, FLRT2, FLRT3, TSPAN4, ZFP185, FLNA, FLNC, PDLIM7, FZD1, FZD2, CAV2,…	2252	391	19662	1.89802	4.79454e-06	2.9966e-07	2.71056e-07
GOTERM_CC_DIRECT	GO:0042383	sarcolemma	1.56647	1.98557e-08	POPDC2, RYR1, RYR2, SYNM, LAMA2, AHNAK, DYSF, SLC2A4, CACNA1H, ADCY5, AQP1, PLD2, SGCE, ALOX5, DMD, PGM5, CD36, NOS1, SCN5A, FLNC, SGCG, ANXA1, VCAM1, KCNJ8, ANXA2, BGN, ABCC9, KRT19, DES, COL6A2, COL6A1, SSPN, ITGA7, PRKCQ, AGRN, SYNC, PDE9A	2252	118	19662	2.73766	1.31047e-05	7.7087e-07	6.97287e-07
GOTERM_CC_DIRECT	GO:0000775	chromosome, centromeric region	1.69348	1.01152e-07	ZWILCH, DSCC1, BUB1B, CDCA8, MKI67, SKA3, CENPA, AURKC, PMF1, AURKB, SKA1, SEPT6, DSN1, SGOL1, MIS18BP1, NUF2, NEK2, OIP5, SPDL1, BUB1, HELLS, CENPW, SPAG5, PLK1, DNMT3A, KNSTRN, NDC80, CENPE, CENPF, CENPH, STAG3, CENPI, INCENP, CENPK, CENPM, BIRC5, KIF2C, CENPN, CENPP, MAD2L1	2252	141	19662	2.47685	6.67579e-05	3.70889e-06	3.35486e-06
GOTERM_CC_DIRECT	GO:0005605	basal lamina	0.550381	1.14518e-07	LAMA5, LAMA2, LAMA1, LAMB2, LAMA4, FN1, LAMB1, LAMC1, NID1, HSPG2, COL4A4, COL4A5, AGRN	2252	19	19662	5.97378	7.55792e-05	3.978e-06	3.59828e-06
GOTERM_CC_DIRECT	GO:0005614	interstitial matrix	0.508044	2.76958e-07	VIT, SMOC2, EGFLAM, CCDC80, ECM2, COL14A1, ADAMTSL4, ABI3BP, MAMDC2, TNC, VWA1, IGF1	2252	17	19662	6.16299	0.000182775	9.1396e-06	8.26719e-06
GOTERM_CC_DIRECT	GO:0072562	blood microparticle	1.56647	5.50905e-07	C1QB, APCS, CFH, SERPINC1, PROS1, HP, TRF, F13A1, HBA-A2, PLG, HBA-A1, KNG1, ACTG2, STOM, APOE, FGB, C1RB, FGA, C1RA, TGFB1, AHSG, SERPINF2, FGG, APOA2, FN1, APOA1, MSN, HBB-BT, APOA4, SERPINA3M, HBB-BS, F2, ALB, SERPING1, ANGPTL4, CFB, C1QC	2252	133	19662	2.4289	0.000363531	1.73141e-05	1.56614e-05
GOTERM_CC_DIRECT	GO:0005901	caveola	1.18544	6.0264e-07	SCARB1, ADCYAP1R1, PLVAP, SLC2A3, PTGS2, CACNA1H, HK1, AQP1, PLD2, S1PR1, PRKCDBP, CD36, NOS1, SCN5A, PTRF, PTGIS, CAV2, CAV1, F2R, EMP2, TGFBR2, EHD2, HCK, KIF18A, SMO, SDPR, DLC1, CDH13	2252	86	19662	2.84262	0.000397663	1.80792e-05	1.63535e-05
GOTERM_CC_DIRECT	GO:0005911	cell-cell junction	2.03218	1.23394e-06	CDCA3, COL13A1, AHNAK, LAMA1, CXCR4, LIN7A, PCDH12, CD3E, ITGAL, IQGAP3, CORO1A, AQP3, MYLK, CDH5, GJA1, PDZD2, FLRT2, FLRT3, 9430020K01RIK, FLNA, CDH24, ECT2, PDLIM7, CD53, CADM3, PRKCH, KIRREL, ANXA2, FZD4, WTIP, VAV1, CD2, P2RX7, CLDN5, ZAP70, VANGL2, FNDC1, PTK7, FABP7, KIT, FSCN1, MYADM, LCP2, ITGA5, TEK, AJUBA, DBN1, ARHGEF6	2252	201	19662	2.08499	0.000814067	3.54086e-05	3.20287e-05
GOTERM_CC_DIRECT	GO:0016324	apical plasma membrane	2.83658	3.25139e-06	ACY3, ITGB3, SLC6A20A, TRF, PTH1R, ATP12A, CLDN1, AQP1, GJA1, UPK1B, SLCO2B1, C1QTNF5, PRKG2, MUC13, CD36, CD34, PDGFRB, CUBN, SLC34A2, AMN, ANXA1, IGFBP2, ABCC6, CYBA, EMP2, MYO7A, PDZK1, OSMR, AJAP1, SLC5A7, CLDN4, CDHR2, BIRC5, DPEP1, CDHR5, DDR2, ABCG2, KCNE4, KCNA1, LRP2, THY1, OTOA, PODXL, P2RY2, PDPN, ERBB2, ATP6V0A4, CD300LG, CD55, GPIHBP1, JAG1, CYP4A31, SLC52A3, FN1, MSN, BST2, DAB2, VA…	2252	328	19662	1.78345	0.00214362	8.94131e-05	8.08782e-05
GOTERM_CC_DIRECT	GO:0000776	kinetochore	1.35478	9.34823e-06	ZWILCH, BUB1B, TTK, SKA3, CENPA, PMF1, AURKB, SKA1, SEPT6, DSN1, SGOL1, NUF2, NEK2, SPDL1, BUB1, CENPW, SPAG5, PLK1, KNSTRN, NDC80, CENPE, KIF18A, CENPF, CENPH, CENPI, INCENP, CENPK, CENPM, BIRC5, KIF2C, CENPN, MAD2L1	2252	120	19662	2.32824	0.00615087	0.000246793	0.000223236
GOTERM_CC_DIRECT	GO:0005577	fibrinogen complex	0.296359	1.41343e-05	FGB, FGA, SERPINF2, FGG, FN1, FBLN1, THBS1	2252	7	19662	8.73091	0.00928535	0.000358795	0.000324546
GOTERM_CC_DIRECT	GO:0071944	cell periphery	0.931414	2.89182e-05	EPHA5, SCARA3, VCAM1, ICAM2, MSN, NID1, THSD1, LYVE1, ACTG2, NKD2, CDH5, GAP43, KRT19, PTPRC, VANGL2, FABP7, KRT14, PECAM1, KDR, NOX4, CD34, RAPGEF3	2252	71	19662	2.70535	0.0189053	0.00070689	0.000639414
GOTERM_CC_DIRECT	GO:0001725	stress fiber	0.889077	3.8412e-05	TMSB15B2, ANXA2, FBLIM1, TPM1, CYBA, MST1R, MYLK, CNN2, PSTPIP1, VANGL2, PDLIM2, ABLIM3, DLC1, FSCN1, ZYX, NOX4, MYH11, PGM5, TEK, MYL9, PDLIM7	2252	67	19662	2.73655	0.0250338	0.000905427	0.000819
GOTERM_CC_DIRECT	GO:0005871	kinesin complex	0.762066	3.99474e-05	KIFC5B, KIF14, KIF23, KIF11, KIF22, KIF7, KIF6, KIF15, KIF4, CENPE, KIF18A, KIF18B, KIF26A, KIFC1, KIF26B, KIF2C, KIF20A, KIF20B	2252	52	19662	3.02224	0.0260213	0.000909148	0.000822366
GOTERM_CC_DIRECT	GO:0008305	integrin complex	0.508044	4.15593e-05	ITGAM, ITGB3, ITGA1, ITGA11, ITGB2, ITGA8, ITGA7, ITGB7, ITGA5, ITGAE, ITGAL, ITGA9	2252	25	19662	4.19083	0.027057	0.000914305	0.000827031
GOTERM_CC_DIRECT	GO:0001527	microfibril	0.338696	5.54404e-05	MFAP5, FBN2, MFAP4, ADAMTSL5, MFAP2, LTBP1, ADAMTS10, FBN1	2252	11	19662	6.34975	0.0359303	0.00118034	0.00106767
GOTERM_CC_DIRECT	GO:0031528	microvillus membrane	0.465707	6.65723e-05	SLC34A2, SCARB1, PODXL, ITGB3, CDHR2, PDPN, MSN, DPEP1, CAR9, CDHR5, PDZK1	2252	22	19662	4.36545	0.0429879	0.00137305	0.00124199
GOTERM_CC_DIRECT	GO:0005921	gap junction	0.550381	0.000172934	GJE1, GJC1, PANX1, GJA1, DES, GJD3, NOV, GJB4, GJA5, GJB6, GJA4, GJB5, DBN1	2252	33	19662	3.43945	0.107872	0.00345867	0.00312853
GOTERM_CC_DIRECT	GO:0045177	apical part of cell	1.18544	0.000198661	IFITM3, GPSM2, C5AR1, MGST1, PLAT, ITPR3, LRP2, AQP1, HSD11B1, PDZD2, INSC, CDH23, ATP6V0A4, CD36, CUBN, CAR2, AMN, JAG1, VCAM1, MSN, EMP2, FAP, ITGA8, DPEP1, DCHS1, FAT4, ACPP, RAPGEF3	2252	115	19662	2.12579	0.122896	0.00385636	0.00348825
GOTERM_CC_DIRECT	GO:0005737	cytoplasm	35.3514	0.00023256	TEX40, AVIL, CLDN1, MYLK, DPYSL4, UBASH3B, DPYSL5, RAVER2, DPYSL3, LRAT, PGLYRP1, GTSE1, PKNOX2, MEF2C, RBP7, AR, RBP2, RBP1, HPD, CDCA2, PARPBP, CDCA3, CRABP2, CDCA5, SHMT1, CRABP1, PDGFB, CDCA7, CDCA8, NCAPG, IQGAP3, NCAPH, HSD11B1, HSD11B2, FIGNL1, LYN, STFA2, LARP6, AIF1L, STFA3, COL1A1, FAM111A, MOV10, BHMT, MRVI1, EZH2, QPRT, PTH1R, ARHGAP4, M1AP, HEY2, MMP28, NEFL, DLGAP5, RIPK3, DUSP1, SP…	2252	6631	19662	1.09943	0.142306	0.00438542	0.00396681
GOTERM_CC_DIRECT	GO:1903561	extracellular vesicle	0.677392	0.000256432	FGB, FGA, SERPINE2, COL12A1, ITGB2, APOA1, PRELP, FBLN2, LFNG, OLFML3, COL6A2, OGN, CD9, APOE, MFGE8, GRIA4	2252	49	19662	2.85091	0.155716	0.00470125	0.00425249
GOTERM_CC_DIRECT	GO:0034364	high-density lipoprotein particle	0.42337	0.000269213	APOM, LIPC, SAA3, APOH, APOC4, APOA2, APOA1, APOA4, APOE, GPIHBP1	2252	21	19662	4.15757	0.16281	0.00480217	0.00434379
GOTERM_CC_DIRECT	GO:0030027	lamellipodium	1.4818	0.000413543	PLXND1, DYSF, STMN2, GDPD2, AIF1, CORO1A, ACTG2, MYLK, AMOT, PLD2, PSTPIP1, ABLIM3, PODXL, PDPN, DPYSL3, IGF2BP1, RAC2, SWAP70, ARAP3, TIAM2, ACTA2, APBB1IP, ARHGAP31, FAP, KITL, ABI3, TRPV4, FSCN1, ANGPTL3, AJUBA, DBN1, RAPGEF3, EPHA2, MYO1G, ARHGEF6	2252	164	19662	1.8633	0.238903	0.00718259	0.00649698
GOTERM_CC_DIRECT	GO:0005667	transcription factor complex	2.11685	0.0005614	SPI1, LDB2, IKZF1, ETS1, SOX17, HEY2, PITX2, SOX6, JUNB, TEAD4, FOXD3, LMO4, LMO2, PAX4, FOS, TAL1, HAND2, HCLS1, AJUBA, YAP1, EPAS1, TCF7, GATA6, TWIST2, GATA5, GATA3, GATA2, PDLIM1, GSC, E2F3, MSX1, ZFP541, E2F7, E2F8, WWTR1, TCF7L1, JUN, FOXF2, WTIP, KLF4, SMAD6, TBX3, TBX2, NFATC4, HEYL, NR4A1, GFI1B, MAFB, NR4A3, CDK2	2252	267	19662	1.635	0.309699	0.00950061	0.00859373
GOTERM_CC_DIRECT	GO:0034361	very-low-density lipoprotein particle	0.381033	0.000686282	APOM, APOC2, APOH, APOC4, APOA2, APOC3, APOA1, APOA4, APOE	2252	19	19662	4.13569	0.364346	0.0110475	0.00999293
GOTERM_CC_DIRECT	GO:0051233	spindle midzone	0.381033	0.000686282	PLK1, KIF14, CDCA8, CDC6, KIF20B, AURKC, GEM, AURKB, AURKA	2252	19	19662	4.13569	0.364346	0.0110475	0.00999293
GOTERM_CC_DIRECT	GO:0031091	platelet alpha granule	0.338696	0.000712743	FGB, FGA, SPARC, SERPINE2, FGG, THBS2, THBS1, PF4	2252	15	19662	4.65648	0.375359	0.0112002	0.0101311
GOTERM_CC_DIRECT	GO:0031838	haptoglobin-hemoglobin complex	0.211685	0.000778552	HP, HBA-A2, HBB-BT, HBA-A1, HBB-BS	2252	5	19662	8.73091	0.401928	0.0116783	0.0105635
GOTERM_CC_DIRECT	GO:0032133	chromosome passenger complex	0.211685	0.000778552	CDCA8, BIRC5, AURKC, AURKB, AURKA	2252	5	19662	8.73091	0.401928	0.0116783	0.0105635
GOTERM_CC_DIRECT	GO:0031232	extrinsic component of external side of plasma membrane	0.254022	0.000813319	FCNA, ANXA1, SERPINE2, TRF, PLG, APOE	2252	8	19662	6.54818	0.415506	0.0119287	0.01079
GOTERM_CC_DIRECT	GO:0005922	connexon complex	0.381033	0.00102969	GJC1, GJA1, GJD3, GJB4, GJA5, GJB6, GJA4, GJB5, GJE1	2252	20	19662	3.92891	0.493354	0.0147738	0.0133635
GOTERM_CC_DIRECT	GO:0005876	spindle microtubule	0.550381	0.00127039	SPAG5, PLK1, KIF11, SKA3, AURKC, SKA1, AURKB, AURKA, TPX2, CAPN6, NUSAP1, CDK1, BIRC5	2252	40	19662	2.83754	0.567855	0.0178396	0.0161367
GOTERM_CC_DIRECT	GO:0000940	condensed chromosome outer kinetochore	0.254022	0.00165731	CENPE, CENPF, BUB1B, SPDL1, SKA3, SKA1	2252	9	19662	5.8206	0.66537	0.022788	0.0206127
GOTERM_CC_DIRECT	GO:0000922	spindle pole	1.01609	0.00178498	RGS14, SPAG5, CKAP2L, PLK1, CKAP2, KIF11, CDC6, KNSTRN, CDC25B, CDC20, TPX2, ASPM, CENPF, DSN1, CCNB1, LATS2, SGOL1, HAUS8, PRC1, POC1A, NEK2, AUNIP, SPDL1, MAD2L1	2252	106	19662	1.97681	0.692456	0.0238831	0.0216033
GOTERM_CC_DIRECT	GO:0072686	mitotic spindle	0.592718	0.00184939	SPAG5, KIFC5B, KIF23, CAPG, KIF11, KIF22, KNSTRN, GEM, AURKA, ESPL1, KIFC1, CDK1, ECT2, MAD2L1	2252	47	19662	2.6007	0.705279	0.0238831	0.0216033
GOTERM_CC_DIRECT	GO:0042627	chylomicron	0.296359	0.00187714	APOC2, APOH, APOA2, APOC3, APOA1, APOA4, APOE	2252	13	19662	4.70126	0.710638	0.0238831	0.0216033
GOTERM_CC_DIRECT	GO:0031594	neuromuscular junction	0.719729	0.0018817	GRIA1, EPHA4, POSTN, SERPINE2, F2R, PTN, SYNGR4, THBS4, COLQ, P2RX7, DES, EFNA2, DOK7, ITGA7, COL4A5, PRKCQ, SYNC	2252	64	19662	2.31915	0.711509	0.0238831	0.0216033
GOTERM_CC_DIRECT	GO:0005587	collagen type IV trimer	0.211685	0.00212296	COL4A2, COL4A1, COL4A4, COL4A6, COL4A5	2252	6	19662	7.27575	0.754054	0.0264369	0.0239134
GOTERM_CC_DIRECT	GO:0005856	cytoskeleton	6.73158	0.00225609	WIPF1, AVIL, CCNF, ACTG2, MYLK, CDC20, TUBB6, TUBB5, CAPN6, STMN1, NUSAP1, COTL1, NEK2, FBXO5, GTSE1, GAS2L3, SWAP70, TPM2, TPM1, MYO7B, AFAP1, MYO7A, KNSTRN, CDC25B, ARC, FRMD6, FSCN1, KIF20A, KIF20B, TRIB2, AJUBA, S100A9, S100A8, RAI14, MTAP7D3, FBLIM1, CDCA8, SKA3, CORO1A, EVPL, SKA1, CNN2, CNN1, CCNB1, MICAL1, INPP5D, ZFP185, CEP72, TPPP, ECT2, FAM83D, STIL, CCDC13, PLK1, MSN, AIF1L, ANLN, TP…	2252	1113	19662	1.24727	0.774786	0.0274146	0.0247978
GOTERM_CC_DIRECT	GO:0030175	filopodium	0.804403	0.00228455	EPHA4, VCAM1, MSN, ACTG2, TIAM2, ARL4C, ACTA2, PODXL, KITL, TRPV4, PDPN, IGF2BP1, FSCN1, DMD, CD302, ACPP, DBN1, RAPGEF3, MYO1G	2252	77	19662	2.15438	0.778986	0.0274146	0.0247978
GOTERM_CC_DIRECT	GO:0043235	receptor complex	1.18544	0.00237844	NOTCH3, GABRB1, ADCYAP1R1, RAMP3, FLT1, LRP1, ITGB3, FLT4, ITGB2, LRP5, ITLN1, GPR20, LOXL4, ITPR3, LRP2, PTH1R, ERBB2, OLR1, ITGB7, PLXDC1, TGFBR2, CD200R1, PTPRB, P2RX2, TLR7, PLA2R1, FGFR1, ENG	2252	134	19662	1.82437	0.792295	0.0280316	0.0253558
GOTERM_CC_DIRECT	GO:0043234	protein complex	4.06435	0.00270288	TOP2A, RYR1, GUCY1B3, RYR2, FLT3, PROS1, HMGB2, BRCA1, IKZF1, BRCA2, HK1, PANX1, CDC20, HK3, CHAF1B, TUBB5, CHAF1A, DPYSL5, MYC, NEK2, CD36, NOS1, PTRF, RGS6, GUCY1A3, PDGFRA, CUBN, AMN, MEF2C, ANXA1, ANXA2, KSR1, AHSG, LMO2, NOG, TPM1, UGT1A6A, MMP9, UGT1A6B, ACTA2, AR, INCENP, TAL1, HAND2, COL6A2, COL6A1, CD48, DGKI, LTF, ASF1B, CRB2, GRIA1, APCS, NLRP1A, ZFP703, DOT1L, PELI2, ADCY4, NRXN2, CDC…	2252	628	19662	1.33466	0.832424	0.0312569	0.0282733
GOTERM_CC_DIRECT	GO:0046658	anchored component of plasma membrane	0.508044	0.00274682	CD2, NTNG1, RAET1D, NRN1, GPC3, GAS1, CD48, RTN4RL2, THY1, ULBP1, MDGA1, GPIHBP1	2252	38	19662	2.75713	0.837226	0.0312569	0.0282733
GOTERM_CC_DIRECT	GO:0031616	spindle pole centrosome	0.296359	0.0029687	KIFC1, KIFC5B, BNIP2, AURKC, DLGAP5, AURKB, AURKA	2252	14	19662	4.36545	0.859459	0.0332092	0.0300393
GOTERM_CC_DIRECT	GO:0030496	midbody	1.1431	0.00314981	KIF14, CDCA8, KLHL13, AURKC, AURKB, SEPT6, NEK2, ECT2, CEP55, ANXA2, SPAG5, PLK1, SEPT1, KIF23, SHCBP1, GEM, KIF4, CENPE, ASPM, CENPF, PRC1, INCENP, CHMP4C, CDK1, BIRC5, KIF20A, KIF20B	2252	130	19662	1.81334	0.875338	0.0346479	0.0313406
GOTERM_CC_DIRECT	GO:0005884	actin filament	0.719729	0.00364368	WIPF1, LMOD1, GDPD2, AFAP1, AIF1, CORO1A, AIF1L, AMOT, HCK, INPP5D, DLC1, RAC2, FLNA, ACKR2, TEK, DBN1, GAS7	2252	68	19662	2.18273	0.910115	0.0394234	0.0356602
GOTERM_CC_DIRECT	GO:0001772	immunological synapse	0.465707	0.00372547	CD53, LGALS3, ZAP70, CD28, RHOH, PRKCQ, CD37, CD3E, ITGAL, CORO1A, ICAM1	2252	34	19662	2.8247	0.914855	0.0396583	0.0358727
GOTERM_CC_DIRECT	GO:0000778	condensed nuclear chromosome kinetochore	0.211685	0.0045044	CENPE, MIS18BP1, BUB1B, CENPA, NDC80	2252	7	19662	6.23636	0.949188	0.047189	0.0426846
GOTERM_CC_DIRECT	GO:0000942	condensed nuclear chromosome outer kinetochore	0.169348	0.00548087	CCNB1, PLK1, BUB1, NDC80	2252	4	19662	8.73091	0.973413	0.0556519	0.0503397
GOTERM_CC_DIRECT	GO:0071953	elastic fiber	0.169348	0.00548087	MFAP4, ELN, FBLN1, FBLN5	2252	4	19662	8.73091	0.973413	0.0556519	0.0503397
GOTERM_CC_DIRECT	GO:0005819	spindle	1.01609	0.00587992	MTAP7D3, RGS14, DYNLT1B, SPAG5, PLK1, DYNLT1A, KIF23, KIF11, KIF22, CDC6, SHCBP1, AURKB, KIF15, AURKA, TPX2, CENPF, SEPT6, PRC1, INCENP, MYC, GSG2, NUSAP1, FBXO5, KIF20A	2252	116	19662	1.80639	0.9796	0.0587992	0.0531865
GOTERM_CC_DIRECT	GO:0000777	condensed chromosome kinetochore	0.804403	0.00612471	CENPW, SPAG5, ZWILCH, BUB1B, KNSTRN, NDC80, SEPT6, SGOL1, CENPH, INCENP, NUF2, CENPK, CENPM, BIRC5, KIF2C, NEK2, CENPN, BUB1, MAD2L1	2252	84	19662	1.97485	0.98266	0.0603329	0.0545739
GOTERM_CC_DIRECT	GO:0030018	Z disc	1.05843	0.0067841	RYR1, RYR2, SYNM, FHL2, NEXN, KCNA5, PYGM, ADRA1A, JPH1, PDLIM3, JPH2, DMD, PGM5, NOS1, SCN5A, FLNC, ACTN3, KRT19, OBSCN, DES, HRC, MYZAP, SYNC, CRYAB, MYL9	2252	124	19662	1.76026	0.98881	0.0658457	0.0595604
GOTERM_CC_DIRECT	GO:0032587	ruffle membrane	0.762066	0.00727103	KSR1, ITGB3, TPM1, RASGRP2, BMX, AIF1, AIF1L, FGR, FGD5, FAP, TRPV4, DLC1, PDPN, SPRY2, PLEKHO1, ITGA5, PDE9A, EPHA2	2252	79	19662	1.98932	0.991904	0.069549	0.0629102
GOTERM_CC_DIRECT	GO:0034366	spherical high-density lipoprotein particle	0.211685	0.00819549	APOM, APOC2, APOA2, APOC3, APOA1	2252	8	19662	5.45682	0.995623	0.0772717	0.0698958
GOTERM_CC_DIRECT	GO:0005902	microvillus	0.719729	0.0111758	AOC3, PDGFRA, CAR2, TGFB1, VCAM1, LYZ2, MYO7B, MSN, MYO7A, FABP2, LIPC, ERBB2, FSCN1, TEK, CD302, RAPGEF3, MYO1G	2252	76	19662	1.95297	0.999399	0.103888	0.0939711
GOTERM_CC_DIRECT	GO:0000780	condensed nuclear chromosome, centromeric region	0.296359	0.0122754	SGOL1, PLK1, CENPA, AURKC, BUB1, AURKB, AURKA	2252	18	19662	3.39535	0.999712	0.110983	0.100389
GOTERM_CC_DIRECT	GO:0031527	filopodium membrane	0.296359	0.0122754	GAP43, ITGB3, PDPN, TBC1D10C, MSN, DMD, ANTXR1	2252	18	19662	3.39535	0.999712	0.110983	0.100389
GOTERM_CC_DIRECT	GO:0030485	smooth muscle contractile fiber	0.169348	0.0125344	ACTA2, PECAM1, MYH11, NPNT	2252	5	19662	6.98472	0.999758	0.111793	0.101122
GOTERM_CC_DIRECT	GO:0015629	actin cytoskeleton	1.4818	0.01278	MTAP7D3, NOTCH3, CLIC5, AHNAK, WIPF1, HSPB7, FHL2, NCAPG, CORO1A, FYB, BAIAP2L2, PDLIM3, PDLIM2, CSRP1, ZFP185, FLNA, BMF, FLNC, SLC16A3, PDLIM7, PKNOX2, NFE2, GAS2L3, DENND2A, CIT, AIF1L, ACTA2, FGR, ANLN, SMTN, ARC, STK17B, FSCN1, DBN1, RAI14	2252	201	19662	1.52031	0.999794	0.112464	0.101729
GOTERM_CC_DIRECT	GO:0072687	meiotic spindle	0.211685	0.013426	ASPM, BORA, SHCBP1L, SEPT1, AURKA	2252	9	19662	4.8505	0.999866	0.116595	0.105465
GOTERM_CC_DIRECT	GO:0043025	neuronal cell body	3.34462	0.014112	CHRM2, ACVRL1, NRP1, NRSN2, NCF1, SERPINE2, STMN2, HTR2B, MPL, SLC7A10, NRGN, HTR7, DPYSL5, BOC, KDR, TIMP2, EPHB2, EPHA5, ANXA3, SERPINF1, CYBA, HTR3A, KCNAB1, TNFRSF1B, GIP, CIT, SLC5A7, SMO, NOV, NAIP6, DBN1, DGKI, RAPGEF3, GRIA1, CHRNA3, NLRP1A, LRP1, TMPRSS5, CHRNA4, PDE1A, SDC2, HDC, KCNA1, LPAR1, PDGFB, ITPR3, NTS, LTBP1, CYGB, CACNA1G, CYP17A1, BEGAIN, CRHR2, BRINP1, RELN, TBX21, FLNA, CC…	2252	534	19662	1.29165	0.999916	0.12096	0.109414
GOTERM_CC_DIRECT	GO:0005694	chromosome	2.2862	0.0151174	ZWILCH, HMGB2, BUB1B, HMGB3, BRCA1, MKI67, SMC2, SEPT6, SGOL1, MIS18BP1, GSG2, NUF2, NUSAP1, NEK2, OIP5, SPDL1, HIST1H1A, HIST1H1B, ESCO2, KNSTRN, KIF4, INCENP, DMC1, BIRC5, KIF2C, DTL, CDCA2, CDCA5, CDCA8, SKA3, AURKC, CENPA, PMF1, AURKB, SKA1, NCAPH, DSN1, CLSPN, BUB1, IL33, CENPW, SPAG5, PLK1, NDC80, CENPE, CENPH, STAG3, CENPI, CENPK, CENPM, CENPN, CENPP, MAD2L1, EZH2	2252	344	19662	1.37055	0.999957	0.127917	0.115707
GOTERM_CC_DIRECT	GO:0005769	early endosome	1.60881	0.0159707	GRIA1, NRP1, DYSF, FAM109B, TRF, CXCR4, CORO1A, NEURL1B, GJA1, FGD5, CD1D1, LIPC, BLOC1S1, P2RY2, LIPG, KDR, APOE, AOC3, VCAM1, ANXA2, ST8SIA2, ARRDC3, F2R, KIFC5B, 2610528J11RIK, RHOD, RAB32, SLC5A7, RAB31, KIFC1, ANGPTL3, ACKR4, ACKR3, ACKR2, RIN3, RAB38, ASTN2, EPHA3	2252	226	19662	1.46803	0.999976	0.133426	0.12069
GOTERM_CC_DIRECT	GO:0031258	lamellipodium membrane	0.296359	0.0162368	FAP, ITGB3, PDPN, PIEZO1, CSPG4, ANTXR1, EPHA2	2252	19	19662	3.21665	0.99998	0.133953	0.121167
GOTERM_CC_DIRECT	GO:0000793	condensed chromosome	0.381033	0.0169083	TOP2A, RAD51, CDK2, HMGB2, NCAPG, BRCA1, MKI67, AURKC, SMC2	2252	30	19662	2.61927	0.999987	0.137771	0.12462
GOTERM_CC_DIRECT	GO:0009925	basal plasma membrane	0.465707	0.0179387	CLDN4, ACE, SLCO2B1, CAV1, ERBB2, TRF, TEK, CD34, RAPGEF3, ITGA9, AQP1	2252	42	19662	2.28667	0.999994	0.144384	0.130602
GOTERM_CC_DIRECT	GO:0001891	phagocytic cup	0.296359	0.0209985	ANXA1, BIN2, PEAR1, CORO1A, TNF, AIF1, MYO1G	2252	20	19662	3.05582	0.999999	0.166976	0.151038
GOTERM_CC_DIRECT	GO:0061702	inflammasome complex	0.169348	0.0229458	GSDMD, NLRP1A, NLRP6, NLRP3	2252	6	19662	5.8206	1	0.180288	0.163079
GOTERM_CC_DIRECT	GO:0031526	brush border membrane	0.635055	0.0258072	CUBN, SLC34A2, AMN, ACE, ITLN1, LRP2, PDZK1, PTH1R, AQP1, PLD2, CDHR2, CDHR5, ATP6V0A4, CD36, RAPGEF3	2252	70	19662	1.87091	1	0.198739	0.179768
GOTERM_CC_DIRECT	GO:0030315	T-tubule	0.550381	0.0258963	RYR1, AHNAK, STAC, TGFB3, DYSF, MSN, ABCC9, SLC2A4, ADRA1B, ADRA1A, EDNRA, NOS1, SCN5A	2252	57	19662	1.99126	1	0.198739	0.179768
GOTERM_CC_DIRECT	GO:0005796	Golgi lumen	0.296359	0.0266219	SDC2, GPC3, SDC1, GPC2, AGRN, SOD3, HSPG2	2252	21	19662	2.9103	1	0.201959	0.182681
GOTERM_CC_DIRECT	GO:0042629	mast cell granule	0.296359	0.0331589	SRGN, LYN, ANXA1, NR4A3, KIT, BTK, TPSAB1	2252	22	19662	2.77802	1	0.244519	0.221178
GOTERM_CC_DIRECT	GO:0048471	perinuclear region of cytoplasm	4.06435	0.0337292	DOCK6, PLVAP, HMGB2, STMN2, TRF, BUB1B, SLC2A4, CTGF, TMEM100, CDC20, PSTPIP1, CAPN6, HEPH, MYC, STBD1, NCS1, LRAT, ENPP3, NOS1, CD34, EPHA5, DGAT2, ANXA2, SERPINF1, PLA2G4A, MMD2, TNFRSF1B, TMEM173, CDC25C, TRAIP, ARHGAP10, PLA2G16, INF2, TRAF4, ALDH1A2, MCM3, BTK, S100A6, CDH13, AGTR2, KIF20B, ZP3, SYNC, DBN1, PDE9A, DGKI, RAPGEF3, CHODL, CX3CR1, 2810417H13RIK, LRP1, PKN3, ITPR3, KCNA5, PTN, ND…	2252	692	19662	1.21122	1	0.244519	0.221178
GOTERM_CC_DIRECT	GO:0005606	laminin-1 complex	0.127011	0.0363073	LAMA1, LAMB1, LAMC1	2252	3	19662	8.73091	1	0.244519	0.221178
GOTERM_CC_DIRECT	GO:0034365	discoidal high-density lipoprotein particle	0.127011	0.0363073	APOM, APOA1, APOE	2252	3	19662	8.73091	1	0.244519	0.221178
GOTERM_CC_DIRECT	GO:0071133	alpha9-beta1 integrin-ADAM8 complex	0.127011	0.0363073	ITGB3, ADAM8, ITGA9	2252	3	19662	8.73091	1	0.244519	0.221178
GOTERM_CC_DIRECT	GO:0043259	laminin-10 complex	0.127011	0.0363073	LAMA5, LAMB1, LAMC1	2252	3	19662	8.73091	1	0.244519	0.221178
GOTERM_CC_DIRECT	GO:0005594	collagen type IX trimer	0.127011	0.0363073	COL9A1, COL9A3, COL9A2	2252	3	19662	8.73091	1	0.244519	0.221178
GOTERM_CC_DIRECT	GO:0030666	endocytic vesicle membrane	0.127011	0.0363073	CUBN, SCARA5, SMO	2252	3	19662	8.73091	1	0.244519	0.221178
GOTERM_CC_DIRECT	GO:0030055	cell-substrate junction	0.127011	0.0363073	PGM5, DMD, TNS1	2252	3	19662	8.73091	1	0.244519	0.221178
GOTERM_CC_DIRECT	GO:0043256	laminin complex	0.127011	0.0363073	LAMA1, LAMB2, LAMB1	2252	3	19662	8.73091	1	0.244519	0.221178
GOTERM_CC_DIRECT	GO:0005588	collagen type V trimer	0.127011	0.0363073	COL5A1, COL5A3, COL5A2	2252	3	19662	8.73091	1	0.244519	0.221178
GOTERM_CC_DIRECT	GO:0000800	lateral element	0.254022	0.0372985	BLM, RAD51, STAG3, INCENP, BRCA1, BRCA2	2252	17	19662	3.0815	1	0.248656	0.224921
GOTERM_CC_DIRECT	GO:0016328	lateral plasma membrane	0.508044	0.0399377	GJA1, CLDN4, VANGL2, ANXA1, CLDN15, CLDN13, C1QTNF5, ABCC6, NSG1, IQGAP3, CLDN1, NKD2	2252	54	19662	1.9402	1	0.261268	0.236328
GOTERM_CC_DIRECT	GO:0030425	dendrite	2.96359	0.0399818	CHRM2, ACVRL1, GABRB1, NCF1, HTR2B, GRIK3, ELFN1, NRGN, SGCE, GRM2, HTR7, DPYSL5, NCS1, NOS1, EPHB2, EPHB1, EPHB3, EPHA5, EPHA4, LYNX1, ARHGEF15, ANXA3, CYBA, PRSS12, AGTR1A, AR, SLC5A7, SMO, NOV, FSCN1, GRIA1, CHRNA3, LRP1, RGS14, KCNE3, CHRNA4, HDC, KCNA1, SEMA3A, PDGFB, ADCY4, ITPR3, ADCY2, THY1, LTBP1, IGSF9, CACNA1H, CACNA1G, BEGAIN, CRHR2, GNG3, BRINP1, RELN, ALOX5, IGF2BP1, CCL2, APOE, BRI…	2252	490	19662	1.24727	1	0.261268	0.236328
GOTERM_CC_DIRECT	GO:0001726	ruffle	0.762066	0.0407145	ANXA2, WIPF1, LAYN, ARAP3, S100B, AIF1, SAMSN1, CIT, AMOT, KIF18A, PODXL, PDPN, MYADM, FSCN1, S100A6, PECAM1, PDLIM7, GAS7	2252	95	19662	1.65428	1	0.263447	0.2383
GOTERM_CC_DIRECT	GO:0030139	endocytic vesicle	0.508044	0.0449541	CUBN, AMN, KIFC1, KIFC5B, FFAR4, DYSF, LPAR1, CCL2, TRF, APOA1, LRP2, AMOT	2252	55	19662	1.90492	1	0.288056	0.260559
GOTERM_CC_DIRECT	GO:0045211	postsynaptic membrane	1.4818	0.0474649	GRIA1, CHRM2, GABRB2, GABRB1, CHRNA3, PRR7, RGS14, COL13A1, CHRNA4, GRIK3, LIN7A, GRM2, LRRTM3, NCS1, ERBB2, DMD, LRRC4C, GRIA3, GRIA4, CACNG5, EPHA4, GABRA1, GRID2, CHRNB4, SEMA4C, PCDH8, F2R, HTR3A, NSG1, GRIN2C, ARC, GRIN3A, SSPN, CNIH2, DBN1	2252	222	19662	1.37649	1	0.301219	0.272467
GOTERM_CC_DIRECT	GO:0042995	cell projection	4.10669	0.0487018	WIPF1, AVIL, STMN2, ANTXR1, MYLK, BASP1, GJA5, DPYSL3, PIEZO1, CAR9, EPHB2, EPHB1, EPHB3, EPHA5, EPHA4, SWAP70, MYO7B, SHISA9, TIAM2, ARC, SMO, BIN2, FSCN1, DPEP1, KIF20B, PDE9A, EPHA2, GRIA1, KCNE3, NDRG2, RASGRP2, SAMSN1, FLRT3, PODXL, GRIA4, AFAP1L1, CCDC13, MSN, AIF1L, ARHGAP31, KIF18A, KITL, TRPV4, CSPG4, CNIH2, FERMT3, ITGB3, ELFN1, GLI3, NRGN, SGCE, GRM2, PSTPIP1, MDK, C1QTNF5, SH3PXD2B, N…	2252	712	19662	1.18946	1	0.306125	0.276904
GOTERM_CC_DIRECT	GO:0030864	cortical actin cytoskeleton	0.42337	0.0514972	CLDN5, PDLIM2, DLC1, TRPV4, MYADM, MYZAP, CORO1A, RAPGEF3, MYO1F, CAP2	2252	43	19662	2.03044	1	0.320643	0.290036
GOTERM_CC_DIRECT	GO:0016010	dystrophin-associated glycoprotein complex	0.211685	0.0525159	SGCE, KRT19, SSPN, PGM5, DMD	2252	13	19662	3.35804	1	0.32093	0.290296
GOTERM_CC_DIRECT	GO:0097431	mitotic spindle pole	0.211685	0.0525159	GPSM2, ASPM, KIF20B, FAM83D, AURKB	2252	13	19662	3.35804	1	0.32093	0.290296
GOTERM_CC_DIRECT	GO:0030314	junctional membrane complex	0.169348	0.0539255	JPH4, RYR1, JPH2, JPH1	2252	8	19662	4.36545	1	0.326522	0.295354
GOTERM_CC_DIRECT	GO:0030133	transport vesicle	0.550381	0.0573879	CPA3, IL33, NRSN2, GALNT15, CAV2, 1500015O10RIK, BGN, NTS, FGFRL1, HCK, C1QTNF5, SSPN, SIPA1	2252	64	19662	1.77347	1	0.344328	0.31146
GOTERM_CC_DIRECT	GO:0016023	cytoplasmic, membrane-bounded vesicle	1.05843	0.0602378	IFITM3, NRSN2, RGS19, WIPF1, KCNA1, C5AR1, OPRL1, TRF, CXCR4, NKD2, NTF3, KDR, SLC39A2, PHLDA1, PDGFRB, CD93, PLA2G4A, NGF, ARHGAP30, FES, MALL, ACSBG1, RIN3, FGFR2, FGFR1	2252	151	19662	1.44551	1	0.358171	0.323982
GOTERM_CC_DIRECT	GO:0005938	cell cortex	1.01609	0.0619021	FGB, RYR1, FGA, GPSM2, RGS19, ANXA2, FBLIM1, CAV1, FGG, CRIP2, MYO7A, FGF1, CTGF, MARCKS, MELK, BIN2, INSC, FLNA, HMCN1, CD302, ASTN2, DBN1, FGFR2, RAI14	2252	144	19662	1.45515	1	0.36478	0.32996
GOTERM_CC_DIRECT	GO:0030424	axon	2.24386	0.0674141	NRP1, NRP2, AVIL, STMN2, GRIK3, NRGN, AQP1, GRM2, MYC, NCS1, BOC, NEFL, EPHB2, EPHB1, EPHA5, EPHA4, PDGFRA, SLC38A1, SEMA6A, ANXA3, SPHK1, SERPINF1, HTR3A, KCNAB1, TNFRSF1B, PRSS12, AR, SLC5A7, GAP43, NOV, KIF20B, CRYAB, MGLL, KCNA1, SEMA3A, HPCA, KCNA3, CORO1A, IGSF9, CYP17A1, CRHR2, RELN, CNR1, IGF2BP1, PRPH, CAR2, TGFB2, TGFB1, IRX3, PDE2A, GHRL, VIM, KCNK2	2252	370	19662	1.25064	1	0.393746	0.356161
GOTERM_CC_DIRECT	GO:0016459	myosin complex	0.465707	0.0680829	MYL4, MYO7B, MYH8, BMF, MYH11, MYO7A, MYO1H, MYL9, CCDC102A, MYO1F, MYO1G	2252	52	19662	1.84692	1	0.394164	0.35654
GOTERM_CC_DIRECT	GO:0042555	MCM complex	0.169348	0.0741753	MMS22L, MCM3, MCM5, MCM6	2252	9	19662	3.8804	1	0.418425	0.378484
GOTERM_CC_DIRECT	GO:0043020	NADPH oxidase complex	0.169348	0.0741753	NCF1, NCF4, NOX4, CYBA	2252	9	19662	3.8804	1	0.418425	0.378484
GOTERM_CC_DIRECT	GO:0002116	semaphorin receptor complex	0.169348	0.0741753	PLXND1, PLXNB3, PLXNC1, PLXNA4	2252	9	19662	3.8804	1	0.418425	0.378484
GOTERM_CC_DIRECT	GO:0010369	chromocenter	0.211685	0.0834794	INCENP, CDCA8, OIP5, ESCO2, AURKB	2252	15	19662	2.9103	1	0.456499	0.412924
GOTERM_CC_DIRECT	GO:0044798	nuclear transcription factor complex	0.211685	0.0834794	SOX17, SOX18, SOX8, KLF4, SOX5	2252	15	19662	2.9103	1	0.456499	0.412924
GOTERM_CC_DIRECT	GO:0005639	integral component of nuclear inner membrane	0.211685	0.0834794	P2RX7, P2RX6, P2RX5, ANKLE1, P2RX2	2252	15	19662	2.9103	1	0.456499	0.412924
GOTERM_CC_DIRECT	GO:0031234	extrinsic component of cytoplasmic side of plasma membrane	0.550381	0.0836915	LYN, RYR1, RYR2, CAV2, KCNAB1, BMX, FGR, ZAP70, HCK, FES, BTK, S100A6, MYZAP	2252	68	19662	1.66914	1	0.456499	0.412924
GOTERM_CC_DIRECT	GO:0016323	basolateral plasma membrane	1.31245	0.0860681	HPGD, C5AR1, PDGFB, LIN7A, PTH1R, NOD2, ATP12A, AQP3, NKD2, AQP1, HEPH, P2RY2, ERBB2, CAR9, CD300LG, GPIHBP1, SLC14A1, CAR2, ANXA1, ANXA2, SLC10A1, ABCC6, MSN, AGTR1A, AGTR1B, AJAP1, VANGL2, SLC26A7, TEK, SLC22A8, CDH17	2252	203	19662	1.33329	1	0.465615	0.421169

## Sheet: UP_CC_T1D_vs_Healthy
#Upregulated GO enrichemnt in T1D vs Healthy Adult Group
#Cellular Component
Category	ID	Term	%	PValue	Genes	List Total	Pop Hits	Pop Total	Fold Enrichment	Bonferroni	Benjamini	FDR
GOTERM_CC_DIRECT	GO:0009897	external side of plasma membrane	8.68347	1.80316e-28	CD86, CXCL9, CD40, ITGAM, CD83, CD80, H2-K1, LY75, ITGAL, ANTXR2, ICAM1, SPN, LGALS3, KLRB1B, ITGAX, CCR7, CCR5, B2M, CTSB, FGB, LAG3, FCER1G, ICOSL, TGFBR2, FCGR1, ADAM19, FCGR3, CD200R1, FCGR4, CD48, LY6A, MFGE8, CD44, H2-D1, TLR2, CD274, H2-M3, CXCR4, IL2RG, CD79B, BTLA, SLAMF7, TNFRSF14, IL12RB1, CCR1, CD74, VCAM1, TNFSF13, H2-AA, DLK1, P2RX7, CXCL10, CD4, PTPRC, SELL, FAS, PDCD1, CD69, FCGR2…	680	317	19662	5.65524	6.34712e-26	6.34712e-26	5.73405e-26
GOTERM_CC_DIRECT	GO:0016020	membrane	52.8011	5.0421e-27	TRAF3IP3, TMEM200A, CLEC10A, LST1, ANTXR2, GM12185, ICAM1, IL27RA, LGALS3, TNFSF10, C3AR1, IL12B, THSD7A, CPNE2, B2M, CMKLR1, GBP6, ARRDC4, GBP5, IL15RA, RSAD2, SLC11A1, CH25H, IGTP, BTK, PSME2, ATP6V0D2, H2-D1, IGSF6, GYPC, RRAD, SLC22A2, PDGFB, TMTC1, TAPBPL, FPR2, LY9, PIK3R6, PIK3R5, MNDAL, CD79B, INPP5D, SLAMF9, TSPAN4, PLCG2, SLAMF8, SLAMF7, ST8SIA6, B4GALNT1, SLAMF6, NCKAP1L, GM5431, GPM6B…	680	6998	19662	1.55771	1.77482e-24	8.87409e-25	8.01694e-25
GOTERM_CC_DIRECT	GO:0009986	cell surface	10.5042	1.15299e-20	ACVRL1, CD86, H2-T23, CD40, CIITA, ITGAM, CD80, ITGB2, H2-K1, ITGAL, ANTXR2, CTSS, ICAM1, SPN, LGALS3, MMP25, CLEC5A, LIPG, MRC1, ITGAX, CD38, CCR7, CCR6, CCR5, HAVCR2, CTSB, FGB, CD53, FCER1G, ANXA1, TNFRSF12A, NFAM1, SLC11A1, TGFBR2, IL1A, TYROBP, ADORA2B, FCGR4, TLR3, CD44, H2-D1, TLR2, CSF1R, CD274, CLEC12A, H2-M2, H2-DMA, H2-Q6, H2-Q7, C5AR1, PDGFB, SLC1A3, CXCR4, H2-Q2, NOD2, H2-Q1, LY9, TS…	680	629	19662	3.4477	4.05852e-18	1.35284e-18	1.22217e-18
GOTERM_CC_DIRECT	GO:0070062	extracellular exosome	22.6891	3.34319e-13	CD86, IL1RN, STEAP4, GDA, H2-K1, LY75, ICAM1, TGM1, C4B, LGALS3, TUBB6, BASP1, ARHGDIB, C1RL, TNFSF10, THSD7A, CPNE2, PGLYRP1, B2M, TGM2, PHLDA3, GBP6, SLC38A1, CD300A, RNASE6, SHISA5, NCCRP1, FCGR3, RBP4, FCGR4, FSCN1, HIST1H2BF, PSME1, CD300E, SERPING1, PSME2, AMY1, ATP6V0D2, CFB, H2-D1, CARD11, CD274, SLC22A2, LYZ2, HTRA1, CORO1A, CD79B, C3, CNN2, PSME2B, PLCG2, NCKAP1L, SFN, SLAMF6, LYN, SLC3…	680	2674	19662	1.75175	1.17669e-10	2.94201e-11	2.65784e-11
GOTERM_CC_DIRECT	GO:0030670	phagocytic vesicle membrane	2.2409	2.73811e-11	H2-T23, SLC11A1, H2-Q7, H2-K1, IRGM1, TAP1, CORO1A, TAPBP, RAB32, TLR1, RAB38, TLR6, B2M, H2-D1, H2-Q10, TLR2	680	47	19662	9.8433	9.63815e-09	1.92763e-09	1.74143e-09
GOTERM_CC_DIRECT	GO:0005615	extracellular space	14.2857	6.18193e-11	IL1RN, LOXL3, CXCL13, ICAM1, CXCL16, C4B, LGALS3, C1RL, LIPG, TNFSF10, IL12B, PGLYRP1, B2M, IL15RA, RBP4, HIST1H2BF, PLBD1, SERPING1, AMY1, CFB, LYZ2, IL4RA, PDGFB, PLA2G7, C3, SERPINA3F, PLTP, GSDMD, WNT10A, NAPSA, TGFB1, VCAM1, TNFSF13, LY86, MSN, SERPINA3M, SERPINA3N, SERPINA3G, SERPINA3I, CXCL10, BMP2, BGLAP3, TGFBI, PAM, H2-Q10, FBN1, LGALS3BP, PIGR, CXCL9, CD40, ITGAM, LRRK2, CTSZ, SERPINA1…	680	1504	19662	1.96097	2.17604e-08	3.62673e-09	3.27642e-09
GOTERM_CC_DIRECT	GO:0005576	extracellular region	15.5462	4.36823e-10	IL1RN, APOL9B, ADAMDEC1, APOL9A, LOXL3, CXCL13, IFI30, C4B, LGALS3, C1RL, LIPG, IL12B, THSD7A, LGALS9, PGLYRP1, B2M, FAM19A4, IL15RA, APOL11B, RBP4, SERPING1, AMY1, CFB, C4BP, APOL10B, CALCB, LYZ2, HTRA4, IL4RA, HTRA1, PDGFB, CFP, PLA2G7, C3, SFN, WFDC17, PLTP, GSDMD, WNT10A, NAPSA, TGFB1, TNFSF13, LY86, ISG15, SERPINA3M, SERPINA3N, CXCL10, BMP2, BGLAP3, COL9A1, TGFBI, HPSE, FBN1, LGALS3BP, PIGR,…	680	1753	19662	1.83088	1.53762e-07	2.1966e-08	1.98443e-08
GOTERM_CC_DIRECT	GO:0005886	plasma membrane	33.4734	7.93901e-10	IFI30, ICAM1, C3AR1, THSD7A, CPNE2, B2M, CMKLR1, ARRDC4, IL15RA, SLC11A1, BTK, H2-D1, GYPC, RRAD, TAPBPL, FPR2, LY9, PIK3R6, PIK3R5, CD79B, INPP5D, TSPAN4, PLCG2, SLAMF7, B4GALNT1, SLAMF6, GPM6B, GSDMD, LYN, CCR1, MSR1, DTNA, IRGM1, ART2B, GNG13, BST2, PARVG, PAM, GPR18, CD22, ACVRL1, PIGR, NRP2, CD40, LITAF, EDA2R, GPR132, MMP25, GNGT2, KCNT2, CHL1, MRC1, CLDN23, CD38, CCR7, CCR6, CCR5, HAVCR2, …	680	4874	19662	1.41785	2.79453e-07	3.49317e-08	3.15576e-08
GOTERM_CC_DIRECT	GO:0045121	membrane raft	4.48179	2.41007e-09	RGS19, LRRK2, ITGB2, KCNA3, ICAM1, INPP5D, STOM, GPM6B, LYN, FCER1G, CAV2, NFAM1, RFTN1, TNFRSF1B, TGFBR2, TLR1, LAT2, BST2, FCGR1, CD4, PTPRC, BTK, FAS, CD48, TLR6, HPSE, FCGR2B, MDGA1, CARD11, H2-D1, BIRC3, TLR2	680	262	19662	3.53157	8.48344e-07	9.42605e-08	8.51558e-08
GOTERM_CC_DIRECT	GO:0042612	MHC class I protein complex	1.2605	1.95534e-08	H2-T23, H2-Q6, H2-Q7, H2-K1, H2-Q2, B2M, H2-Q1, H2-D1, H2-Q10	680	16	19662	16.2645	6.88276e-06	6.88278e-07	6.21797e-07
GOTERM_CC_DIRECT	GO:0042613	MHC class II protein complex	1.12045	3.86826e-08	CD74, H2-DMB2, H2-EB1, H2-DMA, H2-DMB1, H2-OA, H2-AA, H2-AB1	680	12	19662	19.2765	1.36162e-05	1.23784e-06	1.11828e-06
GOTERM_CC_DIRECT	GO:0005764	lysosome	4.62185	1.70648e-07	UNC93B1, H2-DMA, LRRK2, CTSZ, CXCR4, TNFAIP3, IFI30, LITAF, CTSS, H2-DMB2, IL4I1, DRAM1, H2-DMB1, ACP5, CTSH, SLC15A3, CTSC, CTSB, CD74, NAPSA, SLC11A1, LAPTM5, IRGM1, TM6SF1, H2-AA, MARCH1, HCK, IL1B, PLBD1, RAB38, TLR7, HPSE, CD68	680	331	19662	2.88274	6.00663e-05	5.00568e-06	4.52217e-06
GOTERM_CC_DIRECT	GO:0001772	immunological synapse	1.40056	1.60118e-06	CD53, LGALS3, RHOH, CD37, ITGAL, SCIMP, CORO1A, CARD11, ICAM1, HAVCR2	680	34	19662	8.50433	0.000563457	4.3355e-05	3.91673e-05
GOTERM_CC_DIRECT	GO:0020005	symbiont-containing vacuole membrane	0.840336	2.48582e-06	GBP6, GBP2B, GBP7, GBP2, IIGP1, GBP3	680	8	19662	21.686	0.000874627	6.0026e-05	5.4228e-05
GOTERM_CC_DIRECT	GO:0005887	integral component of plasma membrane	9.80392	2.55792e-06	ACVRL1, PILRB1, PILRB2, STEAP4, PLXND1, GPR65, LY75, EDA2R, TSPAN10, ICAM1, BEST1, SPN, KLRB1B, GPR132, CCRL2, STAB1, MRC1, C3AR1, SLC16A8, CD37, PLXNC1, CD53, SLC13A3, SLC38A1, FCER1G, GPR35, CD180, PLAUR, CYBB, ICOSL, TNFRSF1B, TGFBR2, TAPBP, TLR1, CLDN11, TLR7, TLR6, TLR5, TLR3, SLC22A2, HVCN1, PTAFR, C5AR1, KCNA3, SLC5A10, FPR2, CD79B, GPNMB, BTLA, TSPAN4, STOM, TNFRSF14, SLAMF6, RHBG, CD74, …	680	1126	19662	1.79754	0.000899985	6.0026e-05	5.4228e-05
GOTERM_CC_DIRECT	GO:0072562	blood microparticle	2.38095	1.43917e-05	C1QB, C4BP, FGB, LGALS3BP, C1RB, C1RA, TGFB1, MSN, SERPINA3M, SERPINA3N, C3, C4B, SERPING1, STOM, GC, CFB, C1QC	680	133	19662	3.69586	0.00505311	0.000306881	0.000277239
GOTERM_CC_DIRECT	GO:0005797	Golgi medial cisterna	0.980392	1.48209e-05	H2-Q6, H2-Q7, H2-K1, H2-Q2, H2-Q1, H2-D1, H2-Q10	680	17	19662	11.9061	0.00520342	0.000306881	0.000277239
GOTERM_CC_DIRECT	GO:0070971	endoplasmic reticulum exit site	0.980392	3.06258e-05	H2-Q6, H2-Q7, H2-K1, H2-Q2, H2-Q1, H2-D1, H2-Q10	680	19	19662	10.6528	0.0107225	0.000598905	0.000541056
GOTERM_CC_DIRECT	GO:0001891	phagocytic cup	0.980392	4.24773e-05	ANXA1, BIN2, IRGM1, LCP1, CORO1A, AIF1, MYO1G	680	20	19662	10.1201	0.0148411	0.000786948	0.000710936
GOTERM_CC_DIRECT	GO:0031410	cytoplasmic vesicle	6.02241	6.95721e-05	RGS19, UNC93B1, LRRK2, C5AR1, CXCR4, MEFV, CORO1A, SOCS1, GPNMB, STOM, GBP2, RHBG, TRIM21, GBP3, GBP6, ARRDC4, MSR1, GBP5, IL15RA, GBP2B, GBP7, ANXA1, SYK, CAV2, MYOF, IRGM1, PLA2G4A, RAB32, TLR1, MARCH1, MYO1E, HCK, MMP14, GBP10, ARHGAP30, FES, IL1B, BTK, RAB38, TLR7, TLR6, PAM, TLR2	680	646	19662	1.92466	0.0241928	0.00122447	0.0011062
GOTERM_CC_DIRECT	GO:0016021	integral component of membrane	39.916	9.87689e-05	TRAF3IP3, TMEM200A, CLEC10A, LST1, ANTXR2, ICAM1, IL27RA, TNFSF10, C3AR1, THSD7A, CMKLR1, IL15RA, SLC11A1, CH25H, IFI27, H2-D1, IGSF6, GYPC, SLC22A2, TMTC1, TAPBPL, FPR2, LY9, CD79B, SLAMF9, TSPAN4, SLAMF8, SLAMF7, ST8SIA6, B4GALNT1, SLAMF6, GPM6B, CCR1, MSR1, H2-EB1, AW112010, TNFSF13, PILRA, BST2, FXYD5, IFI27L2A, PAM, GPR18, CD22, ACVRL1, CLIC5, PIGR, NRP2, CD40, PIGZ, MS4A4C, EDA2R, M1AP, GPR…	680	6878	19662	1.19812	0.0341709	0.00165556	0.00149564
GOTERM_CC_DIRECT	GO:0005902	microvillus	1.54062	0.000275801	SPN, KCNJ10, VCAM1, TGFB1, LYZ2, LRRK2, FSCN1, MSN, MYO7A, CD302, MYO1G	680	76	19662	4.18502	0.0925306	0.00441282	0.00398658
GOTERM_CC_DIRECT	GO:0042629	mast cell granule	0.840336	0.000781515	SRGN, LAT2, LYN, ANXA1, CD300A, BTK	680	22	19662	7.88583	0.240581	0.0119606	0.0108053
GOTERM_CC_DIRECT	GO:0005794	Golgi apparatus	8.68347	0.00128737	CLIC5, STEAP4, NCF1, LRRK2, H2-K1, LITAF, GLIPR2, DSE, LIPG, B2M, CTSC, SRGN, GBP5, CHST7, TICAM2, CYBB, PLA2G4A, CYBA, TMEM173, TLR1, ADAM19, HCK, RAB30, MDFIC, B3GNT7, CHST1, RAB38, TLR6, PLCB2, CD44, H2-D1, TLR2, H2-Q6, H2-Q7, H2-Q2, TAPBPL, H2-Q1, STX11, PTGS1, CD79B, ST8SIA6, B4GALNT1, GBP2, GBP3, LYN, CD74, GBP2B, VCAM1, CAV2, IRGM2, IRGM1, IIGP1, SULF2, BST2, MARCH1, FES, BGLAP3, LPCAT2, U…	680	1190	19662	1.50648	0.364565	0.0188814	0.0170576
GOTERM_CC_DIRECT	GO:0071556	integral component of lumenal side of endoplasmic reticulum membrane	0.70028	0.0014194	H2-T23, H2-Q7, H2-K1, H2-D1, H2-Q10	680	15	19662	9.63824	0.393459	0.0199851	0.0180547
GOTERM_CC_DIRECT	GO:0031234	extrinsic component of cytoplasmic side of plasma membrane	1.2605	0.00231023	LYN, FGR, HCK, DTNA, SYK, CAV2, RGS1, FES, BTK	680	68	19662	3.82695	0.556981	0.031277	0.0282559
GOTERM_CC_DIRECT	GO:0043020	NADPH oxidase complex	0.560224	0.00294691	NCF1, NCF4, CYBB, CYBA	680	9	19662	12.851	0.646136	0.038419	0.034708
GOTERM_CC_DIRECT	GO:0005829	cytosol	11.7647	0.00320921	CDKN1A, NCF1, NCF2, LRRK2, NCF4, SAT1, HK2, HEBP1, HK3, TRIM6, CASP7, RGS1, KYNU, TMSB4X, ARHGDIB, RAC2, CASP1, CAR13, CTSH, TGM2, HERC6, ZBP1, GPX2, ANXA1, RIPK3, SYK, DDX58, PLA2G4A, MYO7A, PARP9, SERPINB8, VAV1, PGM2L1, TGFBR2, FGR, APBB1IP, IL1A, HCK, IL1B, FSCN1, IGTP, BTK, LCP2, RAB38, LCP1, ASPA, PLCB2, DGKI, IDO1, UBA7, GM4070, HTRA1, NLRC5, NOD2, SAMSN1, CORO1A, AIF1, FYB, PSMB10, ADAP2,…	680	1784	19662	1.36145	0.677437	0.0403443	0.0364474
GOTERM_CC_DIRECT	GO:0035355	Toll-like receptor 2-Toll-like receptor 6 protein complex	0.420168	0.00349061	TLR1, TLR6, TLR2	680	3	19662	28.9147	0.707954	0.0423688	0.0382763
GOTERM_CC_DIRECT	GO:0002102	podosome	0.840336	0.00449643	VCAM1, BIN2, SH3PXD2B, FSCN1, LCP1, FERMT3	680	32	19662	5.42151	0.795321	0.0527581	0.0476622
GOTERM_CC_DIRECT	GO:0042825	TAP complex	0.420168	0.00682141	TAP2, TAP1, TAPBP	680	4	19662	21.686	0.910128	0.0750356	0.0677878
GOTERM_CC_DIRECT	GO:0008537	proteasome activator complex	0.420168	0.00682141	PSME2B, PSME1, PSME2	680	4	19662	21.686	0.910128	0.0750356	0.0677878
GOTERM_CC_DIRECT	GO:0005783	endoplasmic reticulum	8.82353	0.00870002	NRROS, LRRK2, CTSZ, H2-K1, PIGZ, SNX10, IFIT2, STBD1, DSE, CASP4, CTSC, TGM2, TICAM2, RSAD2, RHBDF2, TAP2, SHISA5, CYBB, PLA2G4A, TAP1, TMEM173, TAPBP, RAB32, CPED1, PLA2G16, CH25H, RCN1, OAS2, RAB38, TLR7, DNASE1L3, TLR3, H2-D1, UNC93B1, H2-Q6, H2-Q7, ATP10B, PLD4, OAS1A, H2-Q2, TAPBPL, PTGS2, H2-Q1, PTGS1, STOM, SLAMF7, CD74, P2RY13, SLC37A2, VCAM1, F10, CAV2, ERAP1, IRGM1, IFI47, IIGP1, SULF2,…	680	1323	19662	1.37689	0.953848	0.0928002	0.0838366
GOTERM_CC_DIRECT	GO:0005925	focal adhesion	3.36134	0.00961643	ANXA1, CAV2, FBLIM1, ARPC1B, PLAUR, MSN, FHL3, CYBA, ICAM1, APBB1IP, CNN2, HCK, MMP14, PTPRC, PARVG, FES, ZYX, RAC2, TSPAN4, LCP1, VIM, B2M, CD44, TGM2	680	391	19662	1.77482	0.966672	0.0988489	0.089301
GOTERM_CC_DIRECT	GO:0031225	anchored component of membrane	1.68067	0.00982873	BST2, CD52, MMP25, LY6I, VCAM1, PLAUR, ART2B, CD48, LY6A, TNFRSF23, MDGA1, LY6E	680	141	19662	2.46083	0.969095	0.0988489	0.089301
GOTERM_CC_DIRECT	GO:0072558	NLRP1 inflammasome complex	0.420168	0.0111095	NLRP1A, CASP4, CASP1	680	5	19662	17.3488	0.980404	0.102909	0.0929693
GOTERM_CC_DIRECT	GO:0072559	NLRP3 inflammasome complex	0.420168	0.0111095	GSDMD, CASP4, CASP1	680	5	19662	17.3488	0.980404	0.102909	0.0929693
GOTERM_CC_DIRECT	GO:1990111	spermatoproteasome complex	0.420168	0.0111095	PSMB8, PSMB10, PSMB9	680	5	19662	17.3488	0.980404	0.102909	0.0929693
GOTERM_CC_DIRECT	GO:0031982	vesicle	1.82073	0.0116574	IL1RN, ANXA1, MSN, NOD2, BMP2, BASP1, IL1B, BGLAP3, SPP1, TSPAN4, STOM, RAB38, PF4	680	164	19662	2.29202	0.983877	0.105215	0.0950524
GOTERM_CC_DIRECT	GO:0045335	phagocytic vesicle	0.840336	0.0129834	RAB32, TLR1, CYBB, PLD4, RAB38, CORO1A	680	41	19662	4.23142	0.989949	0.114254	0.103218
GOTERM_CC_DIRECT	GO:0072557	IPAF inflammasome complex	0.420168	0.0162851	NAIP6, CASP4, CASP1	680	6	19662	14.4574	0.99691	0.134894	0.121864
GOTERM_CC_DIRECT	GO:0061702	inflammasome complex	0.420168	0.0162851	GSDMD, NLRP1A, CASP4	680	6	19662	14.4574	0.99691	0.134894	0.121864
GOTERM_CC_DIRECT	GO:0005765	lysosomal membrane	2.2409	0.0165579	H2-EB1, H2-DMA, LAPTM5, IRGM1, MYO7A, TM6SF1, LITAF, H2-DMB2, MARCH1, DRAM1, H2-DMB1, HPSE, CD68, SLC15A3, ATP6V0D2, TLR3	680	234	19662	1.97707	0.997197	0.134894	0.121864
GOTERM_CC_DIRECT	GO:0005771	multivesicular body	0.70028	0.0168617	BST2, CD74, H2-DMB2, H2-DMA, H2-AB1	680	29	19662	4.98529	0.997486	0.134894	0.121864
GOTERM_CC_DIRECT	GO:0005789	endoplasmic reticulum membrane	5.04202	0.0226116	NRROS, UNC93B1, PIGZ, PLD4, TAPBPL, PTGS2, GM12185, PTGS1, STBD1, CASP4, GM4841, GM5431, TGTP2, TGTP1, RSAD2, ERAP1, RHBDF2, IRGM2, SHISA5, IRGM1, IFI47, TMEM173, IIGP1, TAPBP, MARCH1, CH25H, F830016B08RIK, CD4, CYP4F18, LPCAT2, TBXAS1, IGTP, TMEM119, GM4951, TLR7, TLR3	680	710	19662	1.4661	0.999681	0.176873	0.159789
GOTERM_CC_DIRECT	GO:0001725	stress fiber	0.980392	0.0279314	CNN2, FBLIM1, FSCN1, ZYX, FHL3, CYBA, LCP1	680	67	19662	3.02094	0.999953	0.213736	0.193091
GOTERM_CC_DIRECT	GO:0032009	early phagosome	0.420168	0.0290371	SYK, UNC93B1, TLR7	680	8	19662	10.843	0.999969	0.217469	0.196464
GOTERM_CC_DIRECT	GO:0001931	uropod	0.420168	0.0532757	SPN, SELPLG, MSN	680	11	19662	7.88583	1	0.385541	0.348302
GOTERM_CC_DIRECT	GO:0008305	integrin complex	0.560224	0.0536691	ITGAM, ITGB2, ITGAX, ITGAL	680	25	19662	4.62635	1	0.385541	0.348302
GOTERM_CC_DIRECT	GO:0035692	macrophage migration inhibitory factor receptor complex	0.280112	0.0678764	CD74, CD44	680	2	19662	28.9147	1	0.450801	0.407258
GOTERM_CC_DIRECT	GO:0034687	integrin alphaL-beta2 complex	0.280112	0.0678764	ITGB2, ITGAL	680	2	19662	28.9147	1	0.450801	0.407258
GOTERM_CC_DIRECT	GO:0033257	Bcl3/NF-kappaB2 complex	0.280112	0.0678764	BCL3, NFKB2	680	2	19662	28.9147	1	0.450801	0.407258
GOTERM_CC_DIRECT	GO:0035354	Toll-like receptor 1-Toll-like receptor 2 protein complex	0.280112	0.0678764	TLR1, TLR2	680	2	19662	28.9147	1	0.450801	0.407258
GOTERM_CC_DIRECT	GO:0005901	caveola	0.980392	0.076939	HCK, CAV2, LRRK2, MYOF, PTGS2, TGFBR2, CTSB	680	86	19662	2.35352	1	0.49605	0.448136
GOTERM_CC_DIRECT	GO:0000502	proteasome complex	0.840336	0.0775078	PSME2B, PSME1, PSME2, PSMB8, PSMB10, PSMB9	680	66	19662	2.62861	1	0.49605	0.448136
GOTERM_CC_DIRECT	GO:0005884	actin filament	0.840336	0.0856116	HCK, INPP5D, RAC2, LCP1, CORO1A, AIF1	680	68	19662	2.5513	1	0.53813	0.486151
GOTERM_CC_DIRECT	GO:0005768	endosome	3.64146	0.091461	STEAP4, UNC93B1, H2-DMA, LRRK2, NCF4, SLA, CXCR4, SNX10, H2-DMB1, MRC1, CCR5, ARRDC4, ANXA1, TICAM2, RFTN1, IRGM1, CYBA, WDR72, SNX20, BST2, MARCH1, TLR7, CD68, ATP6V0D2, TLR3, TLR13	680	544	19662	1.38195	1	0.550381	0.497219
GOTERM_CC_DIRECT	GO:0042101	T cell receptor complex	0.420168	0.0929566	APBB1IP, SYK, CARD11	680	15	19662	5.78294	1	0.550381	0.497219
GOTERM_CC_DIRECT	GO:0016323	basolateral plasma membrane	1.68067	0.0943997	S100G, KCNJ10, ANXA1, SLC22A2, C5AR1, PDGFB, SLC1A3, MSN, NOD2, RHBG, CD44, BEST1	680	203	19662	1.70924	1	0.550381	0.497219

## Sheet: UP_CC_T2D_vs_Healthy
#Upregulated GO enrichemnt in T2D vs Healthy Adult Group
#Cellular Component
Category	ID	Term	%	PValue	Genes	List Total	Pop Hits	Pop Total	Fold Enrichment	Bonferroni	Benjamini	FDR
GOTERM_CC_DIRECT	GO:0009986	cell surface	12.3711	4.06614e-16	ACHE, CSF1R, ITGAM, CLEC12A, MSLNL, ITGB2, C5AR1, PDGFB, TRF, CXCR4, PLAT, PTPRK, SLC7A11, TSPAN33, FUT4, CTSS, DPP4, LGALS3, CLMP, PLAU, CLEC5A, ITGAX, ENPP1, CD36, APOE, CCR5, ROS1, HAVCR2, CD53, CD74, TGFB1, CAV2, NFAM1, SLC11A1, MSN, SULF2, CD2, IL1A, GPRC5B, BMP2, PTPRC, TYROBP, AXL, ADAM8, FCGR2B, KCNK2, CD44, H2-AB1	366	629	19662	4.09956	1.32783e-13	1.21577e-13	1.14665e-13
GOTERM_CC_DIRECT	GO:0016020	membrane	52.0619	1.49978e-14	OXTR, PLEKHB1, AQP4, LDLRAD3, LGALS3, ALCAM, C3AR1, PIP4K2A, THSD7A, ARRDC4, PAQR9, SLC11A1, KCTD12, MGARP, KDELR3, ATP6V0D2, FREM2, IGSF6, PDGFB, TMTC3, PIK3R6, PIK3R5, CYB5R2, CYP4X1, TSPAN6, INPP5D, SLAMF9, TSPAN4, SLAMF7, KCNMB4, APOE, TSPAN1, SCN3A, FDFT1, LYN, MSR1, PARVG, TMEM98, FXYD6, FXYD5, FERMT3, ACHE, RYR2, FCRLS, PTPRK, SLC7A11, CTSS, EDA2R, GNGT2, STBD1, STAB1, CD36, CCR5, HAVCR2, …	366	6998	19662	1.55069	4.48142e-12	2.24218e-12	2.1147e-12
GOTERM_CC_DIRECT	GO:0005576	extracellular region	18.8144	9.18619e-11	LGALS3BP, CRISP2, ACHE, IL1RN, COL14A1, SERPINA10, TRF, CSN3, PLAT, TREM2, SERPINA7, PRSS23, ENDOU, LGALS3, BPIFA3, PLAU, C1RL, ENPP1, GAST, THSD7A, PAMR1, SVAL2, RSPO4, HAVCR2, VASH2, PLAUR, CARTPT, C1QL3, MMP12, IL1A, CRISPLD2, HHIPL1, ANGPTL4, VSTM2A, MFGE8, C1QB, PMEL, PON3, CPB2, LYZ2, PDGFB, NTN4, TMPRSS2, CAPG, REG3G, PLA2G7, COCH, DPP4, CCL9, TTR, CCL6, APOF, SPP2, APOE, NXPH1, GC, PLTP, …	366	1753	19662	2.23711	2.74667e-08	9.15557e-09	8.63502e-09
GOTERM_CC_DIRECT	GO:0009897	external side of plasma membrane	6.18557	3.0191e-08	CD74, ITGAM, CXCR4, AQP4, GFRA1, H2-AA, DLK1, CD2, LGALS3, FCGR3, CD200R1, PTPRC, ALCAM, ITGAX, SLAMF7, CD48, CD36, IL7R, CCR5, FCGR2B, MFGE8, CD44, CCR2, H2-AB1	366	317	19662	4.06723	9.02707e-06	2.25678e-06	2.12847e-06
GOTERM_CC_DIRECT	GO:0005615	extracellular space	14.6907	4.32784e-07	LGALS3BP, ACHE, IL1RN, ITGAM, COL14A1, 1810009J06RIK, SERPINA10, TRF, CSN3, PLAT, SERPINA7, CTSS, CXCL16, LGALS3, PLAU, C1RL, ENPP1, CTSH, GAST, CD36, GM2663, GFRA1, CARTPT, IL1A, GPRC5B, ANGPTL4, MFGE8, PON3, CPB2, LYZ2, PDGFB, PLA2G7, COCH, CCL9, TTR, CCL6, APOE, GC, PLTP, CTHRC1, GDF10, TGFB1, BDNF, LY86, MSN, CCK, INHBA, MERTK, MT3, DLK1, SULF2, BMP3, BMP2, AXL, A630095E13RIK, MDGA1, C1QC	366	1504	19662	2.03598	0.000129394	2.58805e-05	2.4409e-05
GOTERM_CC_DIRECT	GO:0005886	plasma membrane	34.0206	1.21766e-06	GUCY1B3, OXTR, CLEC4N, GLDC, AQP4, LDLRAD3, PLB1, ALCAM, SLCO2B1, CLEC5A, C3AR1, PIP4K2A, ENPP1, THSD7A, ROS1, PHLDA3, ARRDC4, PAQR9, ACTN2, SLC11A1, CYBB, CYBA, FCGR3, TYROBP, ADAM8, KCTD12, STEAP1, FREM2, CSF1R, HVCN1, SLC1A1, ALOX15, C5AR1, RASAL1, LIN7A, SLCO1A6, PIK3R6, PIK3R5, DPP4, INPP5D, TSPAN4, CD300LB, SLAMF7, CD300LD, APOE, ASIC2, SCN3A, TSPAN1, GRIA3, LYN, MSR1, ATP8B4, CAV2, MSN, MT…	366	4874	19662	1.45491	0.000364016	6.06803e-05	5.72302e-05
GOTERM_CC_DIRECT	GO:0005887	integral component of plasma membrane	11.5979	2.51123e-06	PMEL, OXTR, HVCN1, C5AR1, AQP4, SLC7A11, SLCO1A6, SLC5A10, ATP12A, TSPAN33, EDA2R, ALCAM, GPNMB, GM609, TSPAN6, SLCO2B1, STAB1, TSPAN4, C3AR1, ENPP1, KCNMB4, PLXNC1, ASIC2, TSPAN1, CCR2, CD53, CD74, CD72, UGT1A1, GPR34, CAV2, LAPTM5, PLAUR, CYBB, SSTR1, TNFRSF1B, CLCN5, PTPRC, ADAM8, FXYD5, STEAP1, TLR5, FCGR2B, KCNK2, TNFRSF21	366	1126	19662	2.14694	0.000750578	0.000107266	0.000101167
GOTERM_CC_DIRECT	GO:0070062	extracellular exosome	21.134	4.28246e-06	SIRPB1B, LGALS3BP, RYR2, IL1RN, ITGAM, COL14A1, GBE1, ITGB2, SERPINA10, TRF, PLAT, SERPINA7, PRSS23, LGALS3, TUBB6, ALCAM, CALB1, PTER, PLAU, C1RL, ACP5, CTSH, THSD7A, PHLDA3, HAVCR2, VAV3, CD53, GSTO2, ACTN2, PLAUR, GFRA1, LAT2, DCTD, MAN1A, ALDH1A3, GPRC5B, FCGR3, GPRC5A, CRISPLD2, CD48, ALDOB, KCTD12, MFGE8, ATP6V0D2, FBP2, CD44, FREM2, RAPGEF3, C1QB, PON3, CPB2, LYZ2, SLC1A1, CXCR4, TMPRSS2, …	366	2674	19662	1.6474	0.00127964	0.000160057	0.000150957
GOTERM_CC_DIRECT	GO:0045121	membrane raft	4.63918	8.77846e-06	LYN, CAV2, RGS16, NFAM1, RFTN1, ITGB2, TNFRSF1B, CD2, LAT2, DPP4, GPRC5B, PTPRC, INPP5D, DLC1, CD48, CD36, FCGR2B, MDGA1	366	262	19662	3.69078	0.00262133	0.00029164	0.000275059
GOTERM_CC_DIRECT	GO:0043025	neuronal cell body	5.6701	0.00107789	ACHE, TGFB1, BDNF, PDGFB, CYBB, CYBA, CCK, GFRA1, PTPRK, TNFRSF1B, CYP17A1, ALCAM, CALB1, CCNG1, APOE, ASIC2, SCN3A, KCNK2, DBN1, GRIA3, RAPGEF3, CCR2	366	534	19662	2.21324	0.275637	0.0293181	0.0276512
GOTERM_CC_DIRECT	GO:0005925	focal adhesion	4.63918	0.00107859	CAV2, ACTN2, PLAUR, FHL2, MSN, CYBA, DPP4, ARHGAP22, HCK, DAB2, PTPRC, ALCAM, PARVG, PLAU, DLC1, TSPAN4, SCARF2, CD44	366	391	19662	2.4731	0.275789	0.0293181	0.0276512
GOTERM_CC_DIRECT	GO:0042613	MHC class II protein complex	1.03093	0.00123239	CD74, H2-DMB1, H2-AA, H2-AB1	366	12	19662	17.9071	0.308375	0.0294422	0.0277682
GOTERM_CC_DIRECT	GO:0016324	apical plasma membrane	4.12371	0.0012801	OXTR, SLC1A1, MSN, TRF, CYBA, ATP12A, PLB1, DPP4, DAB2, CYP4F18, SLCO2B1, PRKG2, CD36, ATP6V0D2, KCNK2, CD44	366	328	19662	2.62055	0.318183	0.0294422	0.0277682
GOTERM_CC_DIRECT	GO:0005764	lysosome	4.12371	0.00140739	CD74, DNASE2B, SLC11A1, LAPTM5, CXCR4, H2-AA, CTSS, HCK, H2-DMB1, ACP5, CTSH, APOE, HAP1, ALDOB, CD68, TSPAN1	366	331	19662	2.5968	0.34368	0.0300579	0.0283489
GOTERM_CC_DIRECT	GO:0034362	low-density lipoprotein particle	1.03093	0.00158016	MSR1, APOF, APOE, PLA2G7	366	13	19662	16.5296	0.376771	0.0314978	0.029707
GOTERM_CC_DIRECT	GO:0016021	integral component of membrane	39.6907	0.00326871	OXTR, CLEC4N, PLEKHB1, AQP4, LDLRAD3, ATP12A, PLB1, CXCL16, ALCAM, GM609, SLCO2B1, CLEC5A, C3AR1, ENPP1, THSD7A, PLXNC1, ROS1, PAQR9, SLC11A1, DIO1, CYBB, SHISA2, TMEM252, FCGR3, TYROBP, ADAM8, KDELR3, MGARP, STEAP1, FREM2, CSF1R, PMEL, IGSF6, HVCN1, SLC1A1, C5AR1, TMTC3, PLD4, ILDR2, SLC38A11, SLCO1A6, FUT4, MARCH11, SEL1L3, DPP4, CYP4X1, TSPAN6, SLAMF9, TSPAN4, CD300LB, SLAMF7, KCNMB4, CD300LD,…	366	6878	19662	1.20283	0.624293	0.0602973	0.056869
GOTERM_CC_DIRECT	GO:0072562	blood microparticle	2.31959	0.00342827	C1QB, LGALS3BP, TGFB1, MSN, TRF, ANGPTL4, APOE, GC, C1QC	366	133	19662	3.63528	0.641854	0.0602973	0.056869
GOTERM_CC_DIRECT	GO:0048471	perinuclear region of cytoplasm	6.18557	0.00537352	LYN, CX3CR1, ACHE, BDNF, CAV2, MSN, CYBB, TRF, INHBA, TNFRSF1B, MT3, DAB2, STBD1, CCNG1, HAP1, ALDOB, GC, SYNC, ROS1, TSPAN1, DBN1, DYNC1I1, RAPGEF3, CCR2	366	692	19662	1.86317	0.800315	0.0892601	0.0841851
GOTERM_CC_DIRECT	GO:0030864	cortical actin cytoskeleton	1.28866	0.00815095	ACTN2, DLC1, RAPGEF3, MYO1F, CAP2	366	43	19662	6.24666	0.913458	0.12827	0.120977
GOTERM_CC_DIRECT	GO:0030424	axon	3.86598	0.00965502	ACHE, TGFB1, BDNF, CCK, GFRA1, PTPRK, TNFRSF1B, MT3, CYP17A1, ALCAM, CALB1, GC, SCN3A, KCNK2, TNFRSF21	366	370	19662	2.17789	0.945025	0.144343	0.136136
GOTERM_CC_DIRECT	GO:0043020	NADPH oxidase complex	0.773196	0.0113497	NCF4, CYBB, CYBA	366	9	19662	17.9071	0.967056	0.158997	0.149957
GOTERM_CC_DIRECT	GO:0031982	vesicle	2.31959	0.0116988	BMP3, IL1RN, BMP2, GPRC5A, TSPAN4, MSN, TRF, TSPAN1, DYNC1I1	366	164	19662	2.94812	0.970358	0.158997	0.149957
GOTERM_CC_DIRECT	GO:0005783	endoplasmic reticulum	9.53608	0.0137481	GUCY2C, PMEL, RYR2, RASGRF2, ILDR2, PLD4, SLC38A11, CYP17A1, DPP4, CYP4X1, STBD1, DSE, SLAMF7, CD36, APOE, FDFT1, CD74, SLC37A2, UGT1A1, CAV2, DIO1, CYBB, SHISA2, A1CF, SULF2, CPED1, MAN1A, CYP4F18, DHRS9, TMEM98, LPCAT2, TBXAS1, TMEM119, HAP1, KDELR3, LPIN2, KCNK2	366	1323	19662	1.50241	0.984064	0.178725	0.168564
GOTERM_CC_DIRECT	GO:0005581	collagen trimer	1.54639	0.0191599	C1QB, MSR1, COL14A1, C1QL3, C1QC, CTHRC1	366	83	19662	3.88347	0.996925	0.238701	0.225129
GOTERM_CC_DIRECT	GO:0016023	cytoplasmic, membrane-bounded vesicle	2.06186	0.0228388	ARRDC4, CADPS2, GPNMB, BDNF, C5AR1, TRF, CXCR4, HAP1	366	151	19662	2.84616	0.999	0.273152	0.257621
GOTERM_CC_DIRECT	GO:0001772	immunological synapse	1.03093	0.0248232	CD53, LGALS3, ALCAM, HAVCR2	366	34	19662	6.32015	0.999456	0.285466	0.269236
GOTERM_CC_DIRECT	GO:0005911	cell-cell junction	2.31959	0.0345974	CD2, CD53, CXCR4, AQP4, LIN7A, PTPRK, DBN1, VAV1, ARHGEF6	366	201	19662	2.40543	0.999973	0.383134	0.36135
GOTERM_CC_DIRECT	GO:0035692	macrophage migration inhibitory factor receptor complex	0.515464	0.0367838	CD74, CD44	366	2	19662	53.7213	0.999986	0.38771	0.365667
GOTERM_CC_DIRECT	GO:0031234	extrinsic component of cytoplasmic side of plasma membrane	1.28866	0.037604	LYN, HCK, RYR2, CAV2, ALOX15	366	68	19662	3.9501	0.999989	0.38771	0.365667
GOTERM_CC_DIRECT	GO:0009925	basal plasma membrane	1.03093	0.0427638	SLCO2B1, TRF, AQP4, RAPGEF3	366	42	19662	5.11632	0.999998	0.414719	0.391139
GOTERM_CC_DIRECT	GO:0071944	cell periphery	1.28866	0.0429976	PTPRC, MSN, SPRR1A, FUT4, RAPGEF3	366	71	19662	3.78319	0.999998	0.414719	0.391139
GOTERM_CC_DIRECT	GO:0031225	anchored component of membrane	1.80412	0.0480357	ACHE, EFNA3, DPEP2, PLAUR, GFRA1, CD48, MDGA1	366	141	19662	2.66702	1	0.448833	0.423314
GOTERM_CC_DIRECT	GO:0005902	microvillus	1.28866	0.0529031	OXTR, TGFB1, LYZ2, MSN, RAPGEF3	366	76	19662	3.5343	1	0.479334	0.452081
GOTERM_CC_DIRECT	GO:0005944	phosphatidylinositol 3-kinase complex, class IB	0.515464	0.0546665	PIK3R6, PIK3R5	366	3	19662	35.8142	1	0.480743	0.45341
GOTERM_CC_DIRECT	GO:0005769	early endosome	2.31959	0.0608833	ARRDC4, TRF, CXCR4, APOE, ATP6V0D2, SNX31, RHOD, H2-AB1, HAVCR2	366	226	19662	2.13934	1	0.520117	0.490545
GOTERM_CC_DIRECT	GO:0045177	apical part of cell	1.54639	0.0632878	CLCN5, C5AR1, MSN, PLAT, CD36, RAPGEF3	366	115	19662	2.80285	1	0.52564	0.495754
GOTERM_CC_DIRECT	GO:0005578	proteinaceous extracellular matrix	2.83505	0.0715002	MMP12, LGALS3BP, LGALS3, TGFB1, COL14A1, CRISPLD2, SMOC1, NTN4, ANGPTL4, COCH, CTHRC1	366	316	19662	1.87005	1	0.577066	0.544256
GOTERM_CC_DIRECT	GO:0030425	dendrite	3.86598	0.0754728	ACHE, BDNF, PDGFB, CYBB, CYBA, CCK, PTPRK, GCHFR, ALCAM, CALB1, CCNG1, APOE, HAP1, GRIA3, CCR2	366	490	19662	1.64453	1	0.577066	0.544256
GOTERM_CC_DIRECT	GO:0010008	endosome membrane	1.54639	0.0772153	CLCN5, SLC11A1, NCF4, CD68, STEAP1, TLR13	366	122	19662	2.64203	1	0.577066	0.544256
GOTERM_CC_DIRECT	GO:0008305	integrin complex	0.773196	0.0779263	ITGAM, ITGB2, ITGAX	366	25	19662	6.44656	1	0.577066	0.544256
GOTERM_CC_DIRECT	GO:0030054	cell junction	5.15464	0.0791294	CD53, CADPS2, ACHE, CXCR4, LDLRAD3, LIN7A, DPP4, HCK, CLMP, PARVG, BIN2, DLC1, HAP1, KCTD12, GABRD, DBN1, FBP2, GRIA3, FERMT3, HAVCR2	366	718	19662	1.49642	1	0.577066	0.544256
GOTERM_CC_DIRECT	GO:0005768	endosome	4.12371	0.083541	ARRDC4, PMEL, NCF4, RFTN1, TRF, CXCR4, CYBA, RHOD, CLCN5, H2-DMB1, APOE, CD68, CCR5, STEAP1, ATP6V0D2, TLR13	366	544	19662	1.58004	1	0.590773	0.557184
GOTERM_CC_DIRECT	GO:0016323	basolateral plasma membrane	2.06186	0.0849606	C5AR1, PDGFB, MSN, ENPP1, AQP4, LIN7A, ATP12A, CD44	366	203	19662	2.1171	1	0.590773	0.557184

## Sheet: UP_MF_Dev_vs_Healthy
#Upregulated GO enrichemnt in Development vs Healthy Adult Group
#Molecular Function
Category	ID	Term	%	PValue	Genes	List Total	Pop Hits	Pop Total	Fold Enrichment	Bonferroni	Benjamini	FDR
GOTERM_MF_DIRECT	GO:0008201	heparin binding	3.13294	1.43282e-29	NRP1, NRP2, TPSB2, ITGAM, ECM2, SERPINE2, FGF1, MPO, WISP1, CYR61, FGFRL1, WISP2, CTGF, ADAMTS5, FGF7, LIPC, ADAMTSL5, MDK, ADAMTS1, LIPG, CTSG, RSPO1, ADAMTS8, POSTN, COL25A1, COL23A1, PRSS57, PCOLCE, SFRP1, CCDC80, NOV, ANGPTL3, LTF, TNXB, COL13A1, CFH, SERPINC1, NDNF, LTBP2, PRELP, PTN, THBS2, THBS1, FSTL1, THBS4, THBS3, ADAMTS15, CLEC3B, CCL7, APOH, ABI3BP, SLIT1, CCL2, SLIT3, APOE, SLIT2, EL…	2008	151	17446	4.25782	2.10768e-26	2.10768e-26	2.02744e-26
GOTERM_MF_DIRECT	GO:0005515	protein binding	26.2489	3.63978e-16	SPI1, AVIL, SERPINE1, STMN2, CLDN1, GJA1, LIPC, UBASH3B, DPYSL4, SOX17, SOX18, DPYSL5, MYC, STMN1, MYB, DPYSL3, RAVER2, JUNB, HOXA5, GPR179, IER3, CUBN, MEF2C, PRKCH, UNC5C, PDZK1, HSPG2, SOX10, KNSTRN, SYTL2, CLDN5, AR, CLDN4, PRKCQ, ASTN2, FREM2, PIF1, DHH, CDCA5, CLCNKB, GATA6, CDCA8, GATA5, GATA3, GATA2, IQGAP3, PLAC8, GJC1, FLRT2, BLOC1S1, FLRT3, PRDM16, SERPINH1, KCNMB4, CHST14, ICOS, ZBTB7…	2008	4092	17446	1.3164	4.89941e-13	2.67706e-13	2.57515e-13
GOTERM_MF_DIRECT	GO:0005178	integrin binding	1.86283	1.35463e-15	LAMA5, COL16A1, ITGB3, ICAM2, THY1, FGF1, THBS1, WISP1, THBS4, FBLN5, CYR61, WISP2, CTGF, ICAM1, TSPAN4, KDR, TIMP2, TNR, S1PR3, S1PR2, LYN, VCAM1, VWF, LAMB2, FN1, LAMB1, EMP2, IGF1, NPNT, DAB2, COL3A1, MMP14, FAP, NOV, ANGPTL3, ITGA7, CD9, ADAM8, ITGA5, TGFBI, MFGE8, CDH17, FERMT3, FBN1	2008	100	17446	3.82283	1.95977e-12	6.6422e-13	6.38933e-13
GOTERM_MF_DIRECT	GO:0005509	calcium ion binding	6.30821	5.39661e-14	SPARC, PROS1, CALML4, CDH6, CDH5, CDH3, EFEMP1, SVEP1, HMCN1, TGM2, CUBN, CD93, ACTN3, NPNT, HPCAL4, HSPG2, SYTL2, MYL4, MELK, S100A6, FKBP7, ADAM8, MASP1, ASTN2, MYL9, S100A9, S100A8, FBN2, NOTCH3, DHH, PCDH10, HPCA, LTBP4, FBLN1, ITPR3, LTBP2, PCDH12, PCDH19, NID1, RASGRP2, FBLN2, NID2, LTBP1, PCDH18, FBLN5, PCDH17, RASGRP3, S100A16, CDH23, CDH24, CDH26, JAG1, PCDH20, AIF1L, EHD2, PROC, CPS1, H…	2008	699	17446	1.852	7.93705e-11	1.9846e-11	1.90905e-11
GOTERM_MF_DIRECT	GO:0005201	extracellular matrix structural constituent	1.01609	5.68307e-12	FBN2, LAMA1, COL11A1, ELN, FBLN1, LAMB1, PRELP, LAMC1, HAPLN3, COL1A1, VCAN, COL3A1, COL1A2, COL4A2, COL5A1, COL4A1, COL5A3, COL4A4, COL5A2, MGP, PXDN, COL4A6, COL4A5, FBN1	2008	41	17446	5.0858	8.35987e-09	1.67196e-09	1.60831e-09
GOTERM_MF_DIRECT	GO:0004714	transmembrane receptor protein tyrosine kinase activity	1.1431	2.42868e-11	CSF1R, FLT1, FLT3, FLT4, MST1R, ERBB2, KDR, EPHB2, EPHB1, EPHB4, EPHB3, EPHA5, PDGFRB, EPHA4, PDGFRA, TIE1, MERTK, PTK7, AXL, KIT, TYRO3, TEK, EPHA3, FGFR2, EPHA2, DDR2, FGFR1	2008	54	17446	4.34412	3.57259e-08	5.95433e-09	5.72765e-09
GOTERM_MF_DIRECT	GO:0019838	growth factor binding	0.931414	8.32613e-10	IGFBP1, NRP1, FGFBP1, FLT1, TNXB, IGFBP4, DUSP1, IGFBP3, FLT4, IGFBP2, LTBP4, HTRA1, LTBP2, OSMR, LTBP1, CYR61, NKD2, ERBB2, KDR, IGFBP7, IGFBP6, TEK	2008	42	17446	4.55099	1.22477e-06	1.74968e-07	1.68307e-07
GOTERM_MF_DIRECT	GO:0043565	sequence-specific DNA binding	5.29213	1.24114e-09	SPI1, PRDM5, IKZF1, ETS1, SOX17, SOX18, MYC, HOXA3, HOXA2, HOXA1, SOX8, HOXA7, PITX2, SOX6, JUNB, SOX7, HOXA5, HOXA4, PKNOX2, GM5294, OSR2, MEF2C, HIC1, POU3F4, AR, ISL2, HOXB9, MAF, HOXB4, HOXB2, LMX1B, ERG, HOXB7, HOXB6, HOXB5, DLX1, DLX2, EPAS1, TCF7, GATA6, GATA5, GATA3, GATA2, PRDM16, HOXC5, HOXC4, NLRP3, NKX2-3, EGR1, NFE2, JUN, BCL11B, FOXF2, FOXF1, BCL11A, NR2F1, NR2F2, POU2F2, ZFHX4, FLI…	2008	633	17446	1.71569	1.82572e-06	2.28215e-07	2.19527e-07
GOTERM_MF_DIRECT	GO:0005520	insulin-like growth factor binding	0.677392	1.54879e-09	IGFBP1, IGFBP4, IGFBP3, HTRA3, HTRA4, IGFBP2, CRIM1, HTRA1, WISP1, CYR61, WISP2, CTGF, IGFBPL1, NOV, IGFBP7, IGFBP6	2008	23	17446	6.044	2.27826e-06	2.5314e-07	2.43504e-07
GOTERM_MF_DIRECT	GO:0005518	collagen binding	1.10076	1.73157e-09	LRRC15, SPARC, TNXB, ECM2, PDGFB, NID1, ANTXR1, THBS4, COCH, MRC2, ABI3BP, CTSK, SERPINH1, SRGN, VWF, LUM, ITGA1, PCOLCE, PODN, ASPN, DCN, ITGA11, CSPG4, TGFBI, ITGA9, DDR2	2008	59	17446	3.82872	2.54713e-06	2.54713e-07	2.45017e-07
GOTERM_MF_DIRECT	GO:0030246	carbohydrate binding	2.45555	1.05301e-08	GALNT16, GALNT15, CLEC4N, CLEC10A, CLEC14A, PYGM, PYGL, SIGLECH, ASGR1, FCNA, MRC2, LGALS3, LGALS1, STBD1, CLEC5A, MRC1, OLR1, LGALS9, CLEC1B, CD34, LGALS7, MBL1, CD33, MBL2, MGL2, CD93, WBSCR17, VCAN, MAG, EMCN, CLEC4D, CD302, ZP3, CLEC4E, PLA2R1, FREM1, CLEC4G, CHODL, CLEC4A1, APCS, CLEC4A3, CLEC4A2, SELPLG, ITLN1, CLEC3B, CILP2, GALNT5, GFPT2, REG4, CD209G, PRG2, LAYN, SELL, GALM, CD248, SIGLE…	2008	229	17446	2.20052	1.54897e-05	1.34272e-06	1.2916e-06
GOTERM_MF_DIRECT	GO:0005102	receptor binding	3.72566	1.09535e-08	CD86, WNT2B, SERPINE2, SCT, SERPINE1, PLAT, FGF1, PANX1, FGF5, CDH5, NPPC, GJA1, C1QTNF2, FGF7, RSPO1, LGALS9, EPHB2, MBL2, PDGFRB, FGB, FGA, AMN, EDN1, ITGA1, WNT5A, F2R, FGG, PLAUR, ICOSL, NRG2, NGF, F2, GIP, RGMA, REN1, HCK, AR, ZAP70, MAG, TYROBP, ACOX2, AGXT, GAS6, SLC27A2, LAMA5, LAMA2, LAMA1, LAMA4, NXPH4, PDGFB, KCNA5, PLG, MCHR1, KNG1, FYB, EFNB2, WNT6, WNT11, SRPX2, TESPA1, NTF3, SLIT1,…	2008	412	17446	1.85574	1.61125e-05	1.34272e-06	1.2916e-06
GOTERM_MF_DIRECT	GO:0004222	metalloendopeptidase activity	1.60881	2.15742e-08	PAPLN, ADAMTS12, ADAMTS10, MMP23, ADAMTS4, ADAMTS16, ADAMTSL1, ADAMTS5, ADAMTS15, ADAMTS2, ADAMTS14, ADAMTS3, ADAMTSL5, ADAMTS19, ADAMTSL4, ADAMTS1, ADAMTSL2, MMP28, ADAMTS17, ADAMTS8, ADAMTS9, ADAMTS7, MMP2, ADAM33, MMP8, MMP9, ADAMTS20, ADAM19, MMP11, MMP14, MMP16, MEP1A, PAPPA, MMP17, ADAM12, MMP19, ADAM8, TRABD2B	2008	123	17446	2.68417	3.17351e-05	2.4412e-06	2.34826e-06
GOTERM_MF_DIRECT	GO:0008083	growth factor activity	1.77815	2.73709e-08	GMFG, PDGFB, CXCL1, PTN, FGF1, THBS4, WISP2, CTGF, FGF5, FGF7, EFEMP1, MDK, NTF3, TIMP1, GDF10, TGFB2, TGFB1, MIA, TGFB3, HGF, IL34, IGF2, OSM, LIF, VEGFC, IGF1, INHBA, NGF, GDF6, INHBC, BMP6, BMP5, BMP4, IL6, BMP2, CXCL12, NOV, KITL, FGF18, OGN, ANGPTL3, FGF10	2008	145	17446	2.5166	4.02618e-05	2.8759e-06	2.76642e-06
GOTERM_MF_DIRECT	GO:0005539	glycosaminoglycan binding	0.592718	4.95851e-08	VIT, SERPINE2, MAMDC2, BGN, NDNF, PTN, PRSS34, DCN, TGFBR2, SMOC2, EGFLAM, CCDC80, ABI3BP, ENG	2008	21	17446	5.79216	7.2937e-05	4.86264e-06	4.67753e-06
GOTERM_MF_DIRECT	GO:0050840	extracellular matrix binding	0.677392	6.7292e-08	OLFML2B, SPARC, ITGB3, ELN, BGN, SSC5D, OLFML2A, NID1, THBS1, FBLN2, CYR61, DCN, ADAMTS5, ADAMTS15, CD248, TGFBI	2008	28	17446	4.96471	9.89817e-05	6.18666e-06	5.95114e-06
GOTERM_MF_DIRECT	GO:0005044	scavenger receptor activity	0.889077	1.02623e-07	SBSPON, MSR1, CD163, TINAGL1, SCARA5, TMPRSS5, FCRLS, CFI, LOXL3, LOXL4, SSC5D, PRSS12, MARCO, STAB1, ACKR4, HHIPL1, ACKR3, ACKR2, ENPP3, SCARF1, GM933	2008	48	17446	3.80111	0.000150946	8.87987e-06	8.54182e-06
GOTERM_MF_DIRECT	GO:0004713	protein tyrosine kinase activity	1.52413	1.51204e-07	CSF1R, FLT1, FLT3, FLT4, TTK, MST1R, EDNRA, ERBB2, KDR, EPHB2, EPHB1, EPHB4, EPHB3, LYN, EPHA5, PDGFRB, EPHA4, PDGFRA, TIE1, MERTK, BMX, D8ERTD82E, FGR, ZAP70, HCK, FES, AXL, KIT, BTK, TYRO3, TEK, EPHA3, FGFR2, EPHA2, DDR2, FGFR1	2008	121	17446	2.58493	0.000222396	1.23567e-05	1.18863e-05
GOTERM_MF_DIRECT	GO:0008237	metallopeptidase activity	1.77815	5.18353e-07	PAPLN, ADAMTS12, CPZ, ADAMTS10, MMP23, ADAMTS4, ADAMTS16, ADAMTSL1, ADAMTS5, ADAMTS15, ADAMTS2, ADAMTSL5, ADAMTS19, ADAMTS1, ADAMTSL3, ADAMTSL2, NAALAD2, CPXM1, ADAMTS8, ADAMTS9, CPA4, ADAMTS7, CPA3, ACE, MMP2, ADAM33, MMP8, MMP9, ADAMTS20, ADAM19, MMP11, MMP14, MMP16, MEP1A, PAPPA, MMP17, ADAM12, DPEP2, DPEP1, MMP19, ADAM8, TRABD2B	2008	160	17446	2.28066	0.000762206	4.01314e-05	3.86036e-05
GOTERM_MF_DIRECT	GO:0004252	serine-type endopeptidase activity	2.11685	1.19865e-06	PRSS1, TPSB2, MCPT8, 1810009J06RIK, MCPT4, HP, PLAT, PRSS23, PCSK5, PLAU, CASP3, CTSH, CTSG, GM2663, TPSAB1, CTSC, RHBDF1, HGF, MMP2, PRSS57, F2, MMP8, PRSS12, MMP9, MMP19, PRTN3, MASP1, CFB, LTF, TMPRSS7, TMPRSS5, TMPRSS6, HTRA3, CFI, HTRA4, HTRA1, PLG, KLK8, PRSS50, ELANE, C1RB, C1RA, F10, CMA1, F12, GZMB, PRSS35, PRSS34, PROC, FAP	2008	212	17446	2.04911	0.00176166	8.81606e-05	8.48044e-05
GOTERM_MF_DIRECT	GO:0002020	protease binding	1.39712	1.97722e-06	RYR1, ECM1, LRP1, SERPINC1, ITGB3, SERPINE1, BRCA2, TNF, ADAMTS4, SERPINA1A, PANX1, SERPINA1C, CASP12, ADAMTSL4, CASP3, BDKRB2, TIMP2, TIMP3, TIMP1, ELANE, MBL1, MBL2, ANXA2, VWF, SERPINF2, FN1, HSPG2, FAP, SELL, KIT, CD28, BCL2, LCN2	2008	117	17446	2.45053	0.00290427	0.0001385	0.000133227
GOTERM_MF_DIRECT	GO:0005125	cytokine activity	2.07451	3.75178e-06	CXCL1, TNF, CXCL2, CXCL5, TNFSF11, TIMP1, PGLYRP1, CER1, SECTM1A, EDN1, WNT5A, IL16, GREM1, IL1A, LTB, CCL12, CCL11, CCL9, CCL7, CCL6, CCL4, CCL3, CCL2, WNT2, CMTM7, GDF10, CCL24, IL33, TGFB2, TGFB1, CMTM3, TSLP, TGFB3, CMTM5, IL34, OSM, LIF, GDF1, INHBA, GDF6, INHBC, BMP6, BMP5, BMP4, IL6, BMP2, CXCL12, KITL, PF4	2008	214	17446	1.98936	0.00550367	0.000250857	0.000241307
GOTERM_MF_DIRECT	GO:0005096	GTPase activator activity	2.20152	5.1863e-06	ARHGAP11A, PRR5, HTR2B, ARHGAP36, ARHGAP4, PREX2, RGS5, SYDE1, ARHGAP42, ARHGDIB, TBC1D10C, RGS6, ARHGEF15, STARD8, HMHA1, ARAP3, TBC1D2B, TIAM2, ARHGAP10, DEPDC1B, ACAP1, DEPDC1A, RASA3, CDC42EP2, RIN3, DOCK2, DOCK1, RGS18, RGS19, RGS14, ARHGAP19, RASAL1, ASAP2, THY1, ARHGAP15, RASGRP3, ARHGAP22, WNT11, SH3BP1, SRGAP3, ECT2, JUN, ARHGAP29, ARHGAP28, ARHGAP27, ADAP1, ARHGAP25, ARHGAP31, ARHGAP30,…	2008	235	17446	1.92251	0.00760004	0.000331698	0.00031907
GOTERM_MF_DIRECT	GO:0042803	protein homodimerization activity	5.67316	5.44634e-06	SCARB1, PLVAP, OLFML2B, PRDM6, HP, OLFML2A, NPPC, LGALS1, CER1, PDGFRA, CUBN, DGAT2, ACTN3, SLC11A1, SERPINF2, COL23A1, TPM1, MYO7A, HOGA1, MAF, CHMP4C, TIMELESS, S100A6, MASP1, KIF20B, ABCG2, TRIM12C, CSF1R, GYPA, NRN1, SHMT1, NPR3, MGST1, PDGFB, TWIST1, FAM109B, BHLHE22, CORO1A, FBLN5, FLRT3, S100A16, APOE, ECT2, FZD1, WWTR1, TGFB2, JUN, CADM3, TGFB1, FZD4, CAV2, PDE2A, NR2F2, GDF6, BMP4, NR4A1…	2008	798	17446	1.45893	0.00797958	0.000333815	0.000321107
GOTERM_MF_DIRECT	GO:0001968	fibronectin binding	0.592718	6.77957e-06	LRRC15, ITGB3, IGFBP3, MMP2, TNC, FBLN1, SSC5D, THBS1, MMP9, THBS4, CTGF, CCDC80, CTSK, MFAP2	2008	29	17446	4.19433	0.00992322	0.00039891	0.000383724
GOTERM_MF_DIRECT	GO:0048407	platelet-derived growth factor binding	0.381033	9.76699e-06	PDGFRB, COL1A1, PDGFRA, COL3A1, COL1A2, COL5A1, COL4A1, COL6A1, PDGFB	2008	12	17446	6.51619	0.0142646	0.000552586	0.00053155
GOTERM_MF_DIRECT	GO:0008233	peptidase activity	3.93734	1.12898e-05	TPSB2, MCPT8, MCPT4, PLAT, CPZ, PRSS23, PCSK5, ADAMTS4, ADAMTSL1, MMP23, ADAMTS5, ADAMTS2, CASP7, ADAMTS3, CASP12, ADAMTSL4, PLAU, ADAMTS1, ADAMTSL3, CASP3, CTSK, ADAMTSL2, CTSH, CPXM1, CTSG, TPSAB1, ADAMTS8, CTSE, CTSC, ADAMTS7, CPA3, MMP2, PRSS57, F2, MMP8, PRSS12, MMP9, ADAMTS20, ADAM19, REN1, MMP11, MMP14, ESPL1, MMP16, MEP1A, PAPPA, MMP17, ADAM12, DPEP2, DPEP1, MMP19, PRTN3, ADAM8, MASP1, TR…	2008	516	17446	1.5659	0.0164703	0.000615087	0.000591671
GOTERM_MF_DIRECT	GO:0030414	peptidase inhibitor activity	1.35478	1.74283e-05	ITIH5, ITIH3, WFDC10, SERPINE2, SERPINC1, PZP, SERPINE1, PAPLN, WFIKKN2, WFDC1, TFPI, KNG1, WFDC2, SERPINA1C, GPC3, TIMP2, TIMP3, TIMP1, WFDC15B, SPINK2, SERPIND1, SERPINF2, SERPINA3M, NGF, SERPINB8, STFA2, NGP, CD109, BIRC5, SERPING1, PI16, UMODL1	2008	123	17446	2.26036	0.0253114	0.000915608	0.000880751
GOTERM_MF_DIRECT	GO:0004872	receptor activity	1.69348	2.26381e-05	GRIA1, NOTCH3, ROBO4, RAMP3, TNFRSF13B, ITGB3, IGSF1, ITGB2, GRIK3, LRP2, FPR2, ANTXR2, ANTXR1, AMOT, CXCR3, MRC1, BTLA, ITGB7, EPHB2, GRIA3, GRIA4, STRA6, CUBN, GRID2, CADM3, PAQR4, CD180, TNFRSF19, RTN4RL2, GRIN2C, GFRA2, TGFBR2, GFRA4, P2RX7, CD200R1, CD48, TLR7, TEK, PLA2R1, CLEC4E	2008	172	17446	2.02052	0.0327526	0.0011483	0.00110458
GOTERM_MF_DIRECT	GO:0042056	chemoattractant activity	0.508044	4.34121e-05	BMP4, LGALS3, FGF7, CXCL12, HGF, SAA3, NTF3, HMGB2, CCL3, PDGFB, VEGFC, FGF10	2008	25	17446	4.17036	0.0618642	0.00205997	0.00198155
GOTERM_MF_DIRECT	GO:0043395	heparan sulfate proteoglycan binding	0.508044	4.34121e-05	GREM1, SEMA5A, PTPRC, ITGAM, LIPC, CFH, FST, SLIT1, GPC3, GPC2, SLIT2, AGRN	2008	25	17446	4.17036	0.0618642	0.00205997	0.00198155
GOTERM_MF_DIRECT	GO:0050431	transforming growth factor beta binding	0.42337	6.37146e-05	ACVRL1, TGFB3, CD109, LTBP4, CD36, AGRN, THBS1, LTBP1, TGFBR2, ENG	2008	18	17446	4.8268	0.0894688	0.00292888	0.00281738
GOTERM_MF_DIRECT	GO:0050839	cell adhesion molecule binding	0.889077	0.000101385	FGB, FGA, POSTN, CADM3, VCAM1, ITGB3, FGG, ITGB2, MSN, NRXN2, ITGAL, CD1D1, SELL, CDHR2, ITGA7, ITGB7, CDHR5, ADAM8, ITGA5, TGFBI, FGFR1	2008	71	17446	2.56976	0.138555	0.00441409	0.00424604
GOTERM_MF_DIRECT	GO:0045499	chemorepellent activity	0.508044	0.000102025	SEMA5A, SEMA5B, SEMA6A, FLRT2, SEMA3D, FLRT3, SEMA3A, SEMA4C, SEMA3B, APOA1, SLIT2, SEMA3F	2008	27	17446	3.86144	0.139367	0.00441409	0.00424604
GOTERM_MF_DIRECT	GO:0008144	drug binding	1.18544	0.000133868	TOP2A, CHRM2, CHRNA3, CHRNA4, NR1I2, HTR2B, HMGB2, CXCR4, PYGM, PYGL, CNR1, GABRA1, CHRNB4, ACE, PDE2A, CYP4B1, ABCC9, FABP1, SFRP1, P2RX5, SMO, P2RX2, ALB, FSCN1, RARB, TLR8, TLR7, FOLR2	2008	112	17446	2.17206	0.178755	0.0056263	0.00541211
GOTERM_MF_DIRECT	GO:0008236	serine-type peptidase activity	1.52413	0.000184055	TPSB2, MCPT8, TMPRSS7, TMPRSS5, TMPRSS6, MCPT4, HTRA3, CFI, HTRA4, HTRA1, PLAT, PLG, KLK8, PRSS23, PCSK5, RELN, PLAU, CTSG, TPSAB1, ELANE, C1RB, C1RA, F10, CMA1, F12, GZMB, PRSS57, F2, PRSS12, PRSS34, PROC, FAP, PRTN3, MASP1, CFB, LTF	2008	163	17446	1.91888	0.237208	0.00752068	0.00723437
GOTERM_MF_DIRECT	GO:0008009	chemokine activity	0.677392	0.000209229	CCL24, CCL12, CCL11, GM13304, CXCL1, CXCL2, CXCL5, CCL9, CXCL12, CCL7, CCL6, CCL4, CCL3, CCL2, CCL21A, PF4	2008	48	17446	2.89608	0.264944	0.00831827	0.0080016
GOTERM_MF_DIRECT	GO:0003777	microtubule motor activity	0.889077	0.00027883	DNAH1, KIFC5B, KIF14, DNAH7A, KIF23, DNAH9, KIF11, KIF22, KIF7, KIF6, KIF15, KIF4, CENPE, KIF18A, KIF18B, KIF26A, KIFC1, KIF26B, KIF2C, KIF20A, KIF20B	2008	76	17446	2.4007	0.336493	0.0107937	0.0103827
GOTERM_MF_DIRECT	GO:0017147	Wnt-protein binding	0.508044	0.000308135	FZD1, SFRP4, SFRP1, FZD2, SFRP2, SMO, WIF1, FZD4, LRP5, APCDD1, TRABD2B, CTHRC1	2008	30	17446	3.4753	0.364496	0.0116222	0.0111798
GOTERM_MF_DIRECT	GO:0003690	double-stranded DNA binding	1.31245	0.000316498	GATA6, HMGB2, AFF3, MNDAL, RAD51AP1, MYC, TDG, JUNB, EGR1, FOXD3, JUN, IFI204, IFI205, IFI203, PAX4, MND1, FOS, IFI202B, KLF4, POU3F4, RAD51B, NEIL3, KLF6, RAD51, MAF, WT1, NFIB, FEV, DMC1, FOSB, JDP2	2008	136	17446	1.98041	0.372268	0.0116392	0.0111961
GOTERM_MF_DIRECT	GO:0044212	transcription regulatory region DNA binding	1.9475	0.000325687	YAP1, FOXC2, FOXC1, CITED1, TCF7, PRDM5, GATA6, HMGB2, GATA5, BRCA1, IKZF1, GATA3, FOXM1, GLI1, TNF, GLI2, WNT11, SOX17, SOX18, BASP1, TBX21, MYBL2, SOX6, SOX7, ZFP541, SOX5, EGR1, FOXD3, EGR2, JUN, TCF7L1, MEF2C, BCL11A, FOXF1, WNT5A, ARID5B, FOS, KLF4, SMAD6, SOX10, AR, REST, WT1, TAL1, HAND2, HAND1	2008	233	17446	1.71528	0.380699	0.011685	0.0112402
GOTERM_MF_DIRECT	GO:0005021	vascular endothelial growth factor-activated receptor activity	0.254022	0.000344639	PDGFRA, NRP1, NRP2, FLT1, FLT4, KDR	2008	7	17446	7.44707	0.397731	0.0120706	0.011611
GOTERM_MF_DIRECT	GO:0004601	peroxidase activity	0.508044	0.000428339	GPX2, PXDN, GPX8, GPX7, HBA-A2, HBB-BT, HBA-A1, HBB-BS, PTGS2, MPO, CYGB, PTGS1	2008	31	17446	3.36319	0.467526	0.0145199	0.0139672
GOTERM_MF_DIRECT	GO:0005003	ephrin receptor activity	0.338696	0.000434315	EPHA5, EPHA4, EPHB2, EPHB1, EPHB4, EPHA3, EPHB3, EPHA2	2008	14	17446	4.96471	0.472189	0.0145199	0.0139672
GOTERM_MF_DIRECT	GO:0042802	identical protein binding	4.2337	0.000543299	ETS1, TNF, CLDN1, SKP2, CUBN, SOX10, CLDN5, SFRP1, CLDN4, TYROBP, BTK, TRIM12C, SHMT1, LYZ2, MGST1, PDGFB, FBLN1, CORO1A, APOH, CEP72, APOE, JUN, TGFB3, CAV1, FN1, CIDEB, INHBA, SMAD6, NDC80, COL1A1, SDK1, RALYL, GRIN3A, COL1A2, ALB, BCL2, FGFR1, GPSM2, RYR2, ACY3, FLT1, ITGB3, LRRK1, LECT2, FHL2, MCM10, PTPRG, SERPINA1A, C1QTNF3, C1QTNF2, SERPINA1C, CHAF1A, C1QTNF6, C1QTNF5, NEFL, TK1, CTSC, VWF…	2008	625	17446	1.39012	0.550406	0.0177598	0.0170837
GOTERM_MF_DIRECT	GO:0004871	signal transducer activity	4.36071	0.000571194	CHRM2, GJA1, EDNRA, GPR176, CYSLTR1, EDNRB, HTR7, LGALS1, OLFR78, C3AR1, PLCE1, RGS6, CMKLR1, PDGFRB, SECTM1A, F2R, ACAP1, SMO, LTB4R1, APLNR, VOPP1, AGTR2, ADCYAP1R1, CALCRL, GPR88, C5AR1, LPAR1, FPR1, GPR83, LPAR4, FPR2, MCHR1, CRHR2, HRH2, TBXA2R, TSPAN6, ECT2, FZD1, CCR1, GPR17, FZD2, FZD4, NMBR, GNG11, GNG13, BST2, GPR183, NMUR1, CSPG4, PLCH2, ECM1, HTR2B, GPR20, PTH1R, LSP1, ADRA1B, CD3E, A…	2008	648	17446	1.381	0.568491	0.0182658	0.0175704
GOTERM_MF_DIRECT	GO:0003779	actin binding	2.54022	0.000685696	WIPF1, AVIL, GMFG, LMOD1, LSP1, PPP1R18, MYLK, PANX1, PSTPIP1, COTL1, TNS1, GAS2L3, TRPC6, ACTN3, TPM2, TPM1, MYO7B, AFAP1, MYO7A, ARC, INF2, DAAM2, TNNT2, FSCN1, MYH8, HCLS1, DBN1, HPCA, NEXN, CXCR4, CAPG, NOD2, CORO1A, AIF1, CNN2, CNN1, ABLIM3, MICAL1, NRAP, FLNA, TNNI2, MYH11, DMD, FLNC, CAP2, MARCKSL1, MSN, GCSAM, AIF1L, FMNL3, ANLN, FMNL1, KIF18A, MARCKS, PARVG, TRPV4, FXYD5, MYO1H, MYO1F, M…	2008	338	17446	1.54229	0.635418	0.0210383	0.0202374
GOTERM_MF_DIRECT	GO:0097110	scaffold protein binding	0.677392	0.000686498	RYR2, GRID2, NLRP1A, CAV2, TREM2, KCNA5, TREM1, CACNA1H, CIT, ADCY5, CACNA1G, PANX1, GJA1, NOS1, SCN5A, VIM	2008	53	17446	2.62287	0.635848	0.0210383	0.0202374
GOTERM_MF_DIRECT	GO:0001077	transcriptional activator activity, RNA polymerase II core promoter proximal region sequence-specific binding	2.11685	0.000799608	SPI1, TCF21, MEOX2, GLI2, SOX18, MYC, SIX2, MYB, MYBL2, HOXA7, PITX2, JUNB, HOXA5, TEAD4, MEF2C, MYOCD, EBF1, EBF2, EBF3, SOX11, FOS, EBF4, AR, ELF4, HAND2, CREB5, FOXC2, EPAS1, TWIST1, GATA3, GATA2, EGR1, EGR2, JUN, BCL11B, POU2F2, KLF4, FLI1, PHOX2B, BATF, PHOX2A, HEYL, NR4A1, MAFB, NR4A3, NFIA, WT1, NFIB, TLX1, FOSB	2008	270	17446	1.60893	0.691704	0.0239875	0.0230743
GOTERM_MF_DIRECT	GO:0043394	proteoglycan binding	0.254022	0.000831654	COL5A1, COL5A3, CTSK, SLIT2, PTN, NID1	2008	8	17446	6.51619	0.705911	0.0239875	0.0230743
GOTERM_MF_DIRECT	GO:0050786	RAGE receptor binding	0.254022	0.000831654	FPR1, HMGB2, FPR2, S100B, S100A9, S100A8	2008	8	17446	6.51619	0.705911	0.0239875	0.0230743
GOTERM_MF_DIRECT	GO:0005216	ion channel activity	1.4818	0.000879519	GRIA1, RYR1, GABRB2, RYR2, GABRB1, CHRNA3, CHRNA4, KCNA1, GRIK3, KCNA3, CLCNKB, KCNA5, ITPR3, CACNA1H, GJC1, SCN5A, GRIA3, GRIA4, GABRA1, GRID2, CHRNB4, TRPC6, TRPC3, KCNH8, GRIN2C, P2RX7, P2RX6, GJD3, FXYD3, P2RX2, TRPV4, FXYD7, FXYD6, FXYD5, KCNK3	2008	170	17446	1.78876	0.725922	0.0248802	0.0239331
GOTERM_MF_DIRECT	GO:0004016	adenylate cyclase activity	0.296359	0.00114754	GUCY1A3, GUCY1B3, ADCY4, ADCY2, ADCY1, ADCY7, ADCY5	2008	12	17446	5.06814	0.815297	0.0318498	0.0306373
GOTERM_MF_DIRECT	GO:0030169	low-density lipoprotein particle binding	0.338696	0.00117534	MSR1, SCARB1, LIPC, STAB1, CDH13, CD36, THBS1, SCARF1	2008	16	17446	4.34412	0.822705	0.0320171	0.0307982
GOTERM_MF_DIRECT	GO:0043236	laminin binding	0.42337	0.00173875	LGALS3, LRRC15, ECM1, TINAGL1, LGALS1, ITGA7, SSC5D, NID1, THBS1, ITGA9	2008	26	17446	3.34163	0.922689	0.0465036	0.0447332
GOTERM_MF_DIRECT	GO:0008574	ATP-dependent microtubule motor activity, plus-end-directed	0.296359	0.00192451	KIF18A, KIF18B, KIF26B, KIF14, KIF11, KIF20B, KIF4	2008	13	17446	4.67829	0.941204	0.0496658	0.047775
GOTERM_MF_DIRECT	GO:0017154	semaphorin receptor activity	0.296359	0.00192451	NRP1, NRP2, PLXND1, PLXNB3, PLXNC1, MST1R, PLXNA4	2008	13	17446	4.67829	0.941204	0.0496658	0.047775
GOTERM_MF_DIRECT	GO:0030492	hemoglobin binding	0.211685	0.00216185	CUBN, HP, HBB-BT, LRP2, HBB-BS	2008	6	17446	7.24021	0.958561	0.0530015	0.0509837
GOTERM_MF_DIRECT	GO:0071813	lipoprotein particle binding	0.211685	0.00216185	CDH13, APOA1, APOE, CD36, GPIHBP1	2008	6	17446	7.24021	0.958561	0.0530015	0.0509837
GOTERM_MF_DIRECT	GO:0004859	phospholipase inhibitor activity	0.211685	0.00216185	ANXA1, PINLYP, ANXA2, ANXA3, ANGPTL3	2008	6	17446	7.24021	0.958561	0.0530015	0.0509837
GOTERM_MF_DIRECT	GO:0000977	RNA polymerase II regulatory region sequence-specific DNA binding	1.73582	0.00241557	DLX1, DLX2, FOXC1, NR1I2, GATA5, AEBP1, IKZF1, GATA3, GLI1, BARX1, ASCL2, GLI3, LYL1, GBX2, PLAGL1, MSX1, RXRG, JUNB, E2F7, PKNOX2, ZFP711, OSR2, EGR1, FOXD3, MEF2C, EGR4, FOXF2, FOXF1, LMO2, ARID5B, EBF4, PHOX2B, PHOX2A, POU3F4, HAND2, ELF5, SNAI1, RARB, LMX1B, HOXD9, HOXD8	2008	221	17446	1.61185	0.971493	0.0582508	0.0560332
GOTERM_MF_DIRECT	GO:0004867	serine-type endopeptidase inhibitor activity	1.10076	0.00317649	ITIH5, ITIH3, SERPINE2, SERPINC1, PZP, SERPINE1, PAPLN, WFIKKN2, WFDC1, TFPI, SERPINA6, WFDC2, SERPINA1A, SERPINA1C, SERPINH1, WFDC17, SPINK2, SERPIND1, SERPINF1, SERPINF2, CRIM1, SERPINA3M, SERPINB8, SERPINB6B, CD109, SERPING1	2008	123	17446	1.83654	0.990722	0.0753649	0.0724958
GOTERM_MF_DIRECT	GO:0001786	phosphatidylserine binding	0.508044	0.00356491	GSDMD, SCARB1, GAP43, JPH2, SDPR, AXL, TIMD4, MFGE8, GAS6, THBS1, PLCD1, SYTL2	2008	39	17446	2.67331	0.99477	0.0819373	0.078818
GOTERM_MF_DIRECT	GO:0004857	enzyme inhibitor activity	0.508044	0.00356491	UGT1A1, WFIKKN2, TIMP2, ANGPTL3, CRIM1, TIMP3, TIMP1, ANGPTL4, 1300017J02RIK, NGF, RENBP, CD55	2008	39	17446	2.67331	0.99477	0.0819373	0.078818
GOTERM_MF_DIRECT	GO:0004896	cytokine receptor activity	0.550381	0.00395645	CX3CR1, CSF3R, FLT3, MPL, OSMR, IL2RG, EPOR, IL1RL2, IL2RB, IL21R, GM13305, IL7R, IL11RA1	2008	45	17446	2.50994	0.997066	0.0881809	0.0848239
GOTERM_MF_DIRECT	GO:0004869	cysteine-type endopeptidase inhibitor activity	0.550381	0.00395645	CTLA2B, AHSG, BC100530, BC117090, KNG1, STFA2L1, WFDC2, STFA2, STFA3, PTTG1, NGP, BIRC5, GM5483	2008	45	17446	2.50994	0.997066	0.0881809	0.0848239
GOTERM_MF_DIRECT	GO:0008289	lipid binding	1.98984	0.00410455	CRABP2, NCF1, CRABP1, NCF4, DYSF, LPAR4, PTGS2, LTC4S, SERPINA6, PTGS1, BAIAP2L2, LIPC, CYTH4, APOH, FFAR4, CD36, APOE, PLTP, CD55, GPIHBP1, PAQR7, APOL11B, STARD8, APOA2, APOA1, APOC3, APOA4, FABP1, RBP7, AR, FABP2, FABP4, MELK, RBP2, FABP5, FES, SDPR, DLC1, CYP21A1, APOC2, FABP7, ALB, RBP1, DOK7, BTK, MGLL, MYO1G	2008	270	17446	1.5124	0.997643	0.0901162	0.0866856
GOTERM_MF_DIRECT	GO:0008035	high-density lipoprotein particle binding	0.211685	0.00458481	SCARB1, APOA2, APOA1, CD36, GPIHBP1	2008	7	17446	6.20589	0.99884	0.0991802	0.0954045
GOTERM_MF_DIRECT	GO:0000981	RNA polymerase II transcription factor activity, sequence-specific DNA binding	1.39712	0.00484542	DLX1, GATA6, TWIST1, HIF3A, BHLHE22, FOXM1, ETS1, LYL1, FOXS1, SOX17, SOX18, PLAGL1, SOX8, MYBL2, PITX2, SOX5, PKNOX2, GM5294, FOXD3, JUN, MEF2C, LMO2, SOX10, NFATC4, REST, MAF, NFIA, TAL1, NFIB, ELF4, FEV, ELF5, ERG	2008	174	17446	1.64777	0.999211	0.103299	0.0993662
GOTERM_MF_DIRECT	GO:0016918	retinal binding	0.254022	0.00509439	RBP7, CRABP2, RBP2, ALDH1A2, CRABP1, RBP1	2008	11	17446	4.73904	0.999454	0.107055	0.102979
GOTERM_MF_DIRECT	GO:0004950	chemokine receptor activity	0.338696	0.00526368	CCR1, CXCR3, ACKR4, CXCR4, CCR7, ACKR2, CXCR6, CCR3	2008	20	17446	3.4753	0.999575	0.10754	0.103446
GOTERM_MF_DIRECT	GO:0016849	phosphorus-oxygen lyase activity	0.338696	0.00526368	GUCY1A3, GUCY1B3, BST1, ADCY4, ADCY2, ADCY1, ADCY7, ADCY5	2008	20	17446	3.4753	0.999575	0.10754	0.103446
GOTERM_MF_DIRECT	GO:0031720	haptoglobin binding	0.169348	0.00555785	HBA-A2, HBB-BT, HBA-A1, HBB-BS	2008	4	17446	8.68825	0.999725	0.111995	0.107731
GOTERM_MF_DIRECT	GO:0003705	transcription factor activity, RNA polymerase II distal enhancer sequence-specific binding	0.677392	0.00606225	FOXC2, MEF2C, FOXC1, JUN, SPI1, FOXF2, FOXF1, KCNH8, GATA6, GATA5, SOX11, GLI1, SOX10, SOX17, SNAI2, SOX7	2008	65	17446	2.13865	0.99987	0.120508	0.11592
GOTERM_MF_DIRECT	GO:0015026	coreceptor activity	0.296359	0.00662462	CD4, RAMP3, IGSF1, ACKR3, CXCR6, RGMA, GFRA4	2008	16	17446	3.80111	0.999943	0.128221	0.12334
GOTERM_MF_DIRECT	GO:0008307	structural constituent of muscle	0.296359	0.00662462	SYNM, PDLIM3, KRT19, NEXN, MYH11, DMD, JPH1	2008	16	17446	3.80111	0.999943	0.128221	0.12334
GOTERM_MF_DIRECT	GO:0030215	semaphorin receptor binding	0.338696	0.00712316	SEMA5A, SEMA5B, SEMA6A, SEMA3D, SEMA3A, SEMA4C, SEMA3B, SEMA3F	2008	21	17446	3.30981	0.999973	0.13608	0.1309
GOTERM_MF_DIRECT	GO:0019841	retinol binding	0.254022	0.00791356	RBP7, CRABP2, RBP2, CRABP1, RBP1, LRAT	2008	12	17446	4.34412	0.999992	0.145511	0.139971
GOTERM_MF_DIRECT	GO:0044548	S100 protein binding	0.254022	0.00791356	ANXA2, AHNAK, S100A6, FGF1, S100B, KCNK3	2008	12	17446	4.34412	0.999992	0.145511	0.139971
GOTERM_MF_DIRECT	GO:0031994	insulin-like growth factor I binding	0.254022	0.00791356	IGFBP1, IGFBP4, ITGB3, IGFBP3, IGFBP2, IGFBP6	2008	12	17446	4.34412	0.999992	0.145511	0.139971
GOTERM_MF_DIRECT	GO:0030674	protein binding, bridging	0.635055	0.0082729	FGB, TRIM12C, FGA, SYNM, ANXA1, ACTN3, CAV2, CAV1, FGG, EVPL, TRIM6, COL1A2, TNNT2, FSCN1, NEFL	2008	61	17446	2.13645	0.999995	0.147773	0.142147
GOTERM_MF_DIRECT	GO:0001085	RNA polymerase II transcription factor binding	0.592718	0.00832448	SPI1, GATA5, GATA3, KLF4, GATA2, TBX3, TBX18, AR, GFI1B, TAL1, GSC, ID4, HCLS1, ZFPM2	2008	55	17446	2.21155	0.999995	0.147773	0.142147
GOTERM_MF_DIRECT	GO:0031995	insulin-like growth factor II binding	0.211685	0.00833796	IGFBP1, IGFBP4, IGFBP3, IGFBP2, IGFBP6	2008	8	17446	5.43015	0.999996	0.147773	0.142147
GOTERM_MF_DIRECT	GO:0046982	protein heterodimerization activity	3.30229	0.00893585	TOP2A, GUCY1B3, ITGAM, KCNK9, ITGB2, CD3G, IKZF1, ITGAL, ADRA1B, CD3E, ADRA1A, SMC2, PANX1, SOX17, SOX18, MYC, HEY2, BDKRB2, NEFL, SOX8, SOX6, SOX5, GUCY1A3, MEF2C, CHRNB4, UGT1A1, HGF, APOA2, CYBA, FOS, UGT1A6A, ANO2, UGT1A6B, AGTR1A, MAF, TAL1, HAND2, HAND1, TYRO3, TIMELESS, ITGA7, TLR6, JDP2, ZFP423, CHRNA3, NRN1, CHRNA4, EPAS1, PDGFB, TWIST1, ADCY2, LTC4S, CENPA, ADCY5, ERBB2, PRPH, FZD1, AOC…	2008	514	17446	1.31845	0.999998	0.156484	0.150527
GOTERM_MF_DIRECT	GO:0005160	transforming growth factor beta receptor binding	0.508044	0.00953431	GDF10, BMP4, TGFB2, BMP2, TGFB1, TGFB3, GDF1, INHBA, GDF6, INHBC, BMP6, BMP5	2008	44	17446	2.36952	0.999999	0.164368	0.158111
GOTERM_MF_DIRECT	GO:0008134	transcription factor binding	2.32854	0.00960956	HMGB2, FHL2, TRIM6, SOX17, MYC, SIX2, HEY2, SOX8, HOXA7, PITX2, CD34, JUNB, MYOCD, LMO4, FOS, EBF4, TMEM173, SOX10, AR, MDFIC, HAND2, HAND1, AGTR2, ZFPM2, TRIB2, MDFI, FOXC1, EPAS1, GATA6, TWIST1, GATA3, GATA2, MNDAL, TDG, ATOH8, FLNA, NLRP3, ZFP541, EGR1, JUN, FOXF2, IFI204, IFI205, IFI203, KLF4, SORBS3, NFATC4, NR4A1, REST, CENPF, MAFB, NFIA, ID1, BCL2, ID3	2008	342	17446	1.39723	0.999999	0.164368	0.158111
GOTERM_MF_DIRECT	GO:0003700	transcription factor activity, sequence-specific DNA binding	5.29213	0.0099891	SPI1, IKZF1, ETS1, SOX21, SOX17, SOX18, MYC, MYB, HOXA3, HOXA2, SOX8, HOXA7, PITX2, SOX6, JUNB, SOX7, HOXA5, HOXA4, ZFP286, SOX5, MEF2C, WNT5A, EBF1, SOX11, SOX10, HIC1, POU3F4, MYCL, AR, RFX8, MAF, HOXB4, HOXB2, LMX1B, ERG, HOXB7, HOXB6, HOXB5, GM13212, EPAS1, TCF7, TWIST2, GATA6, GATA5, TWIST1, GATA3, GATA2, HOXC5, HOXC4, EGR1, NFE2, EGR2, JUN, FOXF2, FOXF1, NR2F1, NR2F2, POU2F2, SMAD6, FLI1, N…	2008	883	17446	1.22993	1	0.168896	0.162466
GOTERM_MF_DIRECT	GO:0004860	protein kinase inhibitor activity	0.592718	0.011308	CDKN1C, LRRC15, BGN, RTN4RL2, PODN, ASPN, DCN, SOCS3, FLRT2, LRRTM3, FLRT3, SH3BP5, LRRC4C, TRIB2	2008	57	17446	2.13396	1	0.181445	0.174538
GOTERM_MF_DIRECT	GO:0001972	retinoic acid binding	0.254022	0.0116567	CYP26B1, UGT1A1, CRABP2, CRABP1, LRAT, NR2F2	2008	13	17446	4.00996	1	0.181445	0.174538
GOTERM_MF_DIRECT	GO:0008191	metalloendopeptidase inhibitor activity	0.254022	0.0116567	BST2, WFIKKN2, TIMP2, TIMP3, TIMP1, NGF	2008	13	17446	4.00996	1	0.181445	0.174538
GOTERM_MF_DIRECT	GO:0001078	transcriptional repressor activity, RNA polymerase II core promoter proximal region sequence-specific binding	1.05843	0.0116711	SPI1, PRDM5, TCF21, GATA3, ASCL2, MNDAL, HOXA2, NKX3-2, E2F8, TGIF1, BATF3, IFI204, IFI205, BCL11A, IFI203, TBX3, TBX18, TBX2, NFATC4, REST, HAND1, SNAI1, SNAI2, ZFPM2, JDP2	2008	129	17446	1.68377	1	0.181445	0.174538
GOTERM_MF_DIRECT	GO:0005057	receptor signaling protein activity	0.338696	0.0122326	TIAM2, DOK2, DOK4, RGS14, RGS12, NGF, FCGR2B, TRAIP	2008	23	17446	3.022	1	0.181445	0.174538
GOTERM_MF_DIRECT	GO:0071837	HMG box domain binding	0.338696	0.0122326	EGR2, JUN, MEF2C, PRRX1, PRRX2, HOXA3, HOXC4, GATA3	2008	23	17446	3.022	1	0.181445	0.174538
GOTERM_MF_DIRECT	GO:0005234	extracellular-glutamate-gated ion channel activity	0.296359	0.0125552	GRIA1, GRID2, GRIN3A, GRIK3, GRIN2C, GRIA3, GRIA4	2008	18	17446	3.37876	1	0.181445	0.174538
GOTERM_MF_DIRECT	GO:0004970	ionotropic glutamate receptor activity	0.296359	0.0125552	GRIA1, GRID2, GRIN3A, GRIK3, GRIN2C, GRIA3, GRIA4	2008	18	17446	3.37876	1	0.181445	0.174538
GOTERM_MF_DIRECT	GO:0008017	microtubule binding	1.4818	0.0126786	MTAP7D3, RGS14, KIF14, KIF11, GLI1, SKA1, FTCD, KIF15, CAPN6, DPYSL5, NUSAP1, TPPP, FAM83D, GAS2L3, SPAG5, PLK1, KIF23, KIF22, KIF7, KIF4, CENPE, KIF18A, KIF18B, KIF26A, FES, PRC1, TRPV4, KIF26B, BIRC5, KIF2C, KIF20A, KIF20B, CRYAB, S100A9, S100A8	2008	200	17446	1.52044	1	0.181445	0.174538
GOTERM_MF_DIRECT	GO:0038085	vascular endothelial growth factor binding	0.169348	0.0127049	PDGFRB, PDGFRA, NRP1, PTN	2008	5	17446	6.9506	1	0.181445	0.174538
GOTERM_MF_DIRECT	GO:0008970	phosphatidylcholine 1-acylhydrolase activity	0.169348	0.0127049	PLA2G16, LIPC, LIPG, PLA1A	2008	5	17446	6.9506	1	0.181445	0.174538
GOTERM_MF_DIRECT	GO:0005005	transmembrane-ephrin receptor activity	0.169348	0.0127049	EPHA4, EPHB2, EPHB1, EPHB3	2008	5	17446	6.9506	1	0.181445	0.174538
GOTERM_MF_DIRECT	GO:0005534	galactose binding	0.169348	0.0127049	LGALS1, MBL2, GALK1, ENG	2008	5	17446	6.9506	1	0.181445	0.174538
GOTERM_MF_DIRECT	GO:0060228	phosphatidylcholine-sterol O-acyltransferase activator activity	0.169348	0.0127049	APOA2, APOA1, APOA4, APOE	2008	5	17446	6.9506	1	0.181445	0.174538
GOTERM_MF_DIRECT	GO:0070051	fibrinogen binding	0.169348	0.0127049	ITGB3, MFAP2, FBLN1, THBS1	2008	5	17446	6.9506	1	0.181445	0.174538
GOTERM_MF_DIRECT	GO:0016641	oxidoreductase activity, acting on the CH-NH2 group of donors, oxygen as acceptor	0.169348	0.0127049	LOX, LOXL3, LOXL4, LOXL1	2008	5	17446	6.9506	1	0.181445	0.174538
GOTERM_MF_DIRECT	GO:0003677	DNA binding	10.2879	0.01313	SPI1, IKZF1, MKI67, SOX21, SOX17, SOX18, PEG10, MYC, MYB, HOXA3, HOXA2, HOXA1, SOX8, HOXA7, SOX6, JUNB, SOX7, HOXA5, IER2, HOXA4, SOX5, PKNOX2, MEF2C, EBF1, EBF2, SOX11, EBF3, EBF4, SOX10, AR, RFX8, NEIL3, ISL2, HOXB9, HOXB4, HOXB2, DNA2, ZFPM2, HOXB7, HOXB6, HOXB5, PIF1, PARPBP, EPAS1, TWIST2, GATA6, GATA5, TWIST1, GATA3, GATA2, PRDM16, HOXC5, HOXC4, NKX2-3, GTF2A1L, NFE2, CDT1, EGR1, JUN, EGR2,…	2008	1847	17446	1.14307	1	0.185714	0.178644
GOTERM_MF_DIRECT	GO:0008081	phosphoric diester hydrolase activity	0.550381	0.0133372	PDE1A, PLCL1, PDE2A, GDPD2, PDE3A, PDE6C, PLCE1, PDE6B, PLCH2, SMPDL3B, PLCB2, PLCD1, PDE9A	2008	52	17446	2.17206	1	0.186847	0.179734
GOTERM_MF_DIRECT	GO:0042834	peptidoglycan binding	0.211685	0.0136532	PGLYRP2, TREM2, NOD2, TREM3, PGLYRP1	2008	9	17446	4.8268	1	0.189471	0.182258
GOTERM_MF_DIRECT	GO:0017124	SH3 domain binding	0.973751	0.0149279	LYN, AFAP1L2, NCF1, AFAP1, CYBA, LRP2, ARHGAP27, CD3E, CIT, ADAM19, ARHGAP31, GJA1, EFS, SH3BP1, PTTG1, INPP5D, MICAL1, DPYSL3, ADAM12, SH3BP5, HCLS1, QK, DOCK1	2008	118	17446	1.69347	1	0.205224	0.197411
GOTERM_MF_DIRECT	GO:0005540	hyaluronic acid binding	0.338696	0.0155919	CHODL, VCAN, TNFAIP6, STAB1, LAYN, SUSD5, HAPLN3, LYVE1	2008	24	17446	2.89608	1	0.210418	0.202408
GOTERM_MF_DIRECT	GO:0016209	antioxidant activity	0.338696	0.0155919	FABP1, APOM, HP, APOA4, APOE, SOD3, S100A9, S100A8	2008	24	17446	2.89608	1	0.210418	0.202408
GOTERM_MF_DIRECT	GO:0000978	RNA polymerase II core promoter proximal region sequence-specific DNA binding	2.37087	0.0159011	SPI1, PRDM5, MEOX2, GLI1, GLI3, GLI2, SOX18, MYC, SIX2, MYB, HOXA2, MYBL2, HOXA7, PITX2, JUNB, HOXA5, NKX3-2, TEAD4, TGIF1, BATF3, MEF2C, EBF1, EBF2, EBF3, FOS, SOX10, AR, RFX8, ELF4, HAND1, JDP2, ASCL2, MNDAL, E2F8, EGR2, JUN, IFI204, BCL11B, IFI205, BCL11A, IFI203, POU2F2, SMAD6, TBX3, FLI1, TBX18, PHOX2B, TBX2, BATF, NFATC4, MAFB, NR4A3, NFIA, NFIB, TLX1, FOSB	2008	359	17446	1.35527	1	0.212641	0.204546
GOTERM_MF_DIRECT	GO:0043621	protein self-association	0.592718	0.0172585	CBR2, RYR2, TMEM190, PTH1R, AGTR1A, AGTR1B, CD2, PROC, CCDC88C, ID1, CTSH, AGXT, CTSC, MBL2	2008	60	17446	2.02726	1	0.228714	0.220007
GOTERM_MF_DIRECT	GO:0017046	peptide hormone binding	0.42337	0.0182381	MAS1, EDNRB, NPR3, INHBA, AGTR2, AVPR1A, PTH1R, AGTR1A, AGTR1B, CRHR2	2008	36	17446	2.4134	1	0.239538	0.230419
GOTERM_MF_DIRECT	GO:0000979	RNA polymerase II core promoter sequence-specific DNA binding	0.635055	0.0187362	YAP1, EGR1, SPI1, GATA6, SOX11, FOS, IKZF1, GATA3, GATA2, HEYL, GBX2, TAL1, MYC, SOX8, EZH2	2008	67	17446	1.94513	1	0.243902	0.234617
GOTERM_MF_DIRECT	GO:0034713	type I transforming growth factor beta receptor binding	0.211685	0.0207103	TGFB1, TGFB3, SMAD6, TGFBR2, ENG	2008	10	17446	4.34412	1	0.267236	0.257062
GOTERM_MF_DIRECT	GO:0042813	Wnt-activated receptor activity	0.296359	0.0214572	FZD1, SFRP4, SFRP1, FZD2, SFRP2, FZD4, LRP5	2008	20	17446	3.04089	1	0.274466	0.264017
GOTERM_MF_DIRECT	GO:0030247	polysaccharide binding	0.254022	0.0223733	SBSPON, TINAGL1, ENPP3, CLEC4G, MBL1, GM933	2008	15	17446	3.4753	1	0.278908	0.26829
GOTERM_MF_DIRECT	GO:0043539	protein serine/threonine kinase activator activity	0.254022	0.0223733	TGFB1, IGF2, SPRY2, IGF1, LGALS9, LTF	2008	15	17446	3.4753	1	0.278908	0.26829
GOTERM_MF_DIRECT	GO:0008179	adenylate cyclase binding	0.254022	0.0223733	AKAP12, GRIA1, ADCYAP1R1, ADCY2, ADCY5, CAP2	2008	15	17446	3.4753	1	0.278908	0.26829
GOTERM_MF_DIRECT	GO:0055102	lipase inhibitor activity	0.169348	0.0232478	APOC2, APOA2, APOC3, APOA1	2008	6	17446	5.79216	1	0.280308	0.269637
GOTERM_MF_DIRECT	GO:0043237	laminin-1 binding	0.169348	0.0232478	NTN4, SLIT2, NID1, THBS4	2008	6	17446	5.79216	1	0.280308	0.269637
GOTERM_MF_DIRECT	GO:0043208	glycosphingolipid binding	0.169348	0.0232478	LYN, LAMA1, LAMB1, LAMC1	2008	6	17446	5.79216	1	0.280308	0.269637
GOTERM_MF_DIRECT	GO:0048495	Roundabout binding	0.169348	0.0232478	TGFB1I1, SLIT1, SLIT3, SLIT2	2008	6	17446	5.79216	1	0.280308	0.269637
GOTERM_MF_DIRECT	GO:0005504	fatty acid binding	0.338696	0.0241747	FABP1, FABP2, FABP4, FABP5, ACOX2, FABP7, ALB, FFAR4	2008	26	17446	2.67331	1	0.289114	0.278108
GOTERM_MF_DIRECT	GO:0019955	cytokine binding	0.296359	0.0271908	CSF1R, FZD4, NOG, KIT, CXCR4, OSMR, ELANE	2008	21	17446	2.89608	1	0.322562	0.310282
GOTERM_MF_DIRECT	GO:0043142	single-stranded DNA-dependent ATPase activity	0.211685	0.0296337	RFC5, RAD51, DSCC1, DNA2, CHTF18	2008	11	17446	3.9492	1	0.345962	0.332791
GOTERM_MF_DIRECT	GO:0045236	CXCR chemokine receptor binding	0.211685	0.0296337	CXCL12, CXCL1, CXCL2, CXCL5, PF4	2008	11	17446	3.9492	1	0.345962	0.332791
GOTERM_MF_DIRECT	GO:0001965	G-protein alpha-subunit binding	0.381033	0.0302349	GRIA1, GPSM2, RGS19, RGS14, F2R, HTR2B, LPAR1, RGS12, AGTR1A	2008	33	17446	2.36952	1	0.350201	0.336869
GOTERM_MF_DIRECT	GO:0004672	protein kinase activity	3.21761	0.0339354	ACVRL1, FLT1, FLT3, FLT4, NRK, LRRK1, BUB1B, HK1, MYLK, GSG2, KDR, PBK, PRKG2, NEK2, EPHB2, MAP3K6, EPHB1, PRKG1, EPHB4, EPHB3, EPHA5, PDGFRB, MAP4K1, EPHA4, PDGFRA, PRKCH, KSR1, RIPK3, HUNK, MMD2, CIT, TGFBR2, D8ERTD82E, FGR, HCK, ZAP70, OBSCN, LATS2, MELK, PRKD3, KIT, TYRO3, BTK, PRKCQ, TRIB2, EPHA3, EPHA2, DDR2, CSF1R, PKN3, TTK, MST1R, AURKC, AURKB, AURKA, ERBB2, CCL3, BUB1, LYN, TIE1, PLK1, …	2008	531	17446	1.24352	1	0.38313	0.368544
GOTERM_MF_DIRECT	GO:0001948	glycoprotein binding	0.677392	0.0342883	TGFB1, ITGAM, VWF, ITGB2, RGMA, CD2, SERPINA1A, CD4, SERPINA1C, LGALS1, APOH, ERBB2, SDC1, FLNA, VIM, FGFR1	2008	79	17446	1.75964	1	0.38313	0.368544
GOTERM_MF_DIRECT	GO:0048020	CCR chemokine receptor binding	0.338696	0.0355369	CCL24, CCL9, CCL11, CCL6, GM13304, CCL4, CCL3, CCL21A	2008	28	17446	2.48236	1	0.38313	0.368544
GOTERM_MF_DIRECT	GO:0070888	E-box binding	0.381033	0.0356826	TAL1, HAND2, MYC, ATOH8, LMO2, TWIST1, TCF21, GATA3, ASCL2	2008	34	17446	2.29983	1	0.38313	0.368544
GOTERM_MF_DIRECT	GO:0019958	C-X-C chemokine binding	0.127011	0.0366446	CXCR3, ACKR3, CXCR6	2008	3	17446	8.68825	1	0.38313	0.368544
GOTERM_MF_DIRECT	GO:0044729	hemi-methylated DNA-binding	0.127011	0.0366446	EGR1, UHRF1, WT1	2008	3	17446	8.68825	1	0.38313	0.368544
GOTERM_MF_DIRECT	GO:0034714	type III transforming growth factor beta receptor binding	0.127011	0.0366446	TGFB2, TGFB1, TGFB3	2008	3	17446	8.68825	1	0.38313	0.368544
GOTERM_MF_DIRECT	GO:0019770	IgG receptor activity	0.127011	0.0366446	FCGR1, FCGR3, FCGRT	2008	3	17446	8.68825	1	0.38313	0.368544
[truncated: 63 more rows]

## Sheet: UP_MF_T1D_vs_Healthy
#Upregulated GO enrichemnt in T1D vs Healthy Adult Group
[truncated: 97 more rows]

[truncated: 10 more sheets: UP_MF_T2D_vs_Healthy, DOWN_BP_Dev_vs_Healthy, DOWN_BP_T1D_vs_Healthy, DOWN_BP_T2D_vs_Healthy, DOWN_CC_Dev_vs_Healthy, DOWN_CC_T1D_vs_Healthy, DOWN_CC_T2D_vs_Healthy, DOWN_MF_Dev_vs_Healthy, DOWN_MF_T1D_vs_Healthy, DOWN_MF_T2D_vs_Healthy]
